# Supplementary material for: Transcriptomics of the Bed Bug (Cimex lectularius)
Source: PLoS One. 2011 Jan 19;6(1):e16336. doi: 10.1371/journal.pone.0016336 (PMC3023805; doi:10.1371/journal.pone.0016336)
Supplement: Table S1 — Gene Ontology of C. lectularius sequences. (XLSX) [file pone.0016336.s001.xlsx]

## Sheet: GO
Seq. Name	#GOs	GOs
BB454ONE000003	11	P:aerobic respiration; C:mitochondrial inner membrane; F:copper ion binding; F:electron carrier activity; F:heme binding; C:integral to membrane; F:cytochrome-c oxidase activity; P:electron transport; P:mitochondrial electron transport, cytochrome c to ox
BB454ONE000004	5	F:binding; C:mitochondrial inner membrane; P:transmembrane transport; C:integral to membrane; F:transporter activity
BB454ONE000005	5	F:binding; C:mitochondrial inner membrane; P:transmembrane transport; C:integral to membrane; F:transporter activity
BB454ONE000006	5	F:binding; C:mitochondrial inner membrane; P:transmembrane transport; C:integral to membrane; F:transporter activity
BB454ONE000007	5	F:binding; C:mitochondrial inner membrane; P:transmembrane transport; C:integral to membrane; F:transporter activity
BB454ONE000008	5	F:binding; C:mitochondrial inner membrane; P:transmembrane transport; C:integral to membrane; F:transporter activity
BB454ONE000009	5	F:binding; C:mitochondrial inner membrane; P:transmembrane transport; C:integral to membrane; F:transporter activity
BB454ONE000010	1	F:kinase activity
BB454ONE000011	1	F:kinase activity
BB454ONE000012	1	F:kinase activity
BB454ONE000013	1	F:kinase activity
BB454ONE000014	4	F:transition metal ion binding; C:membrane part; C:mitochondrion; P:electron transport chain
BB454ONE000015	4	F:transition metal ion binding; C:membrane part; C:mitochondrion; P:electron transport chain
BB454ONE000016	1	F:structural constituent of cuticle
BB454ONE000017	1	F:structural constituent of cuticle
BB454ONE000018	1	F:structural constituent of cuticle
BB454ONE000019	1	F:structural constituent of cuticle
BB454ONE000020	5	F:hydrogen ion transmembrane transporter activity; C:mitochondrion; P:ATP synthesis coupled proton transport; C:proton-transporting ATP synthase complex, coupling factor F(o); C:integral to membrane
BB454ONE000021	5	F:hydrogen ion transmembrane transporter activity; C:mitochondrion; P:ATP synthesis coupled proton transport; C:proton-transporting ATP synthase complex, coupling factor F(o); C:integral to membrane
BB454ONE000022	5	F:hydrogen ion transmembrane transporter activity; C:mitochondrion; P:ATP synthesis coupled proton transport; C:proton-transporting ATP synthase complex, coupling factor F(o); C:integral to membrane
BB454ONE000023	5	F:hydrogen ion transmembrane transporter activity; C:mitochondrion; P:ATP synthesis coupled proton transport; C:proton-transporting ATP synthase complex, coupling factor F(o); C:integral to membrane
BB454ONE000024	1	C:A band
BB454ONE000025	0
BB454ONE000026	0
BB454ONE000027	1	C:A band
BB454ONE000028	1	C:A band
BB454ONE000029	0
BB454ONE000030	1	C:A band
BB454ONE000031	2	C:membrane; F:oxidoreductase activity
BB454ONE000032	3	F:metal ion binding; C:membrane part; P:electron transport chain
BB454ONE000033	5	P:cardiac muscle tissue development; P:skeletal muscle tissue development; P:sarcomere organization; F:cytoskeletal protein binding; P:nervous system development
BB454ONE000034	0
BB454ONE000035	4	P:cardiac muscle tissue development; P:skeletal muscle tissue development; P:sarcomere organization; P:nervous system development
BB454ONE000036	0
BB454ONE000037	5	P:cardiac muscle tissue development; P:skeletal muscle tissue development; P:sarcomere organization; F:cytoskeletal protein binding; P:nervous system development
BB454ONE000038	5	P:cardiac muscle tissue development; P:skeletal muscle tissue development; P:sarcomere organization; F:cytoskeletal protein binding; P:nervous system development
BB454ONE000039	0
BB454ONE000040	0
BB454ONE000041	0
BB454ONE000042	0
BB454ONE000043	0
BB454ONE000044	0
BB454ONE000045	0
BB454ONE000046	0
BB454ONE000047	0
BB454ONE000048	0
BB454ONE000049	0
BB454ONE000050	0
BB454ONE000051	0
BB454ONE000052	0
BB454ONE000053	0
BB454ONE000054	0
BB454ONE000055	2	C:myosin complex; F:calcium ion binding
BB454ONE000056	2	C:myosin complex; F:calcium ion binding
BB454ONE000069	7	C:cytoplasm; F:guanyl-nucleotide exchange factor activity; C:tubulin complex; P:positive regulation of multicellular organism growth; P:positive regulation of cell size; F:calcium ion binding; P:regulation of GTPase activity
BB454ONE000726	1	C:ribonucleoprotein complex
BB454ONE000729	0
BB454ONE000730	5	P:S-adenosylmethionine cycle; F:adenosylhomocysteinase activity; P:one-carbon compound metabolic process; F:binding; P:methionine metabolic process
BB454ONE000731	5	P:S-adenosylmethionine cycle; F:adenosylhomocysteinase activity; P:one-carbon compound metabolic process; F:binding; P:methionine metabolic process
BB454ONE000734	6	C:mitochondrial inner membrane; F:ubiquinol-cytochrome-c reductase activity; P:mitochondrial electron transport, ubiquinol to cytochrome c; P:electron transport; P:proton transport;
BB454ONE000735	6	C:mitochondrial inner membrane; F:ubiquinol-cytochrome-c reductase activity; P:mitochondrial electron transport, ubiquinol to cytochrome c; P:electron transport; P:proton transport;
BB454ONE000736	4	F:lipid binding; F:binding; F:transporter activity; P:transport
BB454ONE000737	4	F:lipid binding; F:binding; F:transporter activity; P:transport
BB454ONE000738	0
BB454ONE000739	6	C:mitochondrial inner membrane; F:ubiquinol-cytochrome-c reductase activity; P:mitochondrial electron transport, ubiquinol to cytochrome c; P:electron transport; P:proton transport;
BB454ONE000740	6	C:mitochondrial inner membrane; F:ubiquinol-cytochrome-c reductase activity; P:mitochondrial electron transport, ubiquinol to cytochrome c; P:electron transport; P:proton transport;
BB454ONE000741	4	F:binding; C:mitochondrial inner membrane; C:membrane part; P:cellular metabolic process
BB454ONE000742	4	F:binding; C:mitochondrial inner membrane; C:membrane part; P:cellular metabolic process
BB454ONE000743	0
BB454ONE000746	3	F:protein binding; C:cytosolic small ribosomal subunit; P:translational elongation
BB454ONE000747	3	F:protein binding; C:cytosolic small ribosomal subunit; P:translational elongation
BB454ONE000748	5	P:proteolysis; F:metallopeptidase activity; F:aminopeptidase activity; F:peptidase activity; F:zinc ion binding
BB454ONE000749	0
BB454ONE000750	0
BB454ONE000751	10	P:positive regulation of growth rate; C:nucleosome; P:embryonic development ending in birth or egg hatching; P:regulation of cell shape; F:DNA binding; P:body morphogenesis; P:cell adhesion; P:nematode larval development; P:nucleosome assembly; C:Barr bod
BB454ONE000752	12	P:oxidation reduction; P:L-phenylalanine catabolic process; F:tryptophan 5-monooxygenase activity; P:phagocytosis, engulfment; F:amino acid binding; C:lipid particle; F:phenylalanine 4-monooxygenase activity; P:eye pigment biosynthetic process; F:iron ion
BB454ONE000753	12	P:oxidation reduction; P:L-phenylalanine catabolic process; F:tryptophan 5-monooxygenase activity; P:phagocytosis, engulfment; F:amino acid binding; C:lipid particle; F:phenylalanine 4-monooxygenase activity; P:eye pigment biosynthetic process; F:iron ion
BB454ONE000754	3	F:hydroxyacid-oxoacid transhydrogenase activity; C:mitochondrion; P:molecular hydrogen transport
BB454ONE000755	2	F:lysozyme activity; C:membrane
BB454ONE000758	5	C:ribosome; F:structural constituent of ribosome; P:translation; F:rRNA binding; P:ribosome biogenesis
BB454ONE000759	5	C:ribosome; F:structural constituent of ribosome; P:translation; F:rRNA binding; P:ribosome biogenesis
BB454ONE000760	5	C:mitochondrial inner membrane; C:respiratory chain; F:electron carrier activity; P:electron transport chain; P:electron transport
BB454ONE000761	5	C:mitochondrial inner membrane; C:respiratory chain; F:electron carrier activity; P:electron transport chain; P:electron transport
BB454ONE000762	4	C:cytosol; F:translation initiation factor activity; C:ribosome; P:regulation of translational initiation
BB454ONE000763	4	C:cytosol; F:translation initiation factor activity; C:ribosome; P:regulation of translational initiation
BB454ONE000764	7	P:mitotic spindle elongation; F:structural constituent of ribosome; C:lipid particle; F:protein binding; C:cytosolic large ribosomal subunit; P:translation; P:ribosome biogenesis
BB454ONE000765	7	P:mitotic spindle elongation; F:structural constituent of ribosome; C:lipid particle; F:protein binding; C:cytosolic large ribosomal subunit; P:translation; P:ribosome biogenesis
BB454ONE000768	5	P:cellular iron ion homeostasis; F:oxidoreductase activity; F:ferric iron binding; P:oxidation reduction; P:iron ion transport
BB454ONE000769	5	P:cellular iron ion homeostasis; F:oxidoreductase activity; F:ferric iron binding; P:oxidation reduction; P:iron ion transport
BB454ONE000770	4	C:ribosome; F:structural constituent of ribosome; P:ribosome biogenesis; P:translation
BB454ONE000771	4	C:ribosome; F:structural constituent of ribosome; P:ribosome biogenesis; P:translation
BB454ONE000772	7	P:mitotic spindle elongation; F:structural constituent of ribosome; C:lipid particle; C:cytosolic small ribosomal subunit; P:translation; P:immune response; P:ribosome biogenesis
BB454ONE000773	7	P:mitotic spindle elongation; F:structural constituent of ribosome; C:lipid particle; C:cytosolic small ribosomal subunit; P:translation; P:immune response; P:ribosome biogenesis
BB454ONE000776	3	F:chitin binding; P:chitin metabolic process; C:extracellular region
BB454ONE000777	3	F:chitin binding; P:chitin metabolic process; C:extracellular region
BB454ONE000780	0
BB454ONE000781	7	P:mitotic spindle elongation; F:structural constituent of ribosome; C:cytosolic large ribosomal subunit; F:zinc ion binding; P:translation; F:rRNA binding; P:ribosome biogenesis
BB454ONE000782	7	P:mitotic spindle elongation; F:structural constituent of ribosome; C:cytosolic large ribosomal subunit; F:zinc ion binding; P:translation; F:rRNA binding; P:ribosome biogenesis
BB454ONE000783	2	F:molecular_function; C:cellular_component
BB454ONE000784	2	F:molecular_function; C:cellular_component
BB454ONE000785	10	F:proton-transporting ATPase activity, rotational mechanism; F:hydrogen-exporting ATPase activity, phosphorylative mechanism; P:growth; F:hydrogen ion transporting ATP synthase activity, rotational mechanism; P:phagocytosis, engulfment; P:plasma membrane
BB454ONE000786	3	F:transporter activity; F:lipid binding; P:transport
BB454ONE000787	3	F:transporter activity; F:lipid binding; P:transport
BB454ONE000788	1	C:membrane
BB454ONE000789	1	C:membrane
BB454ONE000790	6	P:mitotic spindle elongation; F:structural constituent of ribosome; C:lipid particle; C:cytosolic large ribosomal subunit; P:translation; P:ribosome biogenesis
BB454ONE000791	6	P:mitotic spindle elongation; F:structural constituent of ribosome; C:lipid particle; C:cytosolic large ribosomal subunit; P:translation; P:ribosome biogenesis
BB454ONE000792	19	P:microtubule-based process; F:nucleoside diphosphate kinase activity; P:CTP biosynthetic process; P:protein amino acid autophosphorylation; C:nuclear microtubule; F:SUMO binding; F:GTP binding; F:microtubule binding; P:nucleoside diphosphate phosphorylat
BB454ONE000793	19	P:microtubule-based process; F:nucleoside diphosphate kinase activity; P:CTP biosynthetic process; P:protein amino acid autophosphorylation; C:nuclear microtubule; F:SUMO binding; F:GTP binding; F:microtubule binding; P:nucleoside diphosphate phosphorylat
BB454ONE000794	2	C:extracellular region; P:response to virus
BB454ONE000795	3	P:mitotic spindle elongation; C:lipid particle; C:ribonucleoprotein complex
BB454ONE000798	12	F:signal transducer activity; P:small GTPase mediated signal transduction; P:protein amino acid ADP-ribosylation; P:neurotransmitter secretion; F:GTPase activity; F:NAD(P)+-protein-arginine ADP-ribosyltransferase activity; P:endosome transport; P:synaptic
BB454ONE000799	12	F:signal transducer activity; P:small GTPase mediated signal transduction; P:protein amino acid ADP-ribosylation; P:neurotransmitter secretion; F:GTPase activity; F:NAD(P)+-protein-arginine ADP-ribosyltransferase activity; P:endosome transport; P:synaptic
BB454ONE000802	1	P:response to stress
BB454ONE000803	1	P:response to stress
BB454ONE000804	3	P:male courtship behavior; P:circadian rhythm; P:behavioral response to starvation
BB454ONE000805	3	P:male courtship behavior; P:circadian rhythm; P:behavioral response to starvation
BB454ONE000806	7	F:transcription cofactor activity; F:nucleic acid binding; F:ATP-dependent helicase activity; F:ATP binding; F:RNA helicase activity; P:positive regulation of transcription; C:transcription factor complex
BB454ONE000807	7	F:transcription cofactor activity; F:nucleic acid binding; F:ATP-dependent helicase activity; F:ATP binding; F:RNA helicase activity; P:positive regulation of transcription; C:transcription factor complex
BB454ONE000808	4	C:ribosome; F:structural constituent of ribosome; P:translation; P:ribosome biogenesis
BB454ONE000809	4	C:ribosome; F:structural constituent of ribosome; P:translation; P:ribosome biogenesis
BB454ONE000811	7	P:cellular carbohydrate metabolic process; F:acyltransferase activity; C:mitochondrial matrix; F:citrate (Si)-synthase activity; P:tricarboxylic acid cycle; P:acyl-carrier-protein biosynthetic process; P:glyoxylate metabolic process
BB454ONE000812	7	P:cellular carbohydrate metabolic process; F:acyltransferase activity; C:mitochondrial matrix; F:citrate (Si)-synthase activity; P:tricarboxylic acid cycle; P:acyl-carrier-protein biosynthetic process; P:glyoxylate metabolic process
BB454ONE000813	3	P:male courtship behavior; P:circadian rhythm; P:behavioral response to starvation
BB454ONE000814	3	P:male courtship behavior; P:circadian rhythm; P:behavioral response to starvation
BB454ONE000815	4	C:ribosome; F:structural constituent of ribosome; P:translation; P:ribosome biogenesis
BB454ONE000816	4	C:ribosome; F:structural constituent of ribosome; P:translation; P:ribosome biogenesis
BB454ONE000817	6	C:cytoplasm; C:soluble fraction; C:membrane fraction; P:adaptation of rhodopsin mediated signaling; F:metarhodopsin binding; P:metarhodopsin inactivation
BB454ONE000818	6	C:cytoplasm; C:soluble fraction; C:membrane fraction; P:adaptation of rhodopsin mediated signaling; F:metarhodopsin binding; P:metarhodopsin inactivation
BB454ONE000819	6	P:mitochondrial electron transport, NADH to ubiquinone; F:NADH dehydrogenase (ubiquinone) activity; C:mitochondrial respiratory chain complex I; P:ubiquinone biosynthetic process; P:sodium ion transport; P:proton transport
BB454ONE000820	6	P:mitochondrial electron transport, NADH to ubiquinone; F:NADH dehydrogenase (ubiquinone) activity; C:mitochondrial respiratory chain complex I; P:ubiquinone biosynthetic process; P:sodium ion transport; P:proton transport
BB454ONE000822	4	C:ribosome; F:structural constituent of ribosome; P:translation; P:ribosome biogenesis
BB454ONE000824	2	C:lipid particle; P:oxidative phosphorylation
BB454ONE000825	2	C:lipid particle; P:oxidative phosphorylation
BB454ONE000826	2	F:odorant binding; P:transport
BB454ONE000827	2	F:odorant binding; P:transport
BB454ONE000836	4	F:ATP binding; F:arginine kinase activity; P:arginine metabolic process; P:proline metabolic process
BB454ONE000837	4	F:ATP binding; F:arginine kinase activity; P:arginine metabolic process; P:proline metabolic process
BB454ONE000838	6	P:proteolysis; F:hydrolase activity; F:cysteine-type endopeptidase inhibitor activity; F:cysteine-type peptidase activity; F:peptidase activity; F:cysteine-type endopeptidase activity
BB454ONE000839	6	P:proteolysis; F:hydrolase activity; F:cysteine-type endopeptidase inhibitor activity; F:cysteine-type peptidase activity; F:peptidase activity; F:cysteine-type endopeptidase activity
BB454ONE000840	5	F:glutathione peroxidase activity; F:transferase activity; P:glutathione metabolic process; F:peroxidase reaction; P:response to oxidative stress
BB454ONE000842	0
BB454ONE000843	0
BB454ONE000844	5	P:mesoderm development; F:structural constituent of muscle; P:myofibril assembly; F:motor activity; C:striated muscle thick filament
BB454ONE000845	11	C:fusome; P:germ-line cyst formation; P:meiotic spindle organization; P:testicular fusome organization; P:cystoblast division; C:germline ring canal; P:ovarian fusome organization; P:centrosome organization; C:spectrosome; C:lipid particle; C:plasma membr
BB454ONE000846	13	P:small GTPase mediated signal transduction; C:endocytic vesicle; C:endosome; C:membrane fraction; C:melanosome; F:GTP-dependent protein binding; F:GTPase activity; P:regulation of endocytosis; C:anchored to membrane; P:endosome organization; P:protein tr
BB454ONE000847	1	P:response to metal ion
BB454ONE000848	4	P:cell communication; F:phosphoinositide binding; P:phagocytosis, engulfment; F:protein binding
BB454ONE000850	1	F:hydrolase activity
BB454ONE000851	0
BB454ONE000852	1	P:protein folding
BB454ONE000853	0
BB454ONE000854	3	F:binding; P:cellular biopolymer metabolic process; P:nucleobase, nucleoside, nucleotide and nucleic acid metabolic process
BB454ONE000856	9	P:cell proliferation; F:DNA binding; F:structural constituent of ribosome; F:protein binding; C:cytosolic small ribosomal subunit; C:nucleus; F:zinc ion binding; P:translational elongation; P:ribosome biogenesis
BB454ONE000857	1	C:membrane
BB454ONE000858	12	P:haltere development; P:cuticle development; P:cytokinesis; C:integral to membrane; P:cellularization; P:synaptic vesicle docking during exocytosis; P:regulation of pole plasm oskar mRNA localization; F:SNAP receptor activity; P:synaptic vesicle fusion t
BB454ONE000859	5	F:U6 snRNA binding; F:protein binding; C:ribonucleoprotein complex; C:nucleus; P:nuclear mRNA splicing, via spliceosome
BB454ONE000861	8	F:zinc ion binding; F:nucleic acid binding; F:5'-3' exoribonuclease activity; C:nucleolus; F:protein binding; P:DNA catabolic process, exonucleolytic; P:transcription; P:regulation of RNA metabolic process
BB454ONE000862	5	F:transcription regulator activity; P:transcription initiation from RNA polymerase II promoter; P:regulation of transcription, DNA-dependent; F:protein binding; C:Srb-mediator complex
BB454ONE000863	0
BB454ONE000864	3	P:metabolic process; F:oxidoreductase activity; F:iron ion binding
BB454ONE000866	3	F:translation initiation factor activity; C:ribosome; P:regulation of translational initiation
BB454ONE000867	2	C:membrane; P:ion transport
BB454ONE000869	0
BB454ONE000870	12	C:pyruvate dehydrogenase complex; C:lipid particle; F:dihydrolipoyllysine-residue acetyltransferase activity; F:protein binding; P:positive regulation of growth rate; P:reproduction; P:embryonic development ending in birth or egg hatching; F:lipoic acid b
BB454ONE000871	16	F:microtubule motor activity; F:cytoskeletal protein binding; C:cytosol; P:sperm individualization; P:actin filament bundle formation; C:microtubule; C:myosin complex; F:ATPase activity, coupled; P:imaginal disc-derived wing morphogenesis; C:cytoplasmic d
BB454ONE000872	7	F:metal ion binding; P:oxidation reduction; F:electron carrier activity; F:oxidoreductase activity; F:heme binding; F:iron ion binding; F:monooxygenase activity
BB454ONE000873	18	P:nuclear-transcribed mRNA catabolic process, nonsense-mediated decay; C:chromatin; P:regulation of alternative nuclear mRNA splicing, via spliceosome; P:negative regulation of translation; C:omega speckle; F:nucleotide binding; P:mRNA export from nucleus
BB454ONE000875	2	F:nucleic acid binding; C:ribonucleoprotein complex
BB454ONE000877	8	F:NADH dehydrogenase (ubiquinone) activity; C:mitochondrial respiratory chain complex I; P:mitochondrial electron transport, NADH to ubiquinone; C:mitochondrial matrix; C:lipid particle; P:ubiquinone biosynthetic process; P:sodium ion transport; P:proton
BB454ONE000878	1	F:calcium ion binding
BB454ONE000880	2	P:metabolic process; C:plastid
BB454ONE000881	7	P:positive regulation of mitotic cell cycle; P:regulation of transcription from RNA polymerase II promoter; P:negative regulation of Wnt receptor signaling pathway; P:imaginal disc-derived wing morphogenesis; P:cell adhesion; P:negative regulation of tran
BB454ONE000884	7	C:mitochondrion; C:lysosome; P:proteolysis; F:aspartic-type endopeptidase activity; F:hydrolase activity; P:autophagic vacuole formation; F:peptidase activity
BB454ONE000887	2	F:nucleic acid binding; F:nucleotide binding
BB454ONE000888	8	F:structural constituent of ribosome; F:RNA binding; F:ribonuclease III activity; F:hydrolase activity; P:RNA processing; C:ribosome; F:double-stranded RNA binding; C:intracellular
BB454ONE000890	6	P:microtubule-based movement; F:GTP binding; P:protein polymerization; F:structural molecule activity; F:GTPase activity; C:microtubule
BB454ONE000892	3	F:2-hydroxyglutarate dehydrogenase activity; P:cellular protein metabolic process; C:integral to membrane
BB454ONE000893	3	C:extracellular region; F:chitin binding; P:chitin metabolic process
BB454ONE000894	1	C:lipid particle
BB454ONE000895	9	P:regulation of transcription from RNA polymerase II promoter; P:transcription initiation from RNA polymerase II promoter; P:muscle organ development; F:RNA polymerase II transcription mediator activity; C:Srb-mediator complex; F:transcription coactivator
BB454ONE000897	3	F:protein binding; C:membrane; C:mitochondrial nucleoid
BB454ONE000899	12	P:neuromuscular synaptic transmission; P:actin filament organization; F:cyclic nucleotide binding; F:cAMP-dependent protein kinase regulator activity; P:oocyte microtubule cytoskeleton polarization; F:kinase activity; P:cAMP-mediated signaling; P:regulati
BB454ONE000900	5	P:mitotic spindle elongation; F:structural constituent of ribosome; C:cytosolic large ribosomal subunit; P:translation; P:ribosome biogenesis
BB454ONE000902	3	F:nucleic acid binding; F:zinc ion binding; C:intracellular
BB454ONE000903	0
BB454ONE000904	0
BB454ONE000906	0
BB454ONE000907	5	F:metal ion binding; P:modification-dependent protein catabolic process; P:cell division; P:mitosis; C:nucleus
BB454ONE000909	3	C:intracellular; F:GTP binding; P:small GTPase mediated signal transduction
BB454ONE000911	1	F:kinase activity
BB454ONE000912	0
BB454ONE000913	4	F:molecular_function; P:multicellular organismal development; P:biological_process; C:cellular_component
BB454ONE000915	5	C:ribosome; F:structural constituent of ribosome; P:translation; F:rRNA binding; P:ribosome biogenesis
BB454ONE000916	0
BB454ONE000917	3	C:cell part; P:metabolic process; F:oxidoreductase activity, acting on the CH-CH group of donors
BB454ONE000918	2	P:folic acid and derivative metabolic process; F:gamma-glutamyl-peptidase activity
BB454ONE000919	2	P:primary metabolic process; F:peptidase activity
BB454ONE000920	9	F:protein kinase C binding; C:mitochondrion; C:synapse; P:protein targeting; F:receptor binding; P:receptor clustering; F:ATPase activity; C:perinuclear region of cytoplasm; C:Golgi apparatus
BB454ONE000921	3	F:peroxidase activity; F:peroxidase reaction; P:response to oxidative stress
BB454ONE000922	3	F:endopeptidase activity; C:membrane; P:negative regulation of apoptosis
BB454ONE000923	1	F:binding
BB454ONE000925	0
BB454ONE000929	1	C:integral to membrane
BB454ONE000932	0
BB454ONE000933	5	F:metal ion binding; P:oxidation reduction; F:oxidoreductase activity; P:superoxide metabolic process; F:superoxide dismutase activity
BB454ONE000936	0
BB454ONE000938	1	C:cell part
BB454ONE000939	5	P:transport; F:ribonuclease activity; P:tRNA processing; C:mitochondrion; P:regulation of RNA metabolic process
BB454ONE000943	5	F:P-P-bond-hydrolysis-driven protein transmembrane transporter activity; C:mitochondrial outer membrane translocase complex; P:protein targeting to mitochondrion; F:unfolded protein binding; C:chloroplast envelope
BB454ONE000945	1	C:cytoplasmic membrane-bounded vesicle
BB454ONE000947	5	C:integral to membrane; C:membrane; P:transmembrane transport; F:transporter activity; P:transport
BB454ONE000949	4	P:mesoderm development; F:protein binding; F:calcium ion binding; C:membrane
BB454ONE000952	2	P:response to wounding; F:carboxylesterase activity
BB454ONE000953	7	P:cellular response to DNA damage stimulus; F:glutamate-cysteine ligase catalytic subunit binding; P:olfactory learning; F:enzyme regulator activity; C:cytosol; P:glutathione biosynthetic process; P:positive regulation of glutamate-cysteine ligase activit
BB454ONE000955	3	P:heme biosynthetic process; P:erythrocyte differentiation; C:membrane
BB454ONE000956	4	F:uridine kinase activity; F:ATP binding; F:phosphotransferase activity, alcohol group as acceptor; P:pyrimidine base metabolic process
BB454ONE000957	3	C:extracellular region; F:kinase activity; P:response to virus
BB454ONE000958	0
BB454ONE000959	6	P:cytoskeletal anchoring at plasma membrane; C:focal adhesion; F:calcium ion binding; P:actin cytoskeleton reorganization; F:actin filament binding; P:actin filament bundle formation
BB454ONE000960	3	C:ribonucleoprotein complex; C:nucleus; P:ribosome biogenesis
BB454ONE000961	2	F:carboxylesterase activity; C:membrane
BB454ONE000962	8	F:structural constituent of cytoskeleton; P:microtubule-based movement; F:GTP binding; C:tubulin complex; P:muscle attachment; P:protein polymerization; F:GTPase activity; C:microtubule
BB454ONE000963	8	C:cytoplasm; F:GTP binding; F:protein binding; F:hydrolase activity; P:ATP catabolic process; F:ATP binding; P:small GTPase mediated signal transduction; P:protein transport
BB454ONE000965	23	P:axon guidance; P:ER-associated protein catabolic process; C:nucleoplasm; F:transcription regulator activity; P:positive regulation of transcription; F:protein binding; P:regulation of transcription, DNA-dependent; P:regulation of synaptic plasticity; P:
BB454ONE000967	3	P:biological_process; F:protein binding; C:cellular_component
BB454ONE000968	3	F:receptor activity; P:multicellular organismal development; C:membrane
BB454ONE000969	2	C:secretory granule; P:neuropeptide signaling pathway
BB454ONE000971	4	F:hydrogen ion transmembrane transporter activity; P:ATP synthesis coupled proton transport; C:mitochondrial proton-transporting ATP synthase complex, coupling factor F(o); F:hydrolase activity
BB454ONE000972	2	F:actin binding; P:actomyosin structure organization
BB454ONE000973	1	F:kinase activity
BB454ONE000974	4	F:carnitine O-palmitoyltransferase activity; P:fatty acid metabolic process; P:acyl-carrier-protein biosynthetic process; P:glycerolipid metabolic process
BB454ONE000975	6	C:Golgi apparatus; C:plasma membrane; P:zinc ion transport; F:ferrous iron transmembrane transporter activity; F:zinc ion transmembrane transporter activity; P:ferrous iron transport
BB454ONE000976	1	C:integral to membrane
BB454ONE000978	12	P:epithelial cell migration, open tracheal system; P:striated muscle contraction; F:structural constituent of muscle; F:microfilament motor activity; C:A band; F:ATPase activity, coupled; F:ATP binding; F:actin binding; C:striated muscle thick filament; F
BB454ONE000979	2	F:molecular_function; C:cellular_component
BB454ONE000980	2	P:cellular process; P:metabolic process
BB454ONE000981	1	F:hydrolase activity
BB454ONE000984	5	P:regulation of calcium ion transport; P:peripheral nervous system development; F:protein binding; P:detection of light stimulus involved in visual perception; C:inaD signaling complex
BB454ONE000987	13	P:oocyte anterior/posterior axis specification; P:compound eye photoreceptor cell differentiation; F:protein binding; P:protein deneddylation; P:axonogenesis; P:protein stabilization; C:cytoplasm; P:oocyte dorsal/ventral axis specification; P:glial cell m
BB454ONE000989	2	P:transport; P:protein transport
BB454ONE000990	11	C:cytosol; P:positive regulation of growth rate; F:RNA binding; C:protein complex; P:embryonic development ending in birth or egg hatching; P:reproduction; P:spliceosomal snRNP biogenesis; P:nematode larval development; F:protein binding; P:locomotion; C:
BB454ONE000993	7	F:phosphoribosylaminoimidazolecarboxamide formyltransferase activity; P:'de novo' IMP biosynthetic process; F:protein binding; F:IMP cyclohydrolase activity; P:organ regeneration; P:purine base metabolic process; C:mitochondrial inner membrane peptidase c
BB454ONE000994	23	C:cytosol; C:secretory granule; P:negative regulation of endothelial cell proliferation; C:aminoacyl-tRNA synthetase multienzyme complex; P:apoptosis; P:cell-cell signaling; P:inflammatory response; P:negative regulation of angiogenesis; F:cytokine activi
BB454ONE000996	2	C:integral to membrane; C:membrane
BB454ONE000997	1	P:growth
BB454ONE000998	2	F:queuine tRNA-ribosyltransferase activity; P:queuosine biosynthetic process
BB454ONE000999	28	C:acrosomal matrix; P:sperm capacitation; F:dihydrolipoyl dehydrogenase activity; P:acetyl-CoA biosynthetic process from pyruvate; P:gastrulation; C:mitochondrial matrix; C:flagellum; P:mitochondrial electron transport, NADH to ubiquinone; P:aging; F:elec
BB454ONE001000	11	P:mitotic cell cycle; P:protein amino acid dephosphorylation; P:response to oxidative stress; P:positive regulation of R7 cell differentiation; F:manganese ion binding; C:protein serine/threonine phosphatase complex; P:negative regulation of MAP kinase ac
BB454ONE001001	7	P:myeloid cell differentiation; F:calcium ion binding; C:integral to membrane; P:phospholipid transport; P:immune response; P:response to virus; F:SH3 domain binding
BB454ONE001003	7	F:Ran GTPase binding; F:GDP-dissociation inhibitor activity; C:centrosome; P:spindle organization; P:signal transduction; C:nucleus; P:positive regulation of mitotic centrosome separation
BB454ONE001004	2	F:N-acetyltransferase activity; P:acyl-carrier-protein biosynthetic process
BB454ONE001005	4	F:metal ion binding; P:oxidation reduction; F:oxidoreductase activity, acting on single donors with incorporation of molecular oxygen, incorporation of two atoms of oxygen; P:methionine salvage
BB454ONE001006	1	C:membrane
BB454ONE001007	1	F:transition metal ion binding
BB454ONE001009	2	C:membrane; F:binding
BB454ONE001011	2	C:integral to membrane; C:membrane
BB454ONE001012	4	P:response to copper ion; P:hemoglobin biosynthetic process; P:embryonic hemopoiesis; P:response to iron ion
BB454ONE001013	4	C:extracellular region; F:chitin binding; F:hydrolase activity, acting on carbon-nitrogen (but not peptide) bonds; P:chitin metabolic process
BB454ONE001016	0
BB454ONE001018	6	C:sulfate adenylyltransferase complex (ATP); F:sulfate adenylyltransferase (ATP) activity; F:ATP binding; P:sulfate assimilation; F:adenylylsulfate kinase activity; P:purine base metabolic process
BB454ONE001020	0
BB454ONE001022	2	F:hydrolase activity; F:acid phosphatase activity
BB454ONE001023	11	C:cytosol; C:nucleolus; C:centrosome; P:glycerol biosynthetic process from pyruvate; F:magnesium ion binding; P:response to insulin stimulus; F:kinase activity; P:gluconeogenesis; F:phosphoenolpyruvate carboxykinase (GTP) activity; F:GTP binding; P:tricar
BB454ONE001024	7	F:FAD binding; P:oxidation reduction; F:isovaleryl-CoA dehydrogenase activity; P:electron transport; P:isoleucine catabolic process; P:leucine catabolic process; P:valine catabolic process
BB454ONE001025	7	C:intracellular membrane-bounded organelle; P:small GTPase mediated signal transduction; C:cytoplasmic part; F:hydrolase activity; P:protein transport; C:membrane; F:GTP binding
BB454ONE001028	14	F:methylmalonate-semialdehyde dehydrogenase (acylating) activity; F:malonate-semialdehyde dehydrogenase (acetylating) activity; P:oxidation reduction; F:acyl-CoA binding; P:thymine metabolic process; C:mitochondrion; P:inositol metabolic process; P:isoleu
BB454ONE001029	4	F:structural constituent of ribosome; P:translation; C:ribosome; C:intracellular
BB454ONE001032	8	C:endosome; P:endosome to lysosome transport; C:extrinsic to membrane; F:protein binding; P:lysosome organization; C:nucleus; C:cytosol; P:protein transport
BB454ONE001033	1	C:ribosome
BB454ONE001034	0
BB454ONE001035	2	F:carbon-monoxide oxygenase activity; C:integral to membrane
BB454ONE001036	13	C:cytosol; F:histone binding; C:soluble fraction; C:mitochondrion; P:glycerol metabolic process; P:response to ethanol; F:glycerol kinase activity; P:response to cold; F:nucleotide binding; P:response to drug; C:membrane; C:nucleus; P:glycerolipid metabol
BB454ONE001038	2	F:zinc ion binding; F:nucleic acid binding
BB454ONE001039	0
BB454ONE001040	9	P:protein folding; F:ATPase activity; C:lipid particle; P:oxidation reduction; F:ATP binding; F:unfolded protein binding; P:response to heat; C:mitochondrion; F:2-alkenal reductase activity
BB454ONE001042	4	F:transcription regulator activity; P:regulation of transcription; F:protein binding; C:nucleus
BB454ONE001044	0
BB454ONE001045	7	C:endoplasmic reticulum; P:oxidation reduction; F:iron ion binding; F:NADPH-hemoprotein reductase activity; F:FMN binding; C:extrinsic to membrane; P:electron transport
BB454ONE001046	1	C:viral capsid
BB454ONE001047	3	P:perineurial glial growth; F:calmodulin binding; P:sperm individualization
BB454ONE001049	2	F:4 iron, 4 sulfur cluster binding; P:metabolic process
BB454ONE001050	11	P:aerobic respiration; C:mitochondrial inner membrane; F:copper ion binding; F:electron carrier activity; F:heme binding; C:integral to membrane; F:cytochrome-c oxidase activity; P:electron transport; P:mitochondrial electron transport, cytochrome c to ox
BB454ONE001052	9	F:metal ion binding; F:alpha-ketoacid dehydrogenase activity; F:3-methyl-2-oxobutanoate dehydrogenase (2-methylpropanoyl-transferring) activity; F:protein binding; F:carboxy-lyase activity; P:isoleucine catabolic process; P:leucine catabolic process; P:va
BB454ONE001054	7	P:regulation of smoothened signaling pathway; P:protein modification process; P:regulation of ubiquitin-protein ligase activity; P:cell proliferation; P:ubiquitin-dependent protein catabolic process; P:regulation of proteolysis; P:regulation of protein st
BB454ONE001056	1	C:mitochondrion
BB454ONE001060	12	C:small nuclear ribonucleoprotein complex; C:ribosome; F:mRNA binding; C:spliceosome; P:peripheral nervous system development; P:ribosome biogenesis; F:protein binding; F:snoRNA binding; P:nuclear mRNA splicing, via spliceosome; C:box C/D snoRNP complex;
BB454ONE001061	7	F:heme binding; C:membrane; P:steroid biosynthetic process; P:oxidation reduction; F:monooxygenase activity; F:electron carrier activity; P:electron transport
BB454ONE001062	14	C:chromatin; P:chromatin modification; F:GTP binding; P:chromatin assembly or disassembly; F:chromatin binding; F:histone-lysine N-methyltransferase activity; F:translation initiation factor activity; C:nucleus; F:zinc ion binding; F:GTPase activity; P:pr
BB454ONE001066	9	P:mitotic spindle elongation; F:RNA binding; F:SUMO binding; P:rRNA processing; F:structural constituent of ribosome; P:translational elongation; C:cytosolic small ribosomal subunit; P:ribosomal small subunit biogenesis; C:lipid particle
BB454ONE001067	6	F:ligase activity; F:protein binding; F:phosphoribosylglycinamide formyltransferase activity; P:'de novo' IMP biosynthetic process; P:purine base metabolic process; P:10-formyltetrahydrofolate metabolic process
BB454ONE001068	10	C:cytoplasm; P:protein folding; F:endopeptidase activity; C:proteasome regulatory particle, base subcomplex; P:cellular response to DNA damage stimulus; F:ATPase activity; F:protein binding; F:ATP binding; P:proteolysis; C:male germ cell nucleus
BB454ONE001069	5	F:receptor activity; F:nucleotide binding; P:transcription; P:regulation of transcription; C:nucleus
BB454ONE001070	0
BB454ONE001071	6	C:eukaryotic translation initiation factor 3 complex; F:translation initiation factor activity; C:cytosol; P:phagocytosis, engulfment; C:ribosome; P:regulation of translational initiation
BB454ONE001072	5	P:cellular process; F:binding; F:metalloendopeptidase activity; P:protein catabolic process; C:cell part
BB454ONE001073	11	C:nucleoplasm; P:regulation of RNA splicing; P:phagocytosis, engulfment; P:chromatin silencing; P:maintenance of protein location in nucleus; P:carbohydrate metabolic process; F:poly(ADP-ribose) glycohydrolase activity; P:response to heat; F:chromatin bin
BB454ONE001075	7	C:cytoplasm; F:protein dimerization activity; F:aminoacylase activity; P:cellular amino acid metabolic process; P:proteolysis; F:metallopeptidase activity; P:urea cycle intermediate metabolic process
BB454ONE001077	3	C:integral to membrane; F:choline transmembrane transporter activity; P:choline transport
BB454ONE001078	2	C:membrane; P:spermatogenesis
BB454ONE001079	6	P:mitochondrial fusion; F:GTP binding; C:plasma membrane; C:integral to membrane; C:mitochondrial outer membrane; F:GTPase activity
BB454ONE001080	0
BB454ONE001082	6	C:Golgi membrane; C:endoplasmic reticulum membrane; P:membrane fusion; P:intracellular protein transport; P:ER to Golgi vesicle-mediated transport; F:transporter activity
BB454ONE001083	7	P:carbohydrate transport; C:integral to membrane; F:substrate-specific transmembrane transporter activity; C:membrane; P:transmembrane transport; F:transporter activity; P:transport
BB454ONE001084	6	P:protein folding; C:nuclear heterochromatin; C:chaperonin-containing T-complex; F:ATP binding; F:unfolded protein binding; C:pericentriolar material
BB454ONE001085	3	F:binding; P:metabolic process; F:catalytic activity
BB454ONE001087	0
BB454ONE001090	9	F:ATPase activity, coupled to transmembrane movement of substances; F:transporter activity; C:membrane; P:transport; F:nucleotide binding; F:nucleoside-triphosphatase activity; F:ATP binding; C:ATP-binding cassette (ABC) transporter complex; F:ATPase acti
BB454ONE001091	1	P:lipid metabolic process
BB454ONE001092	5	P:protein complex assembly; C:mitochondrial inner membrane; F:ATPase activity; F:ATP binding; C:integral to membrane
BB454ONE001093	3	F:protein binding; P:transcription from RNA polymerase II promoter; C:intracellular part
BB454ONE001094	6	F:structural constituent of ribosome; C:lipid particle; F:RNA binding; C:small ribosomal subunit; P:translation; P:ribosome biogenesis
BB454ONE001095	4	C:extracellular region; F:chitin binding; F:hydrolase activity, acting on carbon-nitrogen (but not peptide) bonds; P:chitin metabolic process
BB454ONE001096	3	P:proteolysis; F:metallopeptidase activity; F:zinc ion binding
BB454ONE001097	4	C:ribosome; F:structural constituent of ribosome; P:translation; P:ribosome biogenesis
BB454ONE001098	1	F:isomerase activity
BB454ONE001099	3	F:catalytic activity; F:binding; C:lipid particle
BB454ONE001103	2	P:Wnt receptor signaling pathway; F:LRR domain binding
BB454ONE001104	8	F:mRNA binding; C:nucleolus; F:structural constituent of ribosome; P:translational elongation; C:cytosolic small ribosomal subunit; P:negative regulation of RNA splicing; F:protein binding; P:ribosome biogenesis
BB454ONE001106	10	P:microtubule cytoskeleton organization; P:mRNA transport; P:oocyte nucleus migration during oocyte axis specification; P:establishment of pole plasm mRNA localization; F:SUMO binding; P:regulation of pole plasm oskar mRNA localization; C:exon-exon juncti
BB454ONE001107	9	P:locomotion involved in locomotory behavior; P:startle response; P:brain morphogenesis; F:protein binding; P:antimicrobial humoral response; P:axon midline choice point recognition; F:RNA polymerase II transcription factor activity; C:transcription facto
BB454ONE001108	3	F:binding; C:cytoplasm; C:cytoskeleton
BB454ONE001109	8	F:sequence-specific DNA binding; F:steroid hormone receptor activity; F:transcription factor activity; F:steroid binding; F:zinc ion binding; P:regulation of transcription, DNA-dependent; P:signal transduction; C:transcription factor complex
BB454ONE001111	6	F:structural constituent of ribosome; F:RNA binding; F:protein binding; C:cytosolic large ribosomal subunit; P:translational elongation; P:ribosome biogenesis
BB454ONE001112	1	F:catalytic activity
BB454ONE001113	3	F:binding; P:metabolic process; F:catalytic activity
BB454ONE001114	2	C:lipid particle; F:transferase activity
BB454ONE001116	0
BB454ONE001117	1	C:intracellular part
BB454ONE001118	2	P:steroid metabolic process; P:lipid transport
BB454ONE001120	1	F:growth factor activity
BB454ONE001121	5	F:hydrolase activity; F:bis(5'-nucleosyl)-tetraphosphatase (asymmetrical) activity; P:biological_process; F:bis(5'-nucleosyl)-tetraphosphatase activity; C:cellular_component
BB454ONE001122	3	C:chromatin; F:protein binding; C:nucleus
BB454ONE001123	6	F:microtubule binding; F:myosin heavy chain kinase activity; C:tubulin complex; P:serine family amino acid metabolic process; P:phosphorylation; C:myosin complex
BB454ONE001125	5	P:nucleotide-excision repair; F:endonuclease activity; P:telomere maintenance; F:exonuclease activity; P:G2/M transition DNA damage checkpoint
BB454ONE001127	5	P:cell differentiation; C:lysosome; P:multicellular organismal development; F:cysteine-type endopeptidase activity; P:proteolysis
BB454ONE001128	2	F:binding; F:transferase activity
BB454ONE001130	6	F:NAD or NADH binding; C:mitochondrial matrix; P:oxidation reduction; F:magnesium ion binding; P:tricarboxylic acid cycle; F:isocitrate dehydrogenase (NAD+) activity
BB454ONE001132	8	P:photosynthesis, light harvesting; C:photosystem II; F:magnesium ion binding; P:protein-chromophore linkage; F:chlorophyll binding; C:integral to membrane; C:chloroplast; C:photosystem I
BB454ONE001134	13	C:cytosol; F:peptide binding; P:Wnt receptor signaling pathway; F:protein serine/threonine kinase activity; C:soluble fraction; C:nucleolus; F:glycoprotein binding; P:cell morphogenesis; F:ATP binding; F:magnesium ion binding; F:phosphoprotein binding; P:
BB454ONE001135	2	F:molecular_function; P:biological_process
BB454ONE001136	5	F:protein tyrosine/serine/threonine phosphatase activity; P:protein amino acid dephosphorylation; P:positive regulation of cell migration; F:prenylated protein tyrosine phosphatase activity; P:tyrosine metabolic process
BB454ONE001139	14	P:fatty acid biosynthetic process; P:pyruvate metabolic process; C:lipid particle; P:mitotic spindle organization; F:acetyl-CoA C-acetyltransferase activity; C:mitochondrion; P:isoleucine catabolic process; P:leucine catabolic process; P:lysine catabolic
BB454ONE001140	14	F:protein binding; C:sarcoplasmic reticulum; P:calcium ion transport; F:calcium ion binding; C:integral to membrane; C:endoplasmic reticulum membrane; P:ATP biosynthetic process; C:nuclear envelope; P:regulation of sequestering of calcium ion; F:magnesium
BB454ONE001142	4	F:diazepam binding; P:cellular acyl-CoA homeostasis; F:enzyme inhibitor activity; F:acyl-CoA binding
BB454ONE001143	0
BB454ONE001144	1	C:cytoplasm
BB454ONE001146	0
BB454ONE001147	5	F:uroporphyrinogen decarboxylase activity; P:heme biosynthetic process; P:uroporphyrinogen III metabolic process; C:cytosol; P:chlorophyll metabolic process
BB454ONE001148	6	P:mitotic spindle elongation; F:endopeptidase activity; C:dendrite; C:proteasome regulatory particle, lid subcomplex; P:cell proliferation; P:ubiquitin-dependent protein catabolic process
BB454ONE001152	2	F:binding; C:proteasome complex
BB454ONE001154	4	C:ribosome; F:structural constituent of ribosome; P:translation; P:ribosome biogenesis
BB454ONE001158	3	P:ciliary or flagellar motility; F:calcium ion binding; C:flagellin-based flagellum
BB454ONE001159	0
BB454ONE001160	7	F:metal ion binding; P:oxidation reduction; F:electron carrier activity; F:oxidoreductase activity; F:heme binding; F:iron ion binding; F:monooxygenase activity
BB454ONE001164	9	F:cytochrome-c oxidase activity; C:mitochondrial respiratory chain; P:aerobic respiration; P:spinal cord motor neuron differentiation; P:embryonic organ development; P:respiratory chain complex IV assembly; P:mitochondrial electron transport, cytochrome c
BB454ONE001165	7	F:double-stranded DNA binding; P:regulation of transcription from RNA polymerase II promoter; C:transcription elongation factor complex; F:protein binding; P:RNA elongation from RNA polymerase II promoter; F:RNA polymerase II transcription elongation fact
BB454ONE001166	5	C:mitochondrial inner membrane; F:protein transporter activity; C:integral to membrane; P:protein insertion into membrane; P:protein transport
BB454ONE001168	0
BB454ONE001169	0
BB454ONE001171	9	P:central nervous system development; P:head involution; F:ecdysone 20-monooxygenase activity; C:mitochondrion; P:dorsal closure; P:ecdysteroid biosynthetic process; P:midgut development; P:growth of a germarium-derived egg chamber; F:iron ion binding
BB454ONE001172	11	P:positive regulation of mitotic cell cycle; P:ubiquitin-dependent protein catabolic process; P:chromosome condensation; C:SCF ubiquitin ligase complex; F:ligase activity; C:centrosome; F:protein binding; F:kinase activity; C:spindle; P:DNA endoreduplicat
BB454ONE001174	2	P:oxidative phosphorylation; C:mitochondrial respiratory chain complex I
BB454ONE001179	1	F:catalytic activity
BB454ONE001180	2	P:biological_process; C:cellular_component
BB454ONE001181	5	C:nucleoplasm; F:mRNA (guanine-N7-)-methyltransferase activity; P:mRNA capping; F:RNA binding; P:RNA modification
BB454ONE001182	6	C:adherens junction; C:cell-substrate junction; F:protein binding; F:hydrolase activity; P:cellular process; C:intracellular part
BB454ONE001183	2	C:cytoplasm; C:integral to membrane
BB454ONE001184	5	F:structural constituent of ribosome; C:mitochondrial small ribosomal subunit; P:translation; C:mitochondrial large ribosomal subunit; C:ribosome
BB454ONE001187	2	C:intracellular; F:GTP binding
BB454ONE001189	4	F:mRNA binding; F:protein binding; P:transport; C:nuclear lumen
BB454ONE001190	5	F:binding; C:cytoplasm; P:DNA repair; P:response to DNA damage stimulus; C:nucleus
BB454ONE001191	1	F:sugar binding
BB454ONE001193	0
BB454ONE001195	0
BB454ONE001196	4	F:transferase activity; P:metabolic process; F:transferase activity, transferring hexosyl groups; F:transferase activity, transferring glycosyl groups
BB454ONE001199	10	F:NADH dehydrogenase (ubiquinone) activity; C:mitochondrial respiratory chain complex I; F:4 iron, 4 sulfur cluster binding; F:NAD or NADH binding; P:mitochondrial electron transport, NADH to ubiquinone; F:FMN binding; F:iron ion binding; P:ubiquinone bio
BB454ONE001201	1	F:translation elongation factor activity
BB454ONE001203	4	C:cytoplasm; F:identical protein binding; F:zinc ion binding; P:negative regulation of apoptosis
BB454ONE001205	3	C:spliceosome; F:nucleic acid binding; C:snRNP U6
BB454ONE001207	4	C:cytoplasm; P:interspecies interaction between organisms; F:protein binding; C:signalosome
BB454ONE001208	10	C:mitochondrion; P:protein folding; P:protein export from nucleus; P:oxidation reduction; F:2-alkenal reductase activity; C:cell surface; P:anti-apoptosis; F:ATP binding; F:unfolded protein binding; P:response to stress
BB454ONE001209	6	C:mitochondrial large ribosomal subunit; F:structural constituent of ribosome; P:cellular biopolymer metabolic process; P:gene expression; P:primary metabolic process; P:ribosome biogenesis
BB454ONE001210	1	F:methyltransferase activity
BB454ONE001212	1	F:protein binding
BB454ONE001214	0
BB454ONE001217	3	F:protein binding; F:phosphoprotein phosphatase inhibitor activity; C:soluble fraction
BB454ONE001218	9	C:oligosaccharyltransferase complex; P:protein amino acid N-linked glycosylation via asparagine; C:integral to membrane; C:microsome; F:protein binding; P:response to cytokine stimulus; P:T cell activation; P:protein amino acid terminal N-glycosylation; F
BB454ONE001219	1	C:cell part
BB454ONE001221	0
BB454ONE001222	5	P:phosphate metabolic process; F:acylphosphatase activity; P:gluconeogenesis; P:glycolysis; P:benzoate metabolic process
BB454ONE001224	1	C:cell part
BB454ONE001226	6	P:cell redox homeostasis; C:cell cortex; F:electron carrier activity; F:protein disulfide oxidoreductase activity; F:protein binding; P:electron transport
BB454ONE001229	0
BB454ONE001230	0
BB454ONE001236	1	F:protein binding
BB454ONE001240	1	P:transmembrane transport
BB454ONE001245	2	C:Golgi apparatus; F:nucleotide binding
BB454ONE001247	7	F:mRNA 3'-UTR binding; P:RNA modification; C:nucleolus; P:female gamete generation; F:protein binding; F:nuclease activity; C:cytoplasm
BB454ONE001249	1	F:hydrolase activity
BB454ONE001254	3	F:molecular_function; P:biological_process; C:cellular_component
BB454ONE001255	1	F:binding
BB454ONE001256	9	P:transport; P:negative regulation of epidermal growth factor receptor signaling pathway; F:PTB domain binding; P:negative regulation of MAP kinase activity; P:cell aging; P:negative regulation of Ras protein signal transduction; P:negative regulation of
BB454ONE001258	1	F:protein binding
BB454ONE001259	5	C:cytoplasm; F:RNA binding; P:nervous system development; C:membrane; C:nucleus
BB454ONE001260	0
BB454ONE001262	5	C:integral to endoplasmic reticulum membrane; F:P-P-bond-hydrolysis-driven protein transmembrane transporter activity; P:protein targeting to ER; P:transmembrane transport; C:chloroplast envelope
BB454ONE001268	0
BB454ONE001269	1	P:axonogenesis
BB454ONE001272	0
BB454ONE001273	4	F:exonuclease activity; F:protein binding; P:RNA processing; C:intracellular part
BB454ONE001274	1	C:intracellular
BB454ONE001276	2	C:cytoplasm; F:identical protein binding
BB454ONE001278	3	C:ribosome; C:nucleolus; P:ribosome biogenesis
BB454ONE001280	2	P:lung development; P:Golgi organization
BB454ONE001283	3	C:cytoskeleton; F:actin binding; P:mesoderm development
BB454ONE001285	5	F:pyridoxal phosphate binding; F:1-aminocyclopropane-1-carboxylate synthase activity; P:biosynthetic process; F:transaminase activity; P:cellular amino acid and derivative metabolic process
BB454ONE001289	0
BB454ONE001293	3	P:karyosome formation; C:nucleus; F:DNA binding
BB454ONE001294	6	P:lipid transport; F:lipid binding; F:lipid transporter activity; P:Wnt receptor signaling pathway; C:extracellular region; P:transport
BB454ONE001296	0
BB454ONE001297	3	F:binding; P:biological_process; C:cellular_component
BB454ONE001298	4	P:anti-apoptosis; F:oligosaccharyl transferase activity; C:plasma membrane; C:oligosaccharyltransferase complex
BB454ONE001299	6	P:oxidation reduction; F:binding; F:oxidoreductase activity; P:metabolic process; F:catalytic activity; C:cellular_component
BB454ONE001300	4	F:hormone activity; P:glucose metabolic process; P:carbohydrate metabolic process; C:extracellular region
BB454ONE001301	2	F:binding; C:nucleus
BB454ONE001303	2	F:protein binding; P:signal transduction
BB454ONE001308	3	C:spliceosome; P:mitotic spindle organization; P:nuclear mRNA splicing, via spliceosome
BB454ONE001314	5	F:kinase activity; C:cytoplasm; F:hydrolase activity; F:protein homodimerization activity; C:nucleus
BB454ONE001317	0
BB454ONE001321	1	P:transport
BB454ONE001322	0
BB454ONE001323	4	P:protein folding; F:transferase activity, transferring glycosyl groups; C:lipid particle; F:isomerase activity
BB454ONE001326	0
BB454ONE001327	1	C:integral to membrane
BB454ONE001328	9	C:phosphopyruvate hydratase complex; C:lipid particle; F:phosphopyruvate hydratase activity; F:magnesium ion binding; P:glycolysis; P:tryptophan biosynthetic process; P:gluconeogenesis; P:tyrosine biosynthetic process; P:L-phenylalanine biosynthetic proce
BB454ONE001329	1	C:mitochondrion
BB454ONE001330	9	P:translational initiation; P:cell growth; C:mitochondrion; F:ribosomal small subunit binding; P:mRNA metabolic process; C:eukaryotic translation initiation factor 3 complex; F:ATP binding; F:ATPase activity; P:negative regulation of neuron apoptosis
BB454ONE001332	6	F:structural constituent of ribosome; F:chromatin binding; C:cytosolic large ribosomal subunit; P:translation; P:ribosome biogenesis; C:chromatin
BB454ONE001333	3	F:unfolded protein binding; P:protein folding; C:prefoldin complex
BB454ONE001335	10	P:dendrite morphogenesis; F:transcription coactivator activity; F:structural constituent of cytoskeleton; P:muscle organ development; C:actin filament; C:brahma complex; P:cytokinesis; P:cytoskeleton organization; C:transcription factor complex; P:positiv
BB454ONE001336	5	C:mitochondrial inner membrane; F:protein transporter activity; C:integral to membrane; P:protein insertion into membrane; P:protein transport
BB454ONE001337	7	F:receptor activity; F:signal transducer activity; F:G-protein coupled receptor activity; C:integral to membrane; P:signal transduction; P:transmembrane transport; P:G-protein coupled receptor protein signaling pathway
BB454ONE001338	1	C:intracellular
BB454ONE001339	5	F:protein binding; C:membrane coat; P:intracellular protein transport; C:viral capsid; P:phagocytosis, engulfment
BB454ONE001340	5	P:axon guidance; P:positive regulation of transcription from RNA polymerase II promoter; F:receptor binding; P:transforming growth factor beta receptor signaling pathway; P:activin receptor signaling pathway
BB454ONE001341	2	P:metabolic process; F:N-acetyltransferase activity
BB454ONE001342	3	F:receptor activity; C:membrane; P:signal transduction
BB454ONE001345	1	F:hydrolase activity
BB454ONE001348	0
BB454ONE001353	8	C:cytoplasm; F:pyruvate carboxylase activity; P:gluconeogenesis; F:ATP binding; F:biotin binding; P:tricarboxylic acid cycle; P:alanine metabolic process; P:aspartate metabolic process
BB454ONE001354	0
BB454ONE001356	11	F:ATPase activity; P:regulation of ARF GTPase activity; F:iron-sulfur cluster binding; F:electron carrier activity; F:ARF GTPase activator activity; F:ATP binding; F:translation initiation factor activity; F:zinc ion binding; P:electron transport; C:ribos
BB454ONE001362	0
BB454ONE001363	0
BB454ONE001365	1	-
BB454ONE001367	0
BB454ONE001368	3	P:ciliary or flagellar motility; F:calcium ion binding; C:flagellin-based flagellum
BB454ONE001372	1	C:lipid particle
BB454ONE001375	2	F:protein binding; C:signalosome
BB454ONE001376	0
BB454ONE001380	0
BB454ONE001381	3	F:peptidase activity; F:ubiquitin thiolesterase activity; P:ubiquitin-dependent protein catabolic process
BB454ONE001383	1	C:nucleus
BB454ONE001386	20	C:cytosol; P:regulation of cell shape; P:post-Golgi vesicle-mediated transport; P:small GTPase mediated signal transduction; C:Golgi membrane; P:retrograde vesicle-mediated transport, Golgi to ER; F:receptor signaling protein activity; P:protein amino aci
BB454ONE001387	9	C:chromatin; P:chromatin modification; P:chromatin assembly or disassembly; P:regulation of transcription; F:chromatin binding; P:multicellular organismal development; F:transcription factor activity; P:transcription from RNA polymerase II promoter; C:tra
BB454ONE001388	3	C:membrane; F:metallopeptidase activity; F:peptidyl-dipeptidase activity
BB454ONE001389	8	F:guanyl-nucleotide exchange factor activity; C:eukaryotic translation initiation factor 2B complex; F:translation initiation factor activity; F:transferase activity; C:cytosol; P:regulation of GTPase activity; C:ribosome; P:regulation of translational in
BB454ONE001392	9	F:RNA binding; P:negative regulation of ubiquitin-protein ligase activity during mitotic cell cycle; F:threonine-type endopeptidase activity; P:anaphase-promoting complex-dependent proteasomal ubiquitin-dependent protein catabolic process; P:positive regu
BB454ONE001393	1	C:ribosome
BB454ONE001396	7	P:mitotic spindle elongation; P:translation; F:structural constituent of ribosome; C:lipid particle; C:cytosolic ribosome; P:negative regulation of neuron apoptosis; P:ribosome biogenesis
BB454ONE001397	1	C:intracellular
BB454ONE001399	5	C:integral to endoplasmic reticulum membrane; F:peptide-aspartate beta-dioxygenase activity; F:binding; P:peptidyl-amino acid modification; P:oxidation reduction
BB454ONE001403	0
BB454ONE001404	17	C:dystrophin-associated glycoprotein complex; P:regulation of short-term neuronal synaptic plasticity; P:positive regulation of specific transcription from RNA polymerase II promoter; P:muscle organ development; P:branch fusion, open tracheal system; F:tr
BB454ONE001406	7	C:cytoplasm; C:nucleolus; F:GTP binding; F:protein binding; P:mitosis; F:ATP binding; P:rRNA processing
BB454ONE001407	1	F:binding
BB454ONE001412	10	P:mitotic spindle elongation; C:eukaryotic 43S preinitiation complex; P:smoothened signaling pathway; F:oxidoreductase activity; F:RNA binding; F:translation initiation factor activity; C:cytosol; P:phagocytosis, engulfment; C:ribosome; P:regulation of tr
BB454ONE001414	2	F:oxidoreductase activity; P:oxidation reduction
BB454ONE001417	15	P:visceral muscle development; F:protein binding; P:neurotransmitter secretion; F:protein transporter activity; P:heart development; P:synaptic vesicle coating; P:regulation of transcription, DNA-dependent; P:midgut development; P:intracellular protein tr
BB454ONE001418	3	P:proteolysis; F:aminopeptidase activity; C:intracellular
BB454ONE001419	4	F:kinase activity; P:maintenance of apical/basal cell polarity; P:neuron maintenance; P:cellular response to DNA damage stimulus
BB454ONE001420	4	F:hydrogen-exporting ATPase activity, phosphorylative mechanism; C:vacuolar proton-transporting V-type ATPase, V1 domain; P:ATP synthesis coupled proton transport; F:proton-transporting ATPase activity, rotational mechanism
BB454ONE001421	5	F:molecular_function; C:integral to membrane; C:membrane; P:biological_process; C:cellular_component
BB454ONE001422	7	P:central nervous system development; P:biological regulation; F:methyl-CpG binding; P:open tracheal system development; C:cytoplasm; P:dendrite morphogenesis; C:nucleus
BB454ONE001423	3	F:nucleic acid binding; F:exonuclease activity; C:intracellular
BB454ONE001424	2	F:monooxygenase activity; F:iron ion binding
BB454ONE001425	5	P:fatty acid biosynthetic process; P:pheromone biosynthetic process; F:stearoyl-CoA 9-desaturase activity; C:lipid particle; P:cuticle hydrocarbon biosynthetic process
BB454ONE001428	0
BB454ONE001431	4	C:cytoplasm; F:binding; C:plasma membrane; P:cellular process
BB454ONE001433	1	C:integral to membrane
BB454ONE001435	11	F:poly-pyrimidine tract binding; F:mRNA binding; P:nuclear export; C:spliceosome; C:snRNP U2; P:regulation of alternative nuclear mRNA splicing, via spliceosome; P:spliceosome assembly; P:mitotic spindle organization; F:nucleotide binding; F:protein heter
BB454ONE001439	0
BB454ONE001445	1	F:structural constituent of cuticle
BB454ONE001446	8	P:determination of adult life span; F:protein binding; P:negative regulation of biological process; P:dendrite morphogenesis; P:protein amino acid deacetylation; P:regulation of transcription; F:NAD-dependent histone deacetylase activity; C:histone deacet
BB454ONE001447	1	C:intracellular
BB454ONE001448	2	F:zinc ion binding; F:protein binding
BB454ONE001449	1	F:catalytic activity
BB454ONE001454	4	F:SH3/SH2 adaptor activity; P:positive regulation of JNK cascade; P:myoblast fusion; P:imaginal disc fusion, thorax closure
BB454ONE001455	6	P:protein folding; C:chaperonin-containing T-complex; P:mitotic spindle organization; F:ATP binding; F:unfolded protein binding; F:ATPase activity, coupled
BB454ONE001456	2	F:zinc ion binding; C:intracellular
BB454ONE001458	2	C:intracellular; P:protein import into nucleus
BB454ONE001459	3	F:transporter activity; C:intracellular; P:transport
BB454ONE001461	0
BB454ONE001462	9	F:protein binding; C:neuromuscular junction; P:dorsal appendage formation; P:positive regulation of antifungal peptide biosynthetic process; P:cellular response to DNA damage stimulus; P:phagocytosis, engulfment; C:cytoplasm; P:nervous system development;
BB454ONE001464	0
BB454ONE001466	4	P:regulation of transcription from RNA polymerase II promoter; P:transcription initiation from RNA polymerase II promoter; C:transcription factor TFIIA complex; F:general RNA polymerase II transcription factor activity
BB454ONE001472	9	F:RNA binding; C:cytoskeleton; C:nuclear speck; P:RNA splicing; F:nucleotide binding; P:mRNA processing; F:transcription coactivator activity; C:transcription factor complex; P:positive regulation of transcription
BB454ONE001487	0
BB454ONE001488	0
BB454ONE001491	8	C:cytoplasm; F:protein tyrosine phosphatase activity; P:terminal region determination; F:rhodopsin kinase activity; F:protein binding; P:protein amino acid dephosphorylation; P:torso signaling pathway; P:tyrosine metabolic process
BB454ONE001495	9	C:cytoplasm; F:binding; F:L-malate dehydrogenase activity; P:malate metabolic process; P:oxidation reduction; P:glycolysis; P:pyruvate metabolic process; P:reductive tricarboxylic acid cycle; P:glyoxylate metabolic process
BB454ONE001496	5	P:mitochondrial electron transport, NADH to ubiquinone; F:NADH dehydrogenase (ubiquinone) activity; P:ubiquinone biosynthetic process; P:sodium ion transport; P:proton transport
BB454ONE001497	5	F:structural constituent of ribosome; C:lipid particle; C:cytosolic small ribosomal subunit; P:translation; P:ribosome biogenesis
BB454ONE001498	0
BB454ONE001499	6	P:mitotic spindle elongation; F:structural constituent of ribosome; C:lipid particle; C:cytosolic small ribosomal subunit; P:translation; P:ribosome biogenesis
BB454ONE001504	3	P:protein metabolic process; C:cell part; F:small conjugating protein ligase activity
BB454ONE001505	1	C:membrane
BB454ONE001506	3	F:binding; P:RNA metabolic process; F:protein binding
BB454ONE001508	4	C:ribosome; F:structural constituent of ribosome; P:translation; P:ribosome biogenesis
BB454ONE001514	2	P:metabolic process; F:catalytic activity
BB454ONE001518	5	F:unfolded protein binding; P:'de novo' protein folding; P:protein folding; F:chaperone binding; C:prefoldin complex
BB454ONE001521	1	F:metal ion binding
BB454ONE001522	9	P:chromatin modification; P:DNA replication; F:transcription repressor activity; P:negative regulation of transcription from RNA polymerase II promoter; C:NuRD complex; F:protein binding; F:histone acetyltransferase activity; C:histone acetyltransferase c
BB454ONE001525	5	C:mitochondrion; P:oxidation reduction; F:oxidoreductase activity; C:mitochondrial inner membrane; C:cellular_component
BB454ONE001526	8	F:GTP binding; F:protein binding; C:organelle membrane; C:intracellular membrane-bounded organelle; C:cytoplasmic part; C:intracellular organelle part; P:small GTPase mediated signal transduction; P:protein transport
BB454ONE001527	2	P:maturation of LSU-rRNA from tricistronic rRNA transcript (SSU-rRNA, 5.8S rRNA, LSU-rRNA); C:PeBoW complex
BB454ONE001529	3	F:phosphopantothenoylcysteine decarboxylase activity; P:coenzyme A biosynthetic process; P:pantothenate biosynthetic process
BB454ONE001531	15	P:transmembrane transport; C:integral to membrane; C:microtubule; F:ATPase activity, coupled to transmembrane movement of substances; C:tubulin complex; P:mitotic spindle organization; P:protein polymerization; P:mitotic cell cycle spindle assembly checkp
BB454ONE001532	13	C:small nuclear ribonucleoprotein complex; C:cytosol; P:central nervous system development; C:spliceosome; F:nucleic acid binding; C:nucleolus; P:muscle organ development; P:mitotic spindle organization; F:enzyme binding; P:spliceosomal snRNP biogenesis;
BB454ONE001535	0
BB454ONE001536	3	F:molecular_function; P:biological_process; C:cellular_component
BB454ONE001537	0
BB454ONE001543	3	F:sequence-specific DNA binding; C:nucleus; P:regulation of transcription, DNA-dependent
BB454ONE001546	4	F:RNA binding; F:hydrolase activity; C:nucleus; P:nuclear mRNA splicing, via spliceosome
BB454ONE001547	5	C:snRNP U2; P:regulation of alternative nuclear mRNA splicing, via spliceosome; C:spliceosome; P:mitotic spindle organization; F:RNA binding
BB454ONE001550	3	P:ATP synthesis coupled proton transport; F:hydrogen ion transmembrane transporter activity; C:proton-transporting two-sector ATPase complex, proton-transporting domain
BB454ONE001552	3	P:peptidoglycan catabolic process; F:protein binding; F:N-acetylmuramoyl-L-alanine amidase activity
BB454ONE001553	3	F:monooxygenase activity; F:iron ion binding; C:membrane
BB454ONE001555	1	F:hydrolase activity
BB454ONE001557	4	F:structural constituent of ribosome; C:large ribosomal subunit; P:translation; P:ribosome biogenesis
BB454ONE001560	1	C:membrane
BB454ONE001562	2	C:integral to membrane; C:membrane
BB454ONE001565	8	F:phenylalanine-tRNA ligase activity; C:phenylalanine-tRNA ligase complex; F:ATP binding; P:phenylalanyl-tRNA aminoacylation; F:tRNA binding; P:tryptophan biosynthetic process; P:tyrosine biosynthetic process; P:L-phenylalanine biosynthetic process
BB454ONE001567	7	P:synaptic vesicle exocytosis; C:integral to membrane; P:post-Golgi vesicle-mediated transport; C:endosome; F:protein binding; C:SNARE complex; C:Golgi apparatus
BB454ONE001569	5	P:dendrite morphogenesis; P:microtubule-based movement; C:dynein complex; P:mushroom body development; F:ATPase activity, coupled
BB454ONE001573	7	F:binding; P:determination of adult life span; F:hydrogen-exporting ATPase activity, phosphorylative mechanism; C:vacuolar proton-transporting V-type ATPase, V1 domain; P:ATP synthesis coupled proton transport; F:proton-transporting ATPase activity, rotat
BB454ONE001574	3	C:mitochondrial small ribosomal subunit; F:structural constituent of ribosome; P:ribosome biogenesis
BB454ONE001578	0
BB454ONE001579	3	C:nucleolus; F:RNA binding; C:cytosolic large ribosomal subunit
BB454ONE001580	7	C:cytoplasm; F:endopeptidase activity; C:proteasome regulatory particle; F:ATP binding; F:nucleoside-triphosphatase activity; P:proteolysis; C:nucleus
BB454ONE001581	4	F:molecular_function; C:integral to membrane; C:membrane; P:biological_process
BB454ONE001582	4	P:protein amino acid glycosylation in endoplasmic reticulum; C:endoplasmic reticulum lumen; P:negative regulation of Notch signaling pathway; F:glycogenin glucosyltransferase activity
BB454ONE001583	2	F:protein binding; F:hydrolase activity
BB454ONE001586	1	F:catalytic activity
BB454ONE001587	5	C:ribosome; F:structural constituent of ribosome; F:RNA binding; P:translation; P:ribosome biogenesis
BB454ONE001590	0
BB454ONE001592	3	C:spliceosome; P:mitotic spindle organization; P:nuclear mRNA splicing, via spliceosome
BB454ONE001593	6	C:voltage-gated potassium channel complex; F:voltage-gated potassium channel activity; F:protein binding; P:locomotion; P:embryonic development ending in birth or egg hatching; P:potassium ion transport
BB454ONE001594	7	F:binding; F:acyltransferase activity; P:acetyl-CoA biosynthetic process from pyruvate; F:pyruvate dehydrogenase activity; C:lipid particle; P:acyl-carrier-protein biosynthetic process; C:pyruvate dehydrogenase complex
BB454ONE001598	1	C:cell part
BB454ONE001600	2	F:hydrolase activity; C:mitochondrion
BB454ONE001605	3	P:protein folding; C:prefoldin complex; F:unfolded protein binding
BB454ONE001606	3	F:RNA binding; F:hydrolase activity; F:ubiquitin thiolesterase activity
BB454ONE001607	11	C:mitochondrial respiratory chain; F:NAD(P)+ transhydrogenase (AB-specific) activity; C:integral to membrane; P:oxidation reduction; P:tricarboxylic acid cycle; F:NAD or NADH binding; F:NAD(P)+ transhydrogenase (B-specific) activity; F:NADP or NADPH bindi
BB454ONE001609	38	P:regulation of transcription from RNA polymerase II promoter by nuclear hormone receptor; P:protein amino acid ADP-ribosylation; P:establishment of chromatin silencing; P:DNA repair; F:protein C-terminus binding; P:maintenance of chromatin silencing; P:w
BB454ONE001612	4	F:structural constituent of ribosome; C:intracellular organelle; C:ribosome; P:ribosome biogenesis
BB454ONE001613	0
BB454ONE001614	2	F:4 iron, 4 sulfur cluster binding; P:metabolic process
BB454ONE001617	3	F:peptide deformylase activity; P:translation; F:iron ion binding
BB454ONE001619	4	C:mitochondrial ribosome; F:structural constituent of ribosome; P:translation; P:ribosome biogenesis
BB454ONE001622	2	F:2 iron, 2 sulfur cluster binding; C:intracellular membrane-bounded organelle
BB454ONE001625	5	C:cohesin complex; F:DNA binding; P:sister chromatid cohesion; F:protein binding; F:ATP binding
BB454ONE001626	5	F:electron carrier activity; P:metabolic process; F:catalytic activity; C:membrane; F:NADH dehydrogenase (ubiquinone) activity
BB454ONE001628	3	F:zinc ion binding; F:ubiquitin-protein ligase activity; F:protein binding
BB454ONE001629	2	F:hydroxymethylbilane synthase activity; P:tetrapyrrole biosynthetic process
BB454ONE001631	0
BB454ONE001634	1	C:mitochondrion
BB454ONE001635	2	P:oxidation reduction; F:cysteamine dioxygenase activity
BB454ONE001636	1	P:transmembrane transport
BB454ONE001637	3	P:metabolic process; F:catalytic activity; F:sulfuric ester hydrolase activity
BB454ONE001642	0
BB454ONE001645	4	F:actin binding; F:calcium-dependent phospholipid binding; F:calcium ion binding; P:wing disc dorsal/ventral pattern formation
BB454ONE001647	1	F:binding
BB454ONE001648	2	C:cytoplasm; F:protein binding
BB454ONE001649	4	F:nucleic acid binding; P:regulation of alternative nuclear mRNA splicing, via spliceosome; C:nucleus; F:nucleotide binding
BB454ONE001654	4	C:membrane; P:transmembrane transport; F:transporter activity; P:transport
BB454ONE001657	0
BB454ONE001661	5	F:nucleic acid binding; C:spliceosome; F:RNA splicing factor activity, transesterification mechanism; P:mitotic spindle organization; P:nuclear mRNA splicing, via spliceosome
BB454ONE001663	8	C:nucleolus; C:sex chromatin; F:DNA binding; F:chromatin binding; F:protein binding; P:multicellular organismal development; C:nuclear body; F:zinc ion binding
BB454ONE001666	1	P:transport
BB454ONE001667	0
BB454ONE001668	2	F:kinase activity; P:biosynthetic process
BB454ONE001669	1	C:extracellular region
BB454ONE001673	4	F:nucleic acid binding; F:RNA binding; F:nucleotide binding; P:RNA processing
BB454ONE001674	5	C:mitochondrial large ribosomal subunit; F:structural constituent of ribosome; P:translation; F:rRNA binding; P:ribosome biogenesis
BB454ONE001675	7	F:general RNA polymerase II transcription factor activity; F:DNA binding; C:transcription factor TFIID complex; F:translation initiation factor activity; P:regulation of transcription from RNA polymerase II promoter; C:ribosome; P:regulation of translatio
BB454ONE001678	0
BB454ONE001680	8	P:modification-dependent protein catabolic process; F:transcription activator activity; F:transcription factor activity; F:zinc ion binding; P:interspecies interaction between organisms; F:protein kinase C binding; P:positive regulation of transcription;
BB454ONE001681	2	C:cytoplasm; P:autophagic vacuole formation
BB454ONE001682	6	P:protein folding; C:extrinsic to membrane; F:FK506 binding; F:protein binding; C:endoplasmic reticulum; F:peptidyl-prolyl cis-trans isomerase activity
BB454ONE001683	3	P:germ cell development; P:programmed cell death; P:localization
BB454ONE001694	1	F:metal ion binding
BB454ONE001698	9	F:inositol or phosphatidylinositol phosphatase activity; C:integral to membrane; F:hydrolase activity; P:signal transduction; C:intracellular; F:inositol-polyphosphate 5-phosphatase activity; C:cytosol; F:phosphatidylinositol-4,5-bisphosphate 5-phosphatas
BB454ONE001712	1	C:nucleus
BB454ONE001716	2	P:metal ion transport; F:metal ion binding
BB454ONE001717	8	F:oxoglutarate dehydrogenase (succinyl-transferring) activity; P:oxidation reduction; P:glycolysis; F:thiamin pyrophosphate binding; P:tricarboxylic acid cycle; P:lysine catabolic process; P:tryptophan metabolic process; C:oxoglutarate dehydrogenase compl
BB454ONE001719	16	P:response to lipid; C:cytosol; F:nucleoside-triphosphatase activity; C:lysosome; P:potassium ion transport; P:intracellular cholesterol transport; F:protein C-terminus binding; P:ATP catabolic process; C:vacuolar membrane; C:late endosome; C:early endoso
BB454ONE001727	1	P:cell proliferation
BB454ONE001732	6	C:Z disc; C:cytoskeleton; P:cell-matrix adhesion; F:actin binding; C:focal adhesion; P:regulation of heart contraction
BB454ONE001734	2	F:zinc ion binding; F:nucleic acid binding
BB454ONE001737	10	F:GTP binding; C:Golgi apparatus; P:cell cycle; C:spindle; F:magnesium ion binding; C:internal side of plasma membrane; C:nucleus; P:small GTPase mediated signal transduction; F:GDP binding; P:cell division
BB454ONE001738	1	C:mitochondrial large ribosomal subunit
BB454ONE001740	9	F:copper ion binding; P:oxidation reduction; C:cytoplasm; P:superoxide metabolic process; F:superoxide dismutase activity; F:peroxidase activity; F:zinc ion binding; F:peroxidase reaction; P:response to oxidative stress
BB454ONE001743	1	F:structural constituent of cuticle
BB454ONE001744	5	C:ribosome; P:embryonic development; F:structural constituent of ribosome; P:translational elongation; P:ribosome biogenesis
BB454ONE001746	4	C:ribosome; F:structural constituent of ribosome; P:translation; P:ribosome biogenesis
BB454ONE001748	1	C:cell part
BB454ONE001750	0
BB454ONE001751	8	P:mitotic spindle elongation; C:nucleolus; F:structural constituent of ribosome; P:translational elongation; F:protein binding; P:ribosomal protein import into nucleus; C:cytosolic large ribosomal subunit; P:ribosome biogenesis
BB454ONE001752	4	C:ribosome; F:structural constituent of ribosome; P:translation; P:ribosome biogenesis
BB454ONE001753	2	F:odorant binding; P:transport
BB454ONE001754	2	F:molecular_function; C:cellular_component
BB454ONE001757	7	P:imaginal disc development; F:selenide, water dikinase activity; F:GTP binding; P:protein modification process; P:selenocysteine biosynthetic process; P:cell proliferation; F:ATP binding
BB454ONE001758	2	F:kinase activity; F:binding
BB454ONE001759	0
BB454ONE001765	7	P:mitotic spindle elongation; P:translational initiation; F:structural constituent of ribosome; C:lipid particle; C:cytosolic small ribosomal subunit; F:rRNA binding; P:ribosome biogenesis
BB454ONE001769	1	C:intracellular part
BB454ONE001777	4	C:ribosome; F:structural constituent of ribosome; P:translation; P:ribosome biogenesis
BB454ONE001779	7	C:mitochondrial intermembrane space; P:copper ion transport; F:enzyme activator activity; F:copper chaperone activity; P:brain development; P:heart development; P:generation of precursor metabolites and energy
BB454ONE001782	6	F:structural constituent of ribosome; C:cytosolic small ribosomal subunit; F:zinc ion binding; P:translation; P:neuron development; P:ribosome biogenesis
BB454ONE001783	0
BB454ONE001786	6	C:clathrin coat of trans-Golgi network vesicle; F:protein binding; P:vesicle-mediated transport; P:intracellular protein transport; F:structural molecule activity; C:clathrin coat of coated pit
BB454ONE001787	0
BB454ONE001788	4	C:extracellular region; F:neuropeptide hormone activity; P:positive regulation of heart contraction; P:neuropeptide signaling pathway
BB454ONE001791	9	F:phenylalanine-tRNA ligase activity; F:RNA binding; F:ATP binding; P:phenylalanyl-tRNA aminoacylation; C:cytosol; P:tryptophan biosynthetic process; P:tyrosine biosynthetic process; P:L-phenylalanine biosynthetic process; C:phenylalanine-tRNA ligase comp
BB454ONE001792	2	C:nucleus; C:Golgi apparatus
BB454ONE001799	2	P:biological_process; C:cellular_component
BB454ONE001801	3	C:mitochondrion; C:integral to membrane; C:membrane
BB454ONE001803	15	C:lysosome; P:adult locomotory behavior; C:axon; C:dendrite; P:cellular protein catabolic process; C:cell soma; C:extracellular space; P:neurotransmitter secretion; P:endocytosis; P:protein depalmitoylation; F:palmitoyl-(protein) hydrolase activity; P:reg
BB454ONE001805	2	P:response to biotic stimulus; P:defense response
BB454ONE001808	0
BB454ONE001812	0
BB454ONE001817	3	F:protein kinase activity; F:nucleotide binding; C:intracellular part
BB454ONE001823	9	F:pyruvate dehydrogenase (acetyl-transferring) activity; P:oxidation reduction; P:glycolysis; C:mitochondrion; P:gluconeogenesis; P:isoleucine biosynthetic process; P:leucine biosynthetic process; P:valine biosynthetic process; C:pyruvate dehydrogenase co
BB454ONE001826	12	F:DNA-directed RNA polymerase activity; F:zinc ion binding; P:regulation of transcription from RNA polymerase I promoter; F:protein kinase activity; P:transcription initiation from RNA polymerase II promoter; C:DNA-directed RNA polymerase II, core complex
BB454ONE001827	3	F:molecular_function; P:biological_process; C:cellular_component
BB454ONE001834	2	F:ATP binding; P:response to stress
BB454ONE001839	15	P:heat shock-mediated polytene chromosome puffing; P:nucleolus organization; P:positive regulation of antibacterial peptide biosynthetic process; P:regulation of RNA splicing; P:regulation of transcription, DNA-dependent; C:nuclear euchromatin; F:transfer
BB454ONE001840	2	P:autophagic cell death; F:catalytic activity
BB454ONE001841	3	P:proteolysis; F:metallocarboxypeptidase activity; F:zinc ion binding
BB454ONE001842	5	C:membrane fraction; C:oligosaccharyltransferase complex; C:integral to membrane; F:dolichyl-diphosphooligosaccharide-protein glycotransferase activity; P:protein amino acid N-linked glycosylation via asparagine
BB454ONE001844	0
BB454ONE001845	7	C:lipid particle; F:formate-tetrahydrofolate ligase activity; F:methenyltetrahydrofolate cyclohydrolase activity; F:ATP binding; P:folic acid and derivative biosynthetic process; P:glyoxylate metabolic process; P:nitrogen compound metabolic process
BB454ONE001846	1	P:axonogenesis
BB454ONE001851	1	P:transcription
BB454ONE001854	4	P:cell redox homeostasis; F:electron carrier activity; F:protein disulfide oxidoreductase activity; P:electron transport
BB454ONE001855	7	F:structural constituent of cytoskeleton; F:calmodulin-dependent protein kinase activity; P:protein amino acid phosphorylation; F:myosin light chain kinase activity; F:nucleotide binding; P:serine family amino acid metabolic process; C:myosin complex
BB454ONE001861	4	P:protein folding; C:chaperonin-containing T-complex; F:ATP binding; F:unfolded protein binding
BB454ONE001862	2	F:identical protein binding; C:histone methyltransferase complex
BB454ONE001863	6	P:nucleotide-excision repair, DNA damage removal; P:DNA replication; P:nucleotide-excision repair, DNA gap filling; C:nucleoplasm; C:cytoplasm; C:DNA replication factor A complex
BB454ONE000070	7	C:cytoplasm; F:guanyl-nucleotide exchange factor activity; C:tubulin complex; P:positive regulation of multicellular organism growth; P:positive regulation of cell size; F:calcium ion binding; P:regulation of GTPase activity
BB454ONE000071	7	C:cytoplasm; F:guanyl-nucleotide exchange factor activity; C:tubulin complex; P:positive regulation of multicellular organism growth; P:positive regulation of cell size; F:calcium ion binding; P:regulation of GTPase activity
BB454ONE000072	7	C:cytoplasm; F:guanyl-nucleotide exchange factor activity; C:tubulin complex; P:positive regulation of multicellular organism growth; P:positive regulation of cell size; F:calcium ion binding; P:regulation of GTPase activity
BB454ONE000073	1	F:structural constituent of cuticle
BB454ONE000074	5	F:structural constituent of ribosome; C:lipid particle; C:cytosolic large ribosomal subunit; P:translational elongation; P:ribosome biogenesis
BB454ONE000075	5	F:structural constituent of ribosome; C:lipid particle; C:cytosolic large ribosomal subunit; P:translational elongation; P:ribosome biogenesis
BB454ONE000076	3	C:ribosome; C:lipid particle; P:translation
BB454ONE000077	20	P:Ras protein signal transduction; P:compound eye photoreceptor cell differentiation; P:oocyte microtubule cytoskeleton polarization; P:protein folding; P:olfactory learning; P:cell proliferation; F:SUMO binding; P:protein stabilization; C:cytoplasm; C:ge
BB454ONE000078	20	P:Ras protein signal transduction; P:compound eye photoreceptor cell differentiation; P:oocyte microtubule cytoskeleton polarization; P:protein folding; P:olfactory learning; P:cell proliferation; F:SUMO binding; P:protein stabilization; C:cytoplasm; C:ge
BB454ONE000079	20	P:Ras protein signal transduction; P:compound eye photoreceptor cell differentiation; P:oocyte microtubule cytoskeleton polarization; P:protein folding; P:olfactory learning; P:cell proliferation; F:SUMO binding; P:protein stabilization; C:cytoplasm; C:ge
BB454ONE000080	20	P:Ras protein signal transduction; P:compound eye photoreceptor cell differentiation; P:oocyte microtubule cytoskeleton polarization; P:protein folding; P:olfactory learning; P:cell proliferation; F:SUMO binding; P:protein stabilization; C:cytoplasm; C:ge
BB454ONE000081	20	P:Ras protein signal transduction; P:compound eye photoreceptor cell differentiation; P:oocyte microtubule cytoskeleton polarization; P:protein folding; P:olfactory learning; P:cell proliferation; F:SUMO binding; P:protein stabilization; C:cytoplasm; C:ge
BB454ONE000082	20	P:Ras protein signal transduction; P:compound eye photoreceptor cell differentiation; P:oocyte microtubule cytoskeleton polarization; P:protein folding; P:olfactory learning; P:cell proliferation; F:SUMO binding; P:protein stabilization; C:cytoplasm; C:ge
BB454ONE000083	0
BB454ONE000084	2	F:molecular_function; C:cellular_component
BB454ONE000085	3	F:molecular_function; P:biological_process; C:cellular_component
BB454ONE000086	4	C:cytoskeleton; C:cytoplasm; F:ATP binding; F:protein binding
BB454ONE000087	4	C:cytoskeleton; C:cytoplasm; F:ATP binding; F:protein binding
BB454ONE000088	4	C:cytoskeleton; C:cytoplasm; F:ATP binding; F:protein binding
BB454ONE000089	4	C:cytoskeleton; C:cytoplasm; F:ATP binding; F:protein binding
BB454ONE000090	1	F:structural constituent of cuticle
BB454ONE000091	1	F:structural constituent of cuticle
BB454ONE000092	1	F:structural constituent of cuticle
BB454ONE000093	1	F:structural constituent of cuticle
BB454ONE000094	1	F:structural constituent of cuticle
BB454ONE000095	1	F:structural constituent of cuticle
BB454ONE000098	0
BB454ONE000099	0
BB454ONE000100	0
BB454ONE000103	7	F:metal ion binding; P:oxidation reduction; F:electron carrier activity; F:oxidoreductase activity; F:heme binding; F:iron ion binding; F:monooxygenase activity
BB454ONE000104	7	F:metal ion binding; P:oxidation reduction; F:electron carrier activity; F:oxidoreductase activity; F:heme binding; F:iron ion binding; F:monooxygenase activity
BB454ONE000105	7	F:metal ion binding; P:oxidation reduction; F:electron carrier activity; F:oxidoreductase activity; F:heme binding; F:iron ion binding; F:monooxygenase activity
BB454ONE000106	7	F:metal ion binding; P:oxidation reduction; F:electron carrier activity; F:oxidoreductase activity; F:heme binding; F:iron ion binding; F:monooxygenase activity
BB454ONE000107	7	F:metal ion binding; P:oxidation reduction; F:electron carrier activity; F:oxidoreductase activity; F:heme binding; F:iron ion binding; F:monooxygenase activity
BB454ONE000108	7	F:metal ion binding; P:oxidation reduction; F:electron carrier activity; F:oxidoreductase activity; F:heme binding; F:iron ion binding; F:monooxygenase activity
BB454ONE000117	0
BB454ONE000118	0
BB454ONE000120	0
BB454ONE000122	7	F:metal ion binding; P:oxidation reduction; F:oxidoreductase activity; F:electron carrier activity; F:heme binding; F:iron ion binding; F:monooxygenase activity
BB454ONE000123	7	F:metal ion binding; P:oxidation reduction; F:oxidoreductase activity; F:electron carrier activity; F:heme binding; F:iron ion binding; F:monooxygenase activity
BB454ONE000124	7	F:metal ion binding; P:oxidation reduction; F:oxidoreductase activity; F:electron carrier activity; F:heme binding; F:iron ion binding; F:monooxygenase activity
BB454ONE000125	1	F:metal ion binding
BB454ONE000126	7	F:metal ion binding; P:oxidation reduction; F:oxidoreductase activity; F:electron carrier activity; F:heme binding; F:iron ion binding; F:monooxygenase activity
BB454ONE000131	2	P:oxidation reduction; C:membrane
BB454ONE000132	2	P:oxidation reduction; C:membrane
BB454ONE000133	4	F:calcium ion binding; F:motor activity; F:ATPase activity, coupled; C:muscle myosin complex
BB454ONE000134	4	F:calcium ion binding; F:motor activity; F:ATPase activity, coupled; C:muscle myosin complex
BB454ONE000135	4	F:calcium ion binding; F:motor activity; F:ATPase activity, coupled; C:muscle myosin complex
BB454ONE000136	1	C:cell part
BB454ONE000137	1	C:cell part
BB454ONE001868	5	C:ribosome; F:structural constituent of ribosome; P:translation; C:mitochondrion; P:ribosome biogenesis
BB454ONE001869	4	C:ribosome; F:structural constituent of ribosome; P:translation; P:ribosome biogenesis
BB454ONE001875	0
BB454ONE001876	3	C:mitochondrial large ribosomal subunit; F:structural constituent of ribosome; P:ribosome biogenesis
BB454ONE001877	6	F:tricarboxylate secondary active transmembrane transporter activity; F:binding; C:mitochondrial inner membrane; P:transmembrane transport; P:salivary gland cell autophagic cell death; C:integral to membrane
BB454ONE001881	4	P:protein-FAD linkage; F:protein binding; P:mitochondrial electron transport, succinate to ubiquinone; C:mitochondrion
BB454ONE001882	7	C:mitochondrion; P:succinyl-CoA pathway; F:succinate-CoA ligase (ADP-forming) activity; F:ATP binding; F:protein binding; P:reductive tricarboxylic acid cycle; C:succinate-CoA ligase complex
BB454ONE001885	1	F:transferase activity
BB454ONE001886	2	P:autophagic cell death; F:catalytic activity
BB454ONE001887	2	P:biological_process; C:cellular_component
BB454ONE001888	8	F:lysozyme activity; P:metabolic process; F:hydrolase activity; F:catalytic activity; F:hydrolase activity, acting on glycosyl bonds; P:cytolysis; P:cell wall macromolecule catabolic process; P:defense response to bacterium
BB454ONE001890	9	F:binding; P:cytoskeletal anchoring at plasma membrane; P:regulation of cell shape; F:signal transducer activity; P:integrin-mediated signaling pathway; C:focal adhesion; P:signal complex assembly; F:non-membrane spanning protein tyrosine kinase activity;
BB454ONE001891	3	F:oxidoreductase activity; P:oxidation reduction; F:binding
BB454ONE001892	8	C:cytoplasm; F:manganese ion binding; P:calcium-mediated signaling; P:cyclic-nucleotide-mediated signaling; F:magnesium ion binding; F:diphosphoinositol-polyphosphate diphosphatase activity; P:regulation of RNA export from nucleus; P:cyclic nucleotide met
BB454ONE001893	7	C:cytoplasm; P:N-acetylglucosamine metabolic process; F:hydrolase activity; P:glucosamine catabolic process; P:generation of precursor metabolites and energy; F:binding; F:glucosamine-6-phosphate deaminase activity
BB454ONE001894	4	P:multi-organism process; C:nucleoplasm; P:metabolic process; C:macromolecular complex
BB454ONE001895	4	C:lysosomal membrane; C:integral to membrane; F:protein binding; P:transport
BB454ONE001896	9	C:cytoplasm; C:soluble fraction; P:positive regulation of oxidoreductase activity; F:superoxide dismutase copper chaperone activity; P:superoxide metabolic process; F:enzyme binding; C:nucleus; P:intracellular copper ion transport; F:copper ion transmembr
BB454ONE001898	6	P:mitotic spindle elongation; F:structural constituent of ribosome; C:cytosolic small ribosomal subunit; P:translation; F:rRNA binding; P:ribosome biogenesis
BB454ONE001900	3	C:mitochondrion; F:dodecenoyl-CoA delta-isomerase activity; P:fatty acid metabolic process
BB454ONE001901	3	F:carbonyl reductase (NADPH) activity; P:leukotriene metabolic process; P:prostaglandin metabolic process
BB454ONE001904	1	C:cell part
BB454ONE001905	5	F:RNA binding; F:protein binding; C:nucleus; P:nuclear mRNA splicing, via spliceosome; F:nucleotide binding
BB454ONE001907	1	F:DNA binding
BB454ONE001908	7	C:cytoplasm; P:protein autoprocessing; F:calcium-dependent cysteine-type endopeptidase activity; F:calcium ion binding; P:cell death; P:proteolysis; P:phagocytosis, engulfment
BB454ONE001909	7	C:cytoplasm; F:protein dimerization activity; F:aminoacylase activity; P:cellular amino acid metabolic process; P:proteolysis; F:metallopeptidase activity; P:urea cycle intermediate metabolic process
BB454ONE001910	2	F:kinase activity; F:binding
BB454ONE001911	6	F:translation elongation factor activity; P:translational readthrough; F:nucleotide binding; F:GTPase activity; C:ribosome; P:regulation of translational elongation
BB454ONE001913	9	P:negative regulation of transcriptional preinitiation complex assembly; P:positive regulation of transcription from RNA polymerase II promoter; F:sequence-specific DNA binding; F:general transcriptional repressor activity; F:transcription activator activ
BB454ONE001914	3	P:regulation of ARF protein signal transduction; F:ARF guanyl-nucleotide exchange factor activity; C:intracellular
BB454ONE001915	0
BB454ONE001916	1	C:nucleus
BB454ONE001919	0
BB454ONE001920	2	F:molecular_function; P:biological_process
BB454ONE001921	0
BB454ONE001923	7	P:carbohydrate transport; F:substrate-specific transmembrane transporter activity; C:integral to membrane; C:membrane; P:transmembrane transport; F:transporter activity; P:transport
BB454ONE001925	12	P:cytoskeletal anchoring at plasma membrane; F:protein serine/threonine kinase activity; P:integrin-mediated signaling pathway; P:cell-matrix adhesion; F:protein tyrosine kinase activity; F:ATP binding; C:focal adhesion; P:regulation of signal transductio
BB454ONE001926	2	C:extracellular matrix; P:cellular process
BB454ONE001927	48	C:cytoplasmic vesicle; F:chaperone binding; P:myelin maintenance in the peripheral nervous system; F:copper ion binding; P:ovarian follicle development; P:muscle maintenance; P:response to hydrogen peroxide; P:myeloid cell homeostasis; P:auditory receptor
BB454ONE001928	2	F:ligase activity; F:zinc ion binding
BB454ONE001929	3	F:receptor activity; P:cell adhesion; C:membrane
BB454ONE001930	4	P:tyrosine catabolic process; F:homogentisate 1,2-dioxygenase activity; P:L-phenylalanine catabolic process; P:styrene catabolic process
BB454ONE001931	0
BB454ONE001933	18	C:polytene chromosome puff; P:cell cycle; P:regulation of cell shape; F:RNA polymerase II carboxy-terminal domain kinase activity; P:response to heat; P:cell division; F:DNA binding; F:positive transcription elongation factor activity; F:ATP binding; P:ce
BB454ONE001934	9	F:iron ion binding; C:integral to membrane; F:L-ascorbic acid binding; C:membrane; F:oxidoreductase activity, acting on paired donors, with incorporation or reduction of molecular oxygen; F:oxidoreductase activity, acting on single donors with incorporati
BB454ONE001935	27	F:RNA polymerase binding; P:transcription initiation from RNA polymerase II promoter; P:regulation of DNA binding; F:histone acetyltransferase activity; C:PCAF complex; F:general RNA polymerase II transcription factor activity; P:embryonic development; P:
BB454ONE001936	7	P:mitochondrial electron transport, NADH to ubiquinone; F:electron carrier activity; F:iron ion binding; C:mitochondrial respiratory chain complex I; F:4 iron, 4 sulfur cluster binding; F:NADH dehydrogenase activity; P:electron transport
BB454ONE001937	1	P:ubiquinone biosynthetic process
BB454ONE001938	0
BB454ONE001940	2	P:cellular process; F:hydrolase activity
BB454ONE001942	2	P:carbohydrate metabolic process; F:phosphotransferase activity, alcohol group as acceptor
BB454ONE001943	1	P:transport
BB454ONE001944	1	F:structural constituent of chitin-based cuticle
BB454ONE001945	1	F:structural constituent of chitin-based cuticle
BB454ONE001947	0
BB454ONE001948	1	P:phagocytosis, engulfment
BB454ONE001949	1	C:integral to membrane
BB454ONE001952	7	P:spermatogenesis; P:modification-dependent protein catabolic process; P:male meiosis; F:ubiquitin-protein ligase activity; P:male courtship behavior; P:regulation of protein metabolic process; P:protein ubiquitination
BB454ONE001953	3	P:acetyl-CoA metabolic process; C:lipid particle; F:transferase activity
BB454ONE001954	14	F:translation initiation factor activity; C:nucleolus; P:regulation of cell cycle; F:metal ion binding; P:protein deneddylation; C:signalosome; C:eukaryotic translation initiation factor 3 complex; F:metallopeptidase activity; F:transcription coactivator
BB454ONE001955	4	P:coenzyme A biosynthetic process; F:ATP binding; F:dephospho-CoA kinase activity; P:pantothenate biosynthetic process
BB454ONE001956	1	F:protein binding
BB454ONE001957	1	C:endoplasmic reticulum lumen
BB454ONE001960	1	F:hydrolase activity
BB454ONE001961	0
BB454ONE001962	2	F:nucleic acid binding; F:nucleotide binding
BB454ONE001965	3	C:cytoplasm; F:identical protein binding; C:intracellular organelle
BB454ONE001968	2	C:mitochondrion; F:NADH dehydrogenase activity
BB454ONE001969	0
BB454ONE001970	22	P:protein amino acid phosphorylation; P:reproduction; P:adaptation of rhodopsin mediated signaling; P:metarhodopsin inactivation; P:establishment of meiotic spindle orientation; P:embryonic development ending in birth or egg hatching; P:centriole replicat
BB454ONE001971	3	F:nucleic acid binding; F:ATP binding; F:ATP-dependent RNA helicase activity
BB454ONE001973	3	F:calcium ion binding; C:membrane; F:protein binding
BB454ONE001974	3	F:rRNA methyltransferase activity; C:mitochondrial nucleoid; P:rRNA modification
BB454ONE001975	4	F:protein binding; C:oligosaccharyltransferase complex; F:oligosaccharyl transferase activity; P:protein amino acid glycosylation
BB454ONE001976	1	P:response to stress
BB454ONE001977	8	F:histone binding; P:positive regulation of transcription from RNA polymerase II promoter; P:primitive hemopoiesis; P:protein homooligomerization; P:nucleosome assembly; C:cytoplasm; F:cyclin binding; C:nucleus
BB454ONE001978	5	P:cell redox homeostasis; F:electron carrier activity; F:protein disulfide oxidoreductase activity; P:glycerol ether metabolic process; P:electron transport
BB454ONE001980	0
BB454ONE001982	0
BB454ONE001983	0
BB454ONE001984	5	P:mitotic spindle elongation; F:structural constituent of ribosome; C:cytosolic large ribosomal subunit; P:translation; P:ribosome biogenesis
BB454ONE001986	8	P:translation; C:mitochondrial large ribosomal subunit; F:peptidyl-prolyl cis-trans isomerase activity; P:protein folding; F:FK506 binding; F:DNA binding; C:nucleus; F:isomerase activity
BB454ONE001987	5	C:integral to membrane; C:membrane; P:transmembrane transport; F:transporter activity; P:transport
BB454ONE001991	0
BB454ONE001992	1	C:lipid particle
BB454ONE001993	5	P:signal transduction; P:cell adhesion; C:proteinaceous extracellular matrix; F:calcium ion binding; P:mesoderm development
BB454ONE001994	2	F:hydroxypyruvate isomerase activity; F:isomerase activity
BB454ONE001995	8	P:nuclear envelope organization; F:metal ion binding; F:metalloexopeptidase activity; C:membrane fraction; C:Golgi apparatus; F:metalloendopeptidase activity; P:prenylated protein catabolic process; C:membrane
BB454ONE001996	3	F:GTP binding; F:nucleotide binding; C:nucleus
BB454ONE001997	3	F:GTP binding; F:nucleotide binding; P:ribosome biogenesis
BB454ONE001998	9	C:Golgi membrane; F:GTP binding; C:cytoplasmic vesicle membrane; F:protein binding; C:early endosome membrane; C:anchored to membrane; C:endoplasmic reticulum; P:small GTPase mediated signal transduction; P:protein transport
BB454ONE001999	5	F:ATP binding; C:cytoskeleton; F:nucleotide binding; F:motor activity; C:myosin complex
BB454ONE002003	1	F:protein binding
BB454ONE002004	4	C:endoplasmic reticulum membrane; F:protein binding; C:integral to membrane; P:ER-associated protein catabolic process
BB454ONE002006	7	P:regulation of protein catabolic process; P:anaphase-promoting complex-dependent proteasomal ubiquitin-dependent protein catabolic process; P:positive regulation of ubiquitin-protein ligase activity during mitotic cell cycle; P:negative regulation of ubi
BB454ONE002007	3	C:intracellular part; C:cell junction; F:protein binding
BB454ONE002010	4	C:intracellular; P:transport; F:retinal binding; F:transporter activity
BB454ONE002011	1	P:lipid metabolic process
BB454ONE002012	10	P:mitotic spindle elongation; C:eukaryotic translation initiation factor 2B complex; P:formation of translation initiation ternary complex; F:GTP binding; C:eukaryotic translation initiation factor 2 complex; F:translation initiation factor activity; C:cy
BB454ONE002014	1	C:mRNA cleavage stimulating factor complex
BB454ONE002015	4	P:cellular process; F:mRNA binding; P:multicellular organismal process; C:cytoplasm
BB454ONE002016	0
BB454ONE002017	1	F:metal ion binding
BB454ONE002018	2	P:negative regulation of translational initiation; F:eukaryotic initiation factor 4E binding
BB454ONE002024	8	F:IMP dehydrogenase activity; P:GMP biosynthetic process; F:potassium ion binding; P:oxidation reduction; P:lymphocyte proliferation; C:cytosol; P:purine base metabolic process; C:mitochondrial inner membrane peptidase complex
BB454ONE002025	5	F:metal ion binding; F:molecular_function; P:biological_process; F:zinc ion binding; C:cellular_component
BB454ONE002026	0
BB454ONE002027	3	C:mitochondrial proton-transporting ATP synthase complex, coupling factor F(o); C:lipid particle; P:proton transport
BB454ONE002029	2	F:actin binding; P:smooth muscle contraction
BB454ONE002030	8	P:regulation of transcription, DNA-dependent; F:calcium ion binding; F:peptidase inhibitor activity; F:zinc ion binding; F:serine-type endopeptidase inhibitor activity; C:extracellular region; F:transcription factor activity; C:nucleus
BB454ONE002031	8	F:metal ion binding; P:oxidation reduction; P:malate metabolic process; F:NAD or NADH binding; F:malate dehydrogenase (oxaloacetate-decarboxylating) (NADP+) activity; P:pyruvate metabolic process; P:tricarboxylic acid cycle; P:carbon utilization
BB454ONE002032	2	F:protein binding; F:kinase activity
BB454ONE002033	2	F:metal ion binding; F:zinc ion binding
BB454ONE002035	7	F:protein binding; P:intracellular signaling cascade; P:positive regulation of cellular process; P:regulation of apoptosis; C:cytoplasmic part; C:nucleus; P:developmental process
BB454ONE002036	7	P:modification-dependent protein catabolic process; F:ATP binding; F:ubiquitin-protein ligase activity; C:integral to membrane; P:regulation of protein metabolic process; C:endoplasmic reticulum; P:protein ubiquitination
BB454ONE002038	9	C:cytosol; P:synaptic vesicle coating; P:post-Golgi vesicle-mediated transport; C:synaptic vesicle; C:clathrin adaptor complex; P:neurotransmitter secretion; F:protein binding; P:intracellular protein transport; C:Golgi apparatus
BB454ONE002039	0
BB454ONE002040	3	F:nucleic acid binding; F:protein binding; C:ribonucleoprotein complex
BB454ONE002042	2	C:nucleolus; F:SUMO binding
BB454ONE002043	5	F:structural constituent of ribosome; C:lipid particle; C:cytosolic small ribosomal subunit; P:translation; P:ribosome biogenesis
BB454ONE002045	1	F:structural constituent of cuticle
BB454ONE002047	1	F:hydrolase activity
BB454ONE002048	1	F:hydrolase activity
BB454ONE002049	4	P:modification-dependent protein catabolic process; P:regulation of protein metabolic process; P:post-translational protein modification; F:small conjugating protein ligase activity
BB454ONE002051	3	C:integral to membrane; C:membrane; P:transmembrane transport
BB454ONE002053	0
BB454ONE002054	5	P:mitochondrial electron transport, cytochrome c to oxygen; C:lipid particle; C:mitochondrial respiratory chain complex IV; F:cytochrome-c oxidase activity; P:proton transport
BB454ONE002055	2	F:hydrolase activity; P:primary metabolic process
BB454ONE002056	6	F:metal ion binding; P:N-terminal protein amino acid modification; F:metalloexopeptidase activity; F:aminopeptidase activity; P:peptidyl-methionine modification; C:mitochondrion
BB454ONE002057	2	P:oviposition; P:positive regulation of growth rate
BB454ONE002058	0
BB454ONE002059	0
BB454ONE002060	3	F:nucleic acid binding; F:helicase activity; F:nucleotide binding
BB454ONE002061	0
BB454ONE002062	9	F:iron ion binding; C:integral to membrane; C:membrane; F:electron carrier activity; P:transport; P:oxidation reduction; F:oxidoreductase activity; P:electron transport chain; F:metal ion binding
BB454ONE002064	1	C:ribosome
BB454ONE002065	16	P:ATP metabolic process; P:oxygen and reactive oxygen species metabolic process; P:apoptosis; F:NADH dehydrogenase (ubiquinone) activity; C:mitochondrial respiratory chain complex I; F:electron carrier activity; P:regulation of mitochondrial membrane pote
BB454ONE002069	20	P:positive regulation of dendrite morphogenesis; C:hemidesmosome; P:embryonic development ending in birth or egg hatching; C:lamellipodium; P:regulation of myosin II filament assembly or disassembly; C:actin filament; P:response to antibiotic; C:cytoplasm
BB454ONE002071	2	F:RNA binding; P:RNA processing
BB454ONE002072	6	P:lipid transport; F:lipid transporter activity; P:carbohydrate transport; C:integral to membrane; C:membrane; P:transport
BB454ONE002073	1	F:catalytic activity
BB454ONE002075	2	C:mitochondrial outer membrane; P:protein targeting to mitochondrion
BB454ONE002076	1	F:gamma-glutamyltransferase activity
BB454ONE002077	3	F:oxidoreductase activity, acting on sulfur group of donors; F:binding; C:intracellular part
BB454ONE002078	5	F:zinc ion binding; P:oxidation reduction; F:L-iditol 2-dehydrogenase activity; P:fructose metabolic process; P:mannose metabolic process
BB454ONE002079	12	F:translation initiation factor activity; P:regulation of transcription from RNA polymerase II promoter; F:zinc ion binding; P:transcription initiation from RNA polymerase II promoter; C:transcription factor complex; F:general RNA polymerase II transcript
BB454ONE002080	0
BB454ONE002081	4	F:xenobiotic-transporting ATPase activity; F:ATP binding; C:integral to membrane; P:multidrug transport
BB454ONE002082	1	C:mitochondrial inner membrane
BB454ONE002083	4	P:cellular process; P:transport; C:clathrin coat; C:endomembrane system
BB454ONE002084	7	P:transmembrane transport; F:zinc ion binding; F:P-P-bond-hydrolysis-driven protein transmembrane transporter activity; C:mitochondrial inner membrane; P:protein import into mitochondrial inner membrane; C:mitochondrial intermembrane space protein transpo
BB454ONE002087	0
BB454ONE002088	9	C:mitochondrial small ribosomal subunit; P:mitochondrion organization; F:structural constituent of ribosome; C:lipid particle; F:chromatin binding; P:cell growth; P:translation; P:ribosome biogenesis; C:chromatin
BB454ONE002091	0
BB454ONE002092	2	F:exopeptidase activity; F:serine-type peptidase activity
BB454ONE002093	3	F:ligase activity; P:metabolic process; F:catalytic activity
BB454ONE002094	5	P:modification-dependent protein catabolic process; F:ATP binding; F:ubiquitin-protein ligase activity; P:regulation of protein metabolic process; P:protein ubiquitination
BB454ONE002095	11	P:regulation of translation; P:mRNA processing; C:nucleus; P:transport; F:nucleic acid binding; F:nucleotide binding; C:cytoplasm; F:RNA binding; C:cellular_component; P:mycelium development; P:mRNA transport
BB454ONE002097	0
BB454ONE002098	7	F:adenyl-nucleotide exchange factor activity; P:protein folding; P:protein import into mitochondrial matrix; F:chaperone binding; C:mitochondrial matrix; F:unfolded protein binding; F:protein homodimerization activity
BB454ONE002099	5	P:cellular biosynthetic process; C:peroxisome; P:lipid biosynthetic process; F:methylmalonyl-CoA decarboxylase activity; P:acyl-CoA metabolic process
BB454ONE002103	3	C:cytoplasm; F:kinase activity; F:structural molecule activity
BB454ONE002104	0
BB454ONE002107	0
BB454ONE002108	1	F:oxidoreductase activity
BB454ONE002109	4	P:cell redox homeostasis; F:electron carrier activity; F:protein disulfide oxidoreductase activity; P:electron transport
BB454ONE002112	2	F:protein binding; C:mitochondrion
BB454ONE002113	0
BB454ONE002114	0
BB454ONE002115	4	F:2 iron, 2 sulfur cluster binding; F:electron carrier activity; F:iron ion binding; P:electron transport
BB454ONE002121	6	F:mRNA binding; C:signal recognition particle; P:negative regulation of translational elongation; F:7S RNA binding; F:protein binding; P:SRP-dependent cotranslational protein targeting to membrane
BB454ONE002123	3	F:molecular_function; F:catalytic activity; C:cellular_component
BB454ONE002124	2	C:endoplasmic reticulum; C:Golgi apparatus
BB454ONE002125	18	C:small nuclear ribonucleoprotein complex; F:mRNA 3'-UTR binding; C:cytosol; P:negative regulation of translation; F:SUMO binding; C:spliceosome; P:nuclear-transcribed mRNA poly(A) tail shortening; C:cytoplasmic mRNA processing body; P:spliceosome assembl
BB454ONE002126	0
BB454ONE002127	8	C:cytoplasm; P:protein ubiquitination; P:ubiquitin-dependent protein catabolic process; F:ATP binding; F:ubiquitin-protein ligase activity; F:enzyme binding; P:regulation of protein metabolic process; C:ubiquitin ligase complex
BB454ONE002128	4	F:ATP-dependent protein binding; P:cellular protein metabolic process; F:protein C-terminus binding; F:catalytic activity
BB454ONE002131	1	F:kinase activity
BB454ONE002133	3	C:cytoplasm; P:hemopoiesis; P:anti-apoptosis
BB454ONE002134	9	C:nucleoplasm; P:spliceosomal snRNP biogenesis; C:spliceosome; F:RNA splicing factor activity, transesterification mechanism; F:RNA binding; F:protein binding; C:small nuclear ribonucleoprotein complex; C:cytosol; P:spliceosome assembly
BB454ONE002137	8	F:pyruvate kinase activity; F:potassium ion binding; F:magnesium ion binding; P:glycolysis; F:nucleotide binding; P:gluconeogenesis; P:purine base metabolic process; P:carbon utilization
BB454ONE002138	11	F:signal transducer activity; P:regulation of oviposition; P:negative regulation of locomotion; P:pronuclear migration; C:heterotrimeric G-protein complex; P:embryonic development; P:signal transduction; F:histone acetyltransferase activity; P:establishme
BB454ONE002140	11	F:iron-sulfur cluster binding; P:regulation of transcription from RNA polymerase II promoter; F:phosphorylase kinase regulator activity; P:photoreceptor cell maintenance; C:transcription elongation factor complex; F:histone acetyltransferase activity; C:c
BB454ONE002141	3	P:SRP-dependent cotranslational protein targeting to membrane; C:signal recognition particle, endoplasmic reticulum targeting; F:7S RNA binding
BB454ONE002143	5	P:mitotic spindle elongation; F:structural constituent of ribosome; C:cytosolic large ribosomal subunit; P:translation; P:ribosome biogenesis
BB454ONE002144	3	P:organ development; P:transcription; P:regulation of cellular process
BB454ONE002145	4	C:mitochondrion; F:molecular_function; P:biological_process; C:cellular_component
BB454ONE002148	5	P:mitochondrial electron transport, NADH to ubiquinone; F:NADH dehydrogenase (ubiquinone) activity; P:ubiquinone biosynthetic process; P:sodium ion transport; P:proton transport
BB454ONE002149	4	C:ribosome; F:structural constituent of ribosome; P:translation; P:ribosome biogenesis
BB454ONE002150	8	P:salivary gland cell autophagic cell death; F:sequence-specific DNA binding; F:transcription factor activity; F:protein heterodimerization activity; F:protein homodimerization activity; F:RNA polymerase II transcription factor activity; C:transcription f
BB454ONE002151	3	F:NAD+ kinase activity; P:nicotinamide metabolic process; P:nicotinate nucleotide metabolic process
BB454ONE002154	2	F:tubulin-tyrosine ligase activity; P:protein modification process
BB454ONE002156	0
BB454ONE002157	8	C:spindle pole; C:spindle microtubule; P:pronuclear migration; C:centrosome; P:microtubule cytoskeleton organization; F:protein binding; P:mitosis; P:protein localization
BB454ONE002158	8	C:cytoplasm; P:fucose metabolic process; P:cell morphogenesis; F:protein binding; P:olfactory learning; C:nucleus; F:zinc ion binding; F:alpha-L-fucosidase activity
BB454ONE002160	2	F:hydrogen ion transmembrane transporter activity; P:proton transport
BB454ONE002161	4	P:endosome to lysosome transport; P:lysosome organization; C:nucleus; P:regulation of receptor recycling
BB454ONE002162	6	P:translation; C:mitochondrial large ribosomal subunit; F:P-P-bond-hydrolysis-driven protein transmembrane transporter activity; C:mitochondrial inner membrane presequence translocase complex; P:intracellular protein transport; C:chloroplast envelope
BB454ONE002163	8	P:oxidation reduction; F:binding; P:metabolic process; F:catalytic activity; F:flavin-containing monooxygenase activity; F:monooxygenase activity; F:NADP or NADPH binding; F:FAD binding
BB454ONE002165	2	F:peptidase activity; P:modification-dependent protein catabolic process
BB454ONE002166	1	F:hydrolase activity
BB454ONE002167	7	F:dihydrolipoyllysine-residue succinyltransferase activity; C:lipid particle; C:mitochondrial oxoglutarate dehydrogenase complex; P:tricarboxylic acid cycle; F:lipoic acid binding; P:lysine catabolic process; P:acyl-carrier-protein biosynthetic process
BB454ONE002169	3	C:nucleoplasm; F:protein binding; C:nucleus
BB454ONE002173	1	C:cell part
BB454ONE002174	4	P:translational elongation; F:translation elongation factor activity; P:translation; C:eukaryotic translation elongation factor 1 complex
BB454ONE002175	0
BB454ONE002176	2	F:transcription elongation regulator activity; P:regulation of transcription
BB454ONE002177	1	C:integral to membrane
BB454ONE002178	0
BB454ONE002182	1	F:transferase activity
BB454ONE002183	6	P:mitotic spindle elongation; C:eukaryotic translation initiation factor 3 complex; P:regulation of translational initiation; F:translation initiation factor activity; C:cytosol; C:ribosome
BB454ONE002184	3	P:mitotic spindle elongation; P:translational initiation; C:cytoplasmic part
BB454ONE002187	0
BB454ONE002188	1	F:hydrolase activity
BB454ONE002191	8	C:membrane; P:mitochondrial electron transport, NADH to ubiquinone; F:electron carrier activity; F:NADH dehydrogenase (ubiquinone) activity; P:electron transport; P:ubiquinone biosynthetic process; P:sodium ion transport; P:proton transport
BB454ONE002193	8	P:rhodopsin mediated signaling pathway; P:CDP-diacylglycerol biosynthetic process; P:terminal branching, open tracheal system; P:phototransduction; F:phosphatidate cytidylyltransferase activity; C:nuclear envelope; C:integral to plasma membrane; C:smooth
BB454ONE002194	14	C:chromatin; F:chromatin binding; F:DNA binding; C:nucleus; F:nucleic acid binding; F:RNA binding; F:RNA-directed DNA polymerase activity; P:chromatin assembly or disassembly; F:zinc ion binding; P:DNA integration; F:aspartic-type endopeptidase activity;
BB454ONE002197	2	F:binding; F:acid phosphatase activity
BB454ONE002198	6	C:cytoplasm; C:nuclear pore; C:nucleoplasm; F:protein binding; P:nucleocytoplasmic transport; P:protein targeting
BB454ONE002199	6	F:binding; C:fatty acid beta-oxidation multienzyme complex; P:fatty acid beta-oxidation; F:long-chain-3-hydroxyacyl-CoA dehydrogenase activity; C:lipid particle; P:fatty acid biosynthetic process
BB454ONE002201	5	P:nucleobase, nucleoside and nucleotide metabolic process; P:cellular biosynthetic process; P:heterocycle metabolic process; F:transferase activity; F:lyase activity
BB454ONE002202	3	C:membrane; C:mitochondrion; P:generation of precursor metabolites and energy
BB454ONE002204	3	F:glycoprotein binding; C:endoplasmic reticulum lumen; P:ER-associated protein catabolic process
BB454ONE002205	4	P:mitochondrial electron transport, NADH to ubiquinone; C:mitochondrial respiratory chain complex I; F:NADH dehydrogenase activity; P:electron transport
BB454ONE002206	6	C:lipid particle; F:4 iron, 4 sulfur cluster binding; F:aconitate hydratase activity; C:mitochondrion; P:reductive tricarboxylic acid cycle; P:glyoxylate metabolic process
BB454ONE002207	1	F:ATP binding
BB454ONE002209	0
BB454ONE002212	9	P:convergent extension involved in organogenesis; P:pancreas development; P:heart development; F:transcription activator activity; P:cell migration involved in gastrulation; C:nucleoplasm; P:convergent extension involved in axis elongation; P:muscle cell
BB454ONE002215	6	F:binding; C:cytoplasm; P:biological_process; F:protein heterodimerization activity; F:protein binding; C:cellular_component
BB454ONE002216	6	P:mitochondrial electron transport, NADH to ubiquinone; F:NAD or NADH binding; F:electron carrier activity; C:mitochondrial respiratory chain complex I; F:NADH dehydrogenase activity; P:electron transport
BB454ONE002217	4	F:structural constituent of ribosome; P:translation; C:ribonucleoprotein complex; C:ribosome
BB454ONE002221	9	C:cytoplasm; P:DNA packaging; P:N-terminal protein amino acid acetylation; F:protein binding; F:peptide alpha-N-acetyltransferase activity; P:internal protein amino acid acetylation; C:nucleus; F:ribosome binding; P:acyl-carrier-protein biosynthetic proce
BB454ONE002222	4	C:ribosome; F:structural constituent of ribosome; P:translation; P:ribosome biogenesis
BB454ONE002224	11	F:protein binding; F:zinc ion binding; P:chitin-based larval cuticle pattern formation; C:COPII vesicle coat; P:intracellular protein transport; P:negative regulation of dendrite morphogenesis; P:Golgi organization; F:GTPase activator activity; C:Golgi st
BB454ONE002226	3	F:oxidoreductase activity; P:positive regulation of growth; P:multicellular organismal development
BB454ONE002227	2	P:metabolic process; F:catalytic activity
BB454ONE002228	2	F:binding; F:heat shock protein binding
BB454ONE002229	7	F:DNA-directed RNA polymerase activity; C:DNA-directed RNA polymerase II, core complex; F:DNA binding; P:transcription from RNA polymerase II promoter; C:nucleolus; P:purine base metabolic process; P:pyrimidine base metabolic process
BB454ONE002230	7	F:ATP binding; P:translation; F:ligase activity; F:transferase activity; F:carbon-nitrogen ligase activity, with glutamine as amido-N-donor; F:nucleotide binding; F:glutaminyl-tRNA synthase (glutamine-hydrolyzing) activity
BB454ONE002231	4	F:neuropeptide receptor activity; P:neuropeptide signaling pathway; P:G-protein signaling, coupled to cyclic nucleotide second messenger; P:synaptic transmission
BB454ONE002232	5	F:structural constituent of ribosome; C:lipid particle; C:cytosolic small ribosomal subunit; P:translation; P:ribosome biogenesis
BB454ONE002236	5	P:ubiquitin-dependent protein catabolic process; F:ATP binding; F:ubiquitin-protein ligase activity; P:regulation of protein metabolic process; P:protein ubiquitination
BB454ONE002238	11	P:mesoderm development; C:Z disc; F:structural constituent of muscle; P:sarcomere organization; C:condensed nuclear chromosome; P:mitotic chromosome condensation; P:sister chromatid cohesion; F:actin binding; P:locomotion; P:muscle attachment; P:myoblast
BB454ONE002240	0
BB454ONE002241	0
BB454ONE002242	11	P:leg segmentation; P:uracil catabolic process; P:leg disc development; F:glutamate decarboxylase activity; P:visual behavior; F:aspartate 1-decarboxylase activity; P:pigmentation during development; P:beta-alanine biosynthetic process; P:aspartate metabo
BB454ONE002243	5	C:transcriptional repressor complex; F:metal ion binding; P:negative regulation of transcription from RNA polymerase II promoter; F:transcription corepressor activity; C:transcription factor complex
BB454ONE002246	9	C:spliceosome; P:regulation of alternative nuclear mRNA splicing, via spliceosome; C:snRNP U6; P:mRNA catabolic process; F:U6 snRNA binding; F:protein kinase binding; C:U4/U6 x U5 tri-snRNP complex; C:cytoplasm; P:assembly of spliceosomal tri-snRNP
BB454ONE002247	2	P:modification-dependent protein catabolic process; F:protein binding
BB454ONE002248	2	F:RNA binding; F:binding
BB454ONE002251	3	F:binding; P:metabolic process; F:catalytic activity
BB454ONE002252	0
BB454ONE002253	2	C:polytene chromosome; P:cellular process
BB454ONE002255	3	P:transmembrane transport; C:integral to membrane; F:binding
BB454ONE002257	1	C:extracellular region
BB454ONE002258	3	F:odorant binding; C:extracellular space; P:transport
BB454ONE002259	6	P:peroxisome organization; C:peroxisome; P:regulation of transcription; F:protein binding; C:membrane part; P:protein transport
BB454ONE002263	4	F:triacylglycerol lipase activity; P:intestinal cholesterol absorption; P:lipid catabolic process; P:glycerolipid metabolic process
BB454ONE002264	10	C:cohesin complex; F:zinc ion binding; C:nucleolus; P:neurogenesis; C:PRC1 complex; P:chromatin silencing; P:sister chromatid cohesion; F:protein binding; P:ovarian follicle cell stalk formation; P:germarium-derived female germ-line cyst encapsulation
BB454ONE002266	6	P:protein amino acid mannosylation; C:integral to endoplasmic reticulum membrane; C:dolichol-phosphate-mannose synthase complex; F:dolichyl-phosphate beta-D-mannosyltransferase activity; F:protein binding; C:alpha-1,6-mannosyltransferase complex
BB454ONE002267	0
BB454ONE002269	4	C:mitochondrial large ribosomal subunit; F:structural constituent of ribosome; P:translation; P:ribosome biogenesis
BB454ONE002271	5	P:homeostatic process; C:mitochondrial inner membrane; C:peroxisome; P:mitochondrial genome maintenance; P:oxygen and reactive oxygen species metabolic process
BB454ONE002273	1	C:integral to membrane
BB454ONE002274	15	P:regulation of cell proliferation; F:transcription corepressor activity; F:histone acetyltransferase activity; P:DNA recombination; P:chromatin silencing; P:regulation of Wnt receptor signaling pathway; C:Ino80 complex; C:NuA4 histone acetyltransferase c
BB454ONE002275	4	C:integral to membrane; F:ATP binding; F:ATPase activity, coupled to transmembrane movement of substances; P:transport
BB454ONE002276	2	F:molecular_function; C:integral to membrane
BB454ONE002277	2	C:integral to membrane; P:apoptosis
BB454ONE002278	6	F:spermidine synthase activity; C:cytosol; P:spermidine biosynthetic process; P:arginine metabolic process; P:proline metabolic process; P:beta-alanine metabolic process
BB454ONE002279	9	F:SUMO binding; F:ATP-dependent RNA helicase activity; C:spliceosome; F:nucleic acid binding; P:regulation of alternative nuclear mRNA splicing, via spliceosome; P:mitotic spindle organization; F:ATP binding; P:mRNA export from nucleus; F:RNA splicing fac
BB454ONE002281	4	P:mitotic spindle elongation; C:cytoplasm; F:RNA binding; P:translation
BB454ONE002282	10	P:translation; C:nucleosome; P:small GTPase mediated signal transduction; F:structural constituent of ribosome; F:DNA binding; P:nucleosome assembly; C:lipid particle; C:cytosolic large ribosomal subunit; F:GTP binding; P:ribosome biogenesis
BB454ONE002283	7	F:adenylate kinase activity; C:mitochondrial intermembrane space; F:ATP binding; C:lipid particle; P:ADP biosynthetic process; P:purine base metabolic process; P:ATP metabolic process
BB454ONE002284	3	F:calcium ion binding; C:proteinaceous extracellular matrix; P:signal transduction
BB454ONE002286	1	F:catalytic activity
BB454ONE002287	1	F:heat shock protein binding
BB454ONE002288	2	F:catalytic activity; P:metabolic process
BB454ONE002290	5	F:transmembrane transporter activity; F:ATPase activity; P:transport; C:membrane; F:nucleotide binding
BB454ONE002291	3	F:receptor activity; P:regulation of protein ubiquitination; P:signal transduction
BB454ONE002292	2	F:nucleic acid binding; F:nucleotide binding
BB454ONE002294	3	C:proton-transporting V-type ATPase complex; P:ion transmembrane transport; P:proton transport
BB454ONE002295	2	C:mitochondrial respiratory chain complex I; F:NADH dehydrogenase activity
BB454ONE002296	3	F:molecular_function; P:biological_process; C:ribosome
BB454ONE002298	4	C:extracellular region; F:chitin binding; F:hydrolase activity, acting on carbon-nitrogen (but not peptide) bonds; P:chitin metabolic process
BB454ONE002299	0
BB454ONE002300	6	F:transcription initiation factor activity; F:nucleic acid binding; P:transcription initiation from RNA polymerase II promoter; F:general RNA polymerase II transcription factor activity; C:transcription factor TFIIF complex; P:regulation of transcription
BB454ONE002301	10	F:nucleoside-triphosphatase activity; P:protein refolding; P:protein targeting to mitochondrion; P:response to heat; F:ATP binding; C:mitochondrial matrix; F:unfolded protein binding; P:'de novo' protein folding; P:protein catabolic process; C:lipid parti
BB454ONE002302	3	F:histone acetyltransferase activity; C:histone acetyltransferase complex; P:acyl-carrier-protein biosynthetic process
BB454ONE002303	3	C:nucleolus; F:RNA binding; C:nucleoplasm
BB454ONE002305	2	F:catalytic activity; C:lipid particle
BB454ONE002306	1	C:lipid particle
BB454ONE002307	0
BB454ONE002308	1	C:integral to membrane
BB454ONE002309	3	P:male courtship behavior; P:circadian rhythm; P:behavioral response to starvation
BB454ONE002310	28	F:identical protein binding; P:response to testosterone stimulus; F:aldehyde dehydrogenase (NAD) activity; P:cellular response to hormone stimulus; C:lipid particle; C:mitochondrial matrix; P:response to nicotine; P:response to hyperoxia; P:response to pr
BB454ONE002311	5	P:protein folding; F:unfolded protein binding; C:cytoplasm; F:ATP binding; P:response to stress
BB454ONE002312	4	C:ribosome; F:structural constituent of ribosome; P:translation; P:ribosome biogenesis
BB454ONE002313	2	F:binding; F:hydrolase activity
BB454ONE002314	6	F:zinc ion binding; P:chromatin silencing; F:protein binding; F:specific RNA polymerase II transcription factor activity; C:transcription factor complex; P:regulation of transcription from RNA polymerase II promoter
BB454ONE002315	4	F:hydrolase activity; P:biological_process; F:protein binding; C:cellular_component
BB454ONE002316	0
BB454ONE002317	4	C:ribosome; F:structural constituent of ribosome; P:translation; P:ribosome biogenesis
BB454ONE002318	3	F:molecular_function; P:biological_process; C:cellular_component
BB454ONE002319	0
BB454ONE002320	1	C:proteasome complex
BB454ONE002321	1	P:phosphatidylserine biosynthetic process
BB454ONE002322	3	F:hydrolase activity; F:protein binding; F:phosphoprotein phosphatase activity
BB454ONE002323	9	F:RNA binding; P:negative regulation of ubiquitin-protein ligase activity during mitotic cell cycle; C:mitochondrion; F:threonine-type endopeptidase activity; P:anaphase-promoting complex-dependent proteasomal ubiquitin-dependent protein catabolic process
BB454ONE002324	2	F:molecular_function; P:biological_process
BB454ONE002325	5	P:purine base biosynthetic process; F:amidophosphoribosyltransferase activity; P:nucleoside metabolic process; P:glutamate metabolic process; P:glutamine metabolic process
BB454ONE002326	5	P:mesoderm development; F:structural constituent of muscle; P:myofibril assembly; F:motor activity; C:striated muscle thick filament
BB454ONE002327	0
BB454ONE002328	7	P:carbohydrate transport; F:substrate-specific transmembrane transporter activity; C:integral to membrane; C:membrane; P:transmembrane transport; F:transporter activity; P:transport
BB454ONE002330	0
BB454ONE002331	2	F:binding; F:zinc ion binding
BB454ONE002332	3	F:proteasome inhibitor activity; C:proteasome complex; P:cellular response to DNA damage stimulus
BB454ONE002333	24	F:aldehyde dehydrogenase (NAD) activity; P:oxidation reduction; F:L-aminoadipate-semialdehyde dehydrogenase activity; P:cellular aldehyde metabolic process; C:mitochondrion; P:sensory perception of sound; P:gluconeogenesis; P:glycolysis; P:arginine metabo
BB454ONE002334	9	F:poly(ADP-ribose) glycohydrolase activity; C:nucleus; F:hydrolase activity; C:cytoplasm; F:molecular_function; C:cellular_component; F:metal ion binding; F:magnesium ion binding; P:biological_process
BB454ONE002335	14	P:small GTPase mediated signal transduction; F:sphingomyelin phosphodiesterase activity; C:endocytic vesicle; C:endosome; C:melanosome; F:protein binding; F:GTPase activity; P:regulation of endocytosis; C:anchored to membrane; P:endosome organization; P:p
BB454ONE002336	2	F:molecular_function; P:biological_process
BB454ONE002338	0
BB454ONE002340	4	C:ribosome; F:structural constituent of ribosome; P:translation; P:ribosome biogenesis
BB454ONE002341	3	C:cytosol; F:riboflavin kinase activity; P:riboflavin biosynthetic process
BB454ONE002342	0
BB454ONE002344	2	P:transmembrane transport; F:protein binding
BB454ONE002346	5	C:proteasome complex; P:biological_process; P:immune response; C:nucleus; C:cellular_component
BB454ONE002347	1	F:protein binding
BB454ONE002348	3	F:translation initiation factor activity; C:ribosome; P:regulation of translational initiation
BB454ONE002349	9	F:cysteine-type endopeptidase activity; P:oxidation reduction; F:oxidoreductase activity; C:extracellular region; F:catalytic activity; C:cellular_component; P:proteolysis; P:metabolic process; F:binding
BB454ONE002353	6	P:fatty acid biosynthetic process; F:stearoyl-CoA 9-desaturase activity; F:iron ion binding; P:oxidation reduction; C:integral to membrane; C:endoplasmic reticulum
BB454ONE002354	2	C:mitochondrial respiratory chain complex I; F:NADH dehydrogenase activity
BB454ONE002356	1	C:integral to membrane
BB454ONE002357	1	F:transferase activity, transferring glycosyl groups
BB454ONE002358	3	F:oxidoreductase activity; P:oxidation reduction; F:binding
BB454ONE002359	13	P:positive regulation of fibroblast proliferation; P:oxygen and reactive oxygen species metabolic process; F:NADH dehydrogenase (ubiquinone) activity; C:mitochondrial respiratory chain complex I; P:brain development; P:cAMP-mediated signaling; P:regulatio
BB454ONE002360	1	C:integral to membrane
BB454ONE002362	0
BB454ONE002363	3	F:dUTP diphosphatase activity; P:dUTP metabolic process; P:pyrimidine base metabolic process
BB454ONE002364	5	C:integral to endoplasmic reticulum membrane; C:translocon complex; C:lipid particle; P:cotranslational protein targeting to membrane; C:signal recognition particle, endoplasmic reticulum targeting
BB454ONE002366	5	C:proteasome regulatory particle, lid subcomplex; P:cellular process; P:proteolysis; F:protein binding; F:endopeptidase activity
BB454ONE002367	4	F:RNA binding; C:nucleus; F:nucleotide binding; F:zinc ion binding
BB454ONE002368	3	F:binding; C:intracellular; F:catalytic activity
BB454ONE002369	2	C:cytoskeleton; P:regulation of actin filament polymerization
BB454ONE002370	6	P:protein folding; C:chaperonin-containing T-complex; C:lipid particle; P:mitotic spindle organization; F:ATP binding; F:unfolded protein binding
BB454ONE002371	0
BB454ONE002372	7	P:oxidation reduction; F:binding; F:oxidoreductase activity; P:metabolic process; F:catalytic activity; P:tetrahydrobiopterin biosynthetic process; F:sepiapterin reductase activity
BB454ONE002373	1	P:sterol regulatory element binding protein cleavage
BB454ONE002375	2	F:molecular_function; P:biological_process
BB454ONE002376	1	F:transferase activity, transferring nitrogenous groups
BB454ONE002377	0
BB454ONE002378	1	F:catalytic activity
BB454ONE002379	3	F:protein methyltransferase activity; C:protein complex; P:protein amino acid methylation
BB454ONE002380	1	F:binding
BB454ONE002381	1	F:transferase activity
BB454ONE002382	2	C:membrane part; C:mitochondrion
BB454ONE002383	7	C:cytoplasm; P:anaphase-promoting complex-dependent proteasomal ubiquitin-dependent protein catabolic process; P:negative regulation of ubiquitin-protein ligase activity during mitotic cell cycle; P:positive regulation of ubiquitin-protein ligase activity
BB454ONE002384	2	F:identical protein binding; F:DNA binding
BB454ONE002385	7	F:acyltransferase activity; C:lipid particle; P:fatty acid beta-oxidation; F:long-chain-3-hydroxyacyl-CoA dehydrogenase activity; C:fatty acid beta-oxidation multienzyme complex; P:acyl-carrier-protein biosynthetic process; P:fatty acid biosynthetic proce
BB454ONE002386	3	F:nucleic acid binding; F:exonuclease activity; C:intracellular
BB454ONE002389	1	F:catalytic activity
BB454ONE002390	6	P:cytoskeletal anchoring at plasma membrane; C:focal adhesion; F:calcium ion binding; P:actin cytoskeleton reorganization; F:actin filament binding; P:actin filament bundle formation
BB454ONE002391	1	F:transferase activity
BB454ONE002392	28	P:oxaloacetate metabolic process; P:fatty acid transport; P:aspartate catabolic process; C:protein complex; P:glutamate catabolic process to 2-oxoglutarate; P:aspartate biosynthetic process; F:L-aspartate:2-oxoglutarate aminotransferase activity; C:mitoch
BB454ONE002393	6	F:nucleic acid binding; F:metal ion binding; F:methyltransferase activity; F:transferase activity; F:zinc ion binding; P:methylation
BB454ONE002395	1	C:intracellular
BB454ONE002396	7	P:mitotic spindle elongation; F:SUMO binding; F:structural constituent of ribosome; C:cytosolic large ribosomal subunit; P:translation; F:rRNA binding; P:ribosome biogenesis
BB454ONE002397	1	F:kinase activity
BB454ONE002398	8	C:endosome; C:extrinsic to membrane; F:zinc ion binding; F:phosphoserine phosphatase activity; P:protein transport; P:glycine metabolic process; P:L-serine metabolic process; P:threonine metabolic process
BB454ONE002399	1	F:peptidyl-prolyl cis-trans isomerase activity
BB454ONE002400	0
BB454ONE002403	9	P:mitochondrial electron transport, NADH to ubiquinone; F:quinone binding; F:NADH dehydrogenase (ubiquinone) activity; F:iron ion binding; C:mitochondrial respiratory chain complex I; F:4 iron, 4 sulfur cluster binding; P:ubiquinone biosynthetic process;
BB454ONE002404	5	P:wing disc dorsal/ventral pattern formation; C:intracellular membrane-bounded organelle; P:actin cytoskeleton reorganization; C:centrosome; P:sensory organ precursor cell fate determination
BB454ONE002405	8	P:negative regulation of ubiquitin-protein ligase activity during mitotic cell cycle; F:threonine-type endopeptidase activity; P:anaphase-promoting complex-dependent proteasomal ubiquitin-dependent protein catabolic process; P:positive regulation of ubiqu
BB454ONE002406	7	F:hydrogen-exporting ATPase activity, phosphorylative mechanism; F:hydrogen ion transporting ATP synthase activity, rotational mechanism; C:integral to membrane; P:ATP synthesis coupled proton transport; C:proton-transporting ATP synthase complex, couplin
BB454ONE002407	6	P:regulation of lamellipodium assembly; C:muscle thin filament tropomyosin; P:pole plasm oskar mRNA localization; F:actin binding; P:dendrite morphogenesis; P:muscle contraction
BB454ONE002408	5	P:oxidation reduction; F:binding; F:oxidoreductase activity; P:metabolic process; F:catalytic activity
BB454ONE002409	1	F:binding
BB454ONE002411	3	F:transcription regulator activity; P:regulation of transcription; C:nucleus
BB454ONE002412	6	F:GTP binding; C:plasma membrane; P:peripheral nervous system development; P:small GTPase mediated signal transduction; F:GTPase activity; P:protein transport
BB454ONE002413	14	P:nuclear-transcribed mRNA catabolic process, nonsense-mediated decay; P:oocyte microtubule cytoskeleton polarization; P:cell-cell signaling; P:mRNA export from nucleus; C:nuclear speck; P:mRNA processing; F:SUMO binding; P:pole plasm protein localization
BB454ONE002414	0
BB454ONE002415	5	F:sodium:dicarboxylate symporter activity; C:membrane; P:dicarboxylic acid transport; P:cation transport; P:anion transport
BB454ONE002416	3	C:mitochondrial inner membrane; C:lipid particle; P:proton transport
BB454ONE002417	2	C:nucleolus; P:ribosomal large subunit biogenesis
BB454ONE002419	2	P:nucleobase, nucleoside and nucleotide metabolic process; F:catalytic activity
BB454ONE002420	6	P:oxidation reduction; F:binding; F:oxidoreductase activity; P:metabolic process; F:catalytic activity; F:zinc ion binding
BB454ONE002421	1	F:oxidoreductase activity
BB454ONE002422	7	C:cytoplasm; P:regulation of tube length, open tracheal system; F:chitin binding; C:extracellular region; F:chitin deacetylase activity; P:chitin metabolic process; P:amino sugar metabolic process
BB454ONE002424	0
BB454ONE002426	4	C:mitochondrial large ribosomal subunit; F:structural constituent of ribosome; P:translation; P:ribosome biogenesis
BB454ONE002427	13	F:methylmalonate-semialdehyde dehydrogenase (acylating) activity; F:malonate-semialdehyde dehydrogenase (acetylating) activity; P:oxidation reduction; P:thymine metabolic process; C:mitochondrion; P:inositol metabolic process; P:isoleucine catabolic proce
BB454ONE002429	1	C:integral to membrane
BB454ONE002430	32	P:centrosome cycle; F:manganese ion binding; P:regulation of cell shape; P:response to hydrogen peroxide; P:proteasomal ubiquitin-dependent protein catabolic process; P:cell adhesion; P:response to antibiotic; C:protein phosphatase type 2A complex; P:regu
BB454ONE002432	9	F:microtubule binding; P:mitochondrion transport along microtubule; F:actin filament binding; C:centrosome; P:centrosome organization; F:beta-tubulin binding; C:gamma-tubulin complex; C:nucleus; C:tubulin complex
BB454ONE002433	13	P:nicotinamide riboside catabolic process; F:protein binding; P:response to hydrogen peroxide; C:intracellular membrane-bounded organelle; P:regulation of molecular function; P:cellular response to reactive oxygen species; P:regulation of cellular metabol
BB454ONE002434	3	F:transporter activity; C:intracellular; P:transport
BB454ONE002435	3	F:glycerol kinase activity; P:glycerol-3-phosphate metabolic process; P:glycerolipid metabolic process
BB454ONE002436	3	C:mitochondrial large ribosomal subunit; F:structural constituent of ribosome; P:ribosome biogenesis
BB454ONE002437	5	P:cellular carbohydrate metabolic process; C:mitochondrial matrix; F:citrate (Si)-synthase activity; P:tricarboxylic acid cycle; P:glyoxylate metabolic process
BB454ONE002438	3	P:ubiquinone biosynthetic process; C:mitochondrion; F:methyltransferase activity
BB454ONE002439	0
BB454ONE002441	5	F:translation elongation factor activity; F:GTP binding; F:GTPase activity; C:ribosome; P:regulation of translational elongation
BB454ONE002442	2	P:metabolic process; F:oxidoreductase activity
BB454ONE002443	3	F:molecular_function; C:integral to membrane; P:biological_process
BB454ONE002444	1	F:binding
BB454ONE002445	0
BB454ONE002446	5	F:transferase activity, transferring alkyl or aryl (other than methyl) groups; F:receptor activity; F:di-trans,poly-cis-decaprenylcistransferase activity; F:transferase activity; C:endoplasmic reticulum
BB454ONE002447	4	F:ATPase activity; F:nucleotide binding; F:transporter activity; P:transport
BB454ONE002448	5	P:regulation of meiotic cell cycle; P:response to nutrient; P:mitotic spindle organization; P:water homeostasis; P:oogenesis
BB454ONE002449	10	F:binding; C:lipid particle; F:L-malate dehydrogenase activity; P:malate metabolic process; P:oxidation reduction; P:glycolysis; C:cytosol; P:pyruvate metabolic process; P:reductive tricarboxylic acid cycle; P:glyoxylate metabolic process
BB454ONE002450	5	F:1-pyrroline-5-carboxylate dehydrogenase activity; C:mitochondrial matrix; P:oxidation reduction; P:proline biosynthetic process; P:arginine metabolic process
BB454ONE002451	0
BB454ONE002455	4	F:hydrogen ion transmembrane transporter activity; P:ATP synthesis coupled proton transport; C:proton-transporting two-sector ATPase complex, proton-transporting domain; F:hydrolase activity
BB454ONE002456	4	P:regulation of cell shape; P:cytoskeleton organization; P:ovarian ring canal formation; P:border follicle cell migration
BB454ONE002457	2	F:purine ribonucleotide binding; P:regulation of cellular process
BB454ONE002458	3	F:binding; P:metabolic process; F:catalytic activity
BB454ONE002459	0
BB454ONE002460	2	F:peptidase activity; P:salivary gland cell autophagic cell death
BB454ONE002462	2	P:biological_process; C:cellular_component
BB454ONE002465	1	C:extracellular region
BB454ONE002466	5	P:regulation of cell shape; P:myoblast fusion; F:actin binding; P:cell adhesion; C:contractile fiber
BB454ONE002467	2	C:integral to membrane; C:membrane
BB454ONE002468	3	F:molecular_function; P:biological_process; F:protein binding
BB454ONE002469	4	P:proteolysis; F:serine-type endopeptidase activity; F:catalytic activity; F:peptidase activity
BB454ONE002470	2	F:iron-sulfur cluster binding; C:intracellular membrane-bounded organelle
BB454ONE002471	0
BB454ONE002472	7	P:actin filament depolymerization; P:regulation of lamellipodium assembly; F:ATP binding; F:actin binding; P:signal transduction; P:bristle morphogenesis; C:cytoplasm
BB454ONE002473	1	C:integral to membrane
BB454ONE002474	0
BB454ONE002475	0
BB454ONE002476	12	C:cytosol; C:protein kinase CK2 complex; P:Wnt receptor signaling pathway; P:locomotor rhythm; F:RNA polymerase II carboxy-terminal domain kinase activity; F:ATP binding; P:bristle development; P:lateral inhibition; P:compound eye development; C:nucleus;
BB454ONE002477	11	P:tetrahydrofolate biosynthetic process; P:compound eye pigmentation; F:GTP cyclohydrolase I activity; P:embryonic pattern specification; P:tetrahydrobiopterin biosynthetic process; P:pteridine biosynthetic process; P:cuticle pigmentation; P:preblastoderm
BB454ONE002478	0
BB454ONE002479	1	C:mitochondrion
BB454ONE002480	4	C:ribosome; F:structural constituent of ribosome; P:translation; P:ribosome biogenesis
BB454ONE002481	7	F:growth factor activity; F:actin binding; C:intracellular; P:gliogenesis; P:signal transduction; P:cell proliferation; P:growth
BB454ONE002482	0
BB454ONE002483	4	P:regulation of cellular process; F:peroxiredoxin activity; P:metabolic process; C:mitochondrion
BB454ONE002485	29	P:axon guidance; P:dorsal closure, amnioserosa morphology change; P:regulation of cell shape; F:protein binding; P:transforming growth factor beta receptor signaling pathway; P:cellularization; P:dorsal appendage formation; P:dendrite morphogenesis; C:rha
BB454ONE002486	5	P:oxidation reduction; F:binding; F:oxidoreductase activity; P:metabolic process; F:catalytic activity
BB454ONE002487	6	F:kinase activity; F:peptidase inhibitor activity; C:cytoplasm; F:transferase activity; F:serine-type endopeptidase inhibitor activity; F:protein serine/threonine kinase activity
BB454ONE002488	2	P:muscle organ development; P:regulation of lipid metabolic process
BB454ONE002489	1	F:catalytic activity
BB454ONE002490	2	F:odorant binding; P:transport
BB454ONE002491	8	P:nitrogen fixation; P:iron-sulfur cluster assembly; F:iron-sulfur cluster binding; F:iron ion binding; F:protein complex scaffold; C:nucleus; C:cytosol; C:mitochondrion
BB454ONE002492	7	C:eukaryotic translation initiation factor 4F complex; P:cellular response to DNA damage stimulus; F:ATP-dependent RNA helicase activity; F:ATP binding; F:translation initiation factor activity; C:ribosome; P:regulation of translational initiation
BB454ONE002493	7	C:microsome; P:embryonic development; P:calcium ion homeostasis; F:calcium ion binding; P:post-embryonic development; P:ER overload response; C:endoplasmic reticulum
BB454ONE002494	4	F:endoribonuclease activity; P:rRNA transcription; C:integral to membrane; P:regulation of RNA metabolic process
BB454ONE002495	6	C:cytosol; F:N6-(1,2-dicarboxyethyl)AMP AMP-lyase (fumarate-forming) activity; P:purine ribonucleotide biosynthetic process; P:purine base metabolic process; P:alanine metabolic process; P:aspartate metabolic process
BB454ONE002496	1	P:dsRNA transport
BB454ONE002498	1	C:integral to membrane
BB454ONE002499	9	F:translation initiation factor activity; C:nucleolus; P:integrin-mediated signaling pathway; C:lamin filament; F:ribosome binding; F:protein binding; P:mature ribosome assembly; C:ribosome; P:regulation of translational initiation
BB454ONE002500	3	F:zinc ion binding; C:intracellular; F:protein binding
BB454ONE002502	0
BB454ONE002504	2	F:catalytic activity; C:membrane
BB454ONE002505	0
BB454ONE002506	10	F:transferase activity, transferring acyl groups other than amino-acyl groups; F:phospholipid transporter activity; F:sterol carrier protein X-related thiolase activity; F:oxidoreductase activity; C:lipid particle; C:peroxisome; F:sterol carrier activity;
BB454ONE002507	6	P:mitotic spindle elongation; F:structural constituent of ribosome; C:lipid particle; C:cytosolic large ribosomal subunit; P:translation; P:ribosome biogenesis
BB454ONE002508	0
BB454ONE002510	1	P:RNA processing
BB454ONE002511	0
BB454ONE002512	5	F:ligase activity; F:small protein activating enzyme activity; P:modification-dependent protein catabolic process; P:protein modification process; F:ATP binding
BB454ONE002513	6	F:cation transmembrane transporter activity; P:DNA repair; C:membrane; P:transmembrane transport; P:cation transport; F:DNA binding
BB454ONE002514	1	F:protein binding
BB454ONE002516	1	C:Golgi membrane
BB454ONE002517	2	C:cytoplasmic part; P:vesicle-mediated transport
BB454ONE002518	4	C:lipid particle; P:SRP-dependent cotranslational protein targeting to membrane; C:membrane; P:phagocytosis, engulfment
BB454ONE002519	17	P:muscle thick filament assembly; F:calcium-dependent protein serine/threonine phosphatase activity; P:epithelial to mesenchymal transition; P:neurotransmitter secretion; P:heart development; P:positive regulation of NFAT protein import into nucleus; P:lu
BB454ONE002520	0
BB454ONE002521	1	C:integral to membrane
BB454ONE002523	3	P:metabolic process; F:calcium ion binding; F:catalytic activity
BB454ONE002524	5	F:O-phospho-L-serine:2-oxoglutarate aminotransferase activity; P:L-serine biosynthetic process; P:pyridoxine biosynthetic process; P:glycine metabolic process; P:threonine metabolic process
BB454ONE002525	6	F:GTP binding; C:intracellular; P:germ-line stem cell maintenance; C:plasma membrane; P:small GTPase mediated signal transduction; F:GTPase activity
BB454ONE002527	3	P:lipid transport; F:lipid binding; C:extracellular region
BB454ONE002528	17	C:lysosomal membrane; P:vesicle fusion; C:integral to membrane; P:post-Golgi vesicle-mediated transport; P:calcium ion-dependent exocytosis; P:eosinophil degranulation; P:endosome to lysosome transport; C:late endosome membrane; C:Golgi-associated vesicle
BB454ONE002529	2	F:receptor activity; C:integral to membrane
BB454ONE002530	5	P:interspecies interaction between organisms; C:proteasome complex; F:transferase activity; F:myosin heavy chain kinase activity; F:protein binding
BB454ONE002531	3	C:mitochondrion; C:nucleus; P:mitochondrion morphogenesis
BB454ONE002533	8	C:cytosol; P:hydrogen peroxide catabolic process; C:intracellular membrane-bounded organelle; P:lipid catabolic process; P:cell redox homeostasis; F:thioredoxin peroxidase activity; F:hydrolase activity; F:peroxidase reaction
BB454ONE002534	2	C:mitochondrial respiratory chain complex I; F:NADH dehydrogenase activity
BB454ONE002535	6	F:succinate-CoA ligase (GDP-forming) activity; F:binding; F:ATP citrate synthase activity; C:succinate-CoA ligase complex (GDP-forming); F:succinate-CoA ligase (ADP-forming) activity; P:reductive tricarboxylic acid cycle
BB454ONE002536	5	C:eukaryotic translation initiation factor 3 complex; F:RNA binding; P:regulation of translational initiation; F:translation initiation factor activity; C:ribosome
BB454ONE002538	0
BB454ONE002539	6	P:cell migration; C:peroxisomal membrane; P:nervous system development; P:behavior; P:cellular localization; P:protein transport
BB454ONE002540	11	P:cuticle development; P:head involution; F:P-P-bond-hydrolysis-driven protein transmembrane transporter activity; P:cell death; C:integral to membrane; P:dorsal closure; P:negative regulation of autophagy; P:endoplasmic reticulum unfolded protein respons
BB454ONE002541	4	F:structural constituent of ribosome; C:large ribosomal subunit; P:translation; P:ribosome biogenesis
BB454ONE002542	5	F:serine-type peptidase activity; F:hydrolase activity; C:integral to membrane; C:membrane; F:peptidase activity
BB454ONE002543	3	C:mitochondrial proton-transporting ATP synthase complex, coupling factor F(o); C:lipid particle; P:proton transport
BB454ONE002545	1	F:structural constituent of cuticle
BB454ONE002546	2	F:catalytic activity; P:metabolic process
BB454ONE002547	4	F:methyltransferase activity; P:tRNA methylation; F:tRNA (adenine-N1-)-methyltransferase activity; F:transferase activity
BB454ONE002548	2	C:ribosome; C:endoplasmic reticulum
BB454ONE002551	6	P:oxidation reduction; F:oxidoreductase activity; P:mitochondrial electron transport, NADH to ubiquinone; F:NADH dehydrogenase (ubiquinone) activity; F:NADH dehydrogenase activity; C:mitochondrial inner membrane
BB454ONE002552	12	F:DNA-directed RNA polymerase activity; F:protein kinase activity; P:transcription initiation from RNA polymerase II promoter; C:DNA-directed RNA polymerase II, core complex; F:DNA binding; F:protein binding; P:RNA elongation from RNA polymerase II promot
BB454ONE002553	15	P:melanocyte differentiation; P:reproduction; P:fructose 6-phosphate metabolic process; P:carbohydrate biosynthetic process; P:chondrocyte development; F:glutamine-fructose-6-phosphate transaminase (isomerizing) activity; P:energy reserve metabolic proces
BB454ONE002554	0
BB454ONE002555	20	P:bristle development; C:trans-Golgi network transport vesicle; P:oocyte microtubule cytoskeleton polarization; P:sensory organ precursor cell fate determination; P:cellularization; P:rhabdomere development; F:GTP binding; P:regulation of pole plasm oskar
BB454ONE002556	4	P:lipid metabolic process; F:phospholipase A1 activity; F:hydrolase activity; F:catalytic activity
BB454ONE002557	7	F:translation elongation factor activity; F:GTP binding; C:eukaryotic translation elongation factor 1 complex; C:lipid particle; F:GTPase activity; C:ribosome; P:regulation of translational elongation
BB454ONE002558	2	F:transferase activity; C:cell part
BB454ONE002559	1	F:lipid binding
BB454ONE002561	7	C:endoplasmic reticulum lumen; P:Wnt receptor signaling pathway; C:apical part of cell; P:low-density lipoprotein receptor metabolic process; P:ER to Golgi vesicle-mediated transport; P:oogenesis; P:protein targeting to membrane
BB454ONE002564	2	P:rhodopsin biosynthetic process; F:helicase activity
BB454ONE002566	3	P:transcription; P:regulation of transcription; C:nucleus
BB454ONE002567	1	F:protein binding
BB454ONE002568	3	P:male courtship behavior; P:circadian rhythm; P:behavioral response to starvation
BB454ONE002569	4	F:ATP binding; F:protein serine/threonine kinase activity; P:serine family amino acid metabolic process; P:phosphorylation
BB454ONE002570	3	C:integral to mitochondrial inner membrane; F:molecular_function; P:biological_process
BB454ONE002571	2	P:biological_process; C:cellular_component
BB454ONE002572	7	C:proteasome complex; P:negative regulation of ubiquitin-protein ligase activity during mitotic cell cycle; C:cytoskeleton; P:anaphase-promoting complex-dependent proteasomal ubiquitin-dependent protein catabolic process; P:positive regulation of ubiquiti
BB454ONE002573	1	F:metal ion binding
BB454ONE002574	2	F:oxidoreductase activity; F:iron ion binding
BB454ONE002576	10	P:spermatogenesis; P:protein folding; F:low-density lipoprotein receptor binding; F:heat shock protein binding; P:androgen receptor signaling pathway; P:response to unfolded protein; F:unfolded protein binding; C:membrane; F:zinc ion binding; P:sperm moti
BB454ONE002578	4	P:protein folding; C:endoplasmic reticulum lumen; C:lipid particle; F:protein disulfide isomerase activity
BB454ONE002579	1	C:mitochondrial inner membrane
BB454ONE002580	10	C:cytoplasm; P:protein folding; F:endopeptidase activity; C:proteasome regulatory particle, base subcomplex; P:cellular response to DNA damage stimulus; F:ATPase activity; F:protein binding; F:ATP binding; P:proteolysis; C:male germ cell nucleus
BB454ONE002581	0
BB454ONE002582	0
BB454ONE002583	1	C:cell part
BB454ONE002584	15	P:negative regulation of ubiquitin-protein ligase activity during mitotic cell cycle; F:endopeptidase activity; C:proteasome regulatory particle, base subcomplex; C:nucleolus; F:thyrotropin-releasing hormone receptor binding; P:anaphase-promoting complex-
BB454ONE002585	8	F:GTP binding; C:lipid particle; P:cytokinesis; F:sphingomyelin phosphodiesterase activity; P:phagocytosis, engulfment; P:small GTPase mediated signal transduction; P:protein transport; P:glycosphingolipid metabolic process
BB454ONE002586	3	F:protein binding; C:nucleus; P:RNA processing
BB454ONE002588	6	C:cytoplasm; P:cell differentiation; F:metal ion binding; P:skeletal muscle tissue development; F:protein binding; C:nucleus
BB454ONE002589	1	F:inositol or phosphatidylinositol phosphatase activity
BB454ONE002590	5	C:SAGA complex; F:ligand-dependent nuclear receptor transcription coactivator activity; P:histone deubiquitination; P:positive regulation of transcription, DNA-dependent; C:transcription factor complex
BB454ONE002591	0
BB454ONE002593	9	F:translation initiation factor activity; C:SAGA complex; P:transcription initiation; F:DNA binding; C:transcription factor TFIID complex; F:RNA polymerase II transcription factor activity; C:ribosome; P:regulation of translational initiation; P:regulatio
BB454ONE002594	3	P:proteolysis; F:aminopeptidase activity; C:intracellular
BB454ONE002595	9	P:gurken receptor signaling pathway; P:dorsal appendage formation; P:oocyte dorsal/ventral axis specification; P:bicoid mRNA localization; P:pole plasm oskar mRNA localization; P:dorsal/ventral axis specification, ovarian follicular epithelium; P:ER to Go
BB454ONE002596	5	F:structural constituent of ribosome; F:protein binding; C:cytosolic large ribosomal subunit; P:translation; P:ribosome biogenesis
BB454ONE002597	0
BB454ONE002598	5	F:ubiquitin-specific protease activity; P:modification-dependent protein catabolic process; F:protein binding; F:cysteine-type endopeptidase activity; P:protein deubiquitination
BB454ONE002600	0
BB454ONE002602	20	C:IkappaB kinase complex; P:response to lipopolysaccharide; P:hydrogen peroxide catabolic process; F:protein C-terminus binding; F:protein kinase binding; P:negative regulation of kinase activity; F:caspase inhibitor activity; F:peroxidase activity; P:pos
BB454ONE002604	4	P:protein folding; C:lipid particle; P:cell redox homeostasis; C:endoplasmic reticulum
BB454ONE002605	0
BB454ONE002606	5	F:molecular_function; C:integral to membrane; C:membrane; F:protein binding; C:cellular_component
BB454ONE002607	0
BB454ONE002608	9	C:eukaryotic translation initiation factor 3 complex; F:RNA binding; F:protein binding; P:regulation of translational initiation; F:translation initiation factor activity; C:nucleus; C:cytosol; F:ribosome binding; C:ribosome
BB454ONE002609	4	C:mitochondrial large ribosomal subunit; F:structural constituent of ribosome; P:translation; P:ribosome biogenesis
BB454ONE002610	3	P:oocyte dorsal/ventral axis specification; P:ER to Golgi vesicle-mediated transport; C:endoplasmic reticulum
BB454ONE002611	2	F:cysteine-type peptidase activity; P:proteolysis
BB454ONE002612	1	F:kinase activity
BB454ONE002613	16	C:cytosol; F:translation elongation factor activity; P:ubiquitin-dependent protein catabolic process; P:regulation of transcription from RNA polymerase II promoter; C:transcription elongation factor complex; F:ubiquitin-protein ligase activity; F:protein
BB454ONE002615	3	P:cellular process; F:binding; C:intracellular part
BB454ONE002616	3	P:protein folding; F:peptidyl-prolyl cis-trans isomerase activity; C:nucleus
BB454ONE002618	2	C:mitochondrial respiratory chain complex I; P:oxidative phosphorylation
BB454ONE002619	0
BB454ONE002620	6	P:histone H4 acetylation; F:protein N-terminus binding; P:histone H2A acetylation; P:histone deacetylation; C:NuA4 histone acetyltransferase complex; C:Sin3 complex
BB454ONE002621	3	C:nucleolus; F:ATP-dependent RNA helicase activity; F:ATP binding
BB454ONE002622	4	P:oxidation reduction; F:oxidoreductase activity; P:phagocytosis, engulfment; F:binding
BB454ONE002623	1	F:binding
BB454ONE002625	8	C:cytoplasm; F:fructose 1,6-bisphosphate 1-phosphatase activity; P:fructose metabolic process; P:mannose metabolic process; P:gluconeogenesis; P:glycolysis; P:pentose-phosphate shunt; P:carbon utilization
BB454ONE002627	3	F:cysteine-type endopeptidase inhibitor activity; P:proteolysis; F:cysteine-type endopeptidase activity
BB454ONE002628	3	P:protein folding; C:endoplasmic reticulum; F:peptidyl-prolyl cis-trans isomerase activity
BB454ONE002629	1	F:kinase activity
BB454ONE002630	5	F:hydrogen-exporting ATPase activity, phosphorylative mechanism; C:integral to membrane; P:ATP synthesis coupled proton transport; C:proton-transporting V-type ATPase, V0 domain; P:mitotic spindle organization
BB454ONE002631	38	P:dorsal closure, amnioserosa morphology change; C:membrane; P:germ cell migration; P:Wnt receptor signaling pathway; P:cellularization; P:dendrite morphogenesis; P:branch fusion, open tracheal system; P:dorsal closure, spreading of leading edge cells; F:
BB454ONE002632	3	P:cell redox homeostasis; C:integral to membrane; C:membrane
BB454ONE002633	7	F:NADP or NADPH binding; P:nitric oxide biosynthetic process; P:tetrahydrobiopterin biosynthetic process; F:sepiapterin reductase activity; P:oxidation reduction; F:aldo-keto reductase activity; P:folic acid biosynthetic process
BB454ONE002634	15	F:alpha-ketoacid dehydrogenase activity; F:pyruvate dehydrogenase (acetyl-transferring) activity; P:branched chain family amino acid catabolic process; P:oxidation reduction; P:response to nutrient; F:protein complex binding; P:response to glucocorticoid
BB454ONE002635	10	P:histone H4 acetylation; P:positive regulation of apoptosis; F:zinc ion binding; P:histone H2A acetylation; C:Piccolo NuA4 histone acetyltransferase complex; C:NuA4 histone acetyltransferase complex; F:protein binding; F:histone acetyltransferase activit
BB454ONE002636	3	P:ATP synthesis coupled electron transport; F:NADH dehydrogenase activity; P:electron transport
BB454ONE002638	0
BB454ONE002639	4	C:cytoplasm; P:protein deubiquitination; P:ubiquitin-dependent protein catabolic process; F:ubiquitin thiolesterase activity
BB454ONE002640	7	F:malic enzyme activity; F:metal ion binding; P:oxidation reduction; P:malate metabolic process; F:NAD or NADH binding; F:oxidoreductase activity, acting on the CH-OH group of donors, NAD or NADP as acceptor; P:tricarboxylic acid cycle
BB454ONE002641	6	F:protein tyrosine phosphatase activity; F:RNA binding; C:nucleus; P:RNA processing; P:protein amino acid dephosphorylation; P:tyrosine metabolic process
BB454ONE002643	13	F:microtubule motor activity; P:sperm individualization; P:actin filament bundle formation; F:ATPase activity, coupled; P:imaginal disc-derived wing morphogenesis; C:cytoplasmic dynein complex; P:microtubule-based movement; F:dynein intermediate chain bin
BB454ONE002644	6	F:succinate-CoA ligase (GDP-forming) activity; C:lipid particle; F:ATP binding; F:succinate-CoA ligase (ADP-forming) activity; C:succinate-CoA ligase complex; P:reductive tricarboxylic acid cycle
BB454ONE002645	3	C:extracellular region; F:chitin binding; P:chitin metabolic process
BB454ONE002647	1	F:transferase activity
BB454ONE002648	8	C:cytoskeleton; P:nuclear migration; P:cell proliferation; C:Golgi apparatus; P:response to peptide hormone stimulus; F:protein binding; P:multicellular organismal development; P:cell cycle
BB454ONE002649	4	C:integral to membrane; F:ATP binding; F:ATPase activity, coupled to transmembrane movement of substances; P:transport
BB454ONE002650	4	P:neuropeptide signaling pathway; P:positive regulation of juvenile hormone biosynthetic process; F:neuropeptide hormone activity; C:extracellular region
BB454ONE002651	9	P:positive regulation of transcription; F:translation elongation factor activity; F:chromatin binding; F:zinc ion binding; F:positive transcription elongation factor activity; C:ribosome; P:regulation of translational elongation; C:chromatin; C:transcript
BB454ONE002652	9	P:protein amino acid phosphorylation; C:integral to plasma membrane; P:homophilic cell adhesion; P:calcium-dependent cell-cell adhesion; F:transmembrane receptor protein tyrosine kinase activity; F:protein binding; F:calcium ion binding; F:ATP binding; P:
BB454ONE002653	3	C:lipid particle; P:protein amino acid N-linked glycosylation; F:transferase activity
BB454ONE002654	2	C:mitochondrial large ribosomal subunit; P:translation
BB454ONE002655	1	P:transport
BB454ONE002657	12	P:negative regulation of ubiquitin-protein ligase activity during mitotic cell cycle; P:cell wall macromolecule catabolic process; F:endopeptidase activity; C:proteasome regulatory particle, base subcomplex; P:anaphase-promoting complex-dependent proteaso
BB454ONE002658	1	F:structural constituent of cuticle
BB454ONE002659	1	P:cell cycle arrest
BB454ONE002661	4	F:DNA binding; F:nucleoside-triphosphatase activity; C:nucleus; F:nucleotide binding
BB454ONE002662	2	C:cytoplasm; C:intracellular organelle
BB454ONE002663	2	F:catalytic activity; F:binding
BB454ONE002664	3	F:hydrolase activity, hydrolyzing O-glycosyl compounds; P:autophagic cell death; P:carbohydrate metabolic process
BB454ONE002666	1	F:binding
BB454ONE002667	11	F:zinc ion binding; P:cell-cell signaling; P:skeletal system development; P:negative regulation of cell proliferation; P:negative regulation of transcription from RNA polymerase II promoter; P:positive regulation of cellular process; F:protein binding; F:
BB454ONE002668	12	F:SUMO binding; F:DNA polymerase processivity factor activity; P:mitotic spindle organization; F:DNA binding; P:leading strand elongation; P:mismatch repair; P:antimicrobial humoral response; C:PCNA complex; P:regulation of DNA replication; P:eggshell cho
BB454ONE002669	6	C:nucleoplasm; P:cell proliferation; P:maturation of LSU-rRNA from tricistronic rRNA transcript (SSU-rRNA, 5.8S rRNA, LSU-rRNA); P:maturation of 5.8S rRNA from tricistronic rRNA transcript (SSU-rRNA, 5.8S rRNA, LSU-rRNA); C:PeBoW complex; C:preribosome, l
BB454ONE002670	3	P:rRNA methylation; F:nucleic acid binding; F:methyltransferase activity
BB454ONE002671	3	F:binding; F:protein N-acetylglucosaminyltransferase activity; P:protein amino acid O-linked glycosylation
BB454ONE002672	0
BB454ONE002673	4	F:molecular_function; F:binding; P:biological_process; C:cellular_component
BB454ONE002674	3	C:cytoplasm; F:protein binding; C:signalosome
BB454ONE002676	5	C:intracellular membrane-bounded organelle; C:integral to membrane; C:cytoplasmic part; P:regulation of cellular process; P:transcription
BB454ONE002677	7	P:protein amino acid dephosphorylation; F:signal transducer activity; F:metal ion binding; P:positive regulation of I-kappaB kinase/NF-kappaB cascade; F:protein serine/threonine phosphatase activity; P:positive regulation of transcription, DNA-dependent;
BB454ONE002679	2	C:lipid particle; F:transferase activity, transferring glycosyl groups
BB454ONE002680	8	P:DNA replication; P:cell cycle arrest; P:negative regulation of cell proliferation; F:DNA binding; F:protein binding; P:protein stabilization; C:nucleus; P:nucleolus to nucleoplasm transport
BB454ONE002681	3	P:GPI anchor biosynthetic process; C:cell part; F:transferase activity
BB454ONE002682	5	C:cytoplasm; C:proteasome core complex; P:ubiquitin-dependent protein catabolic process; C:nucleus; F:threonine-type endopeptidase activity
BB454ONE002683	0
BB454ONE002684	0
BB454ONE002685	23	F:specific transcriptional repressor activity; P:negative regulation of hemocyte proliferation; C:outer kinetochore of condensed chromosome; P:negative regulation of lamellocyte differentiation; C:PML body; F:SUMO ligase activity; P:humoral immune respons
BB454ONE002686	13	P:cell motion; F:small GTPase regulator activity; C:nucleolus; P:actin polymerization or depolymerization; P:response to bacterium; P:protein complex assembly; F:protein binding; C:actin cytoskeleton; P:actin nucleation; C:lamellipodium; C:cytoplasm; P:tr
BB454ONE002687	34	F:manganese ion binding; P:regulation of DNA replication; P:response to hydrogen peroxide; P:proteasomal ubiquitin-dependent protein catabolic process; F:protein C-terminus binding; P:response to antibiotic; P:ceramide metabolic process; C:protein phospha
BB454ONE002688	1	C:membrane
BB454ONE002689	1	F:hydrolase activity
BB454ONE002690	0
BB454ONE002691	2	F:receptor activity; C:integral to membrane
BB454ONE002692	40	C:extrinsic to plasma membrane; F:GTP binding; P:inflammatory response; P:regulation of cell migration; P:positive regulation of actin filament polymerization; P:neuromuscular process controlling balance; P:negative regulation of receptor-mediated endocyt
BB454ONE002693	2	F:NADH dehydrogenase activity; P:electron transport
BB454ONE002694	6	F:translation elongation factor activity; F:GTP binding; F:nucleotidyltransferase activity; F:GTPase activity; C:ribosome; P:regulation of translational elongation
BB454ONE002695	1	F:hydrolase activity
BB454ONE002696	1	P:protein amino acid glycosylation
BB454ONE002697	5	P:protein folding; C:endoplasmic reticulum lumen; C:lipid particle; F:protein disulfide isomerase activity; F:transferase activity
BB454ONE002699	5	F:nucleic acid binding; F:RNA binding; C:cytoplasm; F:nucleotide binding; C:nucleus
BB454ONE002700	0
BB454ONE002701	2	P:oxidation reduction; F:oxidoreductase activity
BB454ONE002702	4	P:cellular response to DNA damage stimulus; C:proteasome core complex; P:ubiquitin-dependent protein catabolic process; F:threonine-type endopeptidase activity
BB454ONE002703	2	F:molecular_function; C:cellular_component
BB454ONE002704	4	C:cytoplasmic membrane-bounded vesicle; F:S-formylglutathione hydrolase activity; F:carboxylesterase activity; P:methane metabolic process
BB454ONE002705	9	P:negative regulation of ubiquitin-protein ligase activity during mitotic cell cycle; C:cytoskeleton; F:threonine-type endopeptidase activity; P:anaphase-promoting complex-dependent proteasomal ubiquitin-dependent protein catabolic process; P:positive reg
BB454ONE002706	16	P:positive regulation of viral genome replication; C:tight junction; F:signal transducer activity; F:enzyme binding; C:membrane fraction; P:positive regulation of I-kappaB kinase/NF-kappaB cascade; C:vesicle; P:endoplasmic reticulum unfolded protein respo
BB454ONE002707	2	F:NADH dehydrogenase activity; P:electron transport
BB454ONE002708	8	P:oxidation reduction; F:binding; P:metabolic process; F:catalytic activity; F:flavin-containing monooxygenase activity; F:monooxygenase activity; F:NADP or NADPH binding; F:FAD binding
BB454ONE002709	5	F:RNA binding; F:exonuclease activity; P:RNA processing; F:3'-5'-exoribonuclease activity; F:protein binding
BB454ONE002711	3	F:endopeptidase activity; P:cellular response to DNA damage stimulus; C:proteasome complex
BB454ONE002712	10	F:L-malate dehydrogenase activity; F:binding; C:mitochondrial inner membrane; P:oxidation reduction; P:malate metabolic process; P:glycolysis; C:mitochondrial matrix; P:pyruvate metabolic process; P:reductive tricarboxylic acid cycle; P:glyoxylate metabol
BB454ONE002713	1	C:plasma membrane
BB454ONE002714	2	F:molecular_function; C:cellular_component
BB454ONE002715	22	P:regulation of circadian sleep/wake cycle, sleep; P:protein amino acid phosphorylation; P:cAMP-mediated signaling; P:anterior/posterior pattern formation, imaginal disc; P:oocyte microtubule cytoskeleton polarization; F:protein binding; P:behavioral resp
BB454ONE002716	16	P:cell motion; C:cytosol; F:translation elongation factor activity; C:microtubule; F:MHC class I protein binding; P:natural killer cell mediated cytotoxicity; P:protein polymerization; P:microtubule-based movement; F:GTPase activity; F:unfolded protein bi
BB454ONE002717	4	P:Golgi organization; C:ER-Golgi intermediate compartment; F:protein binding; P:intracellular protein transport
BB454ONE002718	1	P:metabolic process
BB454ONE002719	0
BB454ONE002720	4	C:membrane; P:transmembrane transport; P:metal ion transport; F:metal ion transmembrane transporter activity
BB454ONE002721	3	P:transport; C:membrane; C:mitochondrion
BB454ONE002722	7	P:regulation of growth; F:protein serine/threonine kinase activity; C:microtubule; C:centrosome; C:nuclear envelope; P:protein amino acid phosphorylation; P:serine family amino acid metabolic process
BB454ONE002723	0
BB454ONE002724	6	P:lipid metabolic process; P:intracellular signaling cascade; P:glycerophospholipid metabolic process; F:phosphoric diester hydrolase activity; F:glycosylphosphatidylinositol diacylglycerol-lyase activity; F:phospholipase C activity
BB454ONE002725	7	F:molecular_function; P:intracellular signaling cascade; F:Rho guanyl-nucleotide exchange factor activity; P:biological_process; P:regulation of Rho protein signal transduction; F:guanyl-nucleotide exchange factor activity; C:intracellular
BB454ONE002727	3	P:cellular amino acid metabolic process; F:oxidoreductase activity; P:nervous system development
BB454ONE002728	2	C:integral to membrane; C:membrane
BB454ONE002729	14	C:cytoplasm; F:thioredoxin-disulfide reductase activity; F:NADP or NADPH binding; F:electron carrier activity; P:cell redox homeostasis; F:glutathione-disulfide reductase activity; P:oxidation reduction; P:gastrulation; F:FAD binding; F:protein disulfide
BB454ONE002730	5	C:eukaryotic translation initiation factor 3 complex; P:salivary gland cell autophagic cell death; F:translation initiation factor activity; C:ribosome; P:regulation of translational initiation
BB454ONE002731	4	P:oxidative phosphorylation; F:electron carrier activity; C:lipid particle; P:electron transport
BB454ONE002732	0
BB454ONE002733	0
BB454ONE002734	4	F:actin binding; F:calcium-dependent phospholipid binding; F:calcium ion binding; P:wing disc dorsal/ventral pattern formation
BB454ONE002735	0
BB454ONE002737	4	F:inorganic diphosphatase activity; C:cytoplasm; F:magnesium ion binding; P:oxidative phosphorylation
BB454ONE002738	1	C:peroxisome
BB454ONE002739	4	P:proteolysis; F:aspartic-type endopeptidase activity; F:hydrolase activity; F:peptidase activity
BB454ONE002740	0
BB454ONE002741	1	F:nucleic acid binding
BB454ONE002742	1	F:hydrolase activity
BB454ONE002744	22	P:protein amino acid phosphorylation; F:glycogen synthase kinase 3 activity; P:Notch signaling pathway; P:olfactory learning; P:synaptic growth at neuromuscular junction; P:regulation of proteolysis; P:wing and notum subfield formation; P:heart developmen
BB454ONE002745	5	F:RNA binding; F:GTP binding; F:nucleotide binding; F:nucleoside-triphosphatase activity; C:intracellular
BB454ONE002746	4	P:proteolysis; F:serine-type endopeptidase activity; F:catalytic activity; F:peptidase activity
BB454ONE002747	13	P:eclosion rhythm; F:mRNA binding; P:locomotor rhythm; P:cytoplasmic transport, nurse cell to oocyte; F:zinc ion binding; P:actin cytoskeleton organization; P:embryonic development; F:nucleotide binding; P:locomotion; C:cytoplasm; P:protein localization;
BB454ONE002748	7	P:modification-dependent protein catabolic process; C:UBC13-MMS2 complex; F:protein binding; F:ubiquitin-protein ligase activity; P:regulation of protein metabolic process; C:nucleus; P:protein ubiquitination
BB454ONE002749	12	F:ubiquinol-cytochrome-c reductase activity; F:zinc ion binding; C:mitochondrial respiratory chain complex III; F:metalloendopeptidase activity; P:proteolysis; P:mitochondrial electron transport, ubiquinol to cytochrome c; C:mitochondrial matrix; P:protei
BB454ONE002750	4	F:cytidylate kinase activity; F:ATP binding; F:uridylate kinase activity; P:pyrimidine base metabolic process
BB454ONE002751	3	F:peptidase inhibitor activity; F:serine-type endopeptidase inhibitor activity; C:extracellular region
BB454ONE002752	3	C:integral to membrane; C:membrane; P:transmembrane transport
BB454ONE002753	7	F:NAD or NADH binding; F:glycerol-3-phosphate dehydrogenase (NAD+) activity; P:oxidation reduction; P:glycerol-3-phosphate catabolic process; C:glycerol-3-phosphate dehydrogenase complex; F:protein homodimerization activity; P:glycerolipid metabolic proce
BB454ONE002754	8	P:neurotransmitter receptor metabolic process; P:synaptogenesis; P:glutamine biosynthetic process; F:ATP binding; F:glutamate-ammonia ligase activity; P:glutamate catabolic process; C:cytoplasm; P:peptidoglycan biosynthetic process
BB454ONE002755	1	F:structural constituent of cuticle
BB454ONE002756	4	P:protein lipoylation; F:transferase activity; F:catalytic activity; P:protein modification process
BB454ONE002757	5	C:cytoplasm; P:spermatogenesis; F:protein tyrosine/serine/threonine phosphatase activity; F:protein binding; P:protein amino acid dephosphorylation
BB454ONE002758	6	P:histone methylation; C:cytoplasm; F:protein-arginine omega-N asymmetric methyltransferase activity; P:peptidyl-arginine methylation, to asymmetrical-dimethyl arginine; F:histone-arginine N-methyltransferase activity; F:protein-arginine omega-N monomethy
BB454ONE002760	2	C:lipid particle; C:RNA-induced silencing complex
BB454ONE002761	5	P:ATP synthesis coupled proton transport; C:proton-transporting V-type ATPase, V1 domain; F:proton-transporting ATPase activity, rotational mechanism; F:hydrogen:potassium-exchanging ATPase activity; F:hydrogen ion transporting ATP synthase activity, rota
BB454ONE002762	5	P:anaphase-promoting complex-dependent proteasomal ubiquitin-dependent protein catabolic process; P:positive regulation of ubiquitin-protein ligase activity during mitotic cell cycle; P:negative regulation of ubiquitin-protein ligase activity during mitot
BB454ONE002763	0
BB454ONE002764	0
BB454ONE002766	12	C:cytosol; C:secretory granule; P:regulated secretory pathway; F:protein binding; F:nucleotide binding; C:mitochondrial matrix; F:glycine-tRNA ligase activity; P:glycyl-tRNA aminoacylation; P:glycine metabolic process; P:L-serine metabolic process; P:thre
BB454ONE002767	1	C:intracellular part
BB454ONE002768	4	P:metabolic process; F:monooxygenase activity; F:coenzyme binding; F:nucleotide binding
BB454ONE002769	5	C:cytoplasm; F:uridine phosphorylase activity; P:nucleotide catabolic process; P:nucleoside metabolic process; P:pyrimidine base metabolic process
BB454ONE002770	0
BB454ONE002771	3	F:ARF GTPase activator activity; P:regulation of ARF GTPase activity; F:zinc ion binding
BB454ONE002772	2	C:lipid particle; C:mitochondrion
BB454ONE002774	3	F:structural constituent of ribosome; F:hydrolase activity; C:ribosome
BB454ONE002775	8	P:glutamate biosynthetic process; P:proline catabolic process; C:mitochondrial matrix; P:oxidation reduction; P:locomotory behavior; F:proline dehydrogenase activity; P:arginine metabolic process; P:proline biosynthetic process
BB454ONE002776	10	P:vesicle-mediated transport; P:negative regulation of dendrite morphogenesis; P:chitin-based larval cuticle pattern formation; C:ER to Golgi transport vesicle; P:embryonic heart tube development; F:GTPase activity; P:intracellular protein transport; C:li
BB454ONE002777	7	F:metal ion binding; P:oxidation reduction; F:electron carrier activity; F:oxidoreductase activity; F:heme binding; F:iron ion binding; F:monooxygenase activity
BB454ONE002778	10	P:cytoplasmic transport, nurse cell to oocyte; P:endoplasmic reticulum organization; C:integral to membrane; P:exocytosis; P:establishment of ER localization; P:microtubule-based movement; P:oocyte growth; P:vitellogenesis; P:bristle morphogenesis; C:endo
BB454ONE002779	3	F:translation release factor activity; F:transferase activity; P:translational termination
BB454ONE002780	0
BB454ONE002781	5	C:cytoplasm; C:plasma membrane; F:protein binding; F:cysteine-type endopeptidase activity; P:proteolysis
BB454ONE002782	6	F:hydrogen-exporting ATPase activity, phosphorylative mechanism; F:hydrogen ion transporting ATP synthase activity, rotational mechanism; C:vacuolar proton-transporting V-type ATPase, V1 domain; P:ATP synthesis coupled proton transport; F:proton-transport
BB454ONE002783	1	F:structural constituent of cuticle
BB454ONE002784	4	P:dephosphorylation; F:catalytic activity; C:membrane; F:phosphatidate phosphatase activity
BB454ONE002785	1	C:cell part
BB454ONE002786	10	F:transition metal ion binding; P:protein modification process; F:protein binding; P:male meiosis; P:peptide metabolic process; C:secretory granule; C:extracellular region; F:peptidylglycine monooxygenase activity; F:lyase activity; C:membrane
BB454ONE002787	1	P:preassembly of GPI anchor in ER membrane
BB454ONE002788	7	P:hydrogen peroxide catabolic process; F:heme binding; P:oxidation reduction; F:catalase activity; P:tryptophan metabolic process; F:peroxidase reaction; P:methane metabolic process
BB454ONE002789	3	P:phototransduction; F:CDP-diacylglycerol-inositol 3-phosphatidyltransferase activity; P:glycerolipid metabolic process
BB454ONE002790	5	C:cell part; P:cellular catabolic process; F:epoxide hydrolase activity; P:xenobiotic metabolic process; P:response to toxin
BB454ONE002791	3	P:male courtship behavior; P:circadian rhythm; P:behavioral response to starvation
BB454ONE002792	14	P:cytokinesis, contractile ring formation; P:mushroom body development; P:axonogenesis; P:leg segmentation; P:female gonad development; F:SUMO binding; P:establishment of ommatidial polarity; P:actin filament polymerization; P:establishment of imaginal di
BB454ONE002794	2	F:oxidoreductase activity; F:iron ion binding
BB454ONE002795	1	P:response to heat
BB454ONE002796	4	C:nucleosome; F:DNA binding; P:nucleosome assembly; C:nucleus
BB454ONE002797	0
BB454ONE002798	2	F:GTP binding; C:intracellular
BB454ONE002799	3	P:response to bacterium; F:aspartic-type endopeptidase activity; P:proteolysis
BB454ONE002800	15	P:regulation of endocytosis; C:AP-2 adaptor complex; P:embryonic development ending in birth or egg hatching; P:clathrin coat assembly; P:neurotransmitter secretion; F:protein transporter activity; P:synaptic vesicle coating; P:intracellular protein trans
BB454ONE002801	8	F:structural constituent of cytoskeleton; P:microtubule-based movement; F:GTP binding; C:tubulin complex; P:muscle attachment; P:protein polymerization; F:GTPase activity; C:microtubule
BB454ONE002802	2	F:binding; C:cell part
BB454ONE002803	5	F:peptidase inhibitor activity; C:integral to membrane; P:regulation of transcription; C:membrane; C:extracellular region
BB454ONE002804	7	F:G-protein coupled receptor activity; P:phototransduction; P:protein-chromophore linkage; P:G-protein coupled receptor protein signaling pathway; F:photoreceptor activity; P:visual perception; C:integral to membrane
BB454ONE002805	8	P:mitotic spindle elongation; F:translation elongation factor activity; F:GTP binding; C:lipid particle; C:cytosol; F:GTPase activity; C:ribosome; P:regulation of translational elongation
BB454ONE002806	4	C:cytoplasm; F:binding; P:transport; C:membrane
BB454ONE002808	7	F:mRNA 3'-UTR binding; P:RNA modification; C:nucleolus; P:female gamete generation; F:protein binding; F:nuclease activity; C:cytoplasm
BB454ONE002809	9	P:microtubule-based movement; F:GTP binding; F:protein domain specific binding; P:protein polymerization; C:cytosol; F:protein heterodimerization activity; C:cytoplasmic microtubule; F:structural molecule activity; F:GTPase activity
BB454ONE002810	5	F:sequence-specific DNA binding; F:protein dimerization activity; F:transcription factor activity; P:regulation of transcription, DNA-dependent; C:transcription factor complex
BB454ONE002811	5	F:oxygen transporter activity; C:extracellular space; F:nutrient reservoir activity; C:extracellular region; P:transport
BB454ONE002812	9	P:terminal branching, open tracheal system; P:compound eye photoreceptor development; P:branch fusion, open tracheal system; P:negative regulation of terminal cell fate specification, open tracheal system; F:histidine decarboxylase activity; C:cytoplasm;
BB454ONE002813	5	C:cytosol; P:negative regulation of transcription from RNA polymerase II promoter; F:unfolded protein binding; P:response to unfolded protein; C:nucleus
BB454ONE002814	7	P:apoptosis; F:protein serine/threonine kinase activity; F:calcium ion binding; F:ATP binding; P:positive regulation of JNK cascade; P:protein amino acid phosphorylation; P:serine family amino acid metabolic process
BB454ONE002815	1	P:response to bacterium
BB454ONE002816	2	P:metabolic process; F:hydrolase activity
BB454ONE002817	0
BB454ONE002818	7	F:hydrolase activity, hydrolyzing O-glycosyl compounds; F:chitin binding; P:chitin metabolic process; P:carbohydrate metabolic process; F:catalytic activity; F:cation binding; C:extracellular region
BB454ONE002819	22	F:histone deacetylase binding; F:zinc ion binding; F:NAD binding; P:chromatin silencing at rDNA; F:tubulin deacetylase activity; P:histone deacetylation; C:chromatin silencing complex; F:ubiquitin binding; C:cytoplasm; P:protein amino acid ADP-ribosylatio
BB454ONE002820	6	C:Golgi apparatus; F:protein binding; P:microtubule-based process; C:cytoplasmic dynein complex; F:microtubule motor activity; C:microtubule
BB454ONE002821	3	P:male courtship behavior; P:circadian rhythm; P:behavioral response to starvation
BB454ONE002822	1	C:extracellular region
BB454ONE002823	6	F:fumarylacetoacetase activity; F:metal ion binding; P:tyrosine catabolic process; P:arginine catabolic process; C:cytosol; P:styrene catabolic process
BB454ONE002824	5	F:GTP binding; C:intracellular; C:membrane; P:small GTPase mediated signal transduction; F:GTPase activity
BB454ONE002825	3	P:male courtship behavior; P:circadian rhythm; P:behavioral response to starvation
BB454ONE002826	1	F:hydrolase activity
BB454ONE002827	1	F:protein binding
BB454ONE002828	7	F:structural constituent of ribosome; C:lipid particle; F:RNA binding; F:protein binding; C:cytosolic large ribosomal subunit; P:translational elongation; P:ribosome biogenesis
BB454ONE002830	1	F:carbohydrate binding
BB454ONE002831	8	C:microsome; C:ER-Golgi intermediate compartment; C:Golgi apparatus; F:protein binding; P:vesicle targeting; P:intracellular protein transport; C:integral to membrane; C:zymogen granule membrane
BB454ONE002832	6	F:nucleic acid binding; F:protein binding; C:nucleus; F:zinc ion binding; P:nuclear mRNA splicing, via spliceosome; F:nucleotide binding
BB454ONE002833	1	C:integral to membrane
BB454ONE002834	1	P:transmembrane transport
BB454ONE002835	2	P:ATP synthesis coupled proton transport; C:proton-transporting two-sector ATPase complex, catalytic domain
BB454ONE002836	1	C:integral to membrane
BB454ONE002838	3	P:cellular iron ion homeostasis; P:response to hydrogen peroxide; C:mitochondrion
BB454ONE002839	2	P:transport; C:integral to membrane
BB454ONE002840	2	P:glycolysis; F:2,3-bisphosphoglycerate-dependent phosphoglycerate mutase activity
BB454ONE002841	8	C:cytoplasm; C:heterotrimeric G-protein complex; F:signal transducer activity; P:phototransduction; P:G-protein coupled receptor protein signaling pathway; P:visual perception; C:rhabdomere; F:GTPase activity
BB454ONE002842	2	F:molecular_function; P:modification-dependent protein catabolic process
BB454ONE002843	3	P:protein folding; F:heat shock protein binding; F:FK506 binding
BB454ONE002844	10	C:sodium:potassium-exchanging ATPase complex; F:sodium:potassium-exchanging ATPase activity; C:septate junction; P:septate junction assembly; F:cation transmembrane transporter activity; ; P:regulation of tube diameter, open tracheal system; P:regulation
BB454ONE002845	6	F:mannose-1-phosphate guanylyltransferase activity; C:mitochondrion; P:biosynthetic process; F:GTP binding; P:fructose metabolic process; P:mannose metabolic process
BB454ONE002846	13	C:cytosol; P:lipid metabolic process; P:regulation of protein binding; C:basal plasma membrane; P:positive regulation of receptor-mediated endocytosis; F:protein C-terminus binding; F:phosphotyrosine binding; F:clathrin binding; C:early endosome; C:AP-2 a
BB454ONE002847	3	F:ATPase activity, coupled to transmembrane movement of substances; F:nucleotide binding; P:transport
BB454ONE002849	4	F:molecular_function; C:integral to membrane; C:membrane; P:biological_process
BB454ONE002850	4	P:regulation of transcription from RNA polymerase II promoter; P:cell cycle; P:pyrimidine nucleotide biosynthetic process; P:'de novo' pyrimidine base biosynthetic process
BB454ONE002851	4	C:extracellular region; P:terminal region determination; F:torso binding; P:signal transduction
BB454ONE002853	1	F:structural constituent of cuticle
BB454ONE002854	10	P:induction of apoptosis; P:oxygen and reactive oxygen species metabolic process; F:NADH dehydrogenase (ubiquinone) activity; C:mitochondrial respiratory chain complex I; P:negative regulation of cell growth; F:protein binding; P:mitochondrial electron tr
BB454ONE002856	5	P:proteasome assembly; P:regulation of apoptosis; P:mitotic cell cycle spindle assembly checkpoint; F:protein binding; C:nucleus
BB454ONE002857	2	F:methyltransferase activity; P:metabolic process
BB454ONE002859	34	P:DNA fragmentation involved in apoptosis; C:membrane raft; P:cellular protein catabolic process; F:palmitoyl-(protein) hydrolase activity; P:cofactor transport; P:neurotransmitter secretion; P:grooming behavior; P:lipid catabolic process; C:membrane frac
BB454ONE002860	5	F:hydrogen-exporting ATPase activity, phosphorylative mechanism; C:mitochondrial proton-transporting ATP synthase complex, coupling factor F(o); C:lipid particle; P:proton transport; P:oxidative phosphorylation
BB454ONE002861	1	F:structural constituent of cuticle
BB454ONE002862	7	P:carbohydrate transport; C:integral to membrane; F:substrate-specific transmembrane transporter activity; C:membrane; P:transmembrane transport; F:transporter activity; P:transport
BB454ONE002863	10	C:sodium:potassium-exchanging ATPase complex; F:sodium:potassium-exchanging ATPase activity; C:septate junction; P:septate junction assembly; F:cation transmembrane transporter activity; ; P:regulation of tube diameter, open tracheal system; P:regulation
BB454ONE002864	3	F:ATP binding; F:ATPase activity, coupled to transmembrane movement of substances; P:transport
BB454ONE002865	1	C:integral to membrane
BB454ONE000138	1	C:cell part
BB454ONE000139	5	P:translational elongation; F:translation elongation factor activity; P:translation; C:eukaryotic translation elongation factor 1 complex; F:guanyl-nucleotide exchange factor activity
BB454ONE000140	5	P:translational elongation; F:translation elongation factor activity; P:translation; C:eukaryotic translation elongation factor 1 complex; F:guanyl-nucleotide exchange factor activity
BB454ONE000141	5	P:translational elongation; F:translation elongation factor activity; P:translation; C:eukaryotic translation elongation factor 1 complex; F:guanyl-nucleotide exchange factor activity
BB454ONE000142	5	P:translational elongation; F:translation elongation factor activity; P:translation; C:eukaryotic translation elongation factor 1 complex; F:guanyl-nucleotide exchange factor activity
BB454ONE000143	5	P:translational elongation; F:translation elongation factor activity; P:translation; C:eukaryotic translation elongation factor 1 complex; F:guanyl-nucleotide exchange factor activity
BB454ONE000144	5	P:translational elongation; F:translation elongation factor activity; P:translation; C:eukaryotic translation elongation factor 1 complex; F:guanyl-nucleotide exchange factor activity
BB454ONE000145	11	F:translation initiation factor activity; P:negative regulation of translation; C:axon; C:cell soma; F:ribosome binding; P:long-term memory; P:axon midline choice point recognition; P:oogenesis; F:translation initiation factor binding; C:ribosome; P:regul
BB454ONE000146	11	F:translation initiation factor activity; P:negative regulation of translation; C:axon; C:cell soma; F:ribosome binding; P:long-term memory; P:axon midline choice point recognition; P:oogenesis; F:translation initiation factor binding; C:ribosome; P:regul
BB454ONE000147	11	F:translation initiation factor activity; P:negative regulation of translation; C:axon; C:cell soma; F:ribosome binding; P:long-term memory; P:axon midline choice point recognition; P:oogenesis; F:translation initiation factor binding; C:ribosome; P:regul
BB454ONE000148	11	F:translation initiation factor activity; P:negative regulation of translation; C:axon; C:cell soma; F:ribosome binding; P:long-term memory; P:axon midline choice point recognition; P:oogenesis; F:translation initiation factor binding; C:ribosome; P:regul
BB454ONE000149	9	P:regulation of transcription from RNA polymerase II promoter; P:protein folding; F:sequence-specific DNA binding; C:CCAAT-binding factor complex; F:transcription factor activity; P:retina development in camera-type eye; F:transcription coactivator activi
BB454ONE000150	9	P:regulation of transcription from RNA polymerase II promoter; P:protein folding; F:sequence-specific DNA binding; C:CCAAT-binding factor complex; F:transcription factor activity; P:retina development in camera-type eye; F:transcription coactivator activi
BB454ONE000151	7	P:RNA splicing; F:nucleic acid binding; C:spliceosome; F:protein binding; C:nuclear speck; P:mRNA processing; F:zinc ion binding
BB454ONE000152	4	C:integral to membrane; C:membrane; F:transporter activity; P:transport
BB454ONE000153	4	C:integral to membrane; C:membrane; F:transporter activity; P:transport
BB454ONE000154	4	C:integral to membrane; C:membrane; F:transporter activity; P:transport
BB454ONE000155	4	C:integral to membrane; C:membrane; F:transporter activity; P:transport
BB454ONE000156	4	C:integral to membrane; C:membrane; F:transporter activity; P:transport
BB454ONE000157	3	C:mitochondrial inner membrane; F:protein transporter activity; P:protein transport
BB454ONE000158	3	C:mitochondrial inner membrane; F:protein transporter activity; P:protein transport
BB454ONE000162	0
BB454ONE000163	0
BB454ONE000164	0
BB454ONE000165	2	F:nucleic acid binding; F:nucleotide binding
BB454ONE000168	1	F:structural constituent of cuticle
BB454ONE000169	1	F:structural constituent of cuticle
BB454ONE000170	3	C:cytosol; P:larval central nervous system remodeling; F:actin monomer binding
BB454ONE000171	3	C:cytosol; P:larval central nervous system remodeling; F:actin monomer binding
BB454ONE000172	4	P:cytoskeleton organization; C:cytosol; P:larval central nervous system remodeling; F:actin monomer binding
BB454ONE000173	4	P:cytoskeleton organization; C:cytosol; P:larval central nervous system remodeling; F:actin monomer binding
BB454ONE000174	3	F:hydrolase activity; C:endoplasmic reticulum; C:membrane part
BB454ONE000175	3	F:hydrolase activity; C:endoplasmic reticulum; C:membrane part
BB454ONE000176	3	F:hydrolase activity; C:endoplasmic reticulum; C:membrane part
BB454ONE000177	11	P:epithelial cell migration, open tracheal system; P:striated muscle contraction; F:structural constituent of muscle; F:microfilament motor activity; C:A band; F:ATPase activity, coupled; C:striated muscle thick filament; F:nucleotide binding; F:protein h
BB454ONE000178	11	P:epithelial cell migration, open tracheal system; P:striated muscle contraction; F:structural constituent of muscle; F:microfilament motor activity; C:A band; F:ATPase activity, coupled; C:striated muscle thick filament; F:nucleotide binding; F:protein h
BB454ONE000179	11	P:epithelial cell migration, open tracheal system; P:striated muscle contraction; F:structural constituent of muscle; F:microfilament motor activity; C:A band; F:ATPase activity, coupled; C:striated muscle thick filament; F:nucleotide binding; F:protein h
BB454ONE000180	11	P:epithelial cell migration, open tracheal system; P:striated muscle contraction; F:structural constituent of muscle; F:microfilament motor activity; C:A band; F:ATPase activity, coupled; C:striated muscle thick filament; F:nucleotide binding; F:protein h
BB454ONE000181	5	P:regulation of transcription from RNA polymerase II promoter; C:transcription factor complex; F:single-stranded DNA binding; F:transcription coactivator activity; P:positive regulation of transcription
BB454ONE000182	5	P:regulation of transcription from RNA polymerase II promoter; C:transcription factor complex; F:single-stranded DNA binding; F:transcription coactivator activity; P:positive regulation of transcription
BB454ONE000183	5	P:regulation of transcription from RNA polymerase II promoter; C:transcription factor complex; F:single-stranded DNA binding; F:transcription coactivator activity; P:positive regulation of transcription
BB454ONE000184	5	P:regulation of transcription from RNA polymerase II promoter; C:transcription factor complex; F:single-stranded DNA binding; F:transcription coactivator activity; P:positive regulation of transcription
BB454ONE000185	1	P:phagocytosis, engulfment
BB454ONE000186	1	P:phagocytosis, engulfment
BB454ONE002866	1	F:protein binding
BB454ONE002867	22	F:3-hydroxyacyl-CoA dehydrogenase activity; F:testosterone 17-beta-dehydrogenase activity; F:acetoacetyl-CoA reductase activity; P:acyl-CoA metabolic process; F:binding; F:estradiol 17-beta-dehydrogenase activity; C:lipid particle; F:3-alpha(17-beta)-hydr
BB454ONE002868	26	P:lung development; P:regulation of nuclear mRNA splicing, via spliceosome; P:kidney development; P:macrophage activation; P:histone H4-R3 demethylation; P:heart development; P:blood vessel development; P:erythrocyte development; F:histone demethylase act
BB454ONE002869	7	F:metal ion binding; P:oxidation reduction; F:electron carrier activity; F:oxidoreductase activity; F:heme binding; F:iron ion binding; F:monooxygenase activity
BB454ONE002870	10	C:microtubule associated complex; P:intracellular signaling cascade; F:nucleic acid binding; F:protein binding; P:nucleocytoplasmic transport; P:microtubule-based process; C:nucleus; C:endoplasmic reticulum; C:perinuclear region of cytoplasm; F:phosphatas
BB454ONE002871	0
BB454ONE002872	2	F:hydrolase activity; P:salivary gland cell autophagic cell death
BB454ONE002873	4	C:cytoskeleton; C:cytoplasm; F:ATP binding; F:protein binding
BB454ONE002874	6	F:receptor activity; F:phosphoprotein phosphatase activity; P:mRNA processing; C:nucleus; P:signal transduction; P:protein amino acid dephosphorylation
BB454ONE002875	5	C:spliceosome; P:mitotic spindle organization; F:RNA splicing factor activity, transesterification mechanism; C:small nuclear ribonucleoprotein complex; P:nuclear mRNA splicing, via spliceosome
BB454ONE002876	6	P:plasma membrane ATP synthesis coupled proton transport; F:hydrogen ion transporting ATP synthase activity, rotational mechanism; C:mitochondrial proton-transporting ATP synthase complex, catalytic core F(1); F:ATP binding; F:proton-transporting ATPase a
BB454ONE002877	2	F:structural constituent of chitin-based cuticle; F:structural constituent of cuticle
BB454ONE002878	3	C:integral to membrane; F:cation channel activity; P:monovalent inorganic cation transport
BB454ONE002879	1	F:peptidase activity
BB454ONE002880	5	P:cell motion; P:regulation of actin filament polymerization; C:Arp2/3 protein complex; F:actin binding; F:structural constituent of cytoskeleton
BB454ONE002882	5	F:pyridoxal phosphate binding; F:transferase activity, transferring nitrogenous groups; F:1-aminocyclopropane-1-carboxylate synthase activity; P:biosynthetic process; P:cellular amino acid and derivative metabolic process
BB454ONE002883	23	P:Golgi to endosome transport; C:cytosol; C:lamellar body; P:apical protein localization; C:lysosome; C:nuclear envelope-endoplasmic reticulum network; C:internal side of plasma membrane; P:small GTPase mediated signal transduction; F:glycoprotein binding
BB454ONE002885	20	P:response to hypoxia; P:female meiosis chromosome segregation; P:mesoderm development; P:distributive segregation; F:protein serine/threonine kinase activity; P:mitotic centrosome separation; P:meiotic metaphase I plate congression; P:mitotic cell cycle
BB454ONE002886	2	P:oxidation reduction; F:oxidoreductase activity
BB454ONE002887	6	C:cytoplasm; P:cellular response to DNA damage stimulus; C:proteasome core complex; C:nucleus; F:threonine-type endopeptidase activity; P:proteolysis involved in cellular protein catabolic process
BB454ONE002892	5	C:cytoplasm; P:protein folding; F:hydrolase activity; P:regulation of translational termination; C:nucleus
BB454ONE002893	1	F:transferase activity
BB454ONE002894	3	F:phosphoric diester hydrolase activity; C:membrane; P:primary metabolic process
BB454ONE002895	1	C:extracellular region
BB454ONE002896	1	F:hydrolase activity
BB454ONE002897	2	P:biological_process; C:cellular_component
BB454ONE002898	4	P:protein folding; P:response to stress; C:mitochondrial matrix; F:ATP binding
BB454ONE002899	6	P:regulation of transcription, DNA-dependent; F:metal ion binding; F:zinc ion binding; C:nucleus; F:DNA binding; C:intracellular
BB454ONE002900	1	F:peptidase activity, acting on L-amino acid peptides
BB454ONE002901	2	P:primary metabolic process; P:cellular biopolymer metabolic process
BB454ONE002902	1	F:binding
BB454ONE002903	3	F:kinase activity; P:fructose metabolic process; F:hydrolase activity
BB454ONE002905	4	C:intracellular organelle; F:transcription regulator activity; F:DNA binding; P:regulation of transcription
BB454ONE002906	2	F:single-stranded DNA binding; P:nucleotide-excision repair
BB454ONE002907	2	F:transferase activity; F:sulfotransferase activity
BB454ONE002908	4	P:protein folding; F:peptidyl-prolyl cis-trans isomerase activity; F:DNA binding; F:calcium ion binding
BB454ONE002909	4	C:cytoplasm; P:metabolic process; F:catalytic activity; C:nucleus
BB454ONE002910	8	C:mitochondrial envelope; F:heme binding; F:succinate dehydrogenase (ubiquinone) activity; P:tricarboxylic acid cycle; C:integral to membrane; F:succinate dehydrogenase activity; F:iron ion binding; C:mitochondrial inner membrane
BB454ONE002911	7	P:apoptosis; F:protein serine/threonine kinase activity; F:calcium ion binding; F:ATP binding; P:positive regulation of JNK cascade; P:protein amino acid phosphorylation; P:serine family amino acid metabolic process
BB454ONE002912	3	P:negative regulation of endopeptidase activity; F:serine-type endopeptidase inhibitor activity; P:negative regulation of peptide hormone processing
BB454ONE002913	2	C:integral to membrane; C:membrane
BB454ONE002914	6	F:oxidoreductase activity, acting on diphenols and related substances as donors; F:metal ion binding; F:iron-sulfur cluster binding; P:oxidation reduction; C:membrane part; C:mitochondrion
BB454ONE002915	6	F:peptidase inhibitor activity; P:negative regulation of coagulation; F:peptidase activity; F:serine-type endopeptidase inhibitor activity; C:extracellular region; C:cellular_component
BB454ONE002916	2	P:metabolic process; F:catalytic activity
BB454ONE002917	2	P:protein metabolic process; F:oxidoreductase activity, acting on sulfur group of donors, disulfide as acceptor
BB454ONE002918	12	C:cytosol; P:negative regulation of ubiquitin-protein ligase activity during mitotic cell cycle; F:zinc ion binding; P:cell division; P:anaphase-promoting complex-dependent proteasomal ubiquitin-dependent protein catabolic process; F:ubiquitin-protein lig
BB454ONE002919	4	P:proteolysis; F:hydrolase activity; F:aminopeptidase activity; C:intracellular
BB454ONE002920	2	F:transferase activity; F:glutathione transferase activity
BB454ONE002921	4	C:ribosome; F:structural constituent of ribosome; P:translation; P:ribosome biogenesis
BB454ONE002923	1	F:protein binding
BB454ONE002924	2	P:carbohydrate metabolic process; F:phosphotransferase activity, alcohol group as acceptor
BB454ONE002926	4	F:hydrogen-exporting ATPase activity, phosphorylative mechanism; C:vacuolar proton-transporting V-type ATPase, V1 domain; P:proton transport; P:oxidative phosphorylation
BB454ONE002927	8	F:kinase activity; P:ribonucleoside monophosphate biosynthetic process; F:ribose phosphate diphosphokinase activity; F:ATP binding; F:magnesium ion binding; P:nucleoside metabolic process; P:pentose-phosphate shunt; P:purine base metabolic process
BB454ONE002928	2	P:cell redox homeostasis; F:oxidoreductase activity
BB454ONE002929	4	C:ribosome; F:structural constituent of ribosome; P:translation; P:ribosome biogenesis
BB454ONE002930	1	F:unfolded protein binding
BB454ONE002933	10	F:manganese ion binding; F:NAD or NADH binding; F:isocitrate dehydrogenase (NADP+) activity; P:oxidation reduction; F:magnesium ion binding; P:isocitrate metabolic process; C:mitochondrion; P:glyoxylate cycle; P:glutathione metabolic process; P:reductive
BB454ONE002934	1	F:transferase activity
BB454ONE002936	3	F:transporter activity; C:intracellular; P:transport
BB454ONE002937	8	F:zinc ion binding; P:membrane organization; F:protein binding; C:COPII vesicle coat; P:ER to Golgi vesicle-mediated transport; C:perinuclear region of cytoplasm; P:intracellular protein transport; C:endoplasmic reticulum membrane
BB454ONE002938	14	P:cell cycle; P:actin filament organization; P:regulation of cell shape; P:nucleocytoplasmic transport; F:sphingomyelin phosphodiesterase activity; C:nuclear microtubule; P:cell adhesion; F:protein binding; F:GTPase activity; P:signal transduction; P:intr
BB454ONE002939	16	P:oocyte microtubule cytoskeleton polarization; F:serine-type endopeptidase activity; F:ATP-dependent peptidase activity; P:rhabdomere development; P:regulation of pole plasm oskar mRNA localization; P:endoplasmic reticulum organization; P:Golgi organizat
BB454ONE002940	3	F:metal ion binding; P:metabolic process; F:oxidoreductase activity
BB454ONE002941	6	C:cytoplasm; F:peptidase activity; C:intracellular membrane-bounded organelle; F:protein serine/threonine kinase activity; P:serine family amino acid metabolic process; P:phosphorylation
BB454ONE002942	2	F:molecular_function; P:biological_process
BB454ONE002943	17	P:response to radiation; P:female meiosis chromosome segregation; P:cell cycle arrest; F:protein serine/threonine kinase activity; P:spindle assembly; P:regulation of syncytial blastoderm mitotic cell cycle; P:cellularization; P:embryonic development via
BB454ONE002946	8	F:receptor activity; P:carbohydrate transport; C:integral to membrane; F:substrate-specific transmembrane transporter activity; C:membrane; P:transmembrane transport; F:transporter activity; P:transport
BB454ONE002949	3	F:nucleic acid binding; F:metal ion binding; F:hydrolase activity
BB454ONE002951	4	P:visual perception; P:response to stimulus; C:cytoplasm; P:signal transduction
BB454ONE002952	1	F:hydrolase activity
BB454ONE002953	3	F:molecular_function; P:biological_process; C:cellular_component
BB454ONE002954	0
BB454ONE002955	3	C:mitochondrial envelope; P:positive regulation of apoptosis; C:integral to membrane
BB454ONE002956	0
BB454ONE002957	7	C:tricarboxylic acid cycle enzyme complex; C:mitochondrial matrix; P:homeostasis of number of cells within a tissue; P:fumarate metabolic process; P:malate metabolic process; F:fumarate hydratase activity; P:reductive tricarboxylic acid cycle
BB454ONE002958	1	C:cytoplasm
BB454ONE002960	4	C:chaperonin-containing T-complex; P:chaperone mediated protein folding independent of cofactor; F:ATP binding; F:unfolded protein binding
BB454ONE002961	2	F:transporter activity; P:transport
BB454ONE002962	9	C:cytosol; P:smoothened signaling pathway; F:translation release factor activity, codon specific; P:salivary gland cell autophagic cell death; P:protein targeting; C:translation release factor complex; C:ribosome; ; P:regulation of translational terminati
BB454ONE002963	2	F:protein binding; C:mitochondrion
BB454ONE002964	9	C:integral to membrane; C:membrane; F:protein kinase activity; P:protein amino acid phosphorylation; F:nucleotide binding; F:ATP binding; F:kinase activity; F:protein tyrosine kinase activity; F:serine-type endopeptidase inhibitor activity
BB454ONE002965	9	P:response to oxidative stress; F:NAD or NADH binding; F:isocitrate dehydrogenase (NADP+) activity; P:glutathione metabolic process; P:oxidation reduction; F:magnesium ion binding; C:cytosol; P:isocitrate metabolic process; P:reductive tricarboxylic acid
BB454ONE002966	2	F:hydrolase activity, hydrolyzing O-glycosyl compounds; P:carbohydrate metabolic process
BB454ONE002967	1	C:intracellular part
BB454ONE002968	11	F:heme binding; F:iron ion binding; C:membrane; F:electron carrier activity; C:extrinsic to membrane; P:oxidation reduction; C:microsome; F:oxidoreductase activity; C:endoplasmic reticulum; F:metal ion binding; F:monooxygenase activity
BB454ONE002969	6	P:mitotic spindle elongation; F:structural constituent of ribosome; C:lipid particle; C:cytosolic large ribosomal subunit; P:translation; P:ribosome biogenesis
BB454ONE002971	3	P:cellular process; P:cellular component organization; C:nucleus
BB454ONE002972	1	F:structural constituent of cuticle
BB454ONE002973	2	P:cellular process; C:intracellular part
BB454ONE002974	2	F:selenium binding; P:cell redox homeostasis
BB454ONE002975	0
BB454ONE002976	8	F:structural constituent of cytoskeleton; P:microtubule-based movement; F:GTP binding; C:tubulin complex; P:muscle attachment; P:protein polymerization; F:GTPase activity; C:microtubule
BB454ONE002978	0
BB454ONE002979	2	F:protein binding; C:nucleus
BB454ONE002980	11	F:DNA-directed RNA polymerase activity; F:zinc ion binding; F:protein kinase activity; P:transcription initiation from RNA polymerase II promoter; C:nucleolus; C:DNA-directed RNA polymerase II, core complex; F:protein binding; P:RNA elongation from RNA po
BB454ONE002981	2	P:phosphoinositide dephosphorylation; F:phosphatidylinositol-4,5-bisphosphate 5-phosphatase activity
BB454ONE002982	3	C:proteasome complex; P:biological_process; F:protein binding
BB454ONE002983	3	P:body fluid secretion; F:diuretic hormone activity; P:signal transduction
BB454ONE002984	3	P:biological_process; F:FMN binding; C:cellular_component
BB454ONE002985	5	C:protein complex; F:protein methyltransferase activity; P:positive regulation of cell growth; F:protein binding; P:protein amino acid methylation
BB454ONE002986	5	P:protein folding; F:unfolded protein binding; C:cytoplasm; F:ATP binding; P:response to stress
BB454ONE002987	3	P:response to ecdysone; P:intracellular signaling cascade; P:pupariation
BB454ONE002989	0
BB454ONE002990	5	P:chromatin modification; F:identical protein binding; P:negative regulation of transcription; F:histone deacetylase binding; C:Sin3 complex
BB454ONE002991	4	F:ATPase activity, coupled to transmembrane movement of substances; P:transmembrane transport; F:ATP binding; C:integral to membrane
BB454ONE002992	31	P:neuron migration; P:Ras protein signal transduction; P:wing disc dorsal/ventral pattern formation; P:response to external stimulus; P:oocyte microtubule cytoskeleton polarization; F:histone deacetylase binding; F:phosphoserine binding; P:hippocampus dev
BB454ONE002994	2	F:peptidase activity; C:intracellular part
BB454ONE002995	4	F:transcription factor binding; F:N-(5-amino-5-carboxypentanoyl)-L-cysteinyl-D-valine synthase activity; C:transcription factor complex; P:penicillin biosynthetic process
BB454ONE002997	16	P:cytokinesis; F:calcium ion binding; C:midbody; C:unconventional myosin complex; P:cellularization; P:nuclear axial expansion; F:ATPase activity, coupled; P:regulation of actin cytoskeleton organization; P:imaginal disc-derived wing hair organization; F:
BB454ONE002998	0
BB454ONE002999	2	F:binding; P:biological_process
BB454ONE003001	0
BB454ONE003002	3	P:lipid metabolic process; C:lysosome; P:sphingolipid metabolic process
BB454ONE003004	14	F:cysteine dioxygenase activity; C:cytosol; F:ferrous iron binding; P:sulfur amino acid biosynthetic process; P:lactation; P:inflammatory response; P:response to ethanol; P:oxidation reduction; P:response to glucagon stimulus; P:L-cysteine catabolic proce
BB454ONE003005	4	C:membrane; P:instar larval or pupal development; C:mitochondrial envelope; C:lipid particle
BB454ONE003006	3	P:proteolysis; F:transferase activity; F:peptidase activity
BB454ONE003008	5	P:oxidation reduction; F:binding; F:oxidoreductase activity; P:metabolic process; F:catalytic activity
BB454ONE003009	18	P:regulation of growth; P:histone H4 acetylation; C:nuclear matrix; F:damaged DNA binding; P:DNA recombination; P:DNA repair; F:ATP-dependent DNA helicase activity; P:histone H2A acetylation; P:protein folding; F:identical protein binding; C:NuA4 histone
BB454ONE003010	2	P:multicellular organismal development; P:anatomical structure development
BB454ONE003011	3	P:cellular process; P:localization; C:cell part
BB454ONE003013	14	C:cytosol; P:regulation of actin filament bundle formation; P:embryonic development ending in birth or egg hatching; F:monosaccharide binding; C:soluble fraction; P:pentose-phosphate shunt, non-oxidative branch; P:glyceraldehyde-3-phosphate metabolic proc
BB454ONE003014	7	F:acyltransferase activity; F:transferase activity; F:histone acetyltransferase activity; P:signal transduction; F:GTP-Rho binding; F:protein binding; C:intracellular
BB454ONE003016	1	F:protein binding
BB454ONE003017	8	P:mitotic spindle elongation; C:cytoplasm; P:centrosome organization; C:proteasome core complex; P:cell proliferation; C:nucleus; F:threonine-type endopeptidase activity; P:proteolysis involved in cellular protein catabolic process
BB454ONE003018	1	C:cell part
BB454ONE003019	2	P:transport; C:integral to membrane
BB454ONE003020	1	C:mitochondrion
BB454ONE003021	4	F:metal ion binding; P:cellular iron ion homeostasis; C:Golgi apparatus; C:intracellular ferritin complex
BB454ONE003022	2	F:transferase activity; F:glutathione transferase activity
BB454ONE003024	2	P:biological_process; C:cellular_component
BB454ONE003025	2	F:zinc ion binding; F:protein binding
BB454ONE003026	0
BB454ONE003027	2	C:nucleolus; F:RNA binding
BB454ONE003028	1	C:mitochondrion
BB454ONE003030	2	C:integral to membrane; P:transport
BB454ONE003031	10	F:Rho guanyl-nucleotide exchange factor activity; P:axon guidance; P:central nervous system development; P:regulation of axonogenesis; P:actin cytoskeleton organization; P:peripheral nervous system development; F:catalytic activity; P:Rho protein signal t
BB454ONE003032	6	P:anaphase-promoting complex-dependent proteasomal ubiquitin-dependent protein catabolic process; P:negative regulation of ubiquitin-protein ligase activity during mitotic cell cycle; P:positive regulation of ubiquitin-protein ligase activity during mitot
BB454ONE003033	6	C:snRNP U2; F:nucleic acid binding; C:spliceosome; P:mitotic spindle organization; F:zinc ion binding; P:nuclear mRNA splicing, via spliceosome
BB454ONE003034	3	C:protein complex; P:cellular process; C:intracellular part
BB454ONE003037	8	P:defense response; C:intracellular membrane-bounded organelle; P:leukocyte degranulation; P:regulation of exocytosis; P:positive regulation of cellular process; C:cytoplasmic part; P:leukocyte mediated immunity; P:leukocyte activation
BB454ONE003038	13	P:apical protein localization; P:actin filament organization; P:regulation of cell shape; F:signal transducer activity; P:G-protein coupled receptor protein signaling pathway; P:asymmetric neuroblast division; C:heterotrimeric G-protein complex; P:embryon
BB454ONE003039	6	C:cytoplasm; F:NAD or NADH binding; P:oxidation reduction; P:glycolysis; F:glyceraldehyde-3-phosphate dehydrogenase (phosphorylating) activity; P:gluconeogenesis
BB454ONE003040	1	P:lipid biosynthetic process
BB454ONE003041	1	F:structural constituent of cuticle
BB454ONE003042	0
BB454ONE003043	9	C:nucleolus; P:negative regulation of transcription from RNA polymerase II promoter; F:sequence-specific DNA binding; F:transcription factor activity; F:transcription coactivator activity; P:in utero embryonic development; F:RNA polymerase II transcriptio
BB454ONE003044	6	P:cellular process; P:proteolysis; P:regulation of endopeptidase activity; F:protein binding; C:cell part; F:catalytic activity
BB454ONE003045	6	F:RNA binding; P:pseudouridine synthesis; C:ribonucleoprotein complex; P:RNA processing; F:protein binding; F:pseudouridine synthase activity
BB454ONE003046	0
BB454ONE003047	3	C:lipid particle; F:heme binding; C:membrane
BB454ONE003048	0
BB454ONE003049	1	P:intracellular signaling cascade
BB454ONE003050	11	F:translation initiation factor activity; C:eukaryotic translation initiation factor 4F complex; C:cytosol; F:mRNA binding; F:ATP-dependent helicase activity; F:RNA cap binding; F:ATP binding; F:protein binding; P:regulation of translational initiation; P
BB454ONE003051	4	P:biosynthetic process; P:cellular carbohydrate metabolic process; F:isomerase activity; P:glucose metabolic process
BB454ONE003052	6	F:phosphoribosylaminoimidazole carboxylase activity; P:'de novo' IMP biosynthetic process; F:phosphoribosylaminoimidazolesuccinocarboxamide synthase activity; F:ATP binding; P:purine base metabolic process; C:phosphoribosylaminoimidazole carboxylase compl
BB454ONE003053	6	P:oxidation reduction; F:binding; F:oxidoreductase activity; P:metabolic process; F:catalytic activity; F:zinc ion binding
BB454ONE003054	6	C:proteasome complex; P:negative regulation of ubiquitin-protein ligase activity during mitotic cell cycle; C:nucleolus; P:anaphase-promoting complex-dependent proteasomal ubiquitin-dependent protein catabolic process; P:positive regulation of ubiquitin-p
BB454ONE003056	10	P:head involution; P:Malpighian tubule morphogenesis; F:electron carrier activity; C:mitochondrial matrix; P:oxidative phosphorylation; F:FAD binding; P:morphogenesis of an epithelium; P:open tracheal system development; C:lipid particle; P:electron trans
BB454ONE003057	0
BB454ONE003059	0
BB454ONE003060	10	P:dorsal/ventral axis specification; P:melanotic encapsulation of foreign target; F:serine-type endopeptidase inhibitor activity; P:response to wounding; P:negative regulation of proteolysis; P:negative regulation of melanization defense response; P:defen
BB454ONE003061	7	C:cytoplasm; C:Arp2/3 protein complex; F:protein binding, bridging; P:actin nucleation; F:actin filament binding; C:cell projection; P:actin filament polymerization
BB454ONE003062	6	P:protein folding; C:lipid particle; P:mitotic spindle organization; F:ATP binding; F:unfolded protein binding; F:ATPase activity, coupled
BB454ONE003063	0
BB454ONE003064	0
BB454ONE003065	1	C:integral to membrane
BB454ONE003066	0
BB454ONE003067	2	F:molecular_function; P:biological_process
BB454ONE003068	0
BB454ONE003069	2	P:aromatic amino acid family metabolic process; F:transaminase activity
BB454ONE003070	7	P:regulation of nuclear mRNA splicing, via spliceosome; P:regulation of cell cycle; P:muscle organ development; F:protein binding; P:nucleosome assembly; C:RCAF complex; P:dendrite morphogenesis
BB454ONE003071	1	F:heat shock protein binding
BB454ONE003072	2	C:collagen type IV; P:epithelial cell differentiation
BB454ONE003073	3	F:chitin binding; P:chitin metabolic process; C:extracellular region
BB454ONE003074	3	F:hydrolase activity, acting on ester bonds; F:zinc ion binding; C:nucleus
BB454ONE003075	0
BB454ONE003076	1	P:neurotransmitter secretion
BB454ONE003077	7	F:NAD or NADH binding; C:lipid particle; P:oxidation reduction; F:magnesium ion binding; P:tricarboxylic acid cycle; F:isocitrate dehydrogenase (NAD+) activity; C:mitochondrion
BB454ONE003078	2	P:biological_process; C:cellular_component
BB454ONE003079	1	C:ribosome
BB454ONE003080	46	F:oxidized purine DNA binding; P:negative regulation of DNA recombination; P:determination of adult life span; P:response to X-ray; F:MutLalpha complex binding; F:protein C-terminus binding; F:four-way junction DNA binding; F:hypoxanthine phosphoribosyltr
BB454ONE003081	3	F:nucleic acid binding; F:ATP binding; F:ATP-dependent helicase activity
BB454ONE003082	5	C:integral to membrane; C:membrane; P:transmembrane transport; F:transporter activity; P:transport
BB454ONE003085	22	P:flight behavior; P:axon target recognition; P:jump response; P:regulation of histone ubiquitination; P:grooming behavior; P:double-strand break repair via homologous recombination; P:photoreceptor cell morphogenesis; F:ubiquitin binding; C:cytoplasm; C:
BB454ONE003086	3	P:protein folding; F:peptidyl-prolyl cis-trans isomerase activity; F:protein binding
BB454ONE003087	3	P:transport; F:lipid binding; F:transporter activity
BB454ONE003088	8	P:negative regulation of ubiquitin-protein ligase activity during mitotic cell cycle; F:identical protein binding; F:threonine-type endopeptidase activity; P:anaphase-promoting complex-dependent proteasomal ubiquitin-dependent protein catabolic process; P
BB454ONE003089	2	P:metabolic process; F:hydrolase activity
BB454ONE003090	3	P:proteolysis; F:aminopeptidase activity; C:intracellular
BB454ONE003091	1	F:binding
BB454ONE003092	5	P:carbohydrate biosynthetic process; F:transferase activity; C:integral to membrane; C:Golgi apparatus; F:sulfotransferase activity
BB454ONE003094	1	F:structural constituent of cuticle
BB454ONE003095	10	C:synapse; P:exocytosis; P:neurotransmitter secretion; F:protein binding; P:regulation of muscle contraction; P:rhabdomere membrane biogenesis; C:cytoplasm; P:synaptic vesicle endocytosis; P:protein localization; C:plasma membrane
BB454ONE003096	0
BB454ONE003097	11	F:transferase activity; P:biosynthetic process; F:acyl carrier activity; F:hydrolase activity, acting on ester bonds; F:zinc ion binding; P:oxidation reduction; F:oxidoreductase activity; F:catalytic activity; F:cofactor binding; P:metabolic process; F:bi
BB454ONE003098	0
BB454ONE003099	2	C:membrane; F:sugar binding
BB454ONE003100	1	P:cell-matrix adhesion
BB454ONE003101	7	P:transmembrane transport; F:zinc ion binding; F:P-P-bond-hydrolysis-driven protein transmembrane transporter activity; C:mitochondrial inner membrane presequence translocase complex; P:protein import into mitochondrial inner membrane; C:mitochondrial int
BB454ONE003103	11	P:microtubule cytoskeleton organization; P:olfactory learning; P:axonogenesis; P:dendrite morphogenesis; P:neurofilament cytoskeleton organization; P:negative regulation of neuron apoptosis; F:microtubule binding; C:microtubule associated complex; P:axon
BB454ONE003104	6	F:pyridoxal phosphate binding; F:amino acid binding; F:L-threonine ammonia-lyase activity; P:glycine metabolic process; P:L-serine metabolic process; P:threonine metabolic process
BB454ONE003106	8	P:cell motion; C:cortical cytoskeleton; P:lamellipodium assembly; F:actin binding; C:F-actin capping protein complex; C:lamellipodium; P:actin filament capping; C:membrane
BB454ONE003108	3	F:triacylglycerol lipase activity; P:lipid catabolic process; P:glycerolipid metabolic process
BB454ONE003109	1	C:translocon complex
BB454ONE003110	3	F:molecular_function; P:ribosome biogenesis; C:nucleus
BB454ONE003112	0
BB454ONE003113	2	C:cytoplasmic part; C:membrane
BB454ONE003114	2	C:endoplasmic reticulum; C:membrane part
BB454ONE003116	1	F:binding
BB454ONE003118	1	F:protein binding
BB454ONE003119	0
BB454ONE003120	1	F:catalytic activity
BB454ONE003121	0
BB454ONE003124	2	F:metal ion binding; C:intracellular
BB454ONE003126	10	P:protein amino acid dephosphorylation; F:protein phosphatase type 2A regulator activity; P:Wnt receptor signaling pathway; P:imaginal disc pattern formation; P:sensory organ development; P:regulation of mitosis; F:protein serine/threonine phosphatase act
BB454ONE003127	0
BB454ONE003128	1	F:structural constituent of cuticle
BB454ONE003130	0
BB454ONE003132	2	F:nucleic acid binding; F:nucleotide binding
BB454ONE003133	6	C:cytoskeleton; P:protein folding; C:plasma membrane; F:unfolded protein binding; C:nucleus; C:cytosol
BB454ONE003134	3	C:extracellular region; F:kinase activity; P:response to virus
BB454ONE003135	0
BB454ONE003136	2	F:catalytic activity; P:trehalose biosynthetic process
BB454ONE003139	0
BB454ONE003143	11	P:oxidation reduction; F:3-hydroxyacyl-CoA dehydrogenase activity; P:embryonic development ending in birth or egg hatching; F:coenzyme binding; P:isoleucine catabolic process; P:leucine catabolic process; P:lysine catabolic process; P:tryptophan metabolic
BB454ONE003144	7	P:S-adenosylmethionine biosynthetic process; F:methionine adenosyltransferase activity; F:potassium ion binding; P:one-carbon compound metabolic process; F:ATP binding; F:magnesium ion binding; P:methionine metabolic process
BB454ONE003145	6	P:anion transport; F:voltage-gated anion channel activity; F:protein binding; C:integral to membrane; C:mitochondrial outer membrane; C:mitochondrial nucleoid
BB454ONE003147	3	F:protein kinase activity; F:ATP binding; P:apoptosis
BB454ONE003152	4	F:nucleic acid binding; F:zinc ion binding; C:intracellular; C:nucleus
BB454ONE003153	9	P:transmembrane transport; P:fatty acid metabolic process; C:mitochondrion; F:ATPase activity, coupled to transmembrane movement of substances; C:peroxisomal membrane; C:ATP-binding cassette (ABC) transporter complex; F:ATP binding; F:protein binding; C:i
BB454ONE003154	1	F:peptidase activity
BB454ONE003155	2	P:Golgi vesicle transport; C:Golgi transport complex
BB454ONE003156	8	P:response to oxidative stress; P:regulation of mitochondrion organization; P:sperm mitochondrion organization; C:Nebenkern; F:kinase activity; P:compound eye development; P:mitochondrial fission; P:negative regulation of neuron apoptosis
BB454ONE003158	9	C:nucleoplasm; P:spliceosomal snRNP biogenesis; C:spliceosome; F:RNA splicing factor activity, transesterification mechanism; F:RNA binding; F:protein binding; C:small nuclear ribonucleoprotein complex; C:cytosol; P:spliceosome assembly
BB454ONE003159	13	P:induction of apoptosis by oxidative stress; F:zinc ion binding; P:modification-dependent protein catabolic process; P:protein neddylation; P:anti-apoptosis; P:apoptotic mitochondrial changes; F:NEDD8 ligase activity; F:ubiquitin-protein ligase activity;
BB454ONE003161	4	P:purine base metabolic process; F:AMP deaminase activity; P:purine ribonucleoside monophosphate biosynthetic process; F:protein binding
BB454ONE003166	4	F:lipoic acid binding; C:glycine cleavage complex; C:mitochondrion; P:glycine decarboxylation via glycine cleavage system
BB454ONE003167	3	C:integral to mitochondrial inner membrane; F:molecular_function; P:biological_process
BB454ONE003170	2	P:maternal specification of dorsal/ventral axis, oocyte, germ-line encoded; P:vesicle-mediated transport
BB454ONE003171	6	F:hydrolase activity, hydrolyzing O-glycosyl compounds; F:glucan 1,3-alpha-glucosidase activity; P:carbohydrate metabolic process; P:metabolic process; F:hydrolase activity; F:hydrolase activity, acting on glycosyl bonds
BB454ONE003173	3	P:metabolic process; F:oxidoreductase activity, acting on the CH-CH group of donors; C:lipid particle
BB454ONE003174	2	F:protein binding; C:cytoplasm
BB454ONE003175	11	P:cellular metabolic process; C:nucleus; F:nucleotide binding; F:catalytic activity; P:transcription from RNA polymerase III promoter; F:receptor activity; C:DNA polymerase III complex; P:transcription; C:plasma membrane; P:biological_process; F:DNA-direc
BB454ONE003176	3	F:binding; P:metabolic process; F:catalytic activity
BB454ONE003177	10	P:modification-dependent protein catabolic process; P:regulation of protein metabolic process; P:positive regulation of neuron apoptosis; P:protein neddylation; F:NEDD8 ligase activity; F:ubiquitin-protein ligase activity; F:ATP binding; F:ribosomal S6-gl
BB454ONE003178	3	F:iron ion binding; F:phosphoprotein phosphatase activity; P:protein amino acid dephosphorylation
BB454ONE003179	6	F:binding; F:sulfurtransferase activity; P:cellular protein metabolic process; P:tRNA processing; P:biopolymer modification; C:cytoplasm
BB454ONE003180	2	C:nucleus; F:DNA binding
BB454ONE003186	1	P:protein transport
BB454ONE003187	4	F:fatty-acid synthase activity; C:fatty acid synthase complex; P:fatty acid biosynthetic process; P:acyl-carrier-protein biosynthetic process
BB454ONE003188	2	C:spliceosome; P:nuclear mRNA splicing, via spliceosome
BB454ONE003191	1	F:binding
BB454ONE003192	3	F:binding; P:intracellular protein transport; F:protein transporter activity
BB454ONE003193	4	F:zinc ion binding; F:DNA binding; C:intracellular; C:nucleus
BB454ONE003194	7	C:cytoplasm; C:nucleolus; C:cytoskeleton; F:nucleic acid binding; F:protein binding; C:ribonucleoprotein complex; P:nuclear mRNA splicing, via spliceosome
BB454ONE003195	13	F:RNA binding; F:protein binding; P:transmembrane transport; C:eukaryotic translation initiation factor 2 complex; F:sodium ion binding; F:translation initiation factor activity; C:integral to membrane; C:cytosol; F:zinc ion binding; F:symporter activity;
BB454ONE003196	0
BB454ONE003198	10	P:aminophospholipid transport; C:integral to membrane; F:ATPase activity, coupled to transmembrane movement of ions, phosphorylative mechanism; P:ATP biosynthetic process; F:cation-transporting ATPase activity; F:ATP binding; P:phospholipid transport; F:m
BB454ONE003200	2	F:RNA binding; F:ribonuclease activity
BB454ONE003201	2	C:integral to membrane; C:membrane
BB454ONE003202	1	C:membrane
BB454ONE003203	8	C:nucleoplasm; P:cell proliferation; F:kinase activity; P:mitosis; F:cyclin-dependent protein kinase regulator activity; P:regulation of cyclin-dependent protein kinase activity; P:cell division;
BB454ONE003204	4	F:retinal binding; F:transporter activity; C:intracellular; P:transport
BB454ONE003205	1	C:snRNP U1
BB454ONE003206	5	F:binding; P:negative regulation of Rho GTPase activity; P:protein amino acid adenylylation; C:integral to membrane; F:protein adenylyltransferase activity
BB454ONE003208	0
BB454ONE003209	2	C:integral to membrane; C:membrane
BB454ONE003210	2	F:hydrolase activity; F:binding
BB454ONE003213	4	P:carbohydrate metabolic process; F:phosphotransferase activity, alcohol group as acceptor; F:kinase activity; F:nucleotide binding
BB454ONE003214	15	F:microtubule binding; F:damaged DNA binding; F:lyase activity; F:DNA-directed DNA polymerase activity; F:metal ion binding; C:spindle microtubule; P:pyrimidine dimer repair; F:enzyme binding; P:anti-apoptosis; P:base-excision repair, gap-filling; C:nucle
BB454ONE003218	0
BB454ONE003219	5	C:late endosome; C:lysosome; P:transcription; P:endosome transport; F:ubiquitin binding
BB454ONE003220	4	F:L-malate dehydrogenase activity; P:oxidation reduction; F:oxidoreductase activity; P:metabolic process
BB454ONE003221	2	C:ribosome; P:ribosome biogenesis
BB454ONE003223	9	F:protein N-terminus binding; P:Wnt receptor signaling pathway; F:protein serine/threonine kinase activity; F:ATP binding; C:NuRD complex; C:Sin3 complex; C:plasma membrane; P:protein amino acid phosphorylation; P:serine family amino acid metabolic proces
BB454ONE003224	2	P:cellular acyl-CoA homeostasis; F:acyl-CoA binding
BB454ONE003225	7	F:very-long-chain-fatty-acid-CoA ligase activity; P:fatty acid transport; F:protein binding; P:long-chain fatty acid metabolic process; F:fatty acid transporter activity; F:long-chain-fatty-acid-CoA ligase activity; C:membrane
BB454ONE003229	2	C:lipid particle; F:catalytic activity
BB454ONE003230	8	P:DNA replication; F:iron ion binding; P:oxidation reduction; P:deoxyribonucleoside diphosphate metabolic process; F:ribonucleoside-diphosphate reductase activity; C:ribonucleoside-diphosphate reductase complex; P:purine base metabolic process; P:pyrimidi
BB454ONE003232	1	C:integral to membrane
BB454ONE003233	2	F:identical protein binding; P:metabolic process
BB454ONE003234	2	F:phospholipid binding; P:wing disc dorsal/ventral pattern formation
BB454ONE003235	3	P:G-protein coupled receptor protein signaling pathway; F:GTPase activity; C:heterotrimeric G-protein complex
BB454ONE003236	5	C:eukaryotic translation initiation factor 3 complex; F:translation initiation factor activity; C:cytosol; C:ribosome; P:regulation of translational initiation
BB454ONE003237	5	P:mitochondrial electron transport, NADH to ubiquinone; C:mitochondrial respiratory chain complex I; F:coenzyme binding; F:NADH dehydrogenase activity; P:electron transport
BB454ONE003238	6	P:nucleosome mobilization; P:ecdysone receptor-mediated signaling pathway; C:cytoplasm; F:hydrolase activity; P:transcription; C:NURF complex
BB454ONE003240	1	F:ligase activity
BB454ONE003241	0
BB454ONE003244	1	P:metabolic process
BB454ONE003246	2	F:nucleic acid binding; C:ribonucleoprotein complex
BB454ONE003248	13	F:glutamate dehydrogenase activity; P:glutamate catabolic process to 2-oxoglutarate; F:glutamate dehydrogenase [NAD(P)+] activity; P:oxidation reduction; P:NADH oxidation; F:identical protein binding; P:aerobic respiration; C:mitochondrial matrix; P:sperm
BB454ONE003254	8	F:2 iron, 2 sulfur cluster binding; C:mitochondrial respiratory chain complex II; F:electron carrier activity; P:tricarboxylic acid cycle; P:mitochondrial electron transport, succinate to ubiquinone; F:succinate dehydrogenase (ubiquinone) activity; F:iron
BB454ONE003255	4	C:cytoplasm; F:lipoate synthase activity; F:4 iron, 4 sulfur cluster binding; P:lipoate biosynthetic process
BB454ONE003258	2	F:molecular_function; P:biological_process
BB454ONE003259	4	F:metal ion binding; F:zinc ion binding; F:protein binding; C:intracellular
BB454ONE003260	1	P:iron-sulfur cluster assembly
BB454ONE003262	3	C:membrane; C:lysosome; C:endosome
BB454ONE003265	0
BB454ONE003266	2	F:odorant binding; P:transport
BB454ONE003267	8	P:cholesterol homeostasis; P:glycolipid transport; C:lysosome; P:intracellular cholesterol transport; F:enzyme binding; P:phospholipid transport; F:cholesterol binding; P:regulation of isoprenoid metabolic process
BB454ONE003269	1	F:protein binding
BB454ONE003270	2	P:oxidation reduction; F:oxidoreductase activity
BB454ONE003271	0
BB454ONE003272	7	C:endosome; P:antigen receptor-mediated signaling pathway; C:extrinsic to membrane; F:CD4 receptor binding; P:cell death; C:trans-Golgi network transport vesicle; C:cytosol
BB454ONE003273	3	C:intracellular; P:proteolysis; F:aminopeptidase activity
BB454ONE003274	1	F:hydrolase activity
BB454ONE003276	5	F:NF-kappaB binding; P:tumor necrosis factor-mediated signaling pathway; P:negative regulation of transcription; P:negative regulation of NF-kappaB transcription factor activity; C:transcription factor complex
BB454ONE003277	3	F:oxidoreductase activity; P:metabolic process; F:binding
BB454ONE003278	4	F:peptidase activity; P:signal peptide processing; C:integral to membrane; C:signal peptidase complex
BB454ONE003281	11	F:ATP binding; P:glycolysis; F:hexokinase activity; P:starch metabolic process; P:sucrose metabolic process; P:fructose metabolic process; P:galactose metabolic process; P:mannose metabolic process; P:amino sugar metabolic process; P:gluconeogenesis; P:st
BB454ONE003283	3	C:membrane; F:metal ion binding; F:transferase activity
BB454ONE003286	1	C:mitochondrion
BB454ONE003289	2	C:intracellular; F:GTP binding
BB454ONE003291	0
BB454ONE003292	2	F:molecular_function; P:biological_process
BB454ONE003293	1	F:hydrolase activity
BB454ONE003296	3	P:cellular process; P:tissue development; P:muscle organ development
BB454ONE003297	8	P:regulation of DNA recombination; F:nuclear localization sequence binding; P:NLS-bearing substrate import into nucleus; P:M phase specific microtubule process; P:G2 phase of mitotic cell cycle; C:cytoplasm; F:histone deacetylase binding; C:histone deacet
BB454ONE003300	1	P:lipid metabolic process
BB454ONE003302	3	F:methyltransferase activity; F:homocysteine S-methyltransferase activity; F:transferase activity
BB454ONE003304	1	C:mitochondrion
BB454ONE003307	7	P:iron-sulfur cluster assembly; F:iron ion binding; F:protein binding; F:4 iron, 4 sulfur cluster binding; C:nucleus; C:cytosol; C:mitochondrion
BB454ONE003308	4	C:lysosomal membrane; F:molecular_function; C:membrane; P:biological_process
BB454ONE003310	3	C:cytoplasm; F:protein binding; C:signalosome
BB454ONE003311	0
BB454ONE003314	3	F:zinc ion binding; C:intracellular; F:protein binding
BB454ONE003315	0
BB454ONE003318	0
BB454ONE003319	1	F:ligase activity
BB454ONE003320	0
BB454ONE003321	3	F:translation initiation factor activity; C:ribosome; P:regulation of translational initiation
BB454ONE003323	1	F:structural molecule activity
BB454ONE003325	2	P:negative regulation of coagulation; F:serine-type endopeptidase inhibitor activity
BB454ONE003326	6	F:mRNA binding; P:regulation of alternative nuclear mRNA splicing, via spliceosome; P:mRNA splice site selection; F:protein binding; C:omega speckle; F:RNA splicing factor activity, transesterification mechanism
BB454ONE003327	3	F:odorant binding; C:extracellular space; P:transport
BB454ONE003328	17	F:translation initiation factor activity; C:eukaryotic translation initiation factor 2 complex; P:response to glucose stimulus; C:eukaryotic translation initiation factor 2B complex; C:soluble fraction; F:guanyl-nucleotide exchange factor activity; P:resp
BB454ONE003331	3	C:extracellular region; F:chitin binding; P:chitin metabolic process
BB454ONE003334	7	P:transmembrane transport; F:zinc ion binding; F:P-P-bond-hydrolysis-driven protein transmembrane transporter activity; C:mitochondrial inner membrane; P:protein import into mitochondrial inner membrane; C:mitochondrial intermembrane space protein transpo
BB454ONE003335	14	F:protein N-terminus binding; C:protein kinase CK2 complex; P:Wnt receptor signaling pathway; F:beta-catenin binding; F:protein serine/threonine kinase activity; F:protein phosphatase regulator activity; P:regulation of cell growth; F:ATP binding; C:NuRD
BB454ONE003337	1	P:cellular metabolic process
BB454ONE003340	1	F:transferase activity
BB454ONE003341	2	P:nitrogen compound metabolic process; F:hydrolase activity, acting on carbon-nitrogen (but not peptide) bonds
BB454ONE003343	3	P:regulation of protein catabolic process; C:proteasome complex; F:enzyme regulator activity
BB454ONE003344	0
BB454ONE003345	4	P:translational elongation; F:translation elongation factor activity; P:translation; C:intracellular
BB454ONE003347	2	C:mitochondrion; P:translation
BB454ONE003349	4	F:P-P-bond-hydrolysis-driven protein transmembrane transporter activity; C:mitochondrial outer membrane translocase complex; P:protein targeting to mitochondrion; C:chloroplast envelope
BB454ONE003350	10	C:cytosol; P:Mo-molybdopterin cofactor biosynthetic process; P:iron incorporation into metallo-sulfur cluster; P:protein complex assembly; F:cysteine desulfurase activity; C:mitochondrial matrix; F:protein homodimerization activity; F:pyridoxal phosphate
BB454ONE003351	0
BB454ONE003354	0
BB454ONE003357	15	P:maintenance of protein location in cell; P:histoblast morphogenesis; P:dorsal closure; P:cytokinesis, contractile ring formation; P:brain development; P:cell morphogenesis; P:karyosome formation; P:spermatogenesis; P:actin filament polymerization; F:pho
BB454ONE003358	2	C:peroxisome; C:mitochondrion
BB454ONE003360	9	F:transcription repressor activity; P:spermatogenesis; F:transferase activity; C:chromocenter; C:nuclear envelope; C:condensed chromosome, centromeric region; P:negative regulation of transcription, DNA-dependent; C:nuclear centromeric heterochromatin; C:
BB454ONE003361	2	P:proteolysis; F:aspartic-type endopeptidase activity
BB454ONE003363	2	C:cytoplasm; P:cell division
BB454ONE003364	0
BB454ONE003366	0
BB454ONE003369	5	P:protein folding; C:cytoplasm; F:peptidyl-prolyl cis-trans isomerase activity; P:cellular response to DNA damage stimulus; F:FK506 binding
BB454ONE003371	6	F:3',5'-cyclic-AMP phosphodiesterase activity; F:serine-type endopeptidase inhibitor activity; F:calcium- and calmodulin-regulated 3',5'-cyclic-GMP phosphodiesterase activity; P:signal transduction; P:regulation of proteolysis; P:cyclic nucleotide metabol
BB454ONE003372	6	C:cytoplasm; P:protein folding; P:mitotic spindle organization; F:ATP binding; F:unfolded protein binding; F:ATPase activity, coupled
BB454ONE003373	1	F:carbon-nitrogen ligase activity, with glutamine as amido-N-donor
BB454ONE003374	3	P:DNA repair; C:intracellular; F:DNA binding
BB454ONE003375	4	P:protein complex assembly; F:protein binding; P:actin filament-based process; C:cytoplasm
BB454ONE003377	6	C:cytoplasm; P:protein folding; P:mitotic spindle organization; F:ATP binding; F:unfolded protein binding; F:ATPase activity, coupled
BB454ONE003378	1	C:lipid particle
BB454ONE003379	3	C:extracellular region; F:hormone activity; P:signal transduction
BB454ONE003380	2	C:ribosome; C:mitochondrion
BB454ONE003381	1	P:rRNA processing
BB454ONE003382	0
BB454ONE003383	7	P:ER-associated protein catabolic process; C:integral to endoplasmic reticulum membrane; F:MHC class I protein binding; P:endoplasmic reticulum unfolded protein response; P:retrograde protein transport, ER to cytosol; P:interspecies interaction between or
BB454ONE003384	1	C:membrane
BB454ONE003386	9	P:neurotransmitter secretion; C:tight junction; C:synaptosome; C:postsynaptic membrane; C:extrinsic to membrane; P:exocytosis; C:subapical complex; F:PDZ domain binding; P:protein transport
BB454ONE003388	3	P:hemopoiesis; F:binding; P:cellular process
BB454ONE003389	1	F:zinc ion binding
BB454ONE003392	1	C:membrane
BB454ONE003395	11	F:nucleic acid binding; P:aspartyl-tRNA aminoacylation; F:protein binding; F:asparagine-tRNA ligase activity; F:ATP binding; P:asparaginyl-tRNA aminoacylation; C:cytosol; F:aspartate-tRNA ligase activity; C:mitochondrion; P:alanine metabolic process; P:as
BB454ONE003396	6	F:metal ion binding; P:synaptic vesicle maturation; P:establishment of protein localization; F:palmitoyltransferase activity; P:protein palmitoylation; P:acyl-carrier-protein biosynthetic process
BB454ONE003397	3	F:dopamine beta-monooxygenase activity; F:peptidase activity; P:histidine catabolic process
BB454ONE003398	7	F:metal ion binding; P:oxidation reduction; F:electron carrier activity; F:oxidoreductase activity; F:heme binding; F:iron ion binding; F:monooxygenase activity
BB454ONE003400	4	C:ribosome; F:structural constituent of ribosome; P:translation; P:ribosome biogenesis
BB454ONE003401	8	C:cytoplasm; P:mRNA catabolic process; P:RNA splicing; F:RNA binding; P:mRNA processing; C:ribonucleoprotein complex; C:nucleus; F:protein heterodimerization activity
BB454ONE003404	8	C:eukaryotic translation initiation factor 3 complex; F:RNA binding; P:regulation of translational initiation; F:protein complex scaffold; F:translation initiation factor activity; C:cytosol; F:nucleotide binding; C:ribosome
BB454ONE003405	2	C:cell part; P:cellular process
BB454ONE003406	0
BB454ONE003407	5	C:mitochondrial small ribosomal subunit; F:structural constituent of ribosome; F:protein binding; P:translation; P:ribosome biogenesis
BB454ONE003409	1	F:actin binding
BB454ONE003410	0
BB454ONE003411	3	C:cell part; P:metabolic process; F:catalytic activity
BB454ONE003414	3	F:ATPase activity, coupled to transmembrane movement of substances; P:transport; F:nucleotide binding
BB454ONE003416	2	F:endodeoxyribonuclease activity, producing 5'-phosphomonoesters; P:DNA catabolic process
BB454ONE003418	6	C:extracellular region; F:chitin binding; F:receptor activity; F:hydrolase activity, acting on carbon-nitrogen (but not peptide) bonds; P:chitin metabolic process; P:signal transduction
BB454ONE003419	10	P:transmembrane transport; F:calcium ion binding; C:integral to membrane; F:receptor activity; P:cellular calcium ion homeostasis; P:calcium ion transport; C:endoplasmic reticulum membrane; F:ryanodine-sensitive calcium-release channel activity; P:muscle
BB454ONE003420	8	P:transmembrane transport; C:integral to peroxisomal membrane; P:peroxisome organization; C:mitochondrial inner membrane; F:ATPase activity, coupled to transmembrane movement of substances; F:ATP binding; F:protein binding; P:peroxisomal long-chain fatty
BB454ONE003423	8	F:lipase activity; P:response to hormone stimulus; P:lipid catabolic process; P:multicellular organismal process; F:carboxylesterase activity; C:extracellular region; P:developmental process; C:membrane
BB454ONE003424	11	P:cysteine metabolic process; F:pyridoxal phosphate binding; P:iron-sulfur cluster assembly; F:cystathionine gamma-lyase activity; F:cysteine desulfurase activity; P:alanine biosynthetic process; C:mitochondrion; P:glycine metabolic process; P:methionine
BB454ONE003425	7	P:mitotic spindle elongation; C:cytoplasm; C:proteasome core complex; P:cell proliferation; P:ubiquitin-dependent protein catabolic process; C:nucleus; F:threonine-type endopeptidase activity
BB454ONE003427	0
BB454ONE003428	0
BB454ONE003429	0
BB454ONE003432	4	P:protein folding; C:prefoldin complex; F:unfolded protein binding; C:nucleus
BB454ONE003434	20	P:locomotion involved in locomotory behavior; P:regulation of alternative nuclear mRNA splicing, via spliceosome; P:startle response; P:sex differentiation; P:chitin-based embryonic cuticle biosynthetic process; P:protein amino acid autophosphorylation; F
BB454ONE003436	8	C:cytoplasm; F:transferase activity, transferring sulfur-containing groups; F:glutathione dehydrogenase (ascorbate) activity; F:glutathione transferase activity; F:pyrimidodiazepine synthase activity; P:electron transport; P:glutathione metabolic process;
BB454ONE003440	4	P:transport; P:cellular process; C:membrane; C:mitochondrion
BB454ONE003441	8	P:apical protein localization; P:asymmetric protein localization involved in cell fate determination; P:induction of apoptosis; F:protein binding; P:JNK cascade; P:defense response to Gram-negative bacterium; C:membrane; P:immune response
BB454ONE003442	10	C:cytoplasm; P:N-terminal protein amino acid acetylation; F:protein binding; P:mannose metabolic process; F:peptide alpha-N-acetyltransferase activity; C:nucleus; F:mannose-6-phosphate isomerase activity; F:ribosome binding; P:acyl-carrier-protein biosynt
BB454ONE003443	2	F:translation release factor activity; P:translational termination
BB454ONE003444	4	F:molecular_function; F:binding; P:biological_process; C:cellular_component
BB454ONE003445	8	P:rRNA processing; P:ribosomal large subunit biogenesis; F:structural constituent of ribosome; P:translational elongation; F:protein binding; C:cytosolic large ribosomal subunit; C:nucleus; F:5S rRNA binding
BB454ONE003446	0
BB454ONE003447	0
BB454ONE003448	0
BB454ONE003449	4	F:peptidase inhibitor activity; F:peptidase activity; F:serine-type endopeptidase inhibitor activity; C:extracellular region
BB454ONE003450	0
BB454ONE003452	1	C:mitochondrion
BB454ONE003455	7	C:integral to membrane; P:sodium ion transport; C:membrane; P:transmembrane transport; P:ion transport; F:transporter activity; P:transport
BB454ONE003456	1	F:hydrolase activity
BB454ONE003457	34	P:regulation of cell shape; P:establishment or maintenance of cell polarity; P:compound eye retinal cell programmed cell death; C:catenin complex; P:Wnt receptor signaling pathway; P:heart development; P:oocyte localization during germarium-derived egg ch
BB454ONE003458	9	F:protein homodimerization activity; C:mitochondrion; C:cytoplasm; F:adenyl-nucleotide exchange factor activity; C:mitochondrial matrix; F:protein binding; F:chaperone binding; P:protein import into mitochondrial matrix; P:protein folding
BB454ONE003459	6	P:transport; P:circadian sleep/wake cycle; P:biogenic amine catabolic process; F:N-acetyltransferase activity; P:catecholamine metabolic process; P:acyl-carrier-protein biosynthetic process
BB454ONE003460	5	P:regulation of apoptosis; C:intracellular membrane-bounded organelle; C:cytoplasmic part; F:cysteine-type endopeptidase activity; P:proteolysis
BB454ONE003461	3	F:transporter activity; C:intracellular; P:transport
BB454ONE003464	1	C:cytoplasmic part
BB454ONE003465	6	C:extracellular region; F:zinc ion binding; F:acid phosphatase activity; F:iron ion binding; P:riboflavin metabolic process; P:hexachlorocyclohexane metabolic process
BB454ONE003466	1	C:mitochondrial inner membrane
BB454ONE003469	9	C:neuromuscular junction; F:amino acid transmembrane transporter activity; P:glutamine transport; P:taurine transport; P:male courtship behavior; C:integral to membrane; P:chemosensory behavior; P:glutamate secretion; P:L-glutamate transport
BB454ONE003470	2	F:odorant binding; P:transport
BB454ONE003471	1	F:kinase activity
BB454ONE003473	6	P:leg disc development; P:negative regulation of antimicrobial humoral response; F:transcription corepressor activity; F:single-stranded DNA binding; C:transcription factor complex; P:negative regulation of transcription
BB454ONE003475	1	F:hydrolase activity
BB454ONE003476	4	C:membrane; P:transmembrane transport; F:transporter activity; P:transport
BB454ONE003477	2	F:catalytic activity; P:metabolic process
BB454ONE003478	0
BB454ONE003479	5	C:cytoplasm; C:ruffle; C:lamellipodium; F:protein binding; P:receptor-mediated endocytosis
BB454ONE003480	4	P:protein folding; F:unfolded protein binding; P:response to stress; F:heat shock protein binding
BB454ONE003483	1	F:zinc ion binding
BB454ONE003487	2	C:small nuclear ribonucleoprotein complex; C:nucleolus
BB454ONE003488	0
BB454ONE003490	0
BB454ONE003495	1	C:membrane
BB454ONE003496	8	C:cytoplasm; F:endopeptidase activity; C:proteasome regulatory particle, base subcomplex; P:cellular response to DNA damage stimulus; F:ATPase activity; P:ubiquitin-dependent protein catabolic process; F:ATP binding; C:nucleus
BB454ONE003497	1	C:integral to membrane
BB454ONE003498	3	F:metal ion binding; F:nucleic acid binding; F:zinc ion binding
BB454ONE003499	1	F:hydrolase activity
BB454ONE003501	1	P:intracellular signaling cascade
BB454ONE003502	6	P:iron-sulfur cluster assembly; F:iron-sulfur cluster binding; P:endocrine process; F:iron ion binding; C:mitochondrion; F:structural molecule activity
BB454ONE003503	0
BB454ONE003505	5	F:molecular_function; F:binding; P:biological_process; C:nucleus; C:cellular_component
BB454ONE003506	6	F:zinc ion binding; F:nucleic acid binding; P:regulation of alternative nuclear mRNA splicing, via spliceosome; P:mitotic spindle organization; C:snRNP U1; C:snRNP U11
BB454ONE003507	4	F:zinc ion binding; F:peptidase activity; F:serine-type endopeptidase inhibitor activity; C:nucleus
BB454ONE003508	0
BB454ONE003509	5	F:metal ion binding; F:zinc ion binding; F:protein binding; C:nucleus; C:nucleolus
BB454ONE003510	3	P:cellular metabolic process; F:hydrolase activity; F:transferase activity
BB454ONE003511	1	F:binding
BB454ONE003513	3	F:molecular_function; P:biological_process; C:cellular_component
BB454ONE003516	4	C:ribosome; F:structural constituent of ribosome; P:translation; P:ribosome biogenesis
BB454ONE003518	0
BB454ONE003519	1	P:transmembrane transport
BB454ONE003520	5	P:cytokine-mediated signaling pathway; P:regulation of transcription; F:protein binding; P:sex differentiation; C:nucleus
BB454ONE003521	2	F:acyl-CoA binding; F:binding
BB454ONE003523	1	P:induction of apoptosis by intracellular signals
BB454ONE003524	9	C:ribosome; F:structural constituent of ribosome; F:protein binding; P:protein ubiquitination; F:ubiquitin-protein ligase activity; F:zinc ion binding; P:translation; C:ubiquitin ligase complex; P:ribosome biogenesis
BB454ONE003525	2	C:mitochondrion; C:ribonucleoprotein complex
BB454ONE003526	0
BB454ONE003527	2	F:catalytic activity; P:metabolic process
BB454ONE003528	2	C:membrane; C:mitochondrion
BB454ONE003529	0
BB454ONE003532	0
BB454ONE003533	2	F:hydrolase activity; P:salivary gland cell autophagic cell death
BB454ONE003535	1	P:protein folding
BB454ONE003536	6	F:pheromone binding; F:phenylalkylamine binding; F:odorant binding; P:sensory perception of chemical stimulus; C:extracellular region; P:transport
BB454ONE003537	3	F:oxidoreductase activity; P:oxidation reduction; F:binding
BB454ONE003538	10	F:taurine:sodium symporter activity; P:dicarboxylic acid transport; F:sodium:dicarboxylate symporter activity; C:plasma membrane; P:taurine transport; F:L-aspartate transmembrane transporter activity; P:cation transport; P:neurotransmitter transport; P:an
BB454ONE003539	5	F:cytochrome-c oxidase activity; C:mitochondrion; P:mitochondrial electron transport, cytochrome c to oxygen; P:proton transport; C:respiratory chain complex IV
BB454ONE003541	0
BB454ONE003542	10	F:NADH dehydrogenase (ubiquinone) activity; C:mitochondrial respiratory chain complex I; F:4 iron, 4 sulfur cluster binding; F:NAD or NADH binding; P:mitochondrial electron transport, NADH to ubiquinone; F:FMN binding; F:iron ion binding; P:ubiquinone bio
BB454ONE003543	11	C:cytosol; C:extrinsic to membrane; F:hydrogen-exporting ATPase activity, phosphorylative mechanism; F:hydrogen ion transporting ATP synthase activity, rotational mechanism; C:vacuolar proton-transporting V-type ATPase, V1 domain; P:ATP synthesis coupled
[truncated: 14,384 more rows]
