# Supplementary material for: Transcriptomics of the Bed Bug (Cimex lectularius)
Source: PLoS One. 2011 Jan 19;6(1):e16336. doi: 10.1371/journal.pone.0016336 (PMC3023805; doi:10.1371/journal.pone.0016336)
Supplement: Table S2 — KEGG summary of C. lectularius sequences. (XLSX) [file pone.0016336.s002.xlsx]

## Sheet: bb_454new_kegg_CLEANED
KEGG pathway	KEGG map ID	Number of sequence	Sequence IDs
Glycolysis / Gluconeogenesis	map00010	58	BB454ONE026918; BB454ONE019204; BB454ONE014543; BB454ONE009482; BB454ONE017546; BB454ONE003568; BB454ONE003694; BB454ONE021609; BB454ONE013669; BB454ONE025086; BB454ONE022956; BB454ONE017649; BB454ONE032258; BB454ONE000999; BB454ONE022951; BB454ONE001328; BB454ONE004775; BB454ONE024042; BB454ONE029336; BB454ONE006051; BB454ONE023134; BB454ONE002310; BB454ONE000870; BB454ONE025125; BB454ONE015803;…
Citrate cycle (TCA cycle)	map00020	70	BB454ONE030491; BB454ONE020104; BB454ONE013539; BB454ONE018223; BB454ONE017720; BB454ONE003694; BB454ONE002712; BB454ONE019441; BB454ONE002167; BB454ONE005720; BB454ONE007853; BB454ONE013247; BB454ONE003839; BB454ONE005083; BB454ONE020840; BB454ONE002965; BB454ONE034576; BB454ONE003077; BB454ONE000812; BB454ONE025553; BB454ONE004295; BB454ONE017232; BB454ONE003664; BB454ONE025764; BB454ONE002957;…
Pentose phosphate pathway	map00030	24	BB454ONE007582; BB454ONE030979; BB454ONE025028; BB454ONE024022; BB454ONE003794; BB454ONE004706; BB454ONE025443; BB454ONE002625; BB454ONE024651; BB454ONE002885; BB454ONE004329; BB454ONE022063; BB454ONE013669; BB454ONE006658; BB454ONE025125; BB454ONE015803; BB454ONE010821; BB454ONE011967; BB454ONE005308; BB454ONE012796; BB454ONE014814; BB454ONE013646; BB454ONE003013; BB454ONE002927
Pentose and glucuronate interconversions	map00040	7	BB454ONE033328; BB454ONE008426; BB454ONE006280; BB454ONE024551; BB454ONE006263; BB454ONE025505; BB454ONE034166
Fructose and mannose metabolism	map00051	21	BB454ONE002845; BB454ONE023397; BB454ONE012588; BB454ONE002625; BB454ONE024651; BB454ONE021408; BB454ONE002078; BB454ONE015022; BB454ONE002885; BB454ONE018288; BB454ONE013669; BB454ONE025125; BB454ONE015803; BB454ONE006405; BB454ONE032177; BB454ONE003442; BB454ONE010821; BB454ONE013646; BB454ONE003281; BB454ONE009326; BB454ONE010663
Galactose metabolism	map00052	12	BB454ONE029211; BB454ONE011185; BB454ONE008426; BB454ONE024551; BB454ONE006263; BB454ONE015803; BB454ONE034386; BB454ONE031994; BB454ONE013646; BB454ONE003281; BB454ONE010957; BB454ONE034166
Ascorbate and aldarate metabolism	map00053	19	BB454ONE003645; BB454ONE029336; BB454ONE002310; BB454ONE003436; BB454ONE033328; BB454ONE003562; BB454ONE022194; BB454ONE022517; BB454ONE003568; BB454ONE017649; BB454ONE016524; BB454ONE023134; BB454ONE031712; BB454ONE033744; BB454ONE034073; BB454ONE025505; BB454ONE024074; BB454ONE002333; BB454ONE025356
Fatty acid biosynthesis	map00061	9	BB454ONE010944; BB454ONE006167; BB454ONE034903; BB454ONE025553; BB454ONE016150; BB454ONE032829; BB454ONE035381; BB454ONE030332; BB454ONE003187
Fatty acid elongation in mitochondria	map00062	30	BB454ONE002859; BB454ONE033581; BB454ONE004377; BB454ONE003143; BB454ONE002867; BB454ONE002385; BB454ONE022567; BB454ONE004692; BB454ONE006068; BB454ONE022060; BB454ONE005968; BB454ONE001803; BB454ONE033346; BB454ONE023915; BB454ONE012723; BB454ONE030801; BB454ONE002199; BB454ONE007824; BB454ONE006893; BB454ONE030261; BB454ONE021259; BB454ONE007802; BB454ONE009248; BB454ONE023063; BB454ONE027955;…
Fatty acid metabolism	map00071	67	BB454ONE026593; BB454ONE014044; BB454ONE033581; BB454ONE026024; BB454ONE001139; BB454ONE004377; BB454ONE022505; BB454ONE001900; BB454ONE003143; BB454ONE007914; BB454ONE029336; BB454ONE002867; BB454ONE002385; BB454ONE002310; BB454ONE003225; BB454ONE022567; BB454ONE019403; BB454ONE003562; BB454ONE004692; BB454ONE006068; BB454ONE022060; BB454ONE022194; BB454ONE005968; BB454ONE033346; BB454ONE023915;…
Synthesis and degradation of ketone bodies	map00072	6	BB454ONE027174; BB454ONE001139; BB454ONE029977; BB454ONE022060; BB454ONE012723; BB454ONE027955
Primary bile acid biosynthesis	map00120	14	BB454ONE003143; BB454ONE002867; BB454ONE022567; BB454ONE006068; BB454ONE022060; BB454ONE005968; BB454ONE023915; BB454ONE007824; BB454ONE006280; BB454ONE021259; BB454ONE007802; BB454ONE027955; BB454ONE008852; BB454ONE008302
Ubiquinone and other terpenoid-quinone biosynthesis	map00130	2	BB454ONE000715; BB454ONE000716
Steroid hormone biosynthesis	map00140	7	BB454ONE002867; BB454ONE022567; BB454ONE033328; BB454ONE005968; BB454ONE009500; BB454ONE007802; BB454ONE009384
Oxidative phosphorylation	map00190	120	BB454ONE008678; BB454ONE030491; BB454ONE000489; BB454ONE000735; BB454ONE003593; BB454ONE017720; BB454ONE000877; BB454ONE008699; BB454ONE001164; BB454ONE002359; BB454ONE001420; BB454ONE007509; BB454ONE000734; BB454ONE005720; BB454ONE003697; BB454ONE001199; BB454ONE001496; BB454ONE003657; BB454ONE027693; BB454ONE005967; BB454ONE000740; BB454ONE035308; BB454ONE003542; BB454ONE025897; BB454ONE000701;…
Photosynthesis	map00195	33	BB454ONE000489; BB454ONE001420; BB454ONE000633; BB454ONE000612; BB454ONE002876; BB454ONE001573; BB454ONE000254; BB454ONE027888; BB454ONE009058; BB454ONE034002; BB454ONE000252; BB454ONE002782; BB454ONE000487; BB454ONE000255; BB454ONE000488; BB454ONE005589; BB454ONE002406; BB454ONE009010; BB454ONE000785; BB454ONE021269; BB454ONE011062; BB454ONE016813; BB454ONE000253; BB454ONE016977; BB454ONE000611;…
Purine metabolism	map00230	146	BB454ONE023596; BB454ONE013327; BB454ONE000315; BB454ONE002283; BB454ONE013662; BB454ONE024669; BB454ONE007582; BB454ONE030274; BB454ONE017929; BB454ONE024163; BB454ONE002229; BB454ONE008809; BB454ONE012716; BB454ONE026447; BB454ONE015817; BB454ONE011083; BB454ONE002301; BB454ONE034098; BB454ONE001067; BB454ONE019780; BB454ONE009997; BB454ONE002553; BB454ONE003230; BB454ONE005704; BB454ONE015959;…
Caffeine metabolism	map00232	8	BB454ONE008809; BB454ONE015931; BB454ONE003563; BB454ONE015032; BB454ONE011879; BB454ONE014066; BB454ONE005553; BB454ONE005073
Pyrimidine metabolism	map00240	96	BB454ONE017861; BB454ONE007021; BB454ONE013662; BB454ONE019212; BB454ONE030274; BB454ONE002229; BB454ONE015817; BB454ONE011083; BB454ONE006701; BB454ONE034098; BB454ONE019780; BB454ONE009997; BB454ONE003230; BB454ONE005704; BB454ONE000427; BB454ONE033652; BB454ONE022756; BB454ONE018617; BB454ONE011173; BB454ONE028334; BB454ONE012177; BB454ONE010271; BB454ONE001826; BB454ONE028681; BB454ONE002363;…
Alanine, aspartate and glutamate metabolism	map00250	31	BB454ONE033570; BB454ONE017929; BB454ONE019714; BB454ONE026712; BB454ONE002553; BB454ONE011552; BB454ONE029911; BB454ONE019208; BB454ONE010238; BB454ONE033799; BB454ONE003883; BB454ONE012889; BB454ONE025332; BB454ONE002754; BB454ONE002392; BB454ONE029274; BB454ONE002242; BB454ONE002325; BB454ONE002495; BB454ONE012229; BB454ONE015223; BB454ONE029583; BB454ONE003660; BB454ONE003248; BB454ONE025909;…
Tetracycline biosynthesis	map00253	2	BB454ONE034903; BB454ONE025553
Glycine, serine and threonine metabolism	map00260	30	BB454ONE003694; BB454ONE034749; BB454ONE003798; BB454ONE003990; BB454ONE002398; BB454ONE016791; BB454ONE021609; BB454ONE022956; BB454ONE000999; BB454ONE011914; BB454ONE033799; BB454ONE019960; BB454ONE003606; BB454ONE024904; BB454ONE003841; BB454ONE027949; BB454ONE003424; BB454ONE005853; BB454ONE015223; BB454ONE004896; BB454ONE030172; BB454ONE029133; BB454ONE003104; BB454ONE033394; BB454ONE014864;…
Cysteine and methionine metabolism	map00270	27	BB454ONE023798; BB454ONE003144; BB454ONE019714; BB454ONE024169; BB454ONE002882; BB454ONE019933; BB454ONE029911; BB454ONE002278; BB454ONE001285; BB454ONE029853; BB454ONE025332; BB454ONE002392; BB454ONE000730; BB454ONE003424; BB454ONE027949; BB454ONE009276; BB454ONE009775; BB454ONE034358; BB454ONE003660; BB454ONE004896; BB454ONE028672; BB454ONE030172; BB454ONE010928; BB454ONE003004; BB454ONE014864;…
Valine, leucine and isoleucine degradation	map00280	61	BB454ONE014044; BB454ONE003694; BB454ONE033581; BB454ONE029336; BB454ONE019403; BB454ONE003562; BB454ONE022060; BB454ONE033346; BB454ONE029457; BB454ONE023915; BB454ONE011765; BB454ONE012723; BB454ONE020809; BB454ONE001024; BB454ONE003568; BB454ONE006893; BB454ONE000999; BB454ONE030261; BB454ONE021259; BB454ONE008128; BB454ONE015832; BB454ONE023134; BB454ONE030272; BB454ONE006313; BB454ONE031712;…
Geraniol degradation	map00281	24	BB454ONE033581; BB454ONE022060; BB454ONE033346; BB454ONE023915; BB454ONE012723; BB454ONE006893; BB454ONE030261; BB454ONE021259; BB454ONE009248; BB454ONE027955; BB454ONE023063; BB454ONE033463; BB454ONE008852; BB454ONE008302; BB454ONE003143; BB454ONE002867; BB454ONE022567; BB454ONE004692; BB454ONE006068; BB454ONE005968; BB454ONE007824; BB454ONE007802; BB454ONE024062; BB454ONE020444
Valine, leucine and isoleucine biosynthesis	map00290	20	BB454ONE034749; BB454ONE004403; BB454ONE009160; BB454ONE017232; BB454ONE029457; BB454ONE020562; BB454ONE017546; BB454ONE025086; BB454ONE006313; BB454ONE031840; BB454ONE003812; BB454ONE028343; BB454ONE006626; BB454ONE019039; BB454ONE010545; BB454ONE003104; BB454ONE006051; BB454ONE001823; BB454ONE024402; BB454ONE002634
Lysine biosynthesis	map00300	5	BB454ONE031712; BB454ONE018428; BB454ONE013272; BB454ONE026753; BB454ONE002333
Lysine degradation	map00310	54	BB454ONE024939; BB454ONE002167; BB454ONE029336; BB454ONE001062; BB454ONE003562; BB454ONE022060; BB454ONE003664; BB454ONE034088; BB454ONE023301; BB454ONE033346; BB454ONE023915; BB454ONE012723; BB454ONE003568; BB454ONE010916; BB454ONE021259; BB454ONE023134; BB454ONE031855; BB454ONE031712; BB454ONE033744; BB454ONE034073; BB454ONE009248; BB454ONE023063; BB454ONE027955; BB454ONE033463; BB454ONE008852;…
Penicillin and cephalosporin biosynthesis	map00311	1	BB454ONE002995
Arginine and proline metabolism	map00330	52	BB454ONE023798; BB454ONE033570; BB454ONE019714; BB454ONE029336; BB454ONE003562; BB454ONE026249; BB454ONE024169; BB454ONE000837; BB454ONE019933; BB454ONE008687; BB454ONE029911; BB454ONE000248; BB454ONE000836; BB454ONE023851; BB454ONE003568; BB454ONE034212; BB454ONE011914; BB454ONE001909; BB454ONE001075; BB454ONE002278; BB454ONE023134; BB454ONE000249; BB454ONE012889; BB454ONE031712; BB454ONE033744;…
Histidine metabolism	map00340	17	BB454ONE029336; BB454ONE003562; BB454ONE003568; BB454ONE011914; BB454ONE023134; BB454ONE012576; BB454ONE023695; BB454ONE031712; BB454ONE033744; BB454ONE034073; BB454ONE019204; BB454ONE002310; BB454ONE022194; BB454ONE022517; BB454ONE017649; BB454ONE002812; BB454ONE002333
Tyrosine metabolism	map00350	27	BB454ONE019714; BB454ONE027671; BB454ONE000716; BB454ONE029911; BB454ONE021609; BB454ONE022956; BB454ONE011914; BB454ONE023134; BB454ONE012576; BB454ONE023695; BB454ONE006023; BB454ONE034073; BB454ONE025332; BB454ONE024904; BB454ONE002392; BB454ONE003814; BB454ONE014642; BB454ONE024841; BB454ONE019204; BB454ONE001930; BB454ONE003660; BB454ONE000715; BB454ONE004204; BB454ONE025049; BB454ONE024715;…
Phenylalanine metabolism	map00360	24	BB454ONE019714; BB454ONE000716; BB454ONE033231; BB454ONE029911; BB454ONE000752; BB454ONE011914; BB454ONE023134; BB454ONE012576; BB454ONE009159; BB454ONE023695; BB454ONE000921; BB454ONE034073; BB454ONE025332; BB454ONE002392; BB454ONE002602; BB454ONE019204; BB454ONE003660; BB454ONE000715; BB454ONE034754; BB454ONE025049; BB454ONE024715; BB454ONE000753; BB454ONE001740; BB454ONE006642
gamma-Hexachlorocyclohexane degradation	map00361	7	BB454ONE023097; BB454ONE022637; BB454ONE010254; BB454ONE028779; BB454ONE032209; BB454ONE027901; BB454ONE003465
Benzoate degradation via hydroxylation	map00362	10	BB454ONE033581; BB454ONE022060; BB454ONE023915; BB454ONE012723; BB454ONE006893; BB454ONE030261; BB454ONE021259; BB454ONE027955; BB454ONE007824; BB454ONE020444
Tryptophan metabolism	map00380	68	BB454ONE025982; BB454ONE007537; BB454ONE007205; BB454ONE029336; BB454ONE032590; BB454ONE003562; BB454ONE022060; BB454ONE003664; BB454ONE033346; BB454ONE017694; BB454ONE023915; BB454ONE023989; BB454ONE012723; BB454ONE029811; BB454ONE011400; BB454ONE003568; BB454ONE005659; BB454ONE000752; BB454ONE034780; BB454ONE011914; BB454ONE021259; BB454ONE002788; BB454ONE023134; BB454ONE004909; BB454ONE023695;…
Phenylalanine, tyrosine and tryptophan biosynthesis	map00400	9	BB454ONE019714; BB454ONE029911; BB454ONE000752; BB454ONE021853; BB454ONE025332; BB454ONE002392; BB454ONE003660; BB454ONE005346; BB454ONE000753
Novobiocin biosynthesis	map00401	5	BB454ONE019714; BB454ONE029911; BB454ONE025332; BB454ONE002392; BB454ONE003660
beta-Alanine metabolism	map00410	52	BB454ONE014044; BB454ONE023798; BB454ONE029336; BB454ONE019403; BB454ONE026712; BB454ONE003562; BB454ONE011552; BB454ONE033436; BB454ONE024169; BB454ONE022060; BB454ONE019933; BB454ONE033346; BB454ONE023915; BB454ONE011765; BB454ONE020809; BB454ONE019208; BB454ONE003568; BB454ONE021259; BB454ONE008128; BB454ONE015832; BB454ONE002278; BB454ONE023134; BB454ONE030272; BB454ONE007299; BB454ONE031712;…
Taurine and hypotaurine metabolism	map00430	5	BB454ONE029274; BB454ONE002242; BB454ONE032330; BB454ONE003004; BB454ONE006613
Phosphonate and phosphinate metabolism	map00440	3	BB454ONE000301; BB454ONE000300; BB454ONE006883
Selenoamino acid metabolism	map00450	17	BB454ONE003144; BB454ONE015959; BB454ONE001757; BB454ONE009054; BB454ONE003552; BB454ONE016319; BB454ONE000730; BB454ONE003424; BB454ONE027949; BB454ONE003644; BB454ONE004896; BB454ONE030172; BB454ONE010928; BB454ONE032330; BB454ONE014864; BB454ONE001018; BB454ONE000731
Cyanoamino acid metabolism	map00460	3	BB454ONE003841; BB454ONE029583; BB454ONE032330
D-Glutamine and D-glutamate metabolism	map00471	2	BB454ONE003248; BB454ONE003588
Glutathione metabolism	map00480	33	BB454ONE023798; BB454ONE003645; BB454ONE000663; BB454ONE004706; BB454ONE003436; BB454ONE003230; BB454ONE024169; BB454ONE019933; BB454ONE009876; BB454ONE000461; BB454ONE007977; BB454ONE002278; BB454ONE000227; BB454ONE011967; BB454ONE004838; BB454ONE004821; BB454ONE003814; BB454ONE020104; BB454ONE030979; BB454ONE005738; BB454ONE002729; BB454ONE022397; BB454ONE017333; BB454ONE002965; BB454ONE014021;…
Starch and sucrose metabolism	map00500	18	BB454ONE013001; BB454ONE025443; BB454ONE033328; BB454ONE011185; BB454ONE008426; BB454ONE004869; BB454ONE022105; BB454ONE024551; BB454ONE028920; BB454ONE006263; BB454ONE028729; BB454ONE025505; BB454ONE003281; BB454ONE016355; BB454ONE015196; BB454ONE009235; BB454ONE034166; BB454ONE002433
N-Glycan biosynthesis	map00510	17	BB454ONE004829; BB454ONE019527; BB454ONE004404; BB454ONE014355; BB454ONE008048; BB454ONE005241; BB454ONE003665; BB454ONE012798; BB454ONE012372; BB454ONE018903; BB454ONE016434; BB454ONE002266; BB454ONE020216; BB454ONE005721; BB454ONE001842; BB454ONE001218; BB454ONE008996
Other glycan degradation	map00511	5	BB454ONE029097; BB454ONE008545; BB454ONE031994; BB454ONE002158; BB454ONE022242
O-Glycan biosynthesis	map00512	2	BB454ONE009291; BB454ONE019312
High-mannose type N-glycan biosynthesis	map00513	2	BB454ONE020216; BB454ONE005721
O-Mannosyl glycan biosynthesis	map00514	2	BB454ONE004404; BB454ONE008996
Amino sugar and nucleotide sugar metabolism	map00520	26	BB454ONE002845; BB454ONE002553; BB454ONE008426; BB454ONE015022; BB454ONE012282; BB454ONE029097; BB454ONE013019; BB454ONE024551; BB454ONE006263; BB454ONE032194; BB454ONE034386; BB454ONE025505; BB454ONE003281; BB454ONE009326; BB454ONE010957; BB454ONE029211; BB454ONE023397; BB454ONE022242; BB454ONE002422; BB454ONE001893; BB454ONE032177; BB454ONE003442; BB454ONE003575; BB454ONE011693; BB454ONE034166;…
Streptomycin biosynthesis	map00521	1	BB454ONE003281
Butirosin and neomycin biosynthesis	map00524	1	BB454ONE003281
Glycosaminoglycan degradation	map00531	3	BB454ONE029097; BB454ONE031994; BB454ONE022242
Glycosaminoglycan biosynthesis - chondroitin sulfate	map00532	2	BB454ONE033132; BB454ONE027298
Glycosaminoglycan biosynthesis - heparan sulfate	map00534	4	BB454ONE011575; BB454ONE014132; BB454ONE011905; BB454ONE027298
Glycerolipid metabolism	map00561	34	BB454ONE010698; BB454ONE011434; BB454ONE029336; BB454ONE022449; BB454ONE000503; BB454ONE003562; BB454ONE016660; BB454ONE003568; BB454ONE001036; BB454ONE023134; BB454ONE019960; BB454ONE031712; BB454ONE033744; BB454ONE034073; BB454ONE021406; BB454ONE034518; BB454ONE013050; BB454ONE030094; BB454ONE002310; BB454ONE017796; BB454ONE035408; BB454ONE022194; BB454ONE026911; BB454ONE002435; BB454ONE002263;…
Inositol phosphate metabolism	map00562	21	BB454ONE006283; BB454ONE019019; BB454ONE029165; BB454ONE024863; BB454ONE016524; BB454ONE030272; BB454ONE002427; BB454ONE015416; BB454ONE012531; BB454ONE025356; BB454ONE032564; BB454ONE002981; BB454ONE012347; BB454ONE015901; BB454ONE023838; BB454ONE002789; BB454ONE014265; BB454ONE005633; BB454ONE020223; BB454ONE001028; BB454ONE024074
Glycosylphosphatidylinositol(GPI)-anchor biosynthesis	map00563	1	BB454ONE020170
Glycerophospholipid metabolism	map00564	28	BB454ONE020887; BB454ONE002753; BB454ONE016100; BB454ONE000503; BB454ONE000301; BB454ONE017306; BB454ONE016660; BB454ONE000300; BB454ONE002193; BB454ONE021406; BB454ONE027177; BB454ONE030094; BB454ONE007511; BB454ONE017796; BB454ONE035408; BB454ONE026911; BB454ONE000473; BB454ONE002789; BB454ONE012495; BB454ONE006883; BB454ONE009438; BB454ONE004177; BB454ONE021986; BB454ONE000474; BB454ONE008295;…
Ether lipid metabolism	map00565	5	BB454ONE016100; BB454ONE027177; BB454ONE030094; BB454ONE004177; BB454ONE008295
Arachidonic acid metabolism	map00590	11	BB454ONE000663; BB454ONE016100; BB454ONE002790; BB454ONE000227; BB454ONE004838; BB454ONE001901; BB454ONE003656; BB454ONE032330; BB454ONE004177; BB454ONE000226; BB454ONE000840
Linoleic acid metabolism	map00591	2	BB454ONE016100; BB454ONE004177
alpha-Linolenic acid metabolism	map00592	22	BB454ONE014044; BB454ONE033581; BB454ONE016100; BB454ONE022060; BB454ONE033346; BB454ONE023915; BB454ONE012723; BB454ONE006893; BB454ONE030261; BB454ONE021259; BB454ONE008128; BB454ONE012410; BB454ONE009248; BB454ONE027955; BB454ONE023063; BB454ONE033463; BB454ONE008302; BB454ONE004692; BB454ONE007824; BB454ONE004177; BB454ONE024062; BB454ONE020444
Sphingolipid metabolism	map00600	25	BB454ONE006184; BB454ONE008550; BB454ONE019338; BB454ONE018242; BB454ONE002335; BB454ONE011135; BB454ONE007795; BB454ONE002585; BB454ONE017870; BB454ONE035012; BB454ONE031994; BB454ONE008408; BB454ONE017457; BB454ONE006887; BB454ONE030094; BB454ONE019552; BB454ONE017313; BB454ONE010134; BB454ONE009500; BB454ONE014417; BB454ONE002485; BB454ONE002938; BB454ONE021516; BB454ONE027467; BB454ONE019041
Glycosphingolipid biosynthesis - globo series	map00603	2	BB454ONE029097; BB454ONE022242
Glycosphingolipid biosynthesis - ganglio series	map00604	3	BB454ONE029097; BB454ONE031994; BB454ONE022242
Pyruvate metabolism	map00620	56	BB454ONE003694; BB454ONE002712; BB454ONE029336; BB454ONE034903; BB454ONE003562; BB454ONE022060; BB454ONE008620; BB454ONE017232; BB454ONE000716; BB454ONE013248; BB454ONE012723; BB454ONE028217; BB454ONE017546; BB454ONE003568; BB454ONE025086; BB454ONE000999; BB454ONE023134; BB454ONE016947; BB454ONE000870; BB454ONE031840; BB454ONE002031; BB454ONE001353; BB454ONE031712; BB454ONE033744; BB454ONE001495;…
1- and 2-Methylnaphthalene degradation	map00624	4	BB454ONE021609; BB454ONE022956; BB454ONE024904; BB454ONE018101
Tetrachloroethene degradation	map00625	1	BB454ONE002790
Glyoxylate and dicarboxylate metabolism	map00630	22	BB454ONE023675; BB454ONE002712; BB454ONE019441; BB454ONE000812; BB454ONE008876; BB454ONE000811; BB454ONE019960; BB454ONE004420; BB454ONE014194; BB454ONE001495; BB454ONE002206; BB454ONE024942; BB454ONE018223; BB454ONE003839; BB454ONE001845; BB454ONE025764; BB454ONE023942; BB454ONE002449; BB454ONE002437; BB454ONE005669; BB454ONE026232; BB454ONE027253
1,2-Dichloroethane degradation	map00631	12	BB454ONE029336; BB454ONE003562; BB454ONE003568; BB454ONE023134; BB454ONE031712; BB454ONE033744; BB454ONE034073; BB454ONE002310; BB454ONE022194; BB454ONE022517; BB454ONE017649; BB454ONE002333
Benzoate degradation via CoA ligation	map00632	27	BB454ONE005720; BB454ONE022060; BB454ONE033346; BB454ONE023915; BB454ONE012723; BB454ONE021259; BB454ONE009248; BB454ONE023063; BB454ONE027955; BB454ONE033463; BB454ONE008852; BB454ONE008302; BB454ONE001139; BB454ONE003143; BB454ONE002867; BB454ONE022567; BB454ONE033950; BB454ONE004692; BB454ONE006068; BB454ONE005968; BB454ONE007824; BB454ONE004721; BB454ONE007802; BB454ONE001222; BB454ONE005897;…
Propanoate metabolism	map00640	55	BB454ONE014044; BB454ONE030491; BB454ONE029336; BB454ONE005083; BB454ONE034903; BB454ONE019403; BB454ONE026712; BB454ONE003562; BB454ONE011552; BB454ONE033436; BB454ONE022060; BB454ONE033346; BB454ONE023915; BB454ONE011168; BB454ONE011765; BB454ONE012723; BB454ONE020809; BB454ONE019208; BB454ONE003568; BB454ONE028662; BB454ONE021259; BB454ONE008128; BB454ONE015832; BB454ONE023134; BB454ONE030272;…
3-Chloroacrylic acid degradation	map00641	16	BB454ONE029336; BB454ONE003562; BB454ONE003568; BB454ONE021609; BB454ONE022956; BB454ONE023134; BB454ONE031712; BB454ONE033744; BB454ONE034073; BB454ONE024904; BB454ONE002310; BB454ONE022194; BB454ONE022517; BB454ONE017649; BB454ONE018101; BB454ONE002333
Ethylbenzene degradation	map00642	10	BB454ONE033581; BB454ONE022060; BB454ONE023915; BB454ONE012723; BB454ONE006893; BB454ONE030261; BB454ONE021259; BB454ONE027955; BB454ONE007824; BB454ONE020444
Styrene degradation	map00643	3	BB454ONE003814; BB454ONE001930; BB454ONE002823
Butanoate metabolism	map00650	52	BB454ONE005720; BB454ONE029336; BB454ONE026712; BB454ONE003562; BB454ONE011552; BB454ONE022060; BB454ONE017232; BB454ONE033346; BB454ONE023915; BB454ONE012723; BB454ONE019208; BB454ONE017546; BB454ONE003568; BB454ONE025086; BB454ONE021259; BB454ONE023134; BB454ONE031840; BB454ONE000892; BB454ONE031712; BB454ONE033744; BB454ONE034073; BB454ONE009248; BB454ONE023063; BB454ONE027955; BB454ONE029274;…
C5-Branched dibasic acid metabolism	map00660	6	BB454ONE005083; BB454ONE028662; BB454ONE008689; BB454ONE001882; BB454ONE002535; BB454ONE002644
One carbon pool by folate	map00670	13	BB454ONE023675; BB454ONE007021; BB454ONE001067; BB454ONE003609; BB454ONE014194; BB454ONE003841; BB454ONE024942; BB454ONE000993; BB454ONE001845; BB454ONE020841; BB454ONE027176; BB454ONE010372; BB454ONE006416
Methane metabolism	map00680	14	BB454ONE002704; BB454ONE033231; BB454ONE021609; BB454ONE002788; BB454ONE009159; BB454ONE000921; BB454ONE002602; BB454ONE003841; BB454ONE004370; BB454ONE034754; BB454ONE004982; BB454ONE018101; BB454ONE001740; BB454ONE006642
Carbon fixation in photosynthetic organisms	map00710	29	BB454ONE002712; BB454ONE032258; BB454ONE019714; BB454ONE003794; BB454ONE008620; BB454ONE008876; BB454ONE024651; BB454ONE011870; BB454ONE013248; BB454ONE002885; BB454ONE029911; BB454ONE010821; BB454ONE004420; BB454ONE002031; BB454ONE012796; BB454ONE001495; BB454ONE025332; BB454ONE002392; BB454ONE009482; BB454ONE003660; BB454ONE019653; BB454ONE002137; BB454ONE002625; BB454ONE018017; BB454ONE002449;…
Reductive carboxylate cycle (CO2 fixation)	map00720	26	BB454ONE013539; BB454ONE002712; BB454ONE019441; BB454ONE005720; BB454ONE005083; BB454ONE002957; BB454ONE007800; BB454ONE009876; BB454ONE007977; BB454ONE028662; BB454ONE008689; BB454ONE001882; BB454ONE001495; BB454ONE002535; BB454ONE002206; BB454ONE020104; BB454ONE007853; BB454ONE003839; BB454ONE002965; BB454ONE025764; BB454ONE023942; BB454ONE002449; BB454ONE005669; BB454ONE027253; BB454ONE002644;…
Thiamine metabolism	map00730	33	BB454ONE023596; BB454ONE024669; BB454ONE024163; BB454ONE012716; BB454ONE002301; BB454ONE022998; BB454ONE021564; BB454ONE023778; BB454ONE017739; BB454ONE006306; BB454ONE010371; BB454ONE002661; BB454ONE003350; BB454ONE029808; BB454ONE018673; BB454ONE005883; BB454ONE001719; BB454ONE003424; BB454ONE014858; BB454ONE025146; BB454ONE006291; BB454ONE009053; BB454ONE019965; BB454ONE016506; BB454ONE023062;…
Riboflavin metabolism	map00740	10	BB454ONE023097; BB454ONE027671; BB454ONE026350; BB454ONE022637; BB454ONE002341; BB454ONE024841; BB454ONE028779; BB454ONE032209; BB454ONE027901; BB454ONE003465
Vitamin B6 metabolism	map00750	2	BB454ONE011186; BB454ONE002524
Nicotinate and nicotinamide metabolism	map00760	6	BB454ONE001607; BB454ONE002151; BB454ONE012536; BB454ONE035212; BB454ONE023450; BB454ONE032766
Pantothenate and CoA biosynthesis	map00770	14	BB454ONE004403; BB454ONE028113; BB454ONE029457; BB454ONE001529; BB454ONE033999; BB454ONE006313; BB454ONE023497; BB454ONE002242; BB454ONE012229; BB454ONE006164; BB454ONE033207; BB454ONE007218; BB454ONE009351; BB454ONE001955
Lipoic acid metabolism	map00785	2	BB454ONE003255; BB454ONE009313
Folate biosynthesis	map00790	7	BB454ONE002633; BB454ONE000918; BB454ONE002477; BB454ONE026503; BB454ONE010254; BB454ONE003633; BB454ONE010372
Retinol metabolism	map00830	8	BB454ONE033328; BB454ONE010875; BB454ONE021609; BB454ONE022956; BB454ONE034073; BB454ONE024904; BB454ONE012067; BB454ONE018101
Porphyrin and chlorophyll metabolism	map00860	14	BB454ONE009107; BB454ONE009160; BB454ONE008892; BB454ONE033328; BB454ONE027076; BB454ONE003804; BB454ONE028932; BB454ONE014925; BB454ONE014722; BB454ONE001147; BB454ONE031254; BB454ONE029449; BB454ONE005923; BB454ONE012152
Terpenoid backbone biosynthesis	map00900	8	BB454ONE022060; BB454ONE012723; BB454ONE024155; BB454ONE027955; BB454ONE003863; BB454ONE001139; BB454ONE029977; BB454ONE033960
Indole alkaloid biosynthesis	map00901	2	BB454ONE023695; BB454ONE020702
Limonene and pinene degradation	map00903	24	BB454ONE029336; BB454ONE003562; BB454ONE022060; BB454ONE033346; BB454ONE023915; BB454ONE003568; BB454ONE021259; BB454ONE023134; BB454ONE031712; BB454ONE033744; BB454ONE034073; BB454ONE009248; BB454ONE027955; BB454ONE023063; BB454ONE033463; BB454ONE008302; BB454ONE002310; BB454ONE004692; BB454ONE022194; BB454ONE022517; BB454ONE007824; BB454ONE017649; BB454ONE002333; BB454ONE024062
Nitrogen metabolism	map00910	16	BB454ONE012889; BB454ONE002754; BB454ONE003424; BB454ONE027949; BB454ONE012229; BB454ONE029583; BB454ONE006907; BB454ONE003248; BB454ONE030172; BB454ONE025909; BB454ONE003588; BB454ONE011484; BB454ONE014864; BB454ONE020841; BB454ONE027176; BB454ONE018432
Sulfur metabolism	map00920	4	BB454ONE015959; BB454ONE003552; BB454ONE027949; BB454ONE001018
Caprolactam degradation	map00930	20	BB454ONE029336; BB454ONE022060; BB454ONE033346; BB454ONE023915; BB454ONE021259; BB454ONE009248; BB454ONE027955; BB454ONE023063; BB454ONE033463; BB454ONE008852; BB454ONE008302; BB454ONE003143; BB454ONE002867; BB454ONE022567; BB454ONE004692; BB454ONE006068; BB454ONE005968; BB454ONE007824; BB454ONE007802; BB454ONE024062
Phenylpropanoid biosynthesis	map00940	7	BB454ONE033231; BB454ONE009159; BB454ONE000921; BB454ONE002602; BB454ONE034754; BB454ONE001740; BB454ONE006642
Isoquinoline alkaloid biosynthesis	map00950	10	BB454ONE019714; BB454ONE027671; BB454ONE029911; BB454ONE011914; BB454ONE023695; BB454ONE025332; BB454ONE002392; BB454ONE024841; BB454ONE003660; BB454ONE004204
Tropane, piperidine and pyridine alkaloid biosynthesis	map00960	13	BB454ONE019714; BB454ONE022459; BB454ONE002704; BB454ONE029911; BB454ONE011567; BB454ONE013861; BB454ONE025332; BB454ONE002392; BB454ONE000961; BB454ONE003660; BB454ONE022695; BB454ONE000952; BB454ONE003423
Betalain biosynthesis	map00965	3	BB454ONE027671; BB454ONE023695; BB454ONE024841
Glucosinolate biosynthesis	map00966	2	BB454ONE029457; BB454ONE006313
Aminoacyl-tRNA biosynthesis	map00970	52	BB454ONE004867; BB454ONE019649; BB454ONE007205; BB454ONE005610; BB454ONE028233; BB454ONE019522; BB454ONE002766; BB454ONE009107; BB454ONE009160; BB454ONE001565; BB454ONE014812; BB454ONE026604; BB454ONE013389; BB454ONE017694; BB454ONE003750; BB454ONE016435; BB454ONE020562; BB454ONE003395; BB454ONE007181; BB454ONE027021; BB454ONE027076; BB454ONE004909; BB454ONE011981; BB454ONE001791; BB454ONE009054;…
Metabolism of xenobiotics by cytochrome P450	map00980	11	BB454ONE003436; BB454ONE033328; BB454ONE021609; BB454ONE022956; BB454ONE023134; BB454ONE012576; BB454ONE034073; BB454ONE024904; BB454ONE003814; BB454ONE019204; BB454ONE018101
Insect hormone biosynthesis	map00981	2	BB454ONE001171; BB454ONE005717
Drug metabolism - cytochrome P450	map00982	12	BB454ONE003436; BB454ONE033328; BB454ONE021609; BB454ONE022956; BB454ONE011914; BB454ONE023134; BB454ONE012576; BB454ONE034073; BB454ONE024904; BB454ONE003814; BB454ONE019204; BB454ONE018101
Drug metabolism - other enzymes	map00983	37	BB454ONE017861; BB454ONE019212; BB454ONE008809; BB454ONE022459; BB454ONE033328; BB454ONE002024; BB454ONE029786; BB454ONE002704; BB454ONE015931; BB454ONE015570; BB454ONE003080; BB454ONE003563; BB454ONE011567; BB454ONE000563; BB454ONE034788; BB454ONE013861; BB454ONE023497; BB454ONE015032; BB454ONE000961; BB454ONE000542; BB454ONE002769; BB454ONE012229; BB454ONE006164; BB454ONE025587; BB454ONE000956;…
Biosynthesis of unsaturated fatty acids	map01040	31	BB454ONE014044; BB454ONE002859; BB454ONE033581; BB454ONE004377; BB454ONE002385; BB454ONE022060; BB454ONE001425; BB454ONE033346; BB454ONE023915; BB454ONE012723; BB454ONE002199; BB454ONE006893; BB454ONE030261; BB454ONE021259; BB454ONE008128; BB454ONE002353; BB454ONE012410; BB454ONE009248; BB454ONE027955; BB454ONE023063; BB454ONE033463; BB454ONE008302; BB454ONE020278; BB454ONE004692; BB454ONE007193;…
Biosynthesis of phenylpropanoids	map01061	98	BB454ONE030491; BB454ONE026918; BB454ONE013539; BB454ONE003694; BB454ONE002712; BB454ONE019441; BB454ONE032258; BB454ONE002167; BB454ONE001328; BB454ONE019714; BB454ONE005720; BB454ONE025443; BB454ONE005083; BB454ONE000812; BB454ONE017232; BB454ONE003664; BB454ONE024651; BB454ONE002957; BB454ONE011870; BB454ONE023301; BB454ONE007800; BB454ONE011168; BB454ONE009876; BB454ONE002885; BB454ONE000811;…
Biosynthesis of terpenoids and steroids	map01062	93	BB454ONE030491; BB454ONE026918; BB454ONE013539; BB454ONE003694; BB454ONE002712; BB454ONE019441; BB454ONE032258; BB454ONE002167; BB454ONE001328; BB454ONE005720; BB454ONE025443; BB454ONE005083; BB454ONE000812; BB454ONE008620; BB454ONE017232; BB454ONE003664; BB454ONE002957; BB454ONE011870; BB454ONE013248; BB454ONE023301; BB454ONE007800; BB454ONE011168; BB454ONE009876; BB454ONE002885; BB454ONE000811;…
Biosynthesis of alkaloids derived from shikimate pathway	map01063	100	BB454ONE030491; BB454ONE026918; BB454ONE013539; BB454ONE003694; BB454ONE002712; BB454ONE019441; BB454ONE032258; BB454ONE002167; BB454ONE001328; BB454ONE005720; BB454ONE025443; BB454ONE005083; BB454ONE027671; BB454ONE000812; BB454ONE008620; BB454ONE017232; BB454ONE003664; BB454ONE002957; BB454ONE011870; BB454ONE013248; BB454ONE023301; BB454ONE007800; BB454ONE029457; BB454ONE011168; BB454ONE009876;…
Biosynthesis of alkaloids derived from ornithine, lysine and nicotinic acid	map01064	97	BB454ONE030491; BB454ONE026918; BB454ONE003694; BB454ONE002712; BB454ONE019441; BB454ONE032258; BB454ONE002167; BB454ONE001328; BB454ONE005720; BB454ONE019714; BB454ONE025443; BB454ONE005083; BB454ONE000812; BB454ONE008620; BB454ONE017232; BB454ONE003664; BB454ONE011870; BB454ONE013248; BB454ONE023301; BB454ONE011168; BB454ONE009876; BB454ONE002885; BB454ONE000811; BB454ONE029911; BB454ONE012077;…
Biosynthesis of alkaloids derived from histidine and purine	map01065	112	BB454ONE030491; BB454ONE026918; BB454ONE003694; BB454ONE002712; BB454ONE019441; BB454ONE032258; BB454ONE007582; BB454ONE017929; BB454ONE002167; BB454ONE004403; BB454ONE001328; BB454ONE005720; BB454ONE003794; BB454ONE004706; BB454ONE025443; BB454ONE005083; BB454ONE000812; BB454ONE008620; BB454ONE017232; BB454ONE003664; BB454ONE002024; BB454ONE011870; BB454ONE013248; BB454ONE029786; BB454ONE023301;…
Biosynthesis of alkaloids derived from terpenoid and polyketide	map01066	92	BB454ONE030491; BB454ONE026918; BB454ONE013539; BB454ONE003694; BB454ONE002712; BB454ONE019441; BB454ONE032258; BB454ONE002167; BB454ONE001328; BB454ONE005720; BB454ONE025443; BB454ONE005083; BB454ONE000812; BB454ONE008620; BB454ONE017232; BB454ONE003664; BB454ONE002957; BB454ONE011870; BB454ONE013248; BB454ONE023301; BB454ONE007800; BB454ONE011168; BB454ONE009876; BB454ONE002885; BB454ONE000811;…
Biosynthesis of plant hormones	map01070	146	BB454ONE014044; BB454ONE030491; BB454ONE026918; BB454ONE013539; BB454ONE003694; BB454ONE002712; BB454ONE033581; BB454ONE019441; BB454ONE032258; BB454ONE007582; BB454ONE002167; BB454ONE003144; BB454ONE004377; BB454ONE001328; BB454ONE005720; BB454ONE019714; BB454ONE002385; BB454ONE003794; BB454ONE004706; BB454ONE025443; BB454ONE005083; BB454ONE002882; BB454ONE000812; BB454ONE022060; BB454ONE017232;…
Metabolic pathways	map01100	743	BB454ONE008678; BB454ONE000489; BB454ONE013327; BB454ONE002633; BB454ONE009291; BB454ONE002283; BB454ONE033570; BB454ONE013662; BB454ONE000877; BB454ONE003694; BB454ONE002712; BB454ONE024669; BB454ONE019441; BB454ONE001420; BB454ONE002359; BB454ONE007582; BB454ONE030274; BB454ONE024163; BB454ONE004403; BB454ONE003798; BB454ONE025443; BB454ONE032590; BB454ONE002151; BB454ONE003436; BB454ONE034098;…
Phosphatidylinositol signaling system	map04070	24	BB454ONE015416; BB454ONE012531; BB454ONE015901; BB454ONE021586; BB454ONE029165; BB454ONE017796; BB454ONE002789; BB454ONE009438; BB454ONE014265; BB454ONE026589; BB454ONE020223; BB454ONE024863; BB454ONE002193; BB454ONE012347; BB454ONE026911; BB454ONE012495; BB454ONE005633; BB454ONE006283; BB454ONE019019; BB454ONE016660; BB454ONE002981; BB454ONE035408; BB454ONE023838; BB454ONE030686
mTOR signaling pathway	map04150	9	BB454ONE005661; BB454ONE014265; BB454ONE031484; BB454ONE009561; BB454ONE004833; BB454ONE019019; BB454ONE002715; BB454ONE016143; BB454ONE009727
T cell receptor signaling pathway	map04660	25	BB454ONE013495; BB454ONE007391; BB454ONE017869; BB454ONE022957; BB454ONE001890; BB454ONE003178; BB454ONE025843; BB454ONE010758; BB454ONE016398; BB454ONE007348; BB454ONE006311; BB454ONE018445; BB454ONE022749; BB454ONE012455; BB454ONE013165; BB454ONE008946; BB454ONE002874; BB454ONE004991; BB454ONE004773; BB454ONE020255; BB454ONE026724; BB454ONE004815; BB454ONE015824; BB454ONE010023; BB454ONE004177
