# Supplementary material for: Transcriptomics of the Bed Bug (Cimex lectularius)
Source: PLoS One. 2011 Jan 19;6(1):e16336. doi: 10.1371/journal.pone.0016336 (PMC3023805; doi:10.1371/journal.pone.0016336)
Supplement: Table S3 — Pfam domain search of C. lectularius sequences. (XLSX) [file pone.0016336.s003.xlsx]

## Sheet: Pfam
Sequence ID	Frame	Accession	E-value	Score	Domain ID	Domain description
BB454ONE000003	1	PF00115.13	1.5e-69	234.4	COX1	Cytochrome C and Quinol oxidase polypeptide I
BB454ONE000004	5	PF00153.20	1.9e-25	88	Mito_carr	Mitochondrial carrier protein
BB454ONE000005	4	PF00153.20	1.9e-25	88	Mito_carr	Mitochondrial carrier protein
BB454ONE000006	6	PF00153.20	1.9e-25	88	Mito_carr	Mitochondrial carrier protein
BB454ONE000007	6	PF00153.20	1.9e-25	88	Mito_carr	Mitochondrial carrier protein
BB454ONE000008	6	PF00153.20	1.9e-25	88	Mito_carr	Mitochondrial carrier protein
BB454ONE000009	5	PF00153.20	1.9e-25	88	Mito_carr	Mitochondrial carrier protein
BB454ONE000010	5	PF03392.6	1.1e-39	134	OS-D	Insect pheromone-binding family, A10/OS-D
BB454ONE000011	4	PF03392.6	1.1e-39	134	OS-D	Insect pheromone-binding family, A10/OS-D
BB454ONE000012	6	PF03392.6	1.7e-38	130.1	OS-D	Insect pheromone-binding family, A10/OS-D
BB454ONE000013	6	PF03392.6	1.7e-38	130.1	OS-D	Insect pheromone-binding family, A10/OS-D
BB454ONE000014	2	PF00116.13	2.3e-37	127.1	COX2	Cytochrome C oxidase subunit II, periplasmic domain
BB454ONE000014	2	PF02790.8	5.9e-20	70.7	COX2_TM	Cytochrome C oxidase subunit II, transmembrane domain
BB454ONE000015	2	PF00116.13	1.8e-37	127.5	COX2	Cytochrome C oxidase subunit II, periplasmic domain
BB454ONE000015	2	PF02790.8	4.7e-20	71	COX2_TM	Cytochrome C oxidase subunit II, transmembrane domain
BB454ONE000016	3	PF00379.16	6e-15	54.9	Chitin_bind_4	Insect cuticle protein
BB454ONE000017	3	PF00379.16	6e-15	54.9	Chitin_bind_4	Insect cuticle protein
BB454ONE000018	3	PF00379.16	6e-15	54.9	Chitin_bind_4	Insect cuticle protein
BB454ONE000019	3	PF00379.16	6e-15	54.9	Chitin_bind_4	Insect cuticle protein
BB454ONE000020	1	PF00119.13	3.8e-38	130.8	ATP-synt_A	ATP synthase A chain
BB454ONE000021	1	PF00119.13	5.7e-38	130.2	ATP-synt_A	ATP synthase A chain
BB454ONE000022	1	PF00119.13	2.2e-31	108.7	ATP-synt_A	ATP synthase A chain
BB454ONE000023	3	PF00119.13	9.6e-39	132.7	ATP-synt_A	ATP synthase A chain
BB454ONE000031	1	PF00146.14	1.1e-73	247.7	NADHdh	NADH dehydrogenase
BB454ONE000032	1	PF00499.13	4.9e-10	39	Oxidored_q3	NADH-ubiquinone/plastoquinone oxidoreductase chain 6
BB454ONE000033	6	PF00992.13	6e-35	119.8	Troponin	Troponin
BB454ONE000034	6	PF00992.13	1.4e-37	128.3	Troponin	Troponin
BB454ONE000035	5	PF00992.13	7.9e-38	129.1	Troponin	Troponin
BB454ONE000036	4	PF00992.13	1.4e-37	128.3	Troponin	Troponin
BB454ONE000037	4	PF00992.13	6e-35	119.8	Troponin	Troponin
BB454ONE000038	5	PF00992.13	3.3e-35	120.7	Troponin	Troponin
BB454ONE000039	4	PF00992.13	6e-06	26	Troponin	Troponin
BB454ONE000040	4	PF00992.13	3.1e-06	26.9	Troponin	Troponin
BB454ONE000041	4	PF00992.13	3.2e-06	26.9	Troponin	Troponin
BB454ONE000042	4	PF00992.13	6e-06	26	Troponin	Troponin
BB454ONE000043	6	PF00992.13	2.6e-06	27.1	Troponin	Troponin
BB454ONE000044	6	PF00992.13	2.5e-06	27.2	Troponin	Troponin
BB454ONE000045	6	PF00992.13	2.1e-06	27.5	Troponin	Troponin
BB454ONE000046	6	PF00992.13	2.2e-06	27.4	Troponin	Troponin
BB454ONE000047	4	PF00992.13	1.9e-06	27.6	Troponin	Troponin
BB454ONE000048	4	PF00992.13	4.9e-06	26.3	Troponin	Troponin
BB454ONE000049	4	PF00992.13	5.4e-06	26.1	Troponin	Troponin
BB454ONE000050	4	PF00992.13	1.9e-06	27.6	Troponin	Troponin
BB454ONE000051	6	PF00992.13	2.1e-06	27.4	Troponin	Troponin
BB454ONE000052	6	PF00992.13	2.1e-06	27.5	Troponin	Troponin
BB454ONE000053	6	PF00992.13	2.6e-06	27.2	Troponin	Troponin
BB454ONE000054	6	PF00992.13	3.1e-06	26.9	Troponin	Troponin
BB454ONE000069	6	PF00838.10	1.9e-62	209.8	TCTP	Translationally controlled tumour protein
BB454ONE000070	4	PF00838.10	1.9e-62	209.7	TCTP	Translationally controlled tumour protein
BB454ONE000071	6	PF00838.10	7.6e-58	194.8	TCTP	Translationally controlled tumour protein
BB454ONE000072	4	PF00838.10	7.8e-58	194.7	TCTP	Translationally controlled tumour protein
BB454ONE000073	5	PF00379.16	6.8e-15	54.7	Chitin_bind_4	Insect cuticle protein
BB454ONE000074	1	PF00428.12	1.7e-18	66.4	Ribosomal_60s	60s Acidic ribosomal protein
BB454ONE000075	1	PF00428.12	1.8e-18	66.3	Ribosomal_60s	60s Acidic ribosomal protein
BB454ONE000076	1	PF00428.12	3.6e-26	91	Ribosomal_60s	60s Acidic ribosomal protein
BB454ONE000077	3	PF00244.13	1.6e-112	374	14-3-3	14-3-3 protein
BB454ONE000078	3	PF00244.13	6.1e-112	372.1	14-3-3	14-3-3 protein
BB454ONE000079	3	PF00244.13	1.5e-112	374.1	14-3-3	14-3-3 protein
BB454ONE000080	3	PF00244.13	5.9e-112	372.1	14-3-3	14-3-3 protein
BB454ONE000081	1	PF00244.13	1.4e-112	374.1	14-3-3	14-3-3 protein
BB454ONE000082	1	PF00244.13	5.6e-112	372.2	14-3-3	14-3-3 protein
BB454ONE000085	1	PF00261.13	4e-91	304	Tropomyosin	Tropomyosin
BB454ONE000086	2	PF00022.12	2.9e-160	532.6	Actin	Actin
BB454ONE000087	2	PF00022.12	2.9e-160	532.6	Actin	Actin
BB454ONE000088	3	PF00022.12	2.9e-160	532.6	Actin	Actin
BB454ONE000089	3	PF00022.12	2.9e-160	532.6	Actin	Actin
BB454ONE000090	4	PF00379.16	4.2e-19	68.2	Chitin_bind_4	Insect cuticle protein
BB454ONE000091	4	PF00379.16	4.2e-19	68.2	Chitin_bind_4	Insect cuticle protein
BB454ONE000092	4	PF00379.16	4.2e-19	68.2	Chitin_bind_4	Insect cuticle protein
BB454ONE000093	4	PF00379.16	4.1e-19	68.2	Chitin_bind_4	Insect cuticle protein
BB454ONE000094	4	PF00379.16	4.1e-19	68.2	Chitin_bind_4	Insect cuticle protein
BB454ONE000095	4	PF00379.16	4.1e-19	68.2	Chitin_bind_4	Insect cuticle protein
BB454ONE000103	1	PF00067.15	2.1e-79	266.8	p450	Cytochrome P450
BB454ONE000104	1	PF00067.15	1.4e-78	264.2	p450	Cytochrome P450
BB454ONE000105	3	PF00067.15	4.1e-80	269.2	p450	Cytochrome P450
BB454ONE000106	3	PF00067.15	2.7e-79	266.5	p450	Cytochrome P450
BB454ONE000108	3	PF00067.15	1.5e-06	26.7	p450	Cytochrome P450
BB454ONE000122	5	PF00067.15	5.7e-81	272	p450	Cytochrome P450
BB454ONE000123	6	PF00067.15	2.1e-80	270.2	p450	Cytochrome P450
BB454ONE000124	5	PF00067.15	5.7e-81	272	p450	Cytochrome P450
BB454ONE000125	5	PF00067.15	4.3e-60	203.2	p450	Cytochrome P450
BB454ONE000126	6	PF00067.15	2.1e-80	270.2	p450	Cytochrome P450
BB454ONE000131	4	PF00361.13	1.2e-42	145.7	Oxidored_q1	NADH-Ubiquinone/plastoquinone (complex I), various chains
BB454ONE000132	6	PF00361.13	1.2e-42	145.7	Oxidored_q1	NADH-Ubiquinone/plastoquinone (complex I), various chains
BB454ONE000136	4	PF00510.11	1.3e-74	250.6	COX3	Cytochrome c oxidase subunit III
BB454ONE000136	4	PF00507.12	5.8e-25	86.7	Oxidored_q4	NADH-ubiquinone/plastoquinone oxidoreductase, chain 3
BB454ONE000137	5	PF00510.11	9.8e-75	251	COX3	Cytochrome c oxidase subunit III
BB454ONE000137	5	PF00507.12	4.8e-25	87	Oxidored_q4	NADH-ubiquinone/plastoquinone oxidoreductase, chain 3
BB454ONE000138	4	PF00510.11	4.3e-75	252.1	COX3	Cytochrome c oxidase subunit III
BB454ONE000139	6	PF00736.12	1.8e-33	113.7	EF1_GNE	EF-1 guanine nucleotide exchange domain
BB454ONE000139	6	PF10587.2	1.2e-11	44.2	EF-1_beta_acid	Eukaryotic elongation factor 1 beta central acidic region
BB454ONE000140	6	PF00736.12	1.5e-33	114	EF1_GNE	EF-1 guanine nucleotide exchange domain
BB454ONE000140	6	PF10587.2	1e-11	44.4	EF-1_beta_acid	Eukaryotic elongation factor 1 beta central acidic region
BB454ONE000141	6	PF00736.12	1.4e-33	114.1	EF1_GNE	EF-1 guanine nucleotide exchange domain
BB454ONE000141	6	PF10587.2	9.6e-12	44.5	EF-1_beta_acid	Eukaryotic elongation factor 1 beta central acidic region
BB454ONE000142	6	PF00736.12	1.4e-33	114	EF1_GNE	EF-1 guanine nucleotide exchange domain
BB454ONE000142	6	PF10587.2	1e-11	44.4	EF-1_beta_acid	Eukaryotic elongation factor 1 beta central acidic region
BB454ONE000143	6	PF00736.12	1.3e-33	114.2	EF1_GNE	EF-1 guanine nucleotide exchange domain
BB454ONE000143	6	PF10587.2	9.3e-12	44.5	EF-1_beta_acid	Eukaryotic elongation factor 1 beta central acidic region
BB454ONE000144	6	PF00736.12	1.7e-33	113.8	EF1_GNE	EF-1 guanine nucleotide exchange domain
BB454ONE000144	6	PF10587.2	1.1e-11	44.2	EF-1_beta_acid	Eukaryotic elongation factor 1 beta central acidic region
BB454ONE000145	6	PF02020.11	4.3e-23	80.7	W2	eIF4-gamma/eIF5/eIF2-epsilon
BB454ONE000146	6	PF02020.11	2.5e-23	81.5	W2	eIF4-gamma/eIF5/eIF2-epsilon
BB454ONE000147	6	PF02020.11	3.9e-23	80.8	W2	eIF4-gamma/eIF5/eIF2-epsilon
BB454ONE000148	6	PF02020.11	2e-23	81.7	W2	eIF4-gamma/eIF5/eIF2-epsilon
BB454ONE000149	3	PF00808.16	6.9e-21	73.7	CBFD_NFYB_HMF	Histone-like transcription factor (CBF/NF-Y) and archaeal histone
BB454ONE000149	3	PF00125.17	8.3e-12	44.7	Histone	Core histone H2A/H2B/H3/H4
BB454ONE000150	1	PF00808.16	7.5e-21	73.6	CBFD_NFYB_HMF	Histone-like transcription factor (CBF/NF-Y) and archaeal histone
BB454ONE000150	1	PF00125.17	9e-12	44.6	Histone	Core histone H2A/H2B/H3/H4
BB454ONE000151	2	PF06220.5	8.7e-13	47.2	zf-U1	U1 zinc finger
BB454ONE000152	4	PF00230.13	1.1e-46	158.8	MIP	Major intrinsic protein
BB454ONE000153	5	PF00230.13	1.1e-46	158.8	MIP	Major intrinsic protein
BB454ONE000154	4	PF00230.13	1.1e-46	158.7	MIP	Major intrinsic protein
BB454ONE000155	4	PF00230.13	1.1e-46	158.8	MIP	Major intrinsic protein
BB454ONE000156	5	PF00230.13	1.1e-46	158.7	MIP	Major intrinsic protein
BB454ONE000157	2	PF02466.12	1.2e-21	76.5	Tim17	Tim17/Tim22/Tim23 family
BB454ONE000158	2	PF02466.12	1.1e-21	76.7	Tim17	Tim17/Tim22/Tim23 family
BB454ONE000162	2	PF02958.13	1.6e-25	89.5	DUF227	Domain of unknown function (DUF227)
BB454ONE000162	2	PF07914.4	5e-11	41.5	DUF1679	Protein of unknown function (DUF1679)
BB454ONE000163	2	PF02958.13	1.4e-25	89.7	DUF227	Domain of unknown function (DUF227)
BB454ONE000163	2	PF07914.4	4.4e-11	41.7	DUF1679	Protein of unknown function (DUF1679)
BB454ONE000164	2	PF02958.13	9.4e-26	90.3	DUF227	Domain of unknown function (DUF227)
BB454ONE000164	2	PF07914.4	2.7e-11	42.4	DUF1679	Protein of unknown function (DUF1679)
BB454ONE000168	6	PF00379.16	2.9e-14	52.7	Chitin_bind_4	Insect cuticle protein
BB454ONE000169	6	PF00379.16	3.3e-14	52.5	Chitin_bind_4	Insect cuticle protein
BB454ONE000170	1	PF01290.13	1e-15	56.7	Thymosin	Thymosin beta-4 family
BB454ONE000171	1	PF01290.13	9.2e-16	56.8	Thymosin	Thymosin beta-4 family
BB454ONE000172	1	PF01290.13	5.6e-15	54.3	Thymosin	Thymosin beta-4 family
BB454ONE000173	1	PF01290.13	4.9e-15	54.5	Thymosin	Thymosin beta-4 family
BB454ONE000174	2	PF06703.4	2.3e-46	157	SPC25	Microsomal signal peptidase 25 kDa subunit (SPC25)
BB454ONE000175	3	PF06703.4	2.3e-46	157	SPC25	Microsomal signal peptidase 25 kDa subunit (SPC25)
BB454ONE000176	1	PF06703.4	2.3e-46	157	SPC25	Microsomal signal peptidase 25 kDa subunit (SPC25)
BB454ONE000177	2	PF01576.12	0	1151.9	Myosin_tail_1	Myosin tail
BB454ONE000177	2	PF00063.14	2.8e-65	220.3	Myosin_head	Myosin head (motor domain)
BB454ONE000178	1	PF01576.12	0	1152.1	Myosin_tail_1	Myosin tail
BB454ONE000179	2	PF01576.12	0	1152	Myosin_tail_1	Myosin tail
BB454ONE000179	2	PF00063.14	2.8e-65	220.3	Myosin_head	Myosin head (motor domain)
BB454ONE000180	1	PF01576.12	0	1152.1	Myosin_tail_1	Myosin tail
BB454ONE000181	2	PF02229.9	5.8e-28	96.1	PC4	Transcriptional Coactivator p15 (PC4)
BB454ONE000182	3	PF02229.9	7e-28	95.8	PC4	Transcriptional Coactivator p15 (PC4)
BB454ONE000183	2	PF02229.9	4.1e-28	96.6	PC4	Transcriptional Coactivator p15 (PC4)
BB454ONE000184	3	PF02229.9	5.2e-28	96.2	PC4	Transcriptional Coactivator p15 (PC4)
BB454ONE000185	5	PF00328.15	2.8e-38	131.8	Acid_phosphat_A	Histidine acid phosphatase
BB454ONE000186	5	PF00328.15	1.1e-38	133.1	Acid_phosphat_A	Histidine acid phosphatase
BB454ONE000202	6	PF01201.15	4.1e-37	126.9	Ribosomal_S8e	Ribosomal protein S8e
BB454ONE000203	4	PF01599.12	8.6e-27	92.4	Ribosomal_S27	Ribosomal protein S27a
BB454ONE000203	5	PF00240.16	2e-26	90.7	ubiquitin	Ubiquitin family
BB454ONE000203	5	PF11976.1	1.7e-14	52.9	Rad60-SLD	Ubiquitin-2 like Rad60 SUMO-like
BB454ONE000204	4	PF01599.12	8.3e-27	92.4	Ribosomal_S27	Ribosomal protein S27a
BB454ONE000204	5	PF00240.16	1.9e-26	90.8	ubiquitin	Ubiquitin family
BB454ONE000204	5	PF11976.1	1.6e-14	52.9	Rad60-SLD	Ubiquitin-2 like Rad60 SUMO-like
BB454ONE000205	6	PF01201.15	3.5e-37	127.1	Ribosomal_S8e	Ribosomal protein S8e
BB454ONE000218	1	PF08235.6	2.1e-06	27	LNS2	LNS2 (Lipin/Ned1/Smp2)
BB454ONE000219	1	PF08235.6	2e-06	27	LNS2	LNS2 (Lipin/Ned1/Smp2)
BB454ONE000226	6	PF00578.14	1.1e-37	128.2	AhpC-TSA	AhpC/TSA family
BB454ONE000226	6	PF10417.2	9.4e-14	50.4	1-cysPrx_C	C-terminal domain of 1-Cys peroxiredoxin
BB454ONE000226	6	PF08534.3	4.3e-13	48.7	Redoxin	Redoxin
BB454ONE000227	5	PF00578.14	1.3e-37	127.9	AhpC-TSA	AhpC/TSA family
BB454ONE000227	5	PF10417.2	1.1e-13	50.3	1-cysPrx_C	C-terminal domain of 1-Cys peroxiredoxin
BB454ONE000227	5	PF08534.3	5.4e-13	48.4	Redoxin	Redoxin
BB454ONE000228	6	PF01556.11	4.2e-19	68	DnaJ_C	DnaJ C terminal region
BB454ONE000229	6	PF01556.11	4.4e-25	87.2	DnaJ_C	DnaJ C terminal region
BB454ONE000233	4	PF09404.3	1.6e-17	62.7	DUF2003	Eukaryotic protein of unknown function (DUF2003)
BB454ONE000234	4	PF09404.3	4.7e-31	107.3	DUF2003	Eukaryotic protein of unknown function (DUF2003)
BB454ONE000235	5	PF09404.3	3.3e-08	32	DUF2003	Eukaryotic protein of unknown function (DUF2003)
BB454ONE000247	1	PF00696.21	1.2e-38	132.7	AA_kinase	Amino acid kinase family
BB454ONE000247	1	PF00171.15	5.1e-13	47.8	Aldedh	Aldehyde dehydrogenase family
BB454ONE000248	1	PF00696.21	1.2e-38	132.7	AA_kinase	Amino acid kinase family
BB454ONE000248	1	PF00171.15	5.1e-13	47.8	Aldedh	Aldehyde dehydrogenase family
BB454ONE000249	1	PF00696.21	1.2e-38	132.7	AA_kinase	Amino acid kinase family
BB454ONE000249	1	PF00171.15	5.1e-13	47.8	Aldedh	Aldehyde dehydrogenase family
BB454ONE000251	3	PF07690.9	7.4e-10	37.8	MFS_1	Major Facilitator Superfamily
BB454ONE000252	2	PF04627.6	3.1e-24	84.1	ATP-synt_Eps	Mitochondrial ATP synthase epsilon chain
BB454ONE000253	2	PF04627.6	2.8e-24	84.2	ATP-synt_Eps	Mitochondrial ATP synthase epsilon chain
BB454ONE000254	2	PF04627.6	2.8e-24	84.2	ATP-synt_Eps	Mitochondrial ATP synthase epsilon chain
BB454ONE000255	2	PF04627.6	2.5e-24	84.3	ATP-synt_Eps	Mitochondrial ATP synthase epsilon chain
BB454ONE000256	3	PF00076.15	2.8e-16	58.6	RRM_1	RNA recognition motif. (a.k.a. RRM, RBD, or RNP domain)
BB454ONE000257	3	PF00076.15	1.7e-16	59.2	RRM_1	RNA recognition motif. (a.k.a. RRM, RBD, or RNP domain)
BB454ONE000262	3	PF04089.7	2.2e-08	33.5	BRICHOS	BRICHOS domain
BB454ONE000265	3	PF04089.7	2.2e-08	33.5	BRICHOS	BRICHOS domain
BB454ONE000267	1	PF00550.18	1.3e-09	37.8	PP-binding	Phosphopantetheine attachment site
BB454ONE000268	1	PF00550.18	6.7e-10	38.7	PP-binding	Phosphopantetheine attachment site
BB454ONE000271	5	PF00935.12	4.5e-32	109.5	Ribosomal_L44	Ribosomal protein L44
BB454ONE000272	4	PF00935.12	3.5e-32	109.9	Ribosomal_L44	Ribosomal protein L44
BB454ONE000273	5	PF00935.12	3.9e-32	109.7	Ribosomal_L44	Ribosomal protein L44
BB454ONE000274	3	PF00935.12	3.5e-32	109.9	Ribosomal_L44	Ribosomal protein L44
BB454ONE000278	3	PF00023.23	6.9e-11	41	Ank	Ankyrin repeat
BB454ONE000279	5	PF00067.15	3.5e-84	282.6	p450	Cytochrome P450
BB454ONE000280	5	PF00067.15	2.1e-84	283.4	p450	Cytochrome P450
BB454ONE000285	2	PF05383.10	6.7e-22	76.7	La	La domain
BB454ONE000285	2	PF08777.4	5.1e-16	58.1	RRM_3	RNA binding motif
BB454ONE000287	1	PF08777.4	4.9e-16	58.1	RRM_3	RNA binding motif
BB454ONE000289	2	PF00361.13	7.4e-09	34.9	Oxidored_q1	NADH-Ubiquinone/plastoquinone (complex I), various chains
BB454ONE000292	1	PF00252.11	1.7e-30	105.2	Ribosomal_L16	Ribosomal protein L16p/L10e
BB454ONE000293	2	PF00252.11	1.6e-30	105.2	Ribosomal_L16	Ribosomal protein L16p/L10e
BB454ONE000294	1	PF00252.11	1.6e-30	105.2	Ribosomal_L16	Ribosomal protein L16p/L10e
BB454ONE000295	6	PF02330.9	1.1e-33	116.4	MAM33	Mitochondrial glycoprotein
BB454ONE000296	6	PF02330.9	9.5e-34	116.6	MAM33	Mitochondrial glycoprotein
BB454ONE000297	6	PF00085.13	1.4e-26	91.8	Thioredoxin	Thioredoxin
BB454ONE000298	5	PF00085.13	1.2e-26	92	Thioredoxin	Thioredoxin
BB454ONE000299	2	PF00177.14	2.6e-38	130.5	Ribosomal_S7	Ribosomal protein S7p/S5e
BB454ONE000304	6	PF00957.14	2.2e-10	39.7	Synaptobrevin	Synaptobrevin
BB454ONE000305	6	PF00957.14	1e-12	47.1	Synaptobrevin	Synaptobrevin
BB454ONE000313	6	PF00379.16	2.3e-15	56.2	Chitin_bind_4	Insect cuticle protein
BB454ONE000314	6	PF00379.16	2.2e-15	56.3	Chitin_bind_4	Insect cuticle protein
BB454ONE000315	4	PF00625.14	4.5e-64	214.9	Guanylate_kin	Guanylate kinase
BB454ONE000316	4	PF00625.14	4e-64	215	Guanylate_kin	Guanylate kinase
BB454ONE000318	1	PF00313.15	6.3e-11	41.5	CSD	'Cold-shock' DNA-binding domain
BB454ONE000319	4	PF00687.14	1.8e-09	36.9	Ribosomal_L1	Ribosomal protein L1p/L10e family
BB454ONE000319	5	PF00687.14	1.4e-32	112.4	Ribosomal_L1	Ribosomal protein L1p/L10e family
BB454ONE000322	6	PF00226.24	3.7e-25	87.1	DnaJ	DnaJ domain
BB454ONE000323	5	PF00226.24	4.7e-25	86.7	DnaJ	DnaJ domain
BB454ONE000326	1	PF00557.17	3e-33	114.9	Peptidase_M24	Metallopeptidase family M24
BB454ONE000326	2	PF06991.4	5.4e-27	94.4	MFAP1_C	Micro-fibrillar-associated protein 1 C-terminus
BB454ONE000327	1	PF00557.17	1.3e-33	116.1	Peptidase_M24	Metallopeptidase family M24
BB454ONE000328	2	PF00076.15	6.1e-22	76.7	RRM_1	RNA recognition motif. (a.k.a. RRM, RBD, or RNP domain)
BB454ONE000332	4	PF02320.9	2.8e-24	84.5	UCR_hinge	Ubiquinol-cytochrome C reductase hinge protein
BB454ONE000333	6	PF00022.12	1.6e-160	533.4	Actin	Actin
BB454ONE000334	5	PF00022.12	1.6e-160	533.5	Actin	Actin
BB454ONE000335	6	PF00022.12	1.4e-160	533.6	Actin	Actin
BB454ONE000336	1	PF01145.18	1.8e-24	86.3	Band_7	SPFH domain / Band 7 family
BB454ONE000337	1	PF01145.18	1.6e-24	86.4	Band_7	SPFH domain / Band 7 family
BB454ONE000338	1	PF00089.19	1.3e-06	27.8	Trypsin	Trypsin
BB454ONE000340	1	PF02453.10	7.9e-51	171.6	Reticulon	Reticulon
BB454ONE000341	3	PF02453.10	6.9e-51	171.8	Reticulon	Reticulon
BB454ONE000342	2	PF00106.18	2e-14	53.5	adh_short	short chain dehydrogenase
BB454ONE000342	2	PF08659.3	9.4e-07	28.3	KR	KR domain
BB454ONE000343	3	PF00106.18	7.7e-09	35.3	adh_short	short chain dehydrogenase
BB454ONE000344	2	PF11029.1	1.2e-11	44.9	DAZAP2	DAZ associated protein 2 (DAZAP2)
BB454ONE000348	2	PF00026.16	1e-58	198.8	Asp	Eukaryotic aspartyl protease
BB454ONE000350	1	PF05172.6	1.7e-17	62.7	MPPN	MPPN (rrm-like) domain
BB454ONE000350	6	PF07653.10	2.6e-10	39.3	SH3_2	Variant SH3 domain
BB454ONE000350	6	PF00018.21	2.7e-09	35.9	SH3_1	SH3 domain
BB454ONE000351	1	PF05172.6	1.6e-17	62.8	MPPN	MPPN (rrm-like) domain
BB454ONE000351	6	PF07653.10	3.7e-08	32.4	SH3_2	Variant SH3 domain
BB454ONE000351	6	PF00018.21	5.3e-06	25.4	SH3_1	SH3 domain
BB454ONE000361	2	PF04930.8	1.7e-29	101.7	FUN14	FUN14 family
BB454ONE000362	2	PF04930.8	2.9e-29	100.9	FUN14	FUN14 family
BB454ONE000363	1	PF00685.20	5.1e-13	48.7	Sulfotransfer_1	Sulfotransferase domain
BB454ONE000364	1	PF00685.20	1.1e-25	90.2	Sulfotransfer_1	Sulfotransferase domain
BB454ONE000365	4	PF01172.11	1.3e-06	27.7	SBDS	Shwachman-Bodian-Diamond syndrome (SBDS) protein
BB454ONE000366	5	PF09377.3	7.6e-39	131.9	SBDS_C	SBDS protein C-terminal domain
BB454ONE000366	5	PF01172.11	1.4e-33	114.1	SBDS	Shwachman-Bodian-Diamond syndrome (SBDS) protein
BB454ONE000368	4	PF00100.16	2e-15	56.7	Zona_pellucida	Zona pellucida-like domain
BB454ONE000369	1	PF00379.16	9.7e-08	31.8	Chitin_bind_4	Insect cuticle protein
BB454ONE000371	4	PF00626.15	6.3e-17	60.7	Gelsolin	Gelsolin repeat
BB454ONE000372	4	PF00626.15	5.3e-17	60.9	Gelsolin	Gelsolin repeat
BB454ONE000373	4	PF00626.15	6.1e-17	60.7	Gelsolin	Gelsolin repeat
BB454ONE000376	6	PF01144.16	2.2e-37	128	CoA_trans	Coenzyme A transferase
BB454ONE000377	5	PF01144.16	2.1e-37	128.1	CoA_trans	Coenzyme A transferase
BB454ONE000378	2	PF08246.5	5.8e-17	61.4	Inhibitor_I29	Cathepsin propeptide inhibitor domain (I29)
BB454ONE000379	2	PF08246.5	3.6e-16	58.8	Inhibitor_I29	Cathepsin propeptide inhibitor domain (I29)
BB454ONE000382	1	PF01250.10	1.9e-09	36.9	Ribosomal_S6	Ribosomal protein S6
BB454ONE000383	1	PF01250.10	1.2e-13	50.4	Ribosomal_S6	Ribosomal protein S6
BB454ONE000386	1	PF07258.7	2.8e-14	52.7	HCaRG	HCaRG protein
BB454ONE000387	1	PF07258.7	2.9e-14	52.6	HCaRG	HCaRG protein
BB454ONE000388	1	PF00034.14	5.5e-12	46	Cytochrom_C	Cytochrome c
BB454ONE000389	4	PF01607.17	5.2e-07	29.1	CBM_14	Chitin binding Peritrophin-A domain
BB454ONE000390	5	PF01607.17	5.2e-07	29.1	CBM_14	Chitin binding Peritrophin-A domain
BB454ONE000391	5	PF01607.17	5.1e-07	29.2	CBM_14	Chitin binding Peritrophin-A domain
BB454ONE000392	2	PF07647.10	1.6e-13	49.9	SAM_2	SAM domain (Sterile alpha motif)
BB454ONE000392	2	PF00536.23	5.2e-10	39	SAM_1	SAM domain (Sterile alpha motif)
BB454ONE000394	3	PF01282.12	2.6e-36	122.9	Ribosomal_S24e	Ribosomal protein S24e
BB454ONE000395	3	PF01282.12	2e-36	123.3	Ribosomal_S24e	Ribosomal protein S24e
BB454ONE000396	6	PF00089.19	7.3e-26	90.8	Trypsin	Trypsin
BB454ONE000397	6	PF00089.19	7.3e-51	172.5	Trypsin	Trypsin
BB454ONE000398	3	PF08583.3	1.6e-15	56.3	Cmc1	Cytochrome c oxidase biogenesis protein Cmc1 like
BB454ONE000399	3	PF08583.3	1.5e-10	40.4	Cmc1	Cytochrome c oxidase biogenesis protein Cmc1 like
BB454ONE000400	1	PF00411.12	2.3e-39	133.6	Ribosomal_S11	Ribosomal protein S11
BB454ONE000401	1	PF00411.12	2.2e-39	133.7	Ribosomal_S11	Ribosomal protein S11
BB454ONE000402	2	PF00089.19	3.4e-11	42.8	Trypsin	Trypsin
BB454ONE000403	2	PF00089.19	7.8e-09	35.1	Trypsin	Trypsin
BB454ONE000404	4	PF00112.16	6e-62	209	Peptidase_C1	Papain family cysteine protease
BB454ONE000404	4	PF08127.6	2.6e-16	58.6	Propeptide_C1	Peptidase family C1 propeptide
BB454ONE000405	4	PF00112.16	8.4e-61	205.3	Peptidase_C1	Papain family cysteine protease
BB454ONE000405	4	PF08127.6	2.4e-16	58.7	Propeptide_C1	Peptidase family C1 propeptide
BB454ONE000406	1	PF00023.23	3.8e-11	41.8	Ank	Ankyrin repeat
BB454ONE000407	3	PF00023.23	6.5e-13	47.4	Ank	Ankyrin repeat
BB454ONE000410	5	PF00153.20	2.4e-22	78.1	Mito_carr	Mitochondrial carrier protein
BB454ONE000411	6	PF00153.20	9.9e-08	31.2	Mito_carr	Mitochondrial carrier protein
BB454ONE000412	5	PF02961.7	5.3e-15	55.2	BAF	Barrier to autointegration factor
BB454ONE000412	6	PF02961.7	2.6e-16	59.3	BAF	Barrier to autointegration factor
BB454ONE000413	5	PF02961.7	1.6e-38	130.5	BAF	Barrier to autointegration factor
BB454ONE000414	1	PF00328.15	1.3e-13	50.7	Acid_phosphat_A	Histidine acid phosphatase
BB454ONE000415	1	PF00328.15	4.4e-13	48.9	Acid_phosphat_A	Histidine acid phosphatase
BB454ONE000418	5	PF03392.6	1.4e-39	133.5	OS-D	Insect pheromone-binding family, A10/OS-D
BB454ONE000419	6	PF03392.6	4.3e-40	135.2	OS-D	Insect pheromone-binding family, A10/OS-D
BB454ONE000420	2	PF00628.22	4.3e-10	38.8	PHD	PHD-finger
BB454ONE000421	2	PF00628.22	5.7e-10	38.4	PHD	PHD-finger
BB454ONE000426	1	PF00117.21	2.7e-22	78.8	GATase	Glutamine amidotransferase class-I
BB454ONE000427	1	PF00117.21	2.3e-22	79.1	GATase	Glutamine amidotransferase class-I
BB454ONE000428	4	PF00248.14	1.7e-25	89.1	Aldo_ket_red	Aldo/keto reductase family
BB454ONE000434	3	PF00112.16	1.1e-72	244.2	Peptidase_C1	Papain family cysteine protease
BB454ONE000434	3	PF08246.5	1.8e-09	37.4	Inhibitor_I29	Cathepsin propeptide inhibitor domain (I29)
BB454ONE000435	6	PF02460.11	8.4e-31	106.5	Patched	Patched family
BB454ONE000436	6	PF02460.11	1.5e-30	105.7	Patched	Patched family
BB454ONE000437	2	PF03372.16	7.6e-21	74	Exo_endo_phos	Endonuclease/Exonuclease/phosphatase family
BB454ONE000438	2	PF03372.16	1.8e-20	72.8	Exo_endo_phos	Endonuclease/Exonuclease/phosphatase family
BB454ONE000439	6	PF00294.17	3.2e-55	187	PfkB	pfkB family carbohydrate kinase
BB454ONE000440	5	PF00294.17	4.3e-43	147.2	PfkB	pfkB family carbohydrate kinase
BB454ONE000441	1	PF00026.16	9.8e-38	129.8	Asp	Eukaryotic aspartyl protease
BB454ONE000441	2	PF00026.16	1.9e-07	30.3	Asp	Eukaryotic aspartyl protease
BB454ONE000442	1	PF00026.16	5.4e-17	61.7	Asp	Eukaryotic aspartyl protease
BB454ONE000442	3	PF00026.16	4.8e-15	55.3	Asp	Eukaryotic aspartyl protease
BB454ONE000446	1	PF00379.16	5.5e-08	32.6	Chitin_bind_4	Insect cuticle protein
BB454ONE000447	2	PF02100.10	9.3e-27	94	ODC_AZ	Ornithine decarboxylase antizyme
BB454ONE000448	1	PF02100.10	7.9e-27	94.2	ODC_AZ	Ornithine decarboxylase antizyme
BB454ONE000449	4	PF02958.13	1.8e-21	76.2	DUF227	Domain of unknown function (DUF227)
BB454ONE000450	4	PF02958.13	1.2e-22	80.1	DUF227	Domain of unknown function (DUF227)
BB454ONE000451	4	PF00160.14	3.7e-45	153.5	Pro_isomerase	Cyclophilin type peptidyl-prolyl cis-trans isomerase/CLD
BB454ONE000452	6	PF00160.14	3.6e-45	153.5	Pro_isomerase	Cyclophilin type peptidyl-prolyl cis-trans isomerase/CLD
BB454ONE000453	4	PF00160.14	3.1e-45	153.8	Pro_isomerase	Cyclophilin type peptidyl-prolyl cis-trans isomerase/CLD
BB454ONE000457	6	PF00085.13	6e-19	67.3	Thioredoxin	Thioredoxin
BB454ONE000458	5	PF00085.13	5.1e-19	67.5	Thioredoxin	Thioredoxin
BB454ONE000459	1	PF00189.13	1.7e-16	59.9	Ribosomal_S3_C	Ribosomal protein S3, C-terminal domain
BB454ONE000460	3	PF00189.13	4.7e-16	58.4	Ribosomal_S3_C	Ribosomal protein S3, C-terminal domain
BB454ONE000461	2	PF07992.7	1.1e-08	34.6	Pyr_redox_2	Pyridine nucleotide-disulphide oxidoreductase
BB454ONE000461	3	PF00070.20	4.6e-09	36.2	Pyr_redox	Pyridine nucleotide-disulphide oxidoreductase
BB454ONE000461	3	PF07992.7	4.3e-07	29.3	Pyr_redox_2	Pyridine nucleotide-disulphide oxidoreductase
BB454ONE000462	2	PF07992.7	2.9e-24	85.4	Pyr_redox_2	Pyridine nucleotide-disulphide oxidoreductase
BB454ONE000462	2	PF00070.20	2.7e-14	53	Pyr_redox	Pyridine nucleotide-disulphide oxidoreductase
BB454ONE000463	6	PF00335.13	2.3e-44	151	Tetraspannin	Tetraspanin family
BB454ONE000464	5	PF00335.13	2.1e-44	151	Tetraspannin	Tetraspanin family
BB454ONE000465	6	PF01393.12	1.1e-28	98	Chromo_shadow	Chromo shadow domain
BB454ONE000465	6	PF00385.17	2.9e-17	61.7	Chromo	'chromo' (CHRromatin Organisation MOdifier) domain
BB454ONE000466	6	PF01393.12	1e-28	98.1	Chromo_shadow	Chromo shadow domain
BB454ONE000466	6	PF00385.17	2.8e-17	61.8	Chromo	'chromo' (CHRromatin Organisation MOdifier) domain
BB454ONE000468	6	PF07885.9	8.7e-23	79.5	Ion_trans_2	Ion channel
BB454ONE000469	5	PF00134.16	6.1e-09	35.2	Cyclin_N	Cyclin, N-terminal domain
BB454ONE000470	6	PF00134.16	6.5e-09	35.1	Cyclin_N	Cyclin, N-terminal domain
BB454ONE000471	3	PF01209.11	3.1e-17	62.1	Ubie_methyltran	ubiE/COQ5 methyltransferase family
BB454ONE000472	2	PF01209.11	6.5e-16	57.8	Ubie_methyltran	ubiE/COQ5 methyltransferase family
BB454ONE000474	3	PF01633.13	9.8e-46	155.6	Choline_kinase	Choline/ethanolamine kinase
BB454ONE000474	3	PF01636.16	1.4e-13	50.8	APH	Phosphotransferase enzyme family
BB454ONE000475	4	PF02238.8	7.1e-06	25.3	COX7a	Cytochrome c oxidase subunit VIIa
BB454ONE000481	1	PF05207.6	1.8e-13	49.5	zf-CSL	CSL zinc finger
BB454ONE000481	2	PF05207.6	2.5e-06	26.6	zf-CSL	CSL zinc finger
BB454ONE000482	1	PF05207.6	3.8e-25	86.9	zf-CSL	CSL zinc finger
BB454ONE000484	5	PF00379.16	3.3e-15	55.7	Chitin_bind_4	Insect cuticle protein
BB454ONE000485	6	PF00379.16	3.3e-15	55.7	Chitin_bind_4	Insect cuticle protein
BB454ONE000486	5	PF00379.16	9.1e-13	47.9	Chitin_bind_4	Insect cuticle protein
BB454ONE000487	1	PF00006.18	4.8e-63	212.2	ATP-synt_ab	ATP synthase alpha/beta family, nucleotide-binding domain
BB454ONE000487	1	PF00306.20	7.9e-26	90.4	ATP-synt_ab_C	ATP synthase alpha/beta chain, C terminal domain
BB454ONE000487	1	PF02874.16	2.8e-22	78.4	ATP-synt_ab_N	ATP synthase alpha/beta family, beta-barrel domain
BB454ONE000488	2	PF00006.18	4.7e-63	212.2	ATP-synt_ab	ATP synthase alpha/beta family, nucleotide-binding domain
BB454ONE000488	2	PF00306.20	7.8e-26	90.4	ATP-synt_ab_C	ATP synthase alpha/beta chain, C terminal domain
BB454ONE000488	2	PF02874.16	2.7e-22	78.4	ATP-synt_ab_N	ATP synthase alpha/beta family, beta-barrel domain
BB454ONE000489	1	PF00006.18	4e-63	212.4	ATP-synt_ab	ATP synthase alpha/beta family, nucleotide-binding domain
BB454ONE000489	1	PF00306.20	7e-26	90.6	ATP-synt_ab_C	ATP synthase alpha/beta chain, C terminal domain
BB454ONE000489	1	PF02874.16	2.5e-22	78.5	ATP-synt_ab_N	ATP synthase alpha/beta family, beta-barrel domain
BB454ONE000490	5	PF00646.26	2.4e-07	29.8	F-box	F-box domain
BB454ONE000491	4	PF00646.26	1.2e-07	30.8	F-box	F-box domain
BB454ONE000492	4	PF00520.24	2.3e-19	69.1	Ion_trans	Ion transport protein
BB454ONE000493	5	PF00520.24	1.9e-19	69.4	Ion_trans	Ion transport protein
BB454ONE000495	2	PF04636.6	9.1e-09	34.2	PA26	PA26 p53-induced protein (sestrin)
BB454ONE000496	2	PF01916.10	6.8e-48	163	DS	Deoxyhypusine synthase
BB454ONE000497	2	PF01916.10	1.1e-23	83.5	DS	Deoxyhypusine synthase
BB454ONE000497	3	PF01916.10	3.1e-12	45.9	DS	Deoxyhypusine synthase
BB454ONE000498	4	PF00572.11	2.9e-23	82	Ribosomal_L13	Ribosomal protein L13
BB454ONE000500	1	PF07716.8	9.9e-06	24.9	bZIP_2	Basic region leucine zipper
BB454ONE000501	4	PF00261.13	2.1e-86	288.5	Tropomyosin	Tropomyosin
BB454ONE000502	4	PF01553.14	3.8e-28	97.3	Acyltransferase	Acyltransferase
BB454ONE000503	4	PF01553.14	2.8e-09	36.2	Acyltransferase	Acyltransferase
BB454ONE000504	3	PF07019.5	3.7e-23	81.1	Rab5ip	Rab5-interacting protein (Rab5ip)
BB454ONE000505	2	PF07019.5	4.4e-23	80.9	Rab5ip	Rab5-interacting protein (Rab5ip)
BB454ONE000516	6	PF04707.7	2.1e-44	150.5	PRELI	PRELI-like family
BB454ONE000522	5	PF00071.15	3.7e-39	133.4	Ras	Ras family
BB454ONE000522	5	PF00025.14	2.1e-14	52.8	Arf	ADP-ribosylation factor family
BB454ONE000522	5	PF08477.6	4.5e-14	52.6	Miro	Miro-like protein
BB454ONE000522	5	PF04670.5	3.2e-08	32.6	Gtr1_RagA	Gtr1/RagA G protein conserved region
BB454ONE000524	1	PF03769.8	9.8e-07	28.6	Attacin_C	Attacin, C-terminal region
BB454ONE000525	1	PF03769.8	5.9e-07	29.3	Attacin_C	Attacin, C-terminal region
BB454ONE000526	4	PF01158.11	5.7e-44	147.7	Ribosomal_L36e	Ribosomal protein L36e
BB454ONE000527	2	PF01097.11	3e-14	52.1	Defensin_2	Arthropod defensin
BB454ONE000528	2	PF01097.11	3.6e-13	48.6	Defensin_2	Arthropod defensin
BB454ONE000534	4	PF00412.15	1.4e-19	69.6	LIM	LIM domain
BB454ONE000534	5	PF00412.15	7.1e-09	35.2	LIM	LIM domain
BB454ONE000535	4	PF00412.15	7.7e-20	70.4	LIM	LIM domain
BB454ONE000541	3	PF00383.15	1.4e-17	62.8	dCMP_cyt_deam_1	Cytidine and deoxycytidylate deaminase zinc-binding region
BB454ONE000541	3	PF08211.4	2.7e-09	36.7	dCMP_cyt_deam_2	Cytidine and deoxycytidylate deaminase zinc-binding region
BB454ONE000542	3	PF00383.15	2e-11	43.1	dCMP_cyt_deam_1	Cytidine and deoxycytidylate deaminase zinc-binding region
BB454ONE000543	2	PF03227.9	2.7e-27	94.4	GILT	Gamma interferon inducible lysosomal thiol reductase (GILT)
BB454ONE000544	3	PF03227.9	2e-27	94.8	GILT	Gamma interferon inducible lysosomal thiol reductase (GILT)
BB454ONE000545	1	PF01762.14	1.1e-11	44.3	Galactosyl_T	Galactosyltransferase
BB454ONE000546	3	PF01762.14	6.8e-17	61.3	Galactosyl_T	Galactosyltransferase
BB454ONE000550	3	PF00069.18	2.4e-14	52.8	Pkinase	Protein kinase domain
BB454ONE000551	2	PF00651.24	7.1e-17	61.1	BTB	BTB/POZ domain
BB454ONE000551	2	PF07707.8	2.5e-06	26.9	BACK	BTB And C-terminal Kelch
BB454ONE000553	5	PF01607.17	6.9e-12	44.8	CBM_14	Chitin binding Peritrophin-A domain
BB454ONE000554	6	PF01607.17	7.5e-12	44.6	CBM_14	Chitin binding Peritrophin-A domain
BB454ONE000557	1	PF00333.13	4.5e-28	96.4	Ribosomal_S5	Ribosomal protein S5, N-terminal domain
BB454ONE000557	1	PF03719.8	3.6e-21	73.9	Ribosomal_S5_C	Ribosomal protein S5, C-terminal domain
BB454ONE000558	1	PF00333.13	4.3e-28	96.5	Ribosomal_S5	Ribosomal protein S5, N-terminal domain
BB454ONE000558	1	PF03719.8	3.4e-21	73.9	Ribosomal_S5_C	Ribosomal protein S5, C-terminal domain
BB454ONE000559	1	PF00333.13	4.4e-28	96.4	Ribosomal_S5	Ribosomal protein S5, N-terminal domain
BB454ONE000559	1	PF03719.8	3.5e-21	73.9	Ribosomal_S5_C	Ribosomal protein S5, C-terminal domain
BB454ONE000562	1	PF04193.7	1.3e-10	40.3	PQ-loop	PQ loop repeat
BB454ONE000562	6	PF00265.11	1.4e-17	63.4	TK	Thymidine kinase
BB454ONE000563	1	PF04193.7	4.3e-08	32.2	PQ-loop	PQ loop repeat
BB454ONE000563	5	PF00265.11	1e-17	63.9	TK	Thymidine kinase
BB454ONE000568	1	PF02937.8	2.9e-24	84.4	COX6C	Cytochrome c oxidase subunit VIc
BB454ONE000569	1	PF02937.8	2.7e-24	84.5	COX6C	Cytochrome c oxidase subunit VIc
BB454ONE000570	1	PF02937.8	1.1e-24	85.7	COX6C	Cytochrome c oxidase subunit VIc
BB454ONE000571	2	PF01248.19	7e-09	34.7	Ribosomal_L7Ae	Ribosomal protein L7Ae/L30e/S12e/Gadd45 family
BB454ONE000571	3	PF01248.19	3.7e-08	32.4	Ribosomal_L7Ae	Ribosomal protein L7Ae/L30e/S12e/Gadd45 family
BB454ONE000572	2	PF01248.19	8e-24	82.6	Ribosomal_L7Ae	Ribosomal protein L7Ae/L30e/S12e/Gadd45 family
BB454ONE000576	1	PF01607.17	4.1e-09	35.9	CBM_14	Chitin binding Peritrophin-A domain
BB454ONE000577	6	PF00412.15	1.9e-11	43.5	LIM	LIM domain
BB454ONE000578	3	PF00412.15	1.7e-11	43.6	LIM	LIM domain
BB454ONE000579	2	PF11976.1	1e-20	72.8	Rad60-SLD	Ubiquitin-2 like Rad60 SUMO-like
BB454ONE000579	2	PF00240.16	3.7e-08	32.2	ubiquitin	Ubiquitin family
BB454ONE000580	3	PF11976.1	1e-20	72.9	Rad60-SLD	Ubiquitin-2 like Rad60 SUMO-like
BB454ONE000580	3	PF00240.16	3.6e-08	32.2	ubiquitin	Ubiquitin family
BB454ONE000581	3	PF01249.11	2.9e-35	119.7	Ribosomal_S21e	Ribosomal protein S21e
BB454ONE000582	6	PF01249.11	2.4e-35	120	Ribosomal_S21e	Ribosomal protein S21e
BB454ONE000583	5	PF06585.4	1.8e-47	160.9	JHBP	Haemolymph juvenile hormone binding protein (JHBP)
BB454ONE000584	3	PF06585.4	1.8e-47	160.9	JHBP	Haemolymph juvenile hormone binding protein (JHBP)
BB454ONE000585	4	PF04418.5	1.3e-22	79.1	DUF543	Domain of unknown function (DUF543)
BB454ONE000586	5	PF00827.10	4.1e-89	296.8	Ribosomal_L15e	Ribosomal L15
BB454ONE000587	4	PF00827.10	1.7e-89	298.1	Ribosomal_L15e	Ribosomal L15
BB454ONE000590	4	PF04707.7	9.2e-50	167.9	PRELI	PRELI-like family
BB454ONE000591	6	PF04707.7	9e-50	167.9	PRELI	PRELI-like family
BB454ONE000592	6	PF01283.12	2.8e-51	172.2	Ribosomal_S26e	Ribosomal protein S26e
BB454ONE000596	4	PF03134.12	3.9e-34	115.9	TB2_DP1_HVA22	TB2/DP1, HVA22 family
BB454ONE000597	3	PF03134.12	3.5e-34	116.1	TB2_DP1_HVA22	TB2/DP1, HVA22 family
BB454ONE000603	2	PF01607.17	1.1e-12	47.4	CBM_14	Chitin binding Peritrophin-A domain
BB454ONE000604	3	PF01607.17	1.1e-12	47.4	CBM_14	Chitin binding Peritrophin-A domain
BB454ONE000608	3	PF00831.16	1.5e-19	69	Ribosomal_L29	Ribosomal L29 protein
BB454ONE000609	2	PF00831.16	1.5e-19	69.1	Ribosomal_L29	Ribosomal L29 protein
BB454ONE000611	1	PF00213.11	1.1e-42	145.4	OSCP	ATP synthase delta (OSCP) subunit
BB454ONE000612	2	PF00213.11	1e-42	145.6	OSCP	ATP synthase delta (OSCP) subunit
BB454ONE000613	2	PF01778.10	1.3e-29	102.6	Ribosomal_L28e	Ribosomal L28e protein family
BB454ONE000614	4	PF01778.10	1.2e-29	102.7	Ribosomal_L28e	Ribosomal L28e protein family
BB454ONE000615	4	PF01287.13	6.1e-27	93	eIF-5a	Eukaryotic elongation factor 5A hypusine, DNA-binding OB fold
BB454ONE000616	1	PF01287.13	5.7e-27	93.1	eIF-5a	Eukaryotic elongation factor 5A hypusine, DNA-binding OB fold
BB454ONE000617	2	PF00153.20	5e-21	73.9	Mito_carr	Mitochondrial carrier protein
BB454ONE000618	6	PF00153.20	4.9e-21	73.9	Mito_carr	Mitochondrial carrier protein
BB454ONE000623	2	PF01655.11	3.4e-50	168.3	Ribosomal_L32e	Ribosomal protein L32
BB454ONE000624	3	PF01655.11	3.4e-50	168.3	Ribosomal_L32e	Ribosomal protein L32
BB454ONE000625	1	PF03446.8	7.9e-53	178.3	NAD_binding_2	NAD binding domain of 6-phosphogluconate dehydrogenase
BB454ONE000625	1	PF03807.10	1.8e-06	27.9	F420_oxidored	NADP oxidoreductase coenzyme F420-dependent
BB454ONE000625	1	PF02826.12	1.6e-06	27.1	2-Hacid_dh_C	D-isomer specific 2-hydroxyacid dehydrogenase, NAD binding domain
BB454ONE000626	4	PF03446.8	7.5e-53	178.4	NAD_binding_2	NAD binding domain of 6-phosphogluconate dehydrogenase
BB454ONE000626	4	PF03807.10	1.8e-06	27.9	F420_oxidored	NADP oxidoreductase coenzyme F420-dependent
BB454ONE000626	4	PF02826.12	1.5e-06	27.1	2-Hacid_dh_C	D-isomer specific 2-hydroxyacid dehydrogenase, NAD binding domain
BB454ONE000627	1	PF00400.25	1.9e-11	43	WD40	WD domain, G-beta repeat
BB454ONE000628	3	PF00091.18	8.2e-70	234.6	Tubulin	Tubulin/FtsZ family, GTPase domain
BB454ONE000628	3	PF03953.10	6.8e-51	171.3	Tubulin_C	Tubulin C-terminal domain
BB454ONE000629	6	PF00091.18	6.6e-70	234.9	Tubulin	Tubulin/FtsZ family, GTPase domain
BB454ONE000629	6	PF03953.10	5.8e-51	171.5	Tubulin_C	Tubulin C-terminal domain
BB454ONE000630	5	PF01395.15	6.4e-09	35.1	PBP_GOBP	PBP/GOBP family
BB454ONE000631	6	PF00112.16	7.1e-80	267.7	Peptidase_C1	Papain family cysteine protease
BB454ONE000631	6	PF08246.5	3.1e-14	52.6	Inhibitor_I29	Cathepsin propeptide inhibitor domain (I29)
BB454ONE000632	3	PF00112.16	7e-80	267.7	Peptidase_C1	Papain family cysteine protease
BB454ONE000632	3	PF08246.5	3.1e-14	52.6	Inhibitor_I29	Cathepsin propeptide inhibitor domain (I29)
BB454ONE000633	5	PF00231.12	2.7e-72	243.2	ATP-synt	ATP synthase
BB454ONE000634	5	PF00231.12	2.6e-72	243.3	ATP-synt	ATP synthase
BB454ONE000635	1	PF00164.18	3e-41	139.3	Ribosomal_S12	Ribosomal protein S12
BB454ONE000636	4	PF00164.18	2.7e-39	133	Ribosomal_S12	Ribosomal protein S12
BB454ONE000637	5	PF01048.13	1.9e-47	160.9	PNP_UDP_1	Phosphorylase superfamily
BB454ONE000638	6	PF01048.13	1.8e-47	160.9	PNP_UDP_1	Phosphorylase superfamily
BB454ONE000639	2	PF00071.15	2.4e-63	212	Ras	Ras family
BB454ONE000639	2	PF08477.6	1.2e-20	73.8	Miro	Miro-like protein
BB454ONE000639	2	PF00025.14	1.3e-15	56.8	Arf	ADP-ribosylation factor family
BB454ONE000639	2	PF04670.5	2.1e-06	26.7	Gtr1_RagA	Gtr1/RagA G protein conserved region
BB454ONE000639	2	PF00009.20	6.9e-06	25.3	GTP_EFTU	Elongation factor Tu GTP binding domain
BB454ONE000640	1	PF00071.15	2.4e-63	212	Ras	Ras family
BB454ONE000640	1	PF08477.6	1.2e-20	73.8	Miro	Miro-like protein
BB454ONE000640	1	PF00025.14	1.3e-15	56.8	Arf	ADP-ribosylation factor family
BB454ONE000640	1	PF04670.5	2.1e-06	26.7	Gtr1_RagA	Gtr1/RagA G protein conserved region
BB454ONE000640	1	PF00009.20	6.8e-06	25.3	GTP_EFTU	Elongation factor Tu GTP binding domain
BB454ONE000641	2	PF00736.12	1.2e-34	117.5	EF1_GNE	EF-1 guanine nucleotide exchange domain
BB454ONE000641	2	PF10587.2	4.8e-14	51.8	EF-1_beta_acid	Eukaryotic elongation factor 1 beta central acidic region
BB454ONE000642	6	PF00736.12	1.1e-34	117.6	EF1_GNE	EF-1 guanine nucleotide exchange domain
BB454ONE000642	6	PF10587.2	4.7e-14	51.9	EF-1_beta_acid	Eukaryotic elongation factor 1 beta central acidic region
BB454ONE000643	6	PF00036.25	7e-08	30.9	efhand	EF hand
BB454ONE000644	6	PF00036.25	6.9e-08	30.9	efhand	EF hand
BB454ONE000645	2	PF00012.13	4.2e-276	916.3	HSP70	Hsp70 protein
BB454ONE000645	2	PF06723.6	3e-15	55.3	MreB_Mbl	MreB/Mbl protein
BB454ONE000645	5	PF10712.2	3.8e-140	467.6	NAD-GH	NAD-specific glutamate dehydrogenase
BB454ONE000646	2	PF00012.13	4.1e-276	916.4	HSP70	Hsp70 protein
BB454ONE000646	2	PF06723.6	2.9e-15	55.3	MreB_Mbl	MreB/Mbl protein
BB454ONE000646	5	PF10712.2	3.7e-140	467.7	NAD-GH	NAD-specific glutamate dehydrogenase
BB454ONE000647	6	PF09791.2	2e-12	46	Oxidored-like	Oxidoreductase-like protein, N-terminal
BB454ONE000648	5	PF00412.15	1.3e-13	50.4	LIM	LIM domain
BB454ONE000649	4	PF00412.15	1.3e-13	50.4	LIM	LIM domain
BB454ONE000650	4	PF00011.14	3.3e-23	81.1	HSP20	Hsp20/alpha crystallin family
BB454ONE000651	3	PF00011.14	3.3e-23	81.1	HSP20	Hsp20/alpha crystallin family
BB454ONE000652	5	PF05511.4	2e-34	117.1	ATP-synt_F6	Mitochondrial ATP synthase coupling factor 6
BB454ONE000653	2	PF05511.4	1.7e-34	117.3	ATP-synt_F6	Mitochondrial ATP synthase coupling factor 6
BB454ONE000656	5	PF02784.9	9.6e-64	214.6	Orn_Arg_deC_N	Pyridoxal-dependent decarboxylase, pyridoxal binding domain
BB454ONE000656	5	PF00278.15	1.1e-31	108.6	Orn_DAP_Arg_deC	Pyridoxal-dependent decarboxylase, C-terminal sheet domain
BB454ONE000657	5	PF02784.9	8.4e-64	214.8	Orn_Arg_deC_N	Pyridoxal-dependent decarboxylase, pyridoxal binding domain
BB454ONE000657	5	PF00278.15	9.6e-32	108.8	Orn_DAP_Arg_deC	Pyridoxal-dependent decarboxylase, C-terminal sheet domain
BB454ONE000660	6	PF02403.15	4.6e-17	61.6	Seryl_tRNA_N	Seryl-tRNA synthetase N-terminal domain
BB454ONE000661	3	PF02403.15	4.3e-17	61.7	Seryl_tRNA_N	Seryl-tRNA synthetase N-terminal domain
BB454ONE000663	4	PF00255.12	1.6e-27	94.6	GSHPx	Glutathione peroxidase
BB454ONE000664	4	PF10526.2	4.9e-30	102.5	NADH_ub_rd_NUML	NADH-ubiquinone reductase complex 1 MLRQ subunit
BB454ONE000665	2	PF10526.2	4.5e-30	102.6	NADH_ub_rd_NUML	NADH-ubiquinone reductase complex 1 MLRQ subunit
BB454ONE000668	1	PF00410.12	7.8e-25	86.8	Ribosomal_S8	Ribosomal protein S8
BB454ONE000669	5	PF00410.12	7.4e-25	86.9	Ribosomal_S8	Ribosomal protein S8
BB454ONE000670	5	PF02221.8	1.5e-17	63.7	E1_DerP2_DerF2	ML domain
BB454ONE000671	5	PF02221.8	1.1e-17	64.1	E1_DerP2_DerF2	ML domain
BB454ONE000678	2	PF02284.9	1e-45	153.8	COX5A	Cytochrome c oxidase subunit Va
BB454ONE000679	2	PF02284.9	1e-45	153.8	COX5A	Cytochrome c oxidase subunit Va
BB454ONE000680	5	PF08079.5	5.6e-27	93.2	Ribosomal_L30_N	Ribosomal L30 N-terminal domain
BB454ONE000680	5	PF00327.13	1.2e-19	69.3	Ribosomal_L30	Ribosomal protein L30p/L7e
BB454ONE000681	6	PF05493.6	1.6e-22	79	ATP_synt_H	ATP synthase subunit H
BB454ONE000682	3	PF05493.6	6.7e-23	80.2	ATP_synt_H	ATP synthase subunit H
BB454ONE000685	2	PF06331.5	1.5e-25	88.5	Tbf5	Transcription factor TFIIH complex subunit Tfb5
BB454ONE000686	3	PF06331.5	1.4e-25	88.6	Tbf5	Transcription factor TFIIH complex subunit Tfb5
BB454ONE000688	5	PF00466.13	3.5e-22	77.9	Ribosomal_L10	Ribosomal protein L10
BB454ONE000688	5	PF00428.12	8.4e-17	61	Ribosomal_60s	60s Acidic ribosomal protein
BB454ONE000689	1	PF00466.13	3.4e-22	77.9	Ribosomal_L10	Ribosomal protein L10
BB454ONE000689	1	PF00428.12	8.2e-17	61	Ribosomal_60s	60s Acidic ribosomal protein
BB454ONE000690	4	PF01777.11	1.5e-33	114.4	Ribosomal_L27e	Ribosomal L27e protein family
BB454ONE000691	2	PF01777.11	1.3e-33	114.6	Ribosomal_L27e	Ribosomal L27e protein family
BB454ONE000692	2	PF00160.14	3.2e-49	166.7	Pro_isomerase	Cyclophilin type peptidyl-prolyl cis-trans isomerase/CLD
BB454ONE000692	4	PF01571.14	3.3e-22	78.5	GCV_T	Aminomethyltransferase folate-binding domain
BB454ONE000692	5	PF08669.4	5.8e-08	32.3	GCV_T_C	Glycine cleavage T-protein C-terminal barrel domain
BB454ONE000693	6	PF00160.14	1.1e-49	168.3	Pro_isomerase	Cyclophilin type peptidyl-prolyl cis-trans isomerase/CLD
BB454ONE000694	3	PF00137.14	1.6e-15	56.4	ATP-synt_C	ATP synthase subunit C
BB454ONE000695	6	PF00137.14	1.6e-15	56.4	ATP-synt_C	ATP synthase subunit C
BB454ONE000696	4	PF00226.24	1.3e-26	91.7	DnaJ	DnaJ domain
BB454ONE000696	4	PF01556.11	1.1e-22	79.5	DnaJ_C	DnaJ C terminal region
BB454ONE000696	4	PF00684.12	2.7e-14	52.4	DnaJ_CXXCXGXG	DnaJ central domain (4 repeats)
BB454ONE000697	1	PF00900.13	1.9e-32	110.4	Ribosomal_S4e	Ribosomal family S4e
BB454ONE000697	1	PF08071.5	1.7e-21	75.4	RS4NT	RS4NT (NUC023) domain
BB454ONE000697	1	PF01479.18	1.5e-09	36.7	S4	S4 domain
BB454ONE000697	1	PF00467.22	5.8e-06	25.3	KOW	KOW motif
BB454ONE000698	3	PF00900.13	1.8e-32	110.5	Ribosomal_S4e	Ribosomal family S4e
BB454ONE000698	3	PF08071.5	1.6e-21	75.5	RS4NT	RS4NT (NUC023) domain
BB454ONE000698	3	PF01479.18	1.4e-09	36.8	S4	S4 domain
BB454ONE000698	3	PF00467.22	5.5e-06	25.4	KOW	KOW motif
BB454ONE000699	5	PF00135.21	5.5e-81	272.5	COesterase	Carboxylesterase
BB454ONE000700	2	PF00135.21	5.4e-81	272.6	COesterase	Carboxylesterase
BB454ONE000701	1	PF02939.9	3.4e-23	80.9	UcrQ	UcrQ family
BB454ONE000702	6	PF02939.9	3.1e-23	81	UcrQ	UcrQ family
BB454ONE000703	3	PF00189.13	7.6e-16	57.8	Ribosomal_S3_C	Ribosomal protein S3, C-terminal domain
BB454ONE000704	2	PF00189.13	7.4e-16	57.8	Ribosomal_S3_C	Ribosomal protein S3, C-terminal domain
BB454ONE000709	2	PF02466.12	2.9e-39	133.5	Tim17	Tim17/Tim22/Tim23 family
BB454ONE000710	4	PF02466.12	2.1e-39	134	Tim17	Tim17/Tim22/Tim23 family
BB454ONE000711	3	PF01246.13	4e-31	106.3	Ribosomal_L24e	Ribosomal protein L24e
BB454ONE000712	5	PF01246.13	3.9e-31	106.4	Ribosomal_L24e	Ribosomal protein L24e
BB454ONE000713	5	PF00318.13	4e-22	78.1	Ribosomal_S2	Ribosomal protein S2
BB454ONE000714	2	PF00318.13	3.9e-22	78.2	Ribosomal_S2	Ribosomal protein S2
BB454ONE000715	4	PF00903.18	1.3e-13	50.6	Glyoxalase	Glyoxalase/Bleomycin resistance protein/Dioxygenase superfamily
BB454ONE000716	2	PF00903.18	1.3e-13	50.6	Glyoxalase	Glyoxalase/Bleomycin resistance protein/Dioxygenase superfamily
BB454ONE000717	6	PF00647.12	5.7e-42	141.4	EF1G	Elongation factor 1 gamma, conserved domain
BB454ONE000717	6	PF02798.13	5.5e-14	51.8	GST_N	Glutathione S-transferase, N-terminal domain
BB454ONE000717	6	PF00043.18	2.5e-13	49.5	GST_C	Glutathione S-transferase, C-terminal domain
BB454ONE000718	4	PF00647.12	5.7e-42	141.4	EF1G	Elongation factor 1 gamma, conserved domain
BB454ONE000718	4	PF02798.13	5.4e-14	51.8	GST_N	Glutathione S-transferase, N-terminal domain
BB454ONE000718	4	PF00043.18	2.5e-13	49.5	GST_C	Glutathione S-transferase, C-terminal domain
BB454ONE000719	5	PF00704.21	8.9e-66	222.3	Glyco_hydro_18	Glycosyl hydrolases family 18
BB454ONE000720	2	PF00704.21	8.9e-66	222.3	Glyco_hydro_18	Glycosyl hydrolases family 18
BB454ONE000725	5	PF01294.11	5.3e-70	234.2	Ribosomal_L13e	Ribosomal protein L13e
BB454ONE000726	5	PF01294.11	5e-70	234.2	Ribosomal_L13e	Ribosomal protein L13e
BB454ONE000729	2	PF00307.24	2.3e-10	40.1	CH	Calponin homology (CH) domain
BB454ONE000729	2	PF00402.11	1.5e-06	27	Calponin	Calponin family repeat
BB454ONE000730	4	PF05221.10	1.1e-141	470.1	AdoHcyase	S-adenosyl-L-homocysteine hydrolase
BB454ONE000730	4	PF00670.14	3.1e-87	290.1	AdoHcyase_NAD	S-adenosyl-L-homocysteine hydrolase, NAD binding domain
BB454ONE000730	4	PF02826.12	3.7e-07	29.1	2-Hacid_dh_C	D-isomer specific 2-hydroxyacid dehydrogenase, NAD binding domain
BB454ONE000731	5	PF05221.10	1.1e-141	470.1	AdoHcyase	S-adenosyl-L-homocysteine hydrolase
BB454ONE000731	5	PF00670.14	3.1e-87	290.1	AdoHcyase_NAD	S-adenosyl-L-homocysteine hydrolase, NAD binding domain
BB454ONE000731	5	PF02826.12	3.7e-07	29.1	2-Hacid_dh_C	D-isomer specific 2-hydroxyacid dehydrogenase, NAD binding domain
BB454ONE000734	6	PF02271.9	4.6e-35	119.2	UCR_14kD	Ubiquinol-cytochrome C reductase complex 14kD subunit
BB454ONE000735	3	PF02271.9	4.5e-35	119.2	UCR_14kD	Ubiquinol-cytochrome C reductase complex 14kD subunit
BB454ONE000736	1	PF03973.6	6.3e-09	35.3	Triabin	Triabin
BB454ONE000737	2	PF03973.6	6.1e-09	35.3	Triabin	Triabin
BB454ONE000738	3	PF06916.6	2.3e-23	81.9	DUF1279	Protein of unknown function (DUF1279)
BB454ONE000739	3	PF05365.5	4e-23	80.4	UCR_UQCRX_QCR9	Ubiquinol-cytochrome C reductase, UQCRX/QCR9 like
BB454ONE000740	5	PF05365.5	4e-23	80.4	UCR_UQCRX_QCR9	Ubiquinol-cytochrome C reductase, UQCRX/QCR9 like
BB454ONE000741	4	PF02935.9	3.2e-17	61.7	COX7C	Cytochrome c oxidase subunit VIIc
BB454ONE000742	6	PF02935.9	2.5e-17	62.1	COX7C	Cytochrome c oxidase subunit VIIc
BB454ONE000744	6	PF06936.4	1.3e-13	50.5	Selenoprotein_S	Selenoprotein S (SelS)
BB454ONE000745	1	PF06936.4	1.3e-13	50.5	Selenoprotein_S	Selenoprotein S (SelS)
BB454ONE000746	2	PF03501.8	6.7e-44	147.3	S10_plectin	Plectin/S10 domain
BB454ONE000747	4	PF03501.8	6.4e-44	147.4	S10_plectin	Plectin/S10 domain
BB454ONE000751	5	PF00125.17	6.7e-32	109.1	Histone	Core histone H2A/H2B/H3/H4
BB454ONE000752	5	PF00351.14	1.1e-182	605.8	Biopterin_H	Biopterin-dependent aromatic amino acid hydroxylase
BB454ONE000753	3	PF00351.14	1.1e-182	605.8	Biopterin_H	Biopterin-dependent aromatic amino acid hydroxylase
BB454ONE000754	4	PF00465.12	6.3e-104	347.1	Fe-ADH	Iron-containing alcohol dehydrogenase
BB454ONE000755	6	PF05497.5	2.2e-34	117.7	Destabilase	Destabilase
BB454ONE000758	3	PF03947.11	5.1e-40	135.9	Ribosomal_L2_C	Ribosomal Proteins L2, C-terminal domain
BB454ONE000758	3	PF00181.16	4.3e-18	64.7	Ribosomal_L2	Ribosomal Proteins L2, RNA binding domain
BB454ONE000759	2	PF03947.11	5e-40	136	Ribosomal_L2_C	Ribosomal Proteins L2, C-terminal domain
BB454ONE000759	2	PF00181.16	4.2e-18	64.7	Ribosomal_L2	Ribosomal Proteins L2, RNA binding domain
BB454ONE000760	3	PF08997.3	4.9e-21	73.8	UCR_6-4kD	Ubiquinol-cytochrome C reductase complex, 6.4kD protein
BB454ONE000761	2	PF08997.3	4.4e-21	74	UCR_6-4kD	Ubiquinol-cytochrome C reductase complex, 6.4kD protein
BB454ONE000762	6	PF01398.14	1.3e-11	44	Mov34	Mov34/MPN/PAD-1 family
BB454ONE000763	3	PF01398.14	1.1e-11	44.1	Mov34	Mov34/MPN/PAD-1 family
BB454ONE000764	4	PF00673.14	5.2e-23	80.2	Ribosomal_L5_C	ribosomal L5P family C-terminus
BB454ONE000764	4	PF00281.12	4e-20	71	Ribosomal_L5	Ribosomal protein L5
BB454ONE000765	3	PF00673.14	5e-23	80.3	Ribosomal_L5_C	ribosomal L5P family C-terminus
BB454ONE000765	3	PF00281.12	3.9e-20	71	Ribosomal_L5	Ribosomal protein L5
BB454ONE000768	1	PF00210.17	2.6e-42	143.6	Ferritin	Ferritin-like domain
BB454ONE000769	5	PF00210.17	2.5e-42	143.6	Ferritin	Ferritin-like domain
BB454ONE000770	2	PF01246.13	2.1e-29	100.8	Ribosomal_L24e	Ribosomal protein L24e
BB454ONE000771	1	PF01246.13	1.9e-29	101	Ribosomal_L24e	Ribosomal protein L24e
BB454ONE000772	5	PF01092.12	1.4e-64	215.1	Ribosomal_S6e	Ribosomal protein S6e
BB454ONE000773	5	PF01092.12	1.4e-64	215.1	Ribosomal_S6e	Ribosomal protein S6e
BB454ONE000776	5	PF01607.17	6.5e-14	51.2	CBM_14	Chitin binding Peritrophin-A domain
BB454ONE000777	2	PF01607.17	5.8e-14	51.4	CBM_14	Chitin binding Peritrophin-A domain
BB454ONE000781	4	PF01907.12	2.5e-26	90.9	Ribosomal_L37e	Ribosomal protein L37e
BB454ONE000782	4	PF01907.12	2.4e-26	90.9	Ribosomal_L37e	Ribosomal protein L37e
BB454ONE000785	2	PF00006.18	2e-73	246.1	ATP-synt_ab	ATP synthase alpha/beta family, nucleotide-binding domain
BB454ONE000785	2	PF00306.20	8.9e-26	90.2	ATP-synt_ab_C	ATP synthase alpha/beta chain, C terminal domain
BB454ONE000785	2	PF02874.16	9e-20	70.3	ATP-synt_ab_N	ATP synthase alpha/beta family, beta-barrel domain
BB454ONE000786	1	PF00061.16	4.8e-06	26.3	Lipocalin	Lipocalin / cytosolic fatty-acid binding protein family
BB454ONE000787	3	PF00061.16	4.7e-06	26.3	Lipocalin	Lipocalin / cytosolic fatty-acid binding protein family
BB454ONE000788	1	PF03179.8	1.2e-35	121.6	V-ATPase_G	Vacuolar (H+)-ATPase G subunit
BB454ONE000789	1	PF03179.8	1.2e-35	121.7	V-ATPase_G	Vacuolar (H+)-ATPase G subunit
BB454ONE000790	1	PF01776.10	1.2e-50	169.9	Ribosomal_L22e	Ribosomal L22e protein family
BB454ONE000791	6	PF01776.10	1.1e-50	169.9	Ribosomal_L22e	Ribosomal L22e protein family
BB454ONE000792	6	PF00334.12	3.3e-52	175.5	NDK	Nucleoside diphosphate kinase
BB454ONE000793	3	PF00334.12	3e-52	175.6	NDK	Nucleoside diphosphate kinase
BB454ONE000794	6	PF03392.6	3.5e-39	132.3	OS-D	Insect pheromone-binding family, A10/OS-D
BB454ONE000795	6	PF01159.12	3.6e-38	129.8	Ribosomal_L6e	Ribosomal protein L6e
BB454ONE000795	6	PF03868.8	1.9e-17	62.5	Ribosomal_L6e_N	Ribosomal protein L6, N-terminal domain
BB454ONE000796	3	PF01607.17	5.2e-07	29.1	CBM_14	Chitin binding Peritrophin-A domain
BB454ONE000797	3	PF01607.17	5.2e-07	29.1	CBM_14	Chitin binding Peritrophin-A domain
BB454ONE000798	1	PF00025.14	4e-76	253.8	Arf	ADP-ribosylation factor family
BB454ONE000798	1	PF00071.15	4.2e-12	45.4	Ras	Ras family
BB454ONE000798	1	PF09439.3	1.7e-11	43.3	SRPRB	Signal recognition particle receptor beta subunit
BB454ONE000798	1	PF04670.5	3.8e-10	39	Gtr1_RagA	Gtr1/RagA G protein conserved region
BB454ONE000798	1	PF00503.13	3e-08	32.8	G-alpha	G-protein alpha subunit
BB454ONE000798	1	PF08477.6	2e-07	31.2	Miro	Miro-like protein
BB454ONE000799	1	PF00025.14	3.9e-76	253.8	Arf	ADP-ribosylation factor family
BB454ONE000799	1	PF00071.15	4.1e-12	45.4	Ras	Ras family
BB454ONE000799	1	PF09439.3	1.7e-11	43.4	SRPRB	Signal recognition particle receptor beta subunit
BB454ONE000799	1	PF04670.5	3.7e-10	39	Gtr1_RagA	Gtr1/RagA G protein conserved region
BB454ONE000799	1	PF00503.13	2.9e-08	32.8	G-alpha	G-protein alpha subunit
BB454ONE000799	1	PF08477.6	1.9e-07	31.2	Miro	Miro-like protein
BB454ONE000802	1	PF00581.13	7.3e-17	61.4	Rhodanese	Rhodanese-like domain
BB454ONE000803	4	PF00581.13	3.6e-17	62.4	Rhodanese	Rhodanese-like domain
BB454ONE000804	1	PF06585.4	7e-55	185.2	JHBP	Haemolymph juvenile hormone binding protein (JHBP)
BB454ONE000805	1	PF06585.4	6.9e-55	185.2	JHBP	Haemolymph juvenile hormone binding protein (JHBP)
BB454ONE000806	5	PF00270.22	1.4e-49	167.4	DEAD	DEAD/DEAH box helicase
BB454ONE000806	5	PF00271.24	6.7e-27	92.8	Helicase_C	Helicase conserved C-terminal domain
BB454ONE000807	1	PF00270.22	1.4e-49	167.4	DEAD	DEAD/DEAH box helicase
BB454ONE000807	1	PF00271.24	6.7e-27	92.8	Helicase_C	Helicase conserved C-terminal domain
BB454ONE000808	2	PF01199.11	4.3e-37	125.8	Ribosomal_L34e	Ribosomal protein L34e
BB454ONE000809	3	PF01199.11	3.7e-37	126.1	Ribosomal_L34e	Ribosomal protein L34e
BB454ONE000811	6	PF00285.14	9e-80	267.7	Citrate_synt	Citrate synthase
BB454ONE000812	6	PF00285.14	3.3e-80	269.1	Citrate_synt	Citrate synthase
BB454ONE000813	6	PF06585.4	1.8e-60	203.5	JHBP	Haemolymph juvenile hormone binding protein (JHBP)
BB454ONE000814	6	PF06585.4	1.8e-60	203.5	JHBP	Haemolymph juvenile hormone binding protein (JHBP)
BB454ONE000815	2	PF01015.11	1.1e-77	259.5	Ribosomal_S3Ae	Ribosomal S3Ae family
BB454ONE000816	1	PF01015.11	9.5e-78	259.6	Ribosomal_S3Ae	Ribosomal S3Ae family
BB454ONE000817	4	PF00339.22	1.2e-30	105.9	Arrestin_N	Arrestin (or S-antigen), N-terminal domain
BB454ONE000817	4	PF02752.15	2.7e-20	72.6	Arrestin_C	Arrestin (or S-antigen), C-terminal domain
BB454ONE000818	4	PF00339.22	1.2e-30	105.9	Arrestin_N	Arrestin (or S-antigen), N-terminal domain
BB454ONE000818	4	PF02752.15	2.7e-20	72.6	Arrestin_C	Arrestin (or S-antigen), C-terminal domain
BB454ONE000822	3	PF00240.16	7.4e-35	117.7	ubiquitin	Ubiquitin family
BB454ONE000822	3	PF11976.1	5.4e-20	70.5	Rad60-SLD	Ubiquitin-2 like Rad60 SUMO-like
BB454ONE000824	3	PF02167.8	2.4e-79	265.7	Cytochrom_C1	Cytochrome C1 family
BB454ONE000825	2	PF02167.8	2.4e-79	265.7	Cytochrom_C1	Cytochrome C1 family
BB454ONE000826	2	PF01395.15	3.2e-15	55.5	PBP_GOBP	PBP/GOBP family
BB454ONE000827	4	PF01395.15	3.1e-15	55.5	PBP_GOBP	PBP/GOBP family
BB454ONE000836	6	PF00217.12	1.5e-106	354.9	ATP-gua_Ptrans	ATP:guanido phosphotransferase, C-terminal catalytic domain
BB454ONE000836	6	PF02807.8	2.9e-32	110.3	ATP-gua_PtransN	ATP:guanido phosphotransferase, N-terminal domain
BB454ONE000837	5	PF00217.12	1.4e-106	354.9	ATP-gua_Ptrans	ATP:guanido phosphotransferase, C-terminal catalytic domain
BB454ONE000837	5	PF02807.8	2.9e-32	110.3	ATP-gua_PtransN	ATP:guanido phosphotransferase, N-terminal domain
BB454ONE000838	3	PF00031.14	1.5e-06	27.9	Cystatin	Cystatin domain
BB454ONE000839	4	PF00031.14	1.3e-06	28.1	Cystatin	Cystatin domain
BB454ONE000840	1	PF02798.13	1.9e-16	59.6	GST_N	Glutathione S-transferase, N-terminal domain
BB454ONE000840	2	PF00043.18	6e-09	35.4	GST_C	Glutathione S-transferase, C-terminal domain
BB454ONE000842	6	PF06585.4	4.8e-65	218.5	JHBP	Haemolymph juvenile hormone binding protein (JHBP)
BB454ONE000843	5	PF06585.4	3.8e-65	218.8	JHBP	Haemolymph juvenile hormone binding protein (JHBP)
BB454ONE000844	4	PF01576.12	3.7e-220	732.6	Myosin_tail_1	Myosin tail
BB454ONE000846	3	PF00071.15	4.3e-08	32.3	Ras	Ras family
BB454ONE000847	1	PF03091.8	5.2e-38	128.5	CutA1	CutA1 divalent ion tolerance protein
BB454ONE000848	2	PF00787.17	1.4e-21	76	PX	PX domain
BB454ONE000850	5	PF00135.21	8.4e-59	199.3	COesterase	Carboxylesterase
BB454ONE000852	3	PF00515.21	4e-07	29	TPR_1	Tetratricopeptide repeat
BB454ONE000852	3	PF00226.24	1e-24	85.7	DnaJ	DnaJ domain
BB454ONE000853	4	PF05712.6	1.2e-09	37	MRG	MRG
BB454ONE000856	4	PF01667.10	2.8e-28	96.9	Ribosomal_S27e	Ribosomal protein S27
BB454ONE000857	6	PF10272.2	1.6e-30	105.7	Tmpp129	Putative transmembrane protein precursor
BB454ONE000858	1	PF05739.12	9.3e-17	60.1	SNARE	SNARE domain
BB454ONE000859	5	PF01423.15	1.5e-18	65.6	LSM	LSM domain
BB454ONE000862	2	PF09606.3	9.7e-54	182.5	Med15	ARC105 or Med15 subunit of Mediator complex non-fungal
BB454ONE000863	6	PF00100.16	4.4e-13	49	Zona_pellucida	Zona pellucida-like domain
BB454ONE000864	4	PF00067.15	1.4e-36	125.7	p450	Cytochrome P450
BB454ONE000864	6	PF00067.15	2.3e-52	177.7	p450	Cytochrome P450
BB454ONE000866	4	PF10255.2	2.5e-95	319.4	Paf67	RNA polymerase I-associated factor PAF67
BB454ONE000867	4	PF00474.10	6.3e-19	67.5	SSF	Sodium:solute symporter family
BB454ONE000867	5	PF00474.10	1.1e-09	37.2	SSF	Sodium:solute symporter family
BB454ONE000870	5	PF00364.15	1.7e-15	56	Biotin_lipoyl	Biotin-requiring enzyme
BB454ONE000871	2	PF01221.11	8.6e-44	147.1	Dynein_light	Dynein light chain type 1
BB454ONE000872	4	PF00067.15	1.9e-11	42.9	p450	Cytochrome P450
BB454ONE000872	5	PF00067.15	1.4e-07	30.1	p450	Cytochrome P450
BB454ONE000873	5	PF00076.15	9.1e-21	72.9	RRM_1	RNA recognition motif. (a.k.a. RRM, RBD, or RNP domain)
BB454ONE000877	6	PF01712.12	2.3e-18	66.1	dNK	Deoxynucleoside kinase
BB454ONE000878	2	PF00036.25	1.6e-06	26.6	efhand	EF hand
BB454ONE000880	5	PF03853.8	2e-17	62.9	YjeF_N	YjeF-related protein N-terminus
BB454ONE000880	6	PF03853.8	5.8e-16	58.2	YjeF_N	YjeF-related protein N-terminus
BB454ONE000881	1	PF00096.19	8.7e-08	31.8	zf-C2H2	Zinc finger, C2H2 type
BB454ONE000884	5	PF00026.16	1.3e-88	296.9	Asp	Eukaryotic aspartyl protease
BB454ONE000887	4	PF00076.15	5.2e-12	44.9	RRM_1	RNA recognition motif. (a.k.a. RRM, RBD, or RNP domain)
BB454ONE000890	2	PF03953.10	2.4e-44	150.1	Tubulin_C	Tubulin C-terminal domain
BB454ONE000893	1	PF01607.17	1.7e-12	46.7	CBM_14	Chitin binding Peritrophin-A domain
BB454ONE000893	3	PF01607.17	3.6e-12	45.7	CBM_14	Chitin binding Peritrophin-A domain
BB454ONE000894	3	PF03896.9	9.8e-58	195	TRAP_alpha	Translocon-associated protein (TRAP), alpha subunit
BB454ONE000895	6	PF10018.2	1.7e-27	95.7	Med4	Vitamin-D-receptor interacting Mediator subunit 17t
BB454ONE000899	3	PF00027.22	2.1e-22	78.3	cNMP_binding	Cyclic nucleotide-binding domain
BB454ONE000900	1	PF00297.15	9.3e-113	375.6	Ribosomal_L3	Ribosomal protein L3
BB454ONE000907	1	PF05839.4	1.4e-09	37.4	Apc13p	Apc13p protein
BB454ONE000909	4	PF00025.14	6.4e-44	148.9	Arf	ADP-ribosylation factor family
BB454ONE000909	4	PF00071.15	4.2e-06	25.9	Ras	Ras family
BB454ONE000911	1	PF00571.21	1.2e-07	31	CBS	CBS domain
BB454ONE000913	1	PF10044.2	5.3e-15	55.4	Ret_tiss	Retinal tissue protein
BB454ONE000913	2	PF10044.2	3.8e-09	36.6	Ret_tiss	Retinal tissue protein
BB454ONE000915	6	PF00366.13	3.4e-30	103.5	Ribosomal_S17	Ribosomal protein S17
BB454ONE000917	6	PF02544.9	1.3e-32	112.3	Steroid_dh	3-oxo-5-alpha-steroid 4-dehydrogenase
BB454ONE000918	4	PF07722.6	1.5e-17	63.5	Peptidase_C26	Peptidase C26
BB454ONE000919	4	PF00026.16	4.5e-33	114.5	Asp	Eukaryotic aspartyl protease
BB454ONE000920	3	PF06456.6	1.8e-08	33.7	Arfaptin	Arfaptin-like domain
BB454ONE000921	5	PF00255.12	1.8e-33	113.8	GSHPx	Glutathione peroxidase
BB454ONE000922	3	PF10251.2	1.3e-33	114.8	PEN-2	Presenilin enhancer-2 subunit of gamma secretase
BB454ONE000925	6	PF05705.7	5e-21	75.1	DUF829	Eukaryotic protein of unknown function (DUF829)
BB454ONE000929	3	PF05251.5	8.4e-39	131.4	UPF0197	Uncharacterised protein family (UPF0197)
BB454ONE000933	1	PF02777.11	1.4e-37	127.4	Sod_Fe_C	Iron/manganese superoxide dismutases, C-terminal domain
BB454ONE000933	1	PF00081.15	1e-29	102.2	Sod_Fe_N	Iron/manganese superoxide dismutases, alpha-hairpin domain
BB454ONE000938	1	PF09446.3	7.3e-17	60.7	VMA21	VMA21-like domain
BB454ONE000939	6	PF06747.6	2.2e-08	33.5	CHCH	CHCH domain
BB454ONE000943	4	PF02064.8	6.2e-10	38.6	MAS20	MAS20 protein import receptor
BB454ONE000945	5	PF05903.7	2.4e-20	72.6	DUF862	PPPDE putative peptidase domain
BB454ONE000947	5	PF00230.13	2.8e-42	144.4	MIP	Major intrinsic protein
BB454ONE000949	2	PF00036.25	2.1e-06	26.3	efhand	EF hand
BB454ONE000955	3	PF00153.20	2.1e-21	75.1	Mito_carr	Mitochondrial carrier protein
BB454ONE000957	5	PF03392.6	9.2e-38	127.8	OS-D	Insect pheromone-binding family, A10/OS-D
BB454ONE000959	5	PF00435.14	1e-13	51.1	Spectrin	Spectrin repeat
BB454ONE000959	5	PF08726.3	9.7e-26	89.2	efhand_Ca_insen	Ca2+ insensitive EF hand
BB454ONE000960	4	PF04135.5	1.3e-17	62.9	Nop10p	Nucleolar RNA-binding protein, Nop10p family
BB454ONE000961	4	PF00135.21	4.3e-28	98	COesterase	Carboxylesterase
BB454ONE000962	5	PF00091.18	4.8e-70	235.4	Tubulin	Tubulin/FtsZ family, GTPase domain
BB454ONE000962	5	PF03953.10	3e-51	172.4	Tubulin_C	Tubulin C-terminal domain
BB454ONE000963	3	PF06071.6	2.5e-39	132.6	YchF-GTPase_C	Protein of unknown function (DUF933)
BB454ONE000965	4	PF00240.16	4.2e-34	115.3	ubiquitin	Ubiquitin family
BB454ONE000965	4	PF01020.10	1.3e-30	104.3	Ribosomal_L40e	Ribosomal L40e family
BB454ONE000965	4	PF11976.1	2.1e-19	68.6	Rad60-SLD	Ubiquitin-2 like Rad60 SUMO-like
BB454ONE000969	5	PF05281.4	1.3e-06	27.6	Secretogranin_V	Neuroendocrine protein 7B2 precursor (Secretogranin V)
BB454ONE000971	2	PF05405.7	8.3e-44	148.6	Mt_ATP-synt_B	Mitochondrial ATP synthase B chain precursor (ATP-synt_B)
BB454ONE000972	2	PF00307.24	9.1e-17	60.7	CH	Calponin homology (CH) domain
BB454ONE000972	2	PF00402.11	2.7e-08	32.7	Calponin	Calponin family repeat
BB454ONE000973	5	PF03392.6	1.2e-22	79.3	OS-D	Insect pheromone-binding family, A10/OS-D
BB454ONE000974	2	PF00755.13	4.9e-06	24.6	Carn_acyltransf	Choline/Carnitine o-acyltransferase
BB454ONE000975	4	PF02535.15	2.3e-39	134.9	Zip	ZIP Zinc transporter
BB454ONE000978	4	PF00063.14	3.7e-92	309.2	Myosin_head	Myosin head (motor domain)
BB454ONE000978	4	PF02736.12	2.8e-15	55.4	Myosin_N	Myosin N-terminal SH3-like domain
BB454ONE000979	1	PF08737.3	3.8e-36	124.7	Rgp1	Rgp1
BB454ONE000981	2	PF02230.9	6e-25	87.6	Abhydrolase_2	Phospholipase/Carboxylesterase
BB454ONE000983	5	PF05283.4	4.4e-10	39.4	MGC-24	Multi-glycosylated core protein 24 (MGC-24)
BB454ONE000984	5	PF00515.21	3.8e-07	29.1	TPR_1	Tetratricopeptide repeat
BB454ONE000984	5	PF07719.10	1e-05	24.7	TPR_2	Tetratricopeptide repeat
BB454ONE000987	1	PF01398.14	5e-18	64.6	Mov34	Mov34/MPN/PAD-1 family
BB454ONE000988	1	PF01395.15	3.2e-11	42.5	PBP_GOBP	PBP/GOBP family
BB454ONE000989	4	PF01849.11	5e-23	80	NAC	NAC domain
BB454ONE000990	6	PF11538.1	5.8e-12	44.8	Snurportin1	Snurportin1
BB454ONE000993	3	PF02142.15	6.2e-28	96.2	MGS	MGS-like domain
BB454ONE000993	3	PF01808.11	3.7e-10	39	AICARFT_IMPCHas	AICARFT/IMPCHase bienzyme
BB454ONE000994	6	PF01588.13	1.1e-28	98.6	tRNA_bind	Putative tRNA binding domain
BB454ONE000995	2	PF05808.4	2e-06	27.1	Podoplanin	Podoplanin
BB454ONE000996	4	PF01490.11	7.3e-11	40.8	Aa_trans	Transmembrane amino acid transporter protein
BB454ONE000996	5	PF01490.11	1.2e-09	36.8	Aa_trans	Transmembrane amino acid transporter protein
BB454ONE000997	6	PF01490.11	8.5e-11	40.6	Aa_trans	Transmembrane amino acid transporter protein
BB454ONE000998	3	PF01702.11	1.8e-43	148.1	TGT	Queuine tRNA-ribosyltransferase
BB454ONE000999	2	PF07992.7	8.1e-29	100.2	Pyr_redox_2	Pyridine nucleotide-disulphide oxidoreductase
BB454ONE000999	2	PF00070.20	4.9e-18	64.9	Pyr_redox	Pyridine nucleotide-disulphide oxidoreductase
BB454ONE001000	3	PF00481.14	1.5e-31	109.4	PP2C	Protein phosphatase 2C
BB454ONE001001	1	PF03803.8	6e-21	74.2	Scramblase	Scramblase
BB454ONE001003	2	PF00638.11	1.1e-40	138.1	Ran_BP1	RanBP1 domain
BB454ONE001005	5	PF03079.7	2.1e-43	147.6	ARD	ARD/ARD' family
BB454ONE001005	5	PF07883.4	9.4e-09	34.3	Cupin_2	Cupin domain
BB454ONE001007	5	PF00210.17	9.5e-38	128.8	Ferritin	Ferritin-like domain
BB454ONE001011	2	PF04515.5	8e-12	44.2	Choline_transpo	Plasma-membrane choline transporter
BB454ONE001012	5	PF01566.11	9.2e-24	83.5	Nramp	Natural resistance-associated macrophage protein
BB454ONE001013	5	PF01522.14	6e-08	32	Polysacc_deac_1	Polysaccharide deacetylase
BB454ONE001018	4	PF01583.13	5.4e-25	87.5	APS_kinase	Adenylylsulphate kinase
BB454ONE001018	5	PF01747.10	8.5e-92	307	ATP-sulfurylase	ATP-sulfurylase
BB454ONE001018	5	PF01583.13	9.7e-24	83.4	APS_kinase	Adenylylsulphate kinase
BB454ONE001018	6	PF01583.13	4.3e-09	35.9	APS_kinase	Adenylylsulphate kinase
BB454ONE001021	5	PF03359.6	2e-11	43.8	GKAP	Guanylate-kinase-associated protein (GKAP) protein
BB454ONE001022	6	PF00328.15	8.7e-27	94	Acid_phosphat_A	Histidine acid phosphatase
BB454ONE001023	1	PF00821.11	2.1e-74	250.4	PEPCK	Phosphoenolpyruvate carboxykinase
BB454ONE001023	2	PF00821.11	2.3e-32	111.6	PEPCK	Phosphoenolpyruvate carboxykinase
BB454ONE001024	1	PF00441.17	6.1e-43	146.1	Acyl-CoA_dh_1	Acyl-CoA dehydrogenase, C-terminal domain
BB454ONE001024	1	PF08028.4	2.1e-13	50.3	Acyl-CoA_dh_2	Acyl-CoA dehydrogenase, C-terminal domain
BB454ONE001028	1	PF00171.15	2.7e-31	108.1	Aldedh	Aldehyde dehydrogenase family
BB454ONE001029	3	PF04758.7	1.3e-27	94.9	Ribosomal_S30	Ribosomal protein S30
BB454ONE001029	3	PF00240.16	6.5e-09	34.6	ubiquitin	Ubiquitin family
BB454ONE001030	1	PF07716.8	5.2e-12	45.1	bZIP_2	Basic region leucine zipper
BB454ONE001030	1	PF00170.14	2.1e-08	33.6	bZIP_1	bZIP transcription factor
BB454ONE001032	4	PF03357.14	2e-14	53	Snf7	Snf7
BB454ONE001033	2	PF00237.12	5.7e-38	128.7	Ribosomal_L22	Ribosomal protein L22p/L17e
BB454ONE001035	4	PF03188.9	4.9e-34	116.7	Cytochrom_B561	Eukaryotic cytochrome b561
BB454ONE001036	6	PF00370.14	3.7e-29	101.4	FGGY_N	FGGY family of carbohydrate kinases, N-terminal domain
BB454ONE001040	1	PF00012.13	1.1e-64	218.1	HSP70	Hsp70 protein
BB454ONE001040	4	PF10712.2	2.4e-08	32.5	NAD-GH	NAD-specific glutamate dehydrogenase
BB454ONE001042	1	PF00010.19	4.4e-11	42	HLH	Helix-loop-helix DNA-binding domain
BB454ONE001045	3	PF00175.14	5.2e-22	78.1	NAD_binding_1	Oxidoreductase NAD-binding domain
BB454ONE001046	1	PF03067.8	6.5e-20	71.8	Chitin_bind_3	Chitin binding domain
BB454ONE001050	3	PF00115.13	3.4e-31	108	COX1	Cytochrome C and Quinol oxidase polypeptide I
BB454ONE001052	1	PF00676.13	1.5e-37	128.6	E1_dh	Dehydrogenase E1 component
BB454ONE001052	3	PF00676.13	2e-47	161	E1_dh	Dehydrogenase E1 component
BB454ONE001054	3	PF00240.16	1.2e-26	91.5	ubiquitin	Ubiquitin family
BB454ONE001054	3	PF11976.1	1.8e-17	62.4	Rad60-SLD	Ubiquitin-2 like Rad60 SUMO-like
BB454ONE001056	1	PF01981.9	1.4e-43	146.9	PTH2	Peptidyl-tRNA hydrolase PTH2
BB454ONE001060	3	PF01248.19	2.4e-26	90.7	Ribosomal_L7Ae	Ribosomal protein L7Ae/L30e/S12e/Gadd45 family
BB454ONE001061	5	PF00067.15	1.7e-19	69.4	p450	Cytochrome P450
BB454ONE001062	5	PF09173.4	4.6e-29	100	eIF2_C	Initiation factor eIF2 gamma, C terminal
BB454ONE001062	6	PF03144.18	6e-12	45.2	GTP_EFTU_D2	Elongation factor Tu domain 2
BB454ONE001066	6	PF00380.12	1.9e-36	124.6	Ribosomal_S9	Ribosomal protein S9/S16
BB454ONE001067	3	PF00551.12	2.5e-56	189.7	Formyl_trans_N	Formyl transferase
BB454ONE001068	1	PF00004.22	1e-25	90.1	AAA	ATPase family associated with various cellular activities (AAA)
BB454ONE001069	2	PF11277.1	9.2e-16	56.2	Med24_N	Mediator complex subunit 24 N-terminal
BB454ONE001070	3	PF10937.1	1.5e-09	38.5	DUF2638	Protein of unknown function (DUF2638)
BB454ONE001071	4	PF01399.20	5e-10	39.3	PCI	PCI domain
BB454ONE001072	5	PF01434.11	2.4e-26	92.2	Peptidase_M41	Peptidase family M41
BB454ONE001073	1	PF05028.7	1.2e-48	165.7	PARG_cat	Poly (ADP-ribose) glycohydrolase (PARG)
BB454ONE001075	1	PF01546.21	4.1e-07	29.4	Peptidase_M20	Peptidase family M20/M25/M40
BB454ONE001077	1	PF04515.5	7.4e-63	211.9	Choline_transpo	Plasma-membrane choline transporter
BB454ONE001078	5	PF00240.16	2.2e-08	32.9	ubiquitin	Ubiquitin family
BB454ONE001079	1	PF04799.6	3.8e-59	198.6	Fzo_mitofusin	fzo-like conserved region
BB454ONE001080	6	PF06585.4	1.5e-34	118.6	JHBP	Haemolymph juvenile hormone binding protein (JHBP)
BB454ONE001082	2	PF12352.1	2.7e-21	75	V-SNARE_C	Snare region anchored in the vesicle membrane C-terminus
BB454ONE001083	4	PF00083.17	6.1e-24	84	Sugar_tr	Sugar (and other) transporter
BB454ONE001083	4	PF07690.9	3.6e-10	38.8	MFS_1	Major Facilitator Superfamily
BB454ONE001084	1	PF00118.17	3.7e-11	42	Cpn60_TCP1	TCP-1/cpn60 chaperonin family
BB454ONE001084	2	PF00118.17	3.7e-90	302.5	Cpn60_TCP1	TCP-1/cpn60 chaperonin family
BB454ONE001085	1	PF03015.12	2.4e-29	101.1	Sterile	Male sterility protein
BB454ONE001085	2	PF07993.5	2.5e-07	29.5	NAD_binding_4	Male sterility protein
BB454ONE001090	3	PF01061.17	1.2e-13	50.4	ABC2_membrane	ABC-2 type transporter
BB454ONE001092	5	PF00004.22	2.4e-09	37.1	AAA	ATPase family associated with various cellular activities (AAA)
BB454ONE001093	4	PF03153.6	4.9e-20	72.4	TFIIA	Transcription factor IIA, alpha/beta subunit
BB454ONE001094	1	PF00338.15	1.2e-30	104.9	Ribosomal_S10	Ribosomal protein S10p/S20e
BB454ONE001095	6	PF01607.17	2.7e-13	49.2	CBM_14	Chitin binding Peritrophin-A domain
BB454ONE001097	2	PF01015.11	2.7e-79	264.7	Ribosomal_S3Ae	Ribosomal S3Ae family
BB454ONE001099	6	PF00975.13	6.5e-26	91.6	Thioesterase	Thioesterase domain
BB454ONE001104	3	PF08069.5	9.3e-29	98.7	Ribosomal_S13_N	Ribosomal S13/S15 N-terminal domain
BB454ONE001104	3	PF00312.15	1.5e-22	78.8	Ribosomal_S15	Ribosomal protein S15
BB454ONE001106	2	PF00076.15	1.8e-14	52.7	RRM_1	RNA recognition motif. (a.k.a. RRM, RBD, or RNP domain)
BB454ONE001108	1	PF11819.1	1.2e-15	56.8	DUF3338	Domain of unknown function (DUF3338)
BB454ONE001111	4	PF01198.12	2.9e-41	138.8	Ribosomal_L31e	Ribosomal protein L31e
BB454ONE001113	5	PF03015.12	7.9e-10	38.5	Sterile	Male sterility protein
BB454ONE001113	6	PF03015.12	2.3e-08	33.8	Sterile	Male sterility protein
BB454ONE001114	4	PF01124.11	3e-25	87.8	MAPEG	MAPEG family
BB454ONE001117	5	PF04683.6	5.2e-81	271.9	Proteasom_Rpn13	Proteasome complex subunit Rpn13 ubiquitin receptor
BB454ONE001118	3	PF01237.11	5.6e-83	278	Oxysterol_BP	Oxysterol-binding protein
BB454ONE001120	1	PF01091.11	3.9e-10	39.2	PTN_MK_C	PTN/MK heparin-binding protein family, C-terminal domain
BB454ONE001120	3	PF01091.11	2.7e-06	26.9	PTN_MK_C	PTN/MK heparin-binding protein family, C-terminal domain
BB454ONE001121	3	PF00293.21	6.9e-10	38.3	NUDIX	NUDIX domain
BB454ONE001122	3	PF00385.17	9.6e-14	50.4	Chromo	'chromo' (CHRromatin Organisation MOdifier) domain
BB454ONE001125	3	PF00149.21	4.1e-13	48.8	Metallophos	Calcineurin-like phosphoesterase
BB454ONE001125	3	PF04152.7	3.2e-11	42.7	Mre11_DNA_bind	Mre11 DNA-binding presumed domain
BB454ONE001127	4	PF00112.16	2e-40	138.7	Peptidase_C1	Papain family cysteine protease
BB454ONE001130	6	PF00180.13	1.7e-09	36.7	Iso_dh	Isocitrate/isopropylmalate dehydrogenase
BB454ONE001132	5	PF00504.14	3e-23	82.4	Chloroa_b-bind	Chlorophyll A-B binding protein
BB454ONE001134	5	PF00069.18	8.1e-06	24.8	Pkinase	Protein kinase domain
BB454ONE001135	6	PF10229.2	1e-46	159	DUF2246	Uncharacterized conserved protein (DUF2246)
BB454ONE001139	5	PF00108.16	2.3e-95	318.2	Thiolase_N	Thiolase, N-terminal domain
BB454ONE001139	5	PF02803.11	9.5e-42	140.9	Thiolase_C	Thiolase, C-terminal domain
BB454ONE001140	3	PF00122.13	2.7e-62	209.4	E1-E2_ATPase	E1-E2 ATPase
BB454ONE001140	3	PF00689.14	4.7e-43	146.5	Cation_ATPase_C	Cation transporting ATPase, C-terminus
BB454ONE001140	3	PF00702.19	4.9e-19	68.8	Hydrolase	haloacid dehalogenase-like hydrolase
BB454ONE001142	3	PF00887.12	2.7e-30	103.5	ACBP	Acyl CoA binding protein
BB454ONE001144	1	PF03234.7	3.5e-29	102	CDC37_N	Cdc37 N terminal kinase binding
BB454ONE001147	6	PF01208.10	1.9e-41	141.8	URO-D	Uroporphyrinogen decarboxylase (URO-D)
BB454ONE001148	3	PF01398.14	1e-31	108.8	Mov34	Mov34/MPN/PAD-1 family
BB454ONE001152	4	PF11919.1	1e-13	50.5	DUF3437	Domain of unknown function (DUF3437)
BB454ONE001154	1	PF00468.10	6e-13	47.9	Ribosomal_L34	Ribosomal protein L34
BB454ONE001158	1	PF00036.25	7.3e-08	30.8	efhand	EF hand
BB454ONE001159	4	PF10203.2	4.4e-11	42.3	Pet191_N	Cytochrome c oxidase assembly protein PET191
BB454ONE001159	5	PF10203.2	2.4e-06	27.1	Pet191_N	Cytochrome c oxidase assembly protein PET191
BB454ONE001160	5	PF00067.15	5e-12	44.8	p450	Cytochrome P450
BB454ONE001164	3	PF02104.8	1.1e-21	77.3	SURF1	SURF1 family
BB454ONE001165	2	PF06881.4	2.2e-11	43.8	Elongin_A	RNA polymerase II transcription factor SIII (Elongin) subunit A
BB454ONE001168	4	PF12597.1	4.6e-15	55	DUF3767	Protein of unknown function (DUF3767)
BB454ONE001171	5	PF00067.15	2.2e-21	75.6	p450	Cytochrome P450
BB454ONE001172	3	PF01466.12	3e-39	132.6	Skp1	Skp1 family, dimerisation domain
BB454ONE001172	3	PF03931.8	1.1e-25	89.1	Skp1_POZ	Skp1 family, tetramerisation domain
BB454ONE001174	5	PF08547.5	9.1e-29	100	CIA30	Complex I intermediate-associated protein 30 (CIA30)
BB454ONE001181	1	PF03291.9	2.7e-21	75.4	Pox_MCEL	mRNA capping enzyme
BB454ONE001181	2	PF03291.9	4.4e-38	130.6	Pox_MCEL	mRNA capping enzyme
BB454ONE001182	3	PF08416.6	8e-35	119.2	PTB	Phosphotyrosine-binding domain
BB454ONE001183	5	PF09746.2	1.2e-120	402.6	Membralin	Tumour-associated protein
BB454ONE001184	4	PF10210.2	6.6e-21	74.1	MRP-S32	Mitochondrial 28S ribosomal protein S32
BB454ONE001187	6	PF02824.14	8.6e-22	76.4	TGS	TGS domain
BB454ONE001189	2	PF04981.6	1.3e-38	132	NMD3	NMD3 family
BB454ONE001189	3	PF04981.6	1.8e-27	95.6	NMD3	NMD3 family
BB454ONE001193	1	PF04588.6	4.6e-07	29.1	HIG_1_N	Hypoxia induced protein conserved region
BB454ONE001196	5	PF00201.11	1.7e-77	260.8	UDPGT	UDP-glucoronosyl and UDP-glucosyl transferase
BB454ONE001196	5	PF04101.9	4.1e-08	32.7	Glyco_tran_28_C	Glycosyltransferase family 28 C-terminal domain
BB454ONE001199	4	PF10589.2	1.9e-16	58.5	NADH_4Fe-4S	NADH-ubiquinone oxidoreductase-F iron-sulfur binding region
BB454ONE001203	2	PF00596.14	2.2e-13	49.9	Aldolase_II	Class II Aldolase and Adducin N-terminal domain
BB454ONE001205	1	PF01423.15	3.3e-15	54.9	LSM	LSM domain
BB454ONE001208	3	PF10712.2	1.9e-24	85.6	NAD-GH	NAD-specific glutamate dehydrogenase
BB454ONE001208	6	PF00012.13	1.6e-51	174.6	HSP70	Hsp70 protein
BB454ONE001209	3	PF00687.14	3e-08	32.9	Ribosomal_L1	Ribosomal protein L1p/L10e family
BB454ONE001210	5	PF11764.1	5.7e-06	26	N-SET	COMPASS (Complex proteins associated with Set1p) component N
BB454ONE001210	6	PF11764.1	6.7e-11	42	N-SET	COMPASS (Complex proteins associated with Set1p) component N
BB454ONE001217	5	PF07491.4	9.6e-22	76	PPI_Ypi1	Protein phosphatase inhibitor
BB454ONE001218	6	PF03345.7	1.8e-54	184.5	DDOST_48kD	Oligosaccharyltransferase 48 kDa subunit beta
BB454ONE001219	5	PF00119.13	2e-32	112.1	ATP-synt_A	ATP synthase A chain
BB454ONE001220	6	PF01395.15	1.1e-06	28	PBP_GOBP	PBP/GOBP family
BB454ONE001221	1	PF00168.23	1.4e-15	56.5	C2	C2 domain
BB454ONE001222	5	PF00708.11	2.1e-23	81.8	Acylphosphatase	Acylphosphatase
BB454ONE001226	1	PF00462.17	5.4e-19	67.6	Glutaredoxin	Glutaredoxin
BB454ONE001245	1	PF00071.15	1.6e-09	37	Ras	Ras family
BB454ONE001245	3	PF00071.15	4.5e-20	71.3	Ras	Ras family
BB454ONE001245	3	PF08477.6	3e-07	30.6	Miro	Miro-like protein
BB454ONE001247	5	PF08675.4	2.5e-18	65.5	RNA_bind	RNA binding domain
BB454ONE001249	3	PF00089.19	1.3e-48	165.2	Trypsin	Trypsin
BB454ONE001254	6	PF01951.9	2.9e-49	166.2	Archease	Archease protein family (DUF101/UPF0211)
BB454ONE001255	1	PF02020.11	1.4e-24	85.5	W2	eIF4-gamma/eIF5/eIF2-epsilon
BB454ONE001256	4	PF05064.6	2.6e-19	68.6	Nsp1_C	Nsp1-like C-terminal region
BB454ONE001258	4	PF10500.2	3.6e-28	98.2	SR-25	Nuclear RNA-splicing-associated protein
BB454ONE001259	3	PF00076.15	3.3e-09	35.9	RRM_1	RNA recognition motif. (a.k.a. RRM, RBD, or RNP domain)
BB454ONE001262	5	PF00584.13	1e-13	50.3	SecE	SecE/Sec61-gamma subunits of protein translocation complex
BB454ONE001267	4	PF05160.6	9.8e-21	73	DSS1_SEM1	DSS1/SEM1 family
BB454ONE001268	1	PF04430.7	9.2e-09	34.5	DUF498	Protein of unknown function (DUF498/DUF598)
BB454ONE001273	2	PF03725.8	2e-07	30.4	RNase_PH_C	3' exoribonuclease family, domain 2
BB454ONE001274	2	PF01280.13	8.5e-49	164.8	Ribosomal_L19e	Ribosomal protein L19e
BB454ONE001274	3	PF01280.13	9.9e-08	31.5	Ribosomal_L19e	Ribosomal protein L19e
BB454ONE001276	6	PF03208.12	6e-33	113	PRA1	PRA1 family protein
BB454ONE001278	1	PF00466.13	1.7e-18	66	Ribosomal_L10	Ribosomal protein L10
BB454ONE001280	3	PF05603.5	6.9e-51	172.2	DUF775	Protein of unknown function (DUF775)
BB454ONE001283	6	PF12510.1	1.3e-09	37.4	Smoothelin	Smoothelin cytoskeleton protein
BB454ONE001285	5	PF00155.14	9.6e-34	116.5	Aminotran_1_2	Aminotransferase class I and II
BB454ONE001293	6	PF02961.7	2.3e-46	155.6	BAF	Barrier to autointegration factor
BB454ONE001298	1	PF02109.9	2.4e-49	165.7	DAD	DAD family
BB454ONE001299	2	PF00106.18	1.1e-07	31.6	adh_short	short chain dehydrogenase
BB454ONE001300	1	PF00049.11	1e-07	32.3	Insulin	Insulin/IGF/Relaxin family
BB454ONE001301	5	PF12328.1	2.2e-09	36.8	Rpp20	Rpp20 subunit of nuclear RNase MRP and P
BB454ONE001301	5	PF01918.14	2.1e-07	30.1	Alba	Alba
BB454ONE001303	1	PF06239.4	2.6e-22	78.5	ECSIT	Evolutionarily conserved signalling intermediate in Toll pathway
BB454ONE001303	2	PF06239.4	1.6e-22	79.1	ECSIT	Evolutionarily conserved signalling intermediate in Toll pathway
BB454ONE001308	1	PF04889.5	1.3e-22	80.4	Cwf_Cwc_15	Cwf15/Cwc15 cell cycle control protein
BB454ONE001314	2	PF01230.16	1.7e-29	101.8	HIT	HIT domain
BB454ONE001314	2	PF11969.1	3.1e-26	91.5	DcpS_C	Scavenger mRNA decapping enzyme C-term binding
BB454ONE001317	4	PF11923.1	3.5e-10	39.1	DUF3441	Domain of unknown function (DUF3441)
BB454ONE001322	6	PF06747.6	2.7e-06	26.8	CHCH	CHCH domain
BB454ONE001323	4	PF00085.13	1.6e-07	30.5	Thioredoxin	Thioredoxin
BB454ONE001323	5	PF00085.13	4.3e-13	48.5	Thioredoxin	Thioredoxin
BB454ONE001327	4	PF06417.5	2.5e-33	113.7	DUF1077	Protein of unknown function (DUF1077)
BB454ONE001328	5	PF00113.15	1.3e-156	519.6	Enolase_C	Enolase, C-terminal TIM barrel domain
BB454ONE001328	5	PF03952.9	1.1e-55	186.7	Enolase_N	Enolase, N-terminal domain
BB454ONE001329	3	PF02466.12	1.3e-08	34.4	Tim17	Tim17/Tim22/Tim23 family
BB454ONE001330	3	PF00005.20	1.7e-09	37.7	ABC_tran	ABC transporter
BB454ONE001332	1	PF01779.10	1.5e-21	75.5	Ribosomal_L29e	Ribosomal L29e protein family
BB454ONE001333	2	PF01920.13	7.4e-20	70.3	Prefoldin_2	Prefoldin subunit
BB454ONE001335	2	PF00022.12	6.4e-30	103.5	Actin	Actin
BB454ONE001337	3	PF07690.9	3.4e-41	140.8	MFS_1	Major Facilitator Superfamily
BB454ONE001338	2	PF00832.13	6.8e-23	79.5	Ribosomal_L39	Ribosomal L39 protein
BB454ONE001339	4	PF01217.13	1.2e-30	105.7	Clat_adaptor_s	Clathrin adaptor complex small chain
BB454ONE001340	4	PF00019.13	9.3e-27	93	TGF_beta	Transforming growth factor beta like domain
BB454ONE001341	2	PF08445.3	3.7e-11	42.3	FR47	FR47-like protein
BB454ONE001342	3	PF04133.7	7.7e-40	135	Vps55	Vacuolar protein sorting 55
BB454ONE001345	5	PF01156.12	1.6e-60	204.7	IU_nuc_hydro	Inosine-uridine preferring nucleoside hydrolase
BB454ONE001353	4	PF00364.15	1.5e-17	62.6	Biotin_lipoyl	Biotin-requiring enzyme
BB454ONE001356	4	PF04068.8	2.1e-15	55.6	RLI	Possible metal-binding domain in RNase L inhibitor, RLI
BB454ONE001356	4	PF00037.20	9.7e-07	27.8	Fer4	4Fe-4S binding domain
BB454ONE001363	5	PF08312.5	2.2e-14	53	cwf21	cwf21
BB454ONE001365	6	PF03045.8	7.3e-28	96.1	DAN	DAN domain
BB454ONE001368	1	PF00036.25	3.9e-08	31.7	efhand	EF hand
BB454ONE001372	3	PF00565.10	2.4e-11	43.5	SNase	Staphylococcal nuclease homologue
BB454ONE001375	2	PF10075.2	2.5e-34	117.7	PCI_Csn8	COP9 signalosome, subunit CSN8
BB454ONE001381	3	PF00443.22	4e-07	29	UCH	Ubiquitin carboxyl-terminal hydrolase
BB454ONE001383	4	PF00505.12	1e-17	64	HMG_box	HMG (high mobility group) box
BB454ONE001386	4	PF00025.14	9.7e-78	259	Arf	ADP-ribosylation factor family
BB454ONE001386	4	PF09439.3	2e-13	49.6	SRPRB	Signal recognition particle receptor beta subunit
BB454ONE001386	4	PF00071.15	1.7e-11	43.4	Ras	Ras family
BB454ONE001386	4	PF04670.5	1.1e-09	37.4	Gtr1_RagA	Gtr1/RagA G protein conserved region
BB454ONE001386	4	PF00503.13	3.1e-07	29.4	G-alpha	G-protein alpha subunit
BB454ONE001386	4	PF08477.6	6e-07	29.6	Miro	Miro-like protein
BB454ONE001387	3	PF11717.1	5.5e-07	28.8	Tudor-knot	RNA binding activity-knot of a chromodomain
BB454ONE001388	1	PF01401.11	7.3e-76	255.3	Peptidase_M2	Angiotensin-converting enzyme
BB454ONE001388	2	PF01401.11	6.2e-92	308.4	Peptidase_M2	Angiotensin-converting enzyme
BB454ONE001388	3	PF01401.11	3.5e-07	28.5	Peptidase_M2	Angiotensin-converting enzyme
BB454ONE001389	3	PF00483.16	5.5e-14	51.7	NTP_transferase	Nucleotidyl transferase
BB454ONE001392	2	PF00227.19	3.8e-51	172.7	Proteasome	Proteasome subunit
BB454ONE001392	2	PF10584.2	2.1e-13	48.9	Proteasome_A_N	Proteasome subunit A N-terminal signature
BB454ONE001396	6	PF01929.10	4.5e-28	97.1	Ribosomal_L14e	Ribosomal protein L14
BB454ONE001397	3	PF00297.15	1.4e-11	43.9	Ribosomal_L3	Ribosomal protein L3
BB454ONE001399	3	PF05118.8	1.9e-34	118.4	Asp_Arg_Hydrox	Aspartyl/Asparaginyl beta-hydroxylase
BB454ONE001406	3	PF05022.5	4.1e-19	68.5	SRP40_C	SRP40, C-terminal domain
BB454ONE001408	4	PF06585.4	1e-08	34	JHBP	Haemolymph juvenile hormone binding protein (JHBP)
BB454ONE001412	2	PF01176.12	6.8e-27	92.3	eIF-1a	Translation initiation factor 1A / IF-1
BB454ONE001417	5	PF09066.3	3.1e-30	104	B2-adapt-app_C	Beta2-adaptin appendage, C-terminal sub-domain
BB454ONE001419	1	PF04739.8	8.2e-19	67	AMPKBI	5'-AMP-activated protein kinase beta subunit, interation domain
BB454ONE001420	1	PF01813.10	1.1e-62	210.8	ATP-synt_D	ATP synthase subunit D
BB454ONE001422	4	PF08523.3	2.7e-20	71.8	MBF1	Multiprotein bridging factor 1
BB454ONE001422	4	PF01381.15	4.3e-12	45.3	HTH_3	Helix-turn-helix
BB454ONE001423	1	PF00929.17	3.5e-19	69.3	Exonuc_X-T	Exonuclease
BB454ONE001424	3	PF00067.15	6.9e-17	60.8	p450	Cytochrome P450
BB454ONE001431	2	PF01920.13	7.6e-12	44.6	Prefoldin_2	Prefoldin subunit
BB454ONE001433	5	PF03669.6	6.5e-34	115.2	UPF0139	Uncharacterised protein family (UPF0139)
BB454ONE001433	6	PF03669.6	2.2e-08	33.1	UPF0139	Uncharacterised protein family (UPF0139)
BB454ONE001435	3	PF00076.15	8.9e-06	24.9	RRM_1	RNA recognition motif. (a.k.a. RRM, RBD, or RNP domain)
BB454ONE001445	3	PF00379.16	4.6e-12	45.7	Chitin_bind_4	Insect cuticle protein
BB454ONE001446	2	PF02146.10	2.4e-16	59.6	SIR2	Sir2 family
BB454ONE001448	4	PF00097.18	1.2e-06	28	zf-C3HC4	Zinc finger, C3HC4 type (RING finger)
BB454ONE001449	3	PF00057.11	2.8e-10	39.5	Ldl_recept_a	Low-density lipoprotein receptor domain class A
BB454ONE001454	4	PF07653.10	3.5e-10	38.9	SH3_2	Variant SH3 domain
BB454ONE001454	4	PF00018.21	2.8e-16	58.3	SH3_1	SH3 domain
BB454ONE001455	1	PF00118.17	1e-34	119.7	Cpn60_TCP1	TCP-1/cpn60 chaperonin family
BB454ONE001456	4	PF03344.8	9.9e-06	24	Daxx	Daxx Family
BB454ONE001458	5	PF02136.13	8.6e-18	64.5	NTF2	Nuclear transport factor 2 (NTF2) domain
BB454ONE001459	5	PF00650.13	2.5e-06	26.7	CRAL_TRIO	CRAL/TRIO domain
BB454ONE001466	6	PF03153.6	1.6e-38	133.2	TFIIA	Transcription factor IIA, alpha/beta subunit
BB454ONE001491	5	PF00102.20	8.9e-07	28.2	Y_phosphatase	Protein-tyrosine phosphatase
BB454ONE001496	4	PF05347.8	7.1e-07	28.8	Complex1_LYR	Complex 1 protein (LYR family)
BB454ONE001497	3	PF01200.11	8.5e-31	105.2	Ribosomal_S28e	Ribosomal protein S28e
BB454ONE001499	5	PF00203.14	4.5e-35	118.8	Ribosomal_S19	Ribosomal protein S19
BB454ONE001505	2	PF00153.20	3.6e-16	58.3	Mito_carr	Mitochondrial carrier protein
BB454ONE001514	1	PF02737.11	6.6e-21	74.4	3HCDH_N	3-hydroxyacyl-CoA dehydrogenase, NAD binding domain
BB454ONE001514	2	PF00725.15	9.2e-15	54.5	3HCDH	3-hydroxyacyl-CoA dehydrogenase, C-terminal domain
BB454ONE001518	2	PF01920.13	2.8e-17	62	Prefoldin_2	Prefoldin subunit
BB454ONE001521	6	PF01439.11	1.5e-24	85.9	Metallothio_2	Metallothionein
BB454ONE001527	3	PF00400.25	1.6e-11	43.2	WD40	WD domain, G-beta repeat
BB454ONE001529	2	PF02441.12	7.6e-21	73.7	Flavoprotein	Flavoprotein
BB454ONE001531	5	PF00091.18	4.4e-69	232.2	Tubulin	Tubulin/FtsZ family, GTPase domain
BB454ONE001531	5	PF03953.10	4.2e-51	172	Tubulin_C	Tubulin C-terminal domain
BB454ONE001532	2	PF01423.15	1.1e-12	46.8	LSM	LSM domain
BB454ONE001535	5	PF05773.15	1.4e-12	47.1	RWD	RWD domain
BB454ONE001536	3	PF05347.8	7.1e-11	41.6	Complex1_LYR	Complex 1 protein (LYR family)
BB454ONE001543	2	PF00808.16	5.6e-11	42	CBFD_NFYB_HMF	Histone-like transcription factor (CBF/NF-Y) and archaeal histone
BB454ONE001546	3	PF00013.22	4.7e-06	25.8	KH_1	KH domain
BB454ONE001547	1	PF12230.1	1.6e-20	73.2	PRP21_like_P	Pre-mRNA splicing factor PRP21 like protein
BB454ONE001550	4	PF01496.12	2.7e-48	164.1	V_ATPase_I	V-type ATPase 116kDa subunit family
BB454ONE001552	1	PF01510.18	1.5e-20	73.3	Amidase_2	N-acetylmuramoyl-L-alanine amidase
BB454ONE001553	6	PF00067.15	1.7e-28	99	p450	Cytochrome P450
BB454ONE001555	2	PF00031.14	8.7e-10	38.3	Cystatin	Cystatin domain
BB454ONE001557	4	PF00467.22	1.4e-07	30.5	KOW	KOW motif
BB454ONE001565	2	PF01409.13	4.9e-35	120.5	tRNA-synt_2d	tRNA synthetases class II core domain (F)
BB454ONE001567	5	PF05739.12	8.1e-13	47.5	SNARE	SNARE domain
BB454ONE001569	3	PF03259.10	6.1e-28	95.9	Robl_LC7	Roadblock/LC7 domain
BB454ONE001573	1	PF11698.1	8e-11	41.5	V-ATPase_H_C	V-ATPase subunit H
BB454ONE001574	2	PF08293.4	4.6e-21	74.2	MRP-S33	Mitochondrial ribosomal subunit S27
BB454ONE001578	5	PF00035.18	4e-10	39.7	dsrm	Double-stranded RNA binding motif
BB454ONE001579	2	PF00575.16	4.2e-08	32.8	S1	S1 RNA binding domain
BB454ONE001580	4	PF00004.22	7.3e-24	84.1	AAA	ATPase family associated with various cellular activities (AAA)
BB454ONE001581	1	PF10242.2	2.8e-16	59.7	L_HGMIC_fpl	Lipoma HMGIC fusion partner-like protein
BB454ONE001581	2	PF10242.2	4.5e-06	26.4	L_HGMIC_fpl	Lipoma HMGIC fusion partner-like protein
BB454ONE001582	2	PF05686.5	2.5e-34	118.3	DUF821	Arabidopsis thaliana protein of unknown function (DUF821)
BB454ONE001582	3	PF05686.5	2.7e-09	35.8	DUF821	Arabidopsis thaliana protein of unknown function (DUF821)
BB454ONE001587	3	PF00829.14	1e-13	50.9	Ribosomal_L21p	Ribosomal prokaryotic L21 protein
BB454ONE001590	3	PF09789.2	2.4e-10	39.8	DUF2353	Uncharacterized coiled-coil protein (DUF2353)
BB454ONE001592	1	PF07189.4	1.1e-37	127.3	SF3b10	Splicing factor 3B subunit 10 (SF3b10)
BB454ONE001594	2	PF00198.16	1e-31	109.6	2-oxoacid_dh	2-oxoacid dehydrogenases acyltransferase (catalytic domain)
BB454ONE001598	2	PF03647.6	2e-24	85.5	Tmemb_14	Transmembrane proteins 14C
BB454ONE001605	3	PF01920.13	6.8e-21	73.7	Prefoldin_2	Prefoldin subunit
BB454ONE001607	4	PF02233.9	1.5e-38	132.4	PNTB	NAD(P) transhydrogenase beta subunit
BB454ONE001609	5	PF02146.10	2.6e-20	72.5	SIR2	Sir2 family
BB454ONE001612	6	PF01016.12	8.2e-20	70	Ribosomal_L27	Ribosomal L27 protein
BB454ONE001613	4	PF07258.7	2.5e-10	39.8	HCaRG	HCaRG protein
BB454ONE001613	6	PF07258.7	5.3e-13	48.5	HCaRG	HCaRG protein
BB454ONE001614	1	PF00694.12	5.7e-24	84.3	Aconitase_C	Aconitase C-terminal domain
BB454ONE001617	1	PF01327.14	5.2e-24	84.1	Pep_deformylase	Polypeptide deformylase
BB454ONE001619	5	PF00338.15	1.2e-19	69.6	Ribosomal_S10	Ribosomal protein S10p/S20e
BB454ONE001622	5	PF09360.3	1.9e-13	49.7	zf-CDGSH	Iron-binding zinc finger CDGSH type
BB454ONE001625	2	PF02463.12	7e-31	106.8	SMC_N	RecF/RecN/SMC N terminal domain
BB454ONE001626	6	PF05071.9	4.4e-16	58.9	NDUFA12	NADH ubiquinone oxidoreductase subunit NDUFA12
BB454ONE001629	1	PF03900.8	8.3e-13	47.9	Porphobil_deamC	Porphobilinogen deaminase, C-terminal domain
BB454ONE001629	3	PF01379.13	1.6e-33	115.1	Porphobil_deam	Porphobilinogen deaminase, dipyromethane cofactor binding domain
BB454ONE001631	1	PF02410.8	5.5e-25	87	DUF143	Domain of unknown function DUF143
BB454ONE001635	2	PF07847.5	9.6e-42	142.2	DUF1637	Protein of unknown function (DUF1637)
BB454ONE001642	1	PF09756.2	3e-47	160.1	DDRGK	DDRGK domain
BB454ONE001645	3	PF00191.13	2.6e-18	65.3	Annexin	Annexin
BB454ONE001648	3	PF03114.11	2.7e-28	98.7	BAR	BAR domain
BB454ONE001648	3	PF10455.2	3.8e-08	32.2	BAR_2	Bin/amphiphysin/Rvs domain for vesicular trafficking
BB454ONE001654	3	PF07690.9	7.6e-18	64	MFS_1	Major Facilitator Superfamily
BB454ONE001654	3	PF00083.17	8.7e-14	50.6	Sugar_tr	Sugar (and other) transporter
BB454ONE001657	2	PF04756.6	4.9e-19	68.1	OST3_OST6	OST3 / OST6 family
BB454ONE001661	4	PF01423.15	1.2e-11	43.6	LSM	LSM domain
BB454ONE001663	1	PF00536.23	1.4e-17	63.3	SAM_1	SAM domain (Sterile alpha motif)
BB454ONE001663	1	PF07647.10	5e-11	41.9	SAM_2	SAM domain (Sterile alpha motif)
BB454ONE001668	5	PF01121.13	5.4e-07	28.8	CoaE	Dephospho-CoA kinase
BB454ONE001671	6	PF05162.6	2.2e-10	39.6	Ribosomal_L41	Ribosomal protein L41
BB454ONE001674	1	PF00453.11	2.8e-29	100.8	Ribosomal_L20	Ribosomal protein L20
BB454ONE001675	2	PF02269.9	1.1e-35	121	TFIID-18kDa	Transcription initiation factor IID, 18kD subunit
BB454ONE001681	4	PF04110.6	2.7e-13	49.6	APG12	Ubiquitin-like autophagy protein Apg12
BB454ONE001682	1	PF00254.21	7.3e-37	125	FKBP_C	FKBP-type peptidyl-prolyl cis-trans isomerase
BB454ONE001683	2	PF07690.9	8.6e-08	31	MFS_1	Major Facilitator Superfamily
BB454ONE001694	2	PF01439.11	5.3e-23	81	Metallothio_2	Metallothionein
BB454ONE001698	2	PF03372.16	2.7e-07	29.6	Exo_endo_phos	Endonuclease/Exonuclease/phosphatase family
BB454ONE001716	1	PF00403.19	4.9e-11	42.3	HMA	Heavy-metal-associated domain
BB454ONE001717	1	PF02779.17	5.1e-45	152.8	Transket_pyr	Transketolase, pyrimidine binding domain
BB454ONE001719	2	PF09336.3	9.8e-09	34.6	Vps4_C	Vps4 C terminal oligomerisation domain
BB454ONE001727	1	PF08991.3	9.4e-18	63.7	DUF1903	Domain of unknown function (DUF1903)
BB454ONE001732	1	PF00307.24	3.2e-12	46	CH	Calponin homology (CH) domain
BB454ONE001737	6	PF00025.14	7.2e-09	34.8	Arf	ADP-ribosylation factor family
BB454ONE001738	5	PF08561.3	1.4e-18	65.9	Ribosomal_L37	Mitochondrial ribosomal protein L37
BB454ONE001740	1	PF07019.5	3.4e-14	52.4	Rab5ip	Rab5-interacting protein (Rab5ip)
BB454ONE001740	6	PF00080.13	1.2e-50	171.1	Sod_Cu	Copper/zinc superoxide dismutase (SODC)
BB454ONE001743	5	PF00379.16	1.2e-07	31.5	Chitin_bind_4	Insect cuticle protein
BB454ONE001744	3	PF00428.12	2.9e-26	91.3	Ribosomal_60s	60s Acidic ribosomal protein
BB454ONE001746	2	PF00828.12	1.1e-36	125.6	Ribosomal_L18e	Ribosomal protein L18e/L15
BB454ONE001747	4	PF06403.4	2.2e-06	27.1	Lamprin	Lamprin
BB454ONE001748	1	PF05529.5	3.3e-53	179.7	Bap31	B-cell receptor-associated protein 31-like
BB454ONE001751	6	PF00238.12	4.5e-35	119.7	Ribosomal_L14	Ribosomal protein L14p/L23e
BB454ONE001752	1	PF01780.12	2e-37	126.5	Ribosomal_L37ae	Ribosomal L37ae protein family
BB454ONE001753	6	PF01395.15	3.9e-12	45.5	PBP_GOBP	PBP/GOBP family
BB454ONE001754	2	PF04419.7	1.3e-13	50.9	4F5	4F5 protein family
BB454ONE001757	4	PF02769.15	5.7e-25	87.7	AIRS_C	AIR synthase related protein, C-terminal domain
BB454ONE001765	1	PF00416.15	9.7e-41	138.2	Ribosomal_S13	Ribosomal protein S13/S18
BB454ONE001769	1	PF02970.9	9.1e-07	28.5	TBCA	Tubulin binding cofactor A
BB454ONE001769	3	PF02970.9	3.4e-08	33.1	TBCA	Tubulin binding cofactor A
BB454ONE001777	2	PF01779.10	2.2e-23	81.4	Ribosomal_L29e	Ribosomal L29e protein family
BB454ONE001779	2	PF05051.6	1.2e-23	82.5	COX17	Cytochrome C oxidase copper chaperone (COX17)
BB454ONE001782	2	PF00253.14	5.6e-20	70.1	Ribosomal_S14	Ribosomal protein S14p/S29e
BB454ONE001783	6	PF07464.4	8e-07	28.5	ApoLp-III	Apolipophorin-III precursor (apoLp-III)
BB454ONE001786	2	PF01086.10	1.4e-18	67.3	Clathrin_lg_ch	Clathrin light chain
BB454ONE001788	5	PF11105.1	9e-19	67.2	CCAP	Arthropod cardioacceleratory peptide 2a
BB454ONE001792	6	PF10224.2	8.6e-17	60.1	DUF2205	Predicted coiled-coil protein (DUF2205)
BB454ONE001799	1	PF06094.5	1e-20	73.8	AIG2	AIG2-like family
BB454ONE001803	2	PF02089.8	3.7e-18	65.1	Palm_thioest	Palmitoyl protein thioesterase
BB454ONE001805	5	PF00407.12	1e-23	83.2	Bet_v_1	Pathogenesis-related protein Bet v I family
BB454ONE001823	1	PF00676.13	6.3e-17	60.9	E1_dh	Dehydrogenase E1 component
BB454ONE001826	1	PF01194.10	1.4e-30	104.8	RNA_pol_N	RNA polymerases N / 8 kDa subunit
BB454ONE001834	3	PF00012.13	1.8e-52	177.7	HSP70	Hsp70 protein
BB454ONE001834	6	PF10712.2	6.3e-28	97.1	NAD-GH	NAD-specific glutamate dehydrogenase
BB454ONE001839	5	PF00645.11	1.7e-18	66.3	zf-PARP	Poly(ADP-ribose) polymerase and DNA-Ligase Zn-finger region
BB454ONE001840	1	PF00062.13	6.6e-19	67.8	Lys	C-type lysozyme/alpha-lactalbumin family
BB454ONE001845	2	PF01268.12	1.2e-31	109	FTHFS	Formate--tetrahydrofolate ligase
BB454ONE001851	5	PF07544.6	2.2e-12	46.1	Med9	RNA polymerase II transcription mediator complex subunit 9
BB454ONE001854	4	PF00462.17	1e-17	63.5	Glutaredoxin	Glutaredoxin
BB454ONE001855	1	PF00069.18	2.7e-15	55.9	Pkinase	Protein kinase domain
BB454ONE001855	1	PF07714.10	1.1e-07	30.9	Pkinase_Tyr	Protein tyrosine kinase
BB454ONE001855	2	PF00069.18	1.1e-16	60.4	Pkinase	Protein kinase domain
BB454ONE001861	5	PF00118.17	2.8e-26	91.8	Cpn60_TCP1	TCP-1/cpn60 chaperonin family
BB454ONE001863	2	PF08661.4	1.1e-13	50.7	Rep_fac-A_3	Replication factor A protein 3
BB454ONE001868	3	PF01632.12	9.7e-11	41.1	Ribosomal_L35p	Ribosomal protein L35
BB454ONE001869	3	PF01781.11	7.7e-33	111.7	Ribosomal_L38e	Ribosomal L38e protein family
BB454ONE001875	6	PF01363.14	1.8e-06	27.4	FYVE	FYVE zinc finger
BB454ONE001876	5	PF00276.13	2.4e-09	36.6	Ribosomal_L23	Ribosomal protein L23
BB454ONE001877	2	PF00153.20	2.6e-20	71.6	Mito_carr	Mitochondrial carrier protein
BB454ONE001881	2	PF03937.9	1.1e-08	34.5	Sdh5	Protein of unknown function (DUF339)
BB454ONE001884	2	PF05375.6	9.9e-06	24.6	Pacifastin_I	Pacifastin inhibitor (LCMII)
BB454ONE001885	4	PF01124.11	2.8e-25	88	MAPEG	MAPEG family
BB454ONE001886	1	PF00062.13	3e-16	59.2	Lys	C-type lysozyme/alpha-lactalbumin family
BB454ONE001887	1	PF10169.2	1.3e-22	80	Laps	Learning-associated protein
BB454ONE001888	2	PF00062.13	2.8e-18	65.7	Lys	C-type lysozyme/alpha-lactalbumin family
BB454ONE001890	2	PF03623.6	7.7e-15	54.2	Focal_AT	Focal adhesion targeting region
BB454ONE001891	3	PF00106.18	4.5e-32	110.9	adh_short	short chain dehydrogenase
BB454ONE001891	3	PF08659.3	2.5e-12	46.4	KR	KR domain
BB454ONE001892	6	PF00293.21	4.5e-13	48.6	NUDIX	NUDIX domain
BB454ONE001893	2	PF01182.13	4.3e-46	156.7	Glucosamine_iso	Glucosamine-6-phosphate isomerases/6-phosphogluconolactonase
BB454ONE001894	2	PF01344.18	8.3e-17	60.1	Kelch_1	Kelch motif
BB454ONE001894	2	PF07646.8	4.7e-07	29.2	Kelch_2	Kelch motif
BB454ONE001896	1	PF00080.13	1.5e-32	112.3	Sod_Cu	Copper/zinc superoxide dismutase (SODC)
BB454ONE001896	1	PF00403.19	1.1e-08	34.8	HMA	Heavy-metal-associated domain
BB454ONE001898	2	PF00163.12	8.6e-28	96.2	Ribosomal_S4	Ribosomal protein S4/S9 N-terminal domain
BB454ONE001898	2	PF01479.18	1.4e-13	49.6	S4	S4 domain
BB454ONE001900	3	PF00378.13	1.1e-18	66.8	ECH	Enoyl-CoA hydratase/isomerase family
BB454ONE001901	5	PF00106.18	4.9e-12	45.7	adh_short	short chain dehydrogenase
BB454ONE001903	2	PF09415.3	6.6e-09	35.1	DUF2008	Protein of unknown function (DUF2008)
BB454ONE001905	3	PF00076.15	7.2e-15	54	RRM_1	RNA recognition motif. (a.k.a. RRM, RBD, or RNP domain)
BB454ONE001907	3	PF01984.13	2e-24	85.3	dsDNA_bind	Double-stranded DNA-binding domain
BB454ONE001908	2	PF00648.14	5e-27	94.3	Peptidase_C2	Calpain family cysteine protease
BB454ONE001910	3	PF00041.14	3.4e-12	46	fn3	Fibronectin type III domain
BB454ONE001911	1	PF03144.18	6.2e-07	29.1	GTP_EFTU_D2	Elongation factor Tu domain 2
BB454ONE001913	5	PF00808.16	6.7e-14	51.3	CBFD_NFYB_HMF	Histone-like transcription factor (CBF/NF-Y) and archaeal histone
BB454ONE001919	3	PF03096.7	1.5e-86	289	Ndr	Ndr family
BB454ONE001923	1	PF00083.17	7.3e-23	80.5	Sugar_tr	Sugar (and other) transporter
BB454ONE001925	6	PF07714.10	6.8e-21	74.2	Pkinase_Tyr	Protein tyrosine kinase
BB454ONE001925	6	PF00069.18	9.1e-10	37.8	Pkinase	Protein kinase domain
BB454ONE001926	5	PF07679.9	2.9e-14	52.4	I-set	Immunoglobulin I-set domain
BB454ONE001926	5	PF00047.18	1.1e-08	34.7	ig	Immunoglobulin domain
BB454ONE001926	5	PF07648.8	8.4e-06	25.3	Kazal_2	Kazal-type serine protease inhibitor domain
BB454ONE001926	5	PF07686.10	6.8e-06	25.6	V-set	Immunoglobulin V-set domain
BB454ONE001927	5	PF00080.13	3.2e-35	121	Sod_Cu	Copper/zinc superoxide dismutase (SODC)
BB454ONE001929	5	PF01130.14	5.8e-14	50.9	CD36	CD36 family
BB454ONE001930	2	PF04209.6	1.6e-43	148.4	HgmA	homogentisate 1,2-dioxygenase
BB454ONE001935	6	PF03540.6	5.1e-25	86.7	TFIID_30kDa	Transcription initiation factor TFIID 23-30kDa subunit
BB454ONE001936	4	PF00037.20	1.1e-08	34	Fer4	4Fe-4S binding domain
BB454ONE001938	6	PF05773.15	6.2e-20	70.9	RWD	RWD domain
BB454ONE001942	1	PF04587.8	2.3e-28	98.3	ADP_PFK_GK	ADP-specific Phosphofructokinase/Glucokinase conserved region
BB454ONE001943	1	PF04144.6	1.1e-55	187.9	SCAMP	SCAMP family
BB454ONE001944	2	PF00379.16	1.5e-14	53.6	Chitin_bind_4	Insect cuticle protein
BB454ONE001945	4	PF00379.16	8.9e-15	54.4	Chitin_bind_4	Insect cuticle protein
BB454ONE001949	2	PF02990.9	8.1e-35	119.9	EMP70	Endomembrane protein 70
BB454ONE001952	2	PF00179.19	2.9e-49	165.7	UQ_con	Ubiquitin-conjugating enzyme
BB454ONE001953	1	PF02550.8	2e-07	30.6	AcetylCoA_hydro	Acetyl-CoA hydrolase/transferase N-terminal domain
BB454ONE001955	6	PF01121.13	4.5e-42	143.1	CoaE	Dephospho-CoA kinase
BB454ONE001956	1	PF09725.2	1.8e-50	169.6	Fra10Ac1	Folate-sensitive fragile site protein Fra10Ac1
BB454ONE001958	4	PF00335.13	7.8e-06	25	Tetraspannin	Tetraspanin family
BB454ONE001960	4	PF07228.5	8e-12	44.9	SpoIIE	Stage II sporulation protein E (SpoIIE)
BB454ONE001965	5	PF10036.2	4.1e-32	111.2	RLL	Putative carnitine deficiency-associated protein
BB454ONE001968	2	PF08040.4	1.7e-18	65.6	NADH_oxidored	MNLL subunit
BB454ONE001970	6	PF00036.25	1e-09	36.7	efhand	EF hand
BB454ONE001971	2	PF00270.22	6.3e-10	38.4	DEAD	DEAD/DEAH box helicase
BB454ONE001973	2	PF05454.4	2.2e-42	144.9	DAG1	Dystroglycan (Dystrophin-associated glycoprotein 1)
BB454ONE001974	2	PF00398.13	2.9e-23	81.9	RrnaAD	Ribosomal RNA adenine dimethylase
BB454ONE001975	2	PF02516.7	5.5e-08	31.4	STT3	Oligosaccharyl transferase STT3 subunit
BB454ONE001976	4	PF06825.5	1.6e-25	88.1	HSBP1	Heat shock factor binding protein 1
BB454ONE001977	3	PF00956.11	7e-12	44.6	NAP	Nucleosome assembly protein (NAP)
BB454ONE001978	6	PF00085.13	8.5e-29	98.9	Thioredoxin	Thioredoxin
BB454ONE001984	5	PF01280.13	6.7e-33	113.2	Ribosomal_L19e	Ribosomal protein L19e
BB454ONE001984	6	PF01280.13	3.6e-24	84.9	Ribosomal_L19e	Ribosomal protein L19e
BB454ONE001986	6	PF00254.21	6.1e-29	99.6	FKBP_C	FKBP-type peptidyl-prolyl cis-trans isomerase
BB454ONE001987	6	PF00230.13	2.4e-65	219.8	MIP	Major intrinsic protein
BB454ONE001992	5	PF00675.13	5.4e-22	77.8	Peptidase_M16	Insulinase (Peptidase family M16)
BB454ONE001992	5	PF05193.14	1.3e-17	63.7	Peptidase_M16_C	Peptidase M16 inactive domain
BB454ONE001993	5	PF10591.2	9.7e-24	83.2	SPARC_Ca_bdg	Secreted protein acidic and rich in cysteine Ca binding region
BB454ONE001994	5	PF01261.17	3.9e-11	42.3	AP_endonuc_2	Xylose isomerase-like TIM barrel
BB454ONE001995	4	PF01435.11	5.9e-34	117.2	Peptidase_M48	Peptidase family M48
BB454ONE001997	3	PF08155.4	9.8e-22	76.1	NOGCT	NOGCT (NUC087) domain
BB454ONE001998	2	PF00071.15	6.3e-31	106.6	Ras	Ras family
BB454ONE001998	2	PF08477.6	7.7e-13	48.6	Miro	Miro-like protein
BB454ONE001998	2	PF00025.14	2.8e-08	32.9	Arf	ADP-ribosylation factor family
BB454ONE002003	4	PF00226.24	8.6e-06	25	DnaJ	DnaJ domain
BB454ONE002003	5	PF00226.24	5.9e-11	41.6	DnaJ	DnaJ domain
BB454ONE002004	5	PF01145.18	1.3e-08	34.6	Band_7	SPFH domain / Band 7 family
BB454ONE002006	5	PF01851.15	3.6e-10	39.2	PC_rep	Proteasome/cyclosome repeat
BB454ONE002007	1	PF00307.24	2.1e-09	37	CH	Calponin homology (CH) domain
BB454ONE002010	4	PF00650.13	3.2e-22	78.2	CRAL_TRIO	CRAL/TRIO domain
BB454ONE002011	2	PF04083.9	9.2e-12	43.8	Abhydro_lipase	ab-hydrolase associated lipase region
BB454ONE002011	2	PF00561.13	4.3e-07	29.3	Abhydrolase_1	alpha/beta hydrolase fold
BB454ONE002012	5	PF00575.16	1.3e-18	66.5	S1	S1 RNA binding domain
BB454ONE002015	5	PF00658.11	1.9e-29	100.8	PABP	Poly-adenylate binding protein, unique domain
BB454ONE002016	4	PF10601.2	8.3e-23	79.7	zf-LITAF-like	LITAF-like zinc ribbon domain
BB454ONE002017	2	PF01439.11	5.9e-20	71.2	Metallothio_2	Metallothionein
BB454ONE002018	4	PF05456.4	8.9e-35	118.5	eIF_4EBP	Eukaryotic translation initiation factor 4E binding protein (EIF4EBP)
BB454ONE002024	4	PF00478.18	7.6e-21	74	IMPDH	IMP dehydrogenase / GMP reductase domain
BB454ONE002027	3	PF10206.2	2.4e-48	162.1	WRW	Mitochondrial F1F0-ATP synthase, subunit f
BB454ONE002029	5	PF00307.24	4.2e-16	58.5	CH	Calponin homology (CH) domain
BB454ONE002031	6	PF03949.8	6.1e-44	150.1	Malic_M	Malic enzyme, NAD binding domain
BB454ONE002032	3	PF03637.10	4.3e-29	101	Mob1_phocein	Mob1/phocein family
BB454ONE002033	4	PF00412.15	4.8e-14	51.8	LIM	LIM domain
BB454ONE002035	1	PF00569.10	8.2e-14	50.5	ZZ	Zinc finger, ZZ type
BB454ONE002035	1	PF00564.17	5e-06	25.7	PB1	PB1 domain
BB454ONE002036	4	PF00179.19	1.7e-23	82.2	UQ_con	Ubiquitin-conjugating enzyme
BB454ONE002038	1	PF00928.14	7.9e-07	28.1	Adap_comp_sub	Adaptor complexes medium subunit family
BB454ONE002038	3	PF00928.14	1.9e-17	62.9	Adap_comp_sub	Adaptor complexes medium subunit family
BB454ONE002039	3	PF06585.4	2e-23	82.1	JHBP	Haemolymph juvenile hormone binding protein (JHBP)
BB454ONE002042	3	PF03066.8	1e-39	135.1	Nucleoplasmin	Nucleoplasmin
BB454ONE002043	1	PF00833.11	9.8e-59	196.1	Ribosomal_S17e	Ribosomal S17
BB454ONE002045	1	PF00379.16	1.2e-14	53.9	Chitin_bind_4	Insect cuticle protein
BB454ONE002047	2	PF00062.13	2.2e-34	117.8	Lys	C-type lysozyme/alpha-lactalbumin family
BB454ONE002048	2	PF01301.12	3.1e-39	134.9	Glyco_hydro_35	Glycosyl hydrolases family 35
BB454ONE002049	1	PF00179.19	1.3e-35	121.4	UQ_con	Ubiquitin-conjugating enzyme
BB454ONE002054	4	PF01215.12	3.4e-16	58.7	COX5B	Cytochrome c oxidase subunit Vb
BB454ONE002055	4	PF07687.7	9.2e-15	54	M20_dimer	Peptidase dimerisation domain
BB454ONE002056	3	PF00557.17	4e-06	26.3	Peptidase_M24	Metallopeptidase family M24
BB454ONE002057	1	PF03348.8	2.3e-47	161.3	Serinc	Serine incorporator (Serinc)
BB454ONE002058	4	PF10197.2	7.5e-13	48	Cir_N	N-terminal domain of CBF1 interacting co-repressor CIR
BB454ONE002059	6	PF04427.11	1.8e-27	95.9	Brix	Brix domain
BB454ONE002060	2	PF00270.22	4e-09	35.8	DEAD	DEAD/DEAH box helicase
BB454ONE002060	3	PF00270.22	2.8e-22	78.6	DEAD	DEAD/DEAH box helicase
BB454ONE002062	3	PF03188.9	8.4e-22	77.1	Cytochrom_B561	Eukaryotic cytochrome b561
BB454ONE002064	6	PF00240.16	2.1e-34	116.3	ubiquitin	Ubiquitin family
BB454ONE002064	6	PF11976.1	1.5e-19	69	Rad60-SLD	Ubiquitin-2 like Rad60 SUMO-like
BB454ONE002065	1	PF00384.15	5.2e-36	124	Molybdopterin	Molybdopterin oxidoreductase
BB454ONE002065	3	PF09326.4	4.2e-13	48.9	DUF1982	Domain of unknown function (DUF1982)
BB454ONE002066	6	PF01395.15	7.6e-07	28.4	PBP_GOBP	PBP/GOBP family
BB454ONE002067	2	PF09811.2	4.2e-07	29.1	Yae1_N	Essential protein Yae1, N terminal
BB454ONE002069	2	PF00022.12	3.8e-24	84.5	Actin	Actin
BB454ONE002072	4	PF04506.6	1.1e-08	33.6	Rft-1	Rft protein
BB454ONE002073	5	PF00378.13	4.2e-07	29.1	ECH	Enoyl-CoA hydratase/isomerase family
BB454ONE002076	5	PF01019.14	2.3e-52	177.8	G_glu_transpept	Gamma-glutamyltranspeptidase
BB454ONE002077	5	PF07992.7	1.7e-14	53.4	Pyr_redox_2	Pyridine nucleotide-disulphide oxidoreductase
BB454ONE002078	5	PF08240.5	1e-20	73.1	ADH_N	Alcohol dehydrogenase GroES-like domain
BB454ONE002079	2	PF00382.12	3.3e-25	87.3	TFIIB	Transcription factor TFIIB repeat
BB454ONE002079	2	PF08271.5	2.6e-11	42.2	TF_Zn_Ribbon	TFIIB zinc-binding
BB454ONE002081	4	PF00005.20	9.7e-10	38.5	ABC_tran	ABC transporter
BB454ONE002082	5	PF00153.20	2.7e-19	68.3	Mito_carr	Mitochondrial carrier protein
BB454ONE002084	2	PF02953.8	2.2e-16	58.5	zf-Tim10_DDP	Tim10/DDP family zinc finger
BB454ONE002087	5	PF08315.5	1.2e-35	122.4	cwf18	cwf18 pre-mRNA splicing factor
BB454ONE002088	5	PF00542.12	3.7e-18	64.9	Ribosomal_L12	Ribosomal protein L7/L12 C-terminal domain
BB454ONE002092	5	PF12583.1	1.1e-12	48	TPPII_N	Tripeptidyl peptidase II N terminal
BB454ONE002093	5	PF00501.21	4.4e-21	74.4	AMP-binding	AMP-binding enzyme
BB454ONE002094	2	PF00179.19	1.1e-11	43.9	UQ_con	Ubiquitin-conjugating enzyme
BB454ONE002095	6	PF00658.11	1.5e-12	46.7	PABP	Poly-adenylate binding protein, unique domain
BB454ONE002098	4	PF01025.12	8.8e-34	116.1	GrpE	GrpE
BB454ONE002099	6	PF05292.4	3.3e-28	98	MCD	Malonyl-CoA decarboxylase (MCD)
BB454ONE002103	6	PF07679.9	2.4e-14	52.7	I-set	Immunoglobulin I-set domain
BB454ONE002104	5	PF09731.2	2.7e-08	32.6	Mitofilin	Mitochondrial inner membrane protein
BB454ONE002108	4	PF02297.10	2e-16	59.4	COX6B	Cytochrome oxidase c subunit VIb
BB454ONE002109	6	PF00462.17	1e-20	73.1	Glutaredoxin	Glutaredoxin
BB454ONE002112	3	PF03719.8	2.7e-19	67.9	Ribosomal_S5_C	Ribosomal protein S5, C-terminal domain
BB454ONE002113	2	PF01168.13	1.3e-07	31.1	Ala_racemase_N	Alanine racemase, N-terminal domain
BB454ONE002114	5	PF05428.4	4.8e-73	245.3	CRF-BP	Corticotropin-releasing factor binding protein (CRF-BP)
BB454ONE002115	5	PF00111.20	4.5e-08	32.4	Fer2	2Fe-2S iron-sulfur cluster binding domain
BB454ONE002121	5	PF05486.5	4.2e-23	80.5	SRP9-21	Signal recognition particle 9 kDa protein (SRP9)
BB454ONE002122	5	PF04568.5	2e-28	98	IATP	Mitochondrial ATPase inhibitor, IATP
BB454ONE002123	6	PF11969.1	3.4e-29	101.1	DcpS_C	Scavenger mRNA decapping enzyme C-term binding
BB454ONE002123	6	PF01230.16	6.8e-11	42.2	HIT	HIT domain
BB454ONE002124	2	PF08806.4	6.4e-19	67.1	Sep15_SelM	Sep15/SelM redox domain
BB454ONE002125	6	PF01423.15	5.5e-18	63.8	LSM	LSM domain
BB454ONE002126	3	PF03942.8	1.2e-15	56.9	DTW	DTW domain
BB454ONE002127	2	PF00179.19	4e-40	136.1	UQ_con	Ubiquitin-conjugating enzyme
BB454ONE002131	3	PF03392.6	6.8e-41	137.8	OS-D	Insect pheromone-binding family, A10/OS-D
BB454ONE002133	1	PF05093.6	3.3e-24	84.5	CIAPIN1	Cytokine-induced anti-apoptosis inhibitor 1, Fe-S biogenesis
BB454ONE002134	1	PF01423.15	1e-18	66.2	LSM	LSM domain
BB454ONE002137	2	PF00224.14	1.3e-34	119.1	PK	Pyruvate kinase, barrel domain
BB454ONE002138	2	PF00400.25	1e-10	40.7	WD40	WD domain, G-beta repeat
BB454ONE002140	4	PF00583.17	1.1e-11	44.2	Acetyltransf_1	Acetyltransferase (GNAT) family
BB454ONE002141	6	PF01922.10	4.1e-25	87.8	SRP19	SRP19 protein
BB454ONE002143	5	PF00828.12	7.1e-21	74.6	Ribosomal_L18e	Ribosomal protein L18e/L15
BB454ONE002144	5	PF09808.2	1.8e-32	112.3	SNAPc_SNAP43	Small nuclear RNA activating complex (SNAPc), subunit SNAP43
BB454ONE002145	5	PF01256.10	3.3e-10	39.3	Carb_kinase	Carbohydrate kinase
BB454ONE002149	5	PF01655.11	6.4e-49	164.2	Ribosomal_L32e	Ribosomal protein L32
BB454ONE002150	2	PF03131.10	1.8e-37	127.2	bZIP_Maf	bZIP Maf transcription factor
BB454ONE002151	4	PF01513.14	1.2e-20	73.2	NAD_kinase	ATP-NAD kinase
BB454ONE002154	4	PF03133.8	1.3e-07	30.5	TTL	Tubulin-tyrosine ligase family
BB454ONE002157	2	PF05010.7	8.6e-36	123.3	TACC	Transforming acidic coiled-coil-containing protein (TACC)
BB454ONE002158	5	PF03637.10	9.5e-29	99.9	Mob1_phocein	Mob1/phocein family
BB454ONE002158	6	PF03637.10	7.8e-24	83.9	Mob1_phocein	Mob1/phocein family
BB454ONE002160	2	PF01496.12	9.7e-78	261.4	V_ATPase_I	V-type ATPase 116kDa subunit family
BB454ONE002162	3	PF04280.8	4.9e-25	87.9	Tim44	Tim44-like domain
BB454ONE002162	3	PF07961.4	2.1e-06	26.4	MBA1	MBA1-like protein
BB454ONE002163	3	PF00743.12	1.3e-20	72.8	FMO-like	Flavin-binding monooxygenase-like
BB454ONE002165	6	PF00443.22	2.4e-13	49.4	UCH	Ubiquitin carboxyl-terminal hydrolase
BB454ONE002165	6	PF00627.24	2.6e-06	26.7	UBA	UBA/TS-N domain
BB454ONE002166	4	PF00089.19	2.7e-32	111.8	Trypsin	Trypsin
BB454ONE002166	5	PF00089.19	2.1e-12	46.8	Trypsin	Trypsin
BB454ONE002167	2	PF00198.16	4.3e-30	104.3	2-oxoacid_dh	2-oxoacid dehydrogenases acyltransferase (catalytic domain)
BB454ONE002168	2	PF10961.1	9.3e-10	38.4	DUF2763	Protein of unknown function (DUF2763)
BB454ONE002175	2	PF07525.9	4.8e-13	48.4	SOCS_box	SOCS box
BB454ONE002176	1	PF00240.16	1.3e-08	33.6	ubiquitin	Ubiquitin family
BB454ONE002177	4	PF04184.5	2.8e-29	101.4	ST7	ST7 protein
BB454ONE002177	6	PF04184.5	4.6e-24	84.2	ST7	ST7 protein
BB454ONE002178	1	PF06625.4	3.3e-29	100.7	DUF1151	Protein of unknown function (DUF1151)
BB454ONE002182	4	PF02574.9	2.1e-15	56.5	S-methyl_trans	Homocysteine S-methyltransferase
BB454ONE002187	6	PF03828.12	2.5e-10	39.9	PAP_assoc	Poly(A) polymerase
BB454ONE002188	2	PF00089.19	2.6e-29	102	Trypsin	Trypsin
BB454ONE002190	2	PF01395.15	7.8e-07	28.4	PBP_GOBP	PBP/GOBP family
BB454ONE002191	4	PF05071.9	1.9e-29	101.8	NDUFA12	NADH ubiquinone oxidoreductase subunit NDUFA12
BB454ONE002193	4	PF01148.13	6.9e-30	104.2	CTP_transf_1	Cytidylyltransferase family
BB454ONE002201	3	PF00215.17	9.3e-08	31.4	OMPdecase	Orotidine 5'-phosphate decarboxylase / HUMPS family
BB454ONE002202	3	PF02046.8	2.4e-25	88.4	COX6A	Cytochrome c oxidase subunit VIa
BB454ONE002204	1	PF07915.6	4.4e-08	33.5	PRKCSH	Glucosidase II beta subunit-like protein
BB454ONE002205	2	PF04716.7	9.1e-20	69.6	ETC_C1_NDUFA5	ETC complex I subunit conserved region
BB454ONE002206	6	PF00330.13	1.2e-58	198.4	Aconitase	Aconitase family (aconitate hydratase)
BB454ONE002207	1	PF03969.9	3.8e-66	223	AFG1_ATPase	AFG1-like ATPase
BB454ONE002210	3	PF09495.3	9.2e-10	38.8	DUF2462	Protein of unknown function (DUF2462)
BB454ONE002212	1	PF09816.2	1.5e-20	72.8	EAF	RNA polymerase II transcription elongation factor
BB454ONE002216	4	PF01257.12	5.8e-63	210.5	Complex1_24kDa	Respiratory-chain NADH dehydrogenase 24 Kd subunit
BB454ONE002217	6	PF03946.7	2.8e-26	90.4	Ribosomal_L11_N	Ribosomal protein L11, N-terminal domain
BB454ONE002217	6	PF00298.12	1.6e-17	63	Ribosomal_L11	Ribosomal protein L11, RNA binding domain
BB454ONE002222	3	PF01196.12	2.3e-13	50.2	Ribosomal_L17	Ribosomal protein L17
BB454ONE002224	5	PF04815.8	2.1e-37	126.3	Sec23_helical	Sec23/Sec24 helical domain
BB454ONE002226	1	PF08122.5	1e-16	60	NDUF_B12	NADH-ubiquinone oxidoreductase B12 subunit family
BB454ONE002229	1	PF01192.15	2.7e-19	68.3	RNA_pol_Rpb6	RNA polymerase Rpb6
BB454ONE002230	1	PF02637.11	1.8e-26	92.3	GatB_Yqey	GatB domain
BB454ONE002231	5	PF00001.14	9.5e-11	41	7tm_1	7 transmembrane receptor (rhodopsin family)
BB454ONE002232	1	PF00833.11	5.1e-41	138.9	Ribosomal_S17e	Ribosomal S17
BB454ONE002232	2	PF00833.11	1e-10	41.1	Ribosomal_S17e	Ribosomal S17
BB454ONE002236	3	PF00179.19	1.6e-33	114.7	UQ_con	Ubiquitin-conjugating enzyme
BB454ONE002241	1	PF03650.6	3.6e-39	133	UPF0041	Uncharacterised protein family (UPF0041)
BB454ONE002242	5	PF00282.12	6.1e-41	139.7	Pyridoxal_deC	Pyridoxal-dependent decarboxylase conserved domain
BB454ONE002246	1	PF01423.15	1.5e-14	52.9	LSM	LSM domain
BB454ONE002247	3	PF08694.4	1.2e-84	281.3	UFC1	Ubiquitin-fold modifier-conjugating enzyme 1
BB454ONE002253	3	PF04774.8	2e-07	31.1	HABP4_PAI-RBP1	Hyaluronan / mRNA binding family
BB454ONE002255	4	PF00153.20	7e-19	67	Mito_carr	Mitochondrial carrier protein
BB454ONE002257	1	PF10218.2	7.7e-48	161.3	DUF2054	Uncharacterized conserved protein (DUF2054)
BB454ONE002258	1	PF01395.15	1.2e-23	82.6	PBP_GOBP	PBP/GOBP family
BB454ONE002259	2	PF04695.6	8.4e-16	57.9	Pex14_N	Peroxisomal membrane anchor protein (Pex14p) conserved region
BB454ONE002263	6	PF00151.12	3.6e-43	147.7	Lipase	Lipase
BB454ONE002266	3	PF08285.4	4.5e-26	90.1	DPM3	Dolichol-phosphate mannosyltransferase subunit 3 (DPM3)
BB454ONE002267	4	PF03985.6	5.7e-51	173.3	Paf1	Paf1
BB454ONE002269	2	PF00572.11	7e-31	106.6	Ribosomal_L13	Ribosomal protein L13
BB454ONE002271	6	PF04117.5	3e-25	87.3	Mpv17_PMP22	Mpv17 / PMP22 family
BB454ONE002273	4	PF05832.5	4.9e-18	64.9	DUF846	Eukaryotic protein of unknown function (DUF846)
BB454ONE002273	6	PF05832.5	6.4e-07	28.8	DUF846	Eukaryotic protein of unknown function (DUF846)
BB454ONE002274	5	PF06068.6	2e-51	174.6	TIP49	TIP49 C-terminus
BB454ONE002275	6	PF01061.17	1.4e-22	79.5	ABC2_membrane	ABC-2 type transporter
BB454ONE002277	4	PF06726.5	1.7e-23	82	BC10	Bladder cancer-related protein BC10
BB454ONE002278	4	PF01564.10	2.4e-10	39.4	Spermine_synth	Spermine/spermidine synthase
BB454ONE002278	5	PF01564.10	8.6e-36	122.7	Spermine_synth	Spermine/spermidine synthase
BB454ONE002279	5	PF00271.24	1.8e-11	43.4	Helicase_C	Helicase conserved C-terminal domain
BB454ONE002281	5	PF12353.1	5.6e-40	135.8	eIF3g	Eukaryotic translation initiation factor 3 subunit G
BB454ONE002281	6	PF00076.15	1e-12	47.1	RRM_1	RNA recognition motif. (a.k.a. RRM, RBD, or RNP domain)
BB454ONE002282	2	PF03939.6	2.6e-19	68.6	Ribosomal_L23eN	Ribosomal protein L23, N-terminal domain
BB454ONE002282	2	PF00276.13	1.8e-17	62.7	Ribosomal_L23	Ribosomal protein L23
BB454ONE002283	3	PF00406.15	3.7e-59	198.6	ADK	Adenylate kinase
BB454ONE002283	3	PF05191.7	1.5e-12	46.6	ADK_lid	Adenylate kinase, active site lid
BB454ONE002287	6	PF00226.24	1.8e-13	49.6	DnaJ	DnaJ domain
BB454ONE002288	5	PF00106.18	3.7e-10	39.6	adh_short	short chain dehydrogenase
BB454ONE002290	6	PF00664.16	3.8e-32	111.4	ABC_membrane	ABC transporter transmembrane region
BB454ONE002291	3	PF02991.9	5.8e-47	157.6	MAP1_LC3	Microtubule associated protein 1A/1B, light chain 3
BB454ONE002292	4	PF00076.15	1e-10	40.7	RRM_1	RNA recognition motif. (a.k.a. RRM, RBD, or RNP domain)
BB454ONE002294	3	PF05493.6	1.2e-26	92.2	ATP_synt_H	ATP synthase subunit H
BB454ONE002295	6	PF09782.2	9.9e-46	155.1	NDUF_B6	NADH:ubiquinone oxidoreductase, NDUFB6/B17 subunit
BB454ONE002296	4	PF10780.2	1.6e-09	37.3	MRP_L53	39S ribosomal protein L53/MRP-L53
BB454ONE002299	4	PF07426.4	2.5e-09	36.2	Dynactin_p22	Dynactin subunit p22
BB454ONE002300	1	PF05793.5	1.1e-41	142.5	TFIIF_alpha	Transcription initiation factor IIF, alpha subunit (TFIIF-alpha)
BB454ONE002300	3	PF05793.5	2.2e-44	151.4	TFIIF_alpha	Transcription initiation factor IIF, alpha subunit (TFIIF-alpha)
BB454ONE002301	1	PF00118.17	1.5e-26	92.7	Cpn60_TCP1	TCP-1/cpn60 chaperonin family
BB454ONE002302	6	PF00400.25	2.2e-06	27	WD40	WD domain, G-beta repeat
BB454ONE002306	4	PF00106.18	2.8e-23	82.3	adh_short	short chain dehydrogenase
BB454ONE002306	4	PF08659.3	3.6e-11	42.7	KR	KR domain
BB454ONE002308	3	PF04117.5	3.3e-25	87.2	Mpv17_PMP22	Mpv17 / PMP22 family
BB454ONE002309	4	PF06585.4	7.6e-56	188.3	JHBP	Haemolymph juvenile hormone binding protein (JHBP)
BB454ONE002310	3	PF00171.15	1e-16	60	Aldedh	Aldehyde dehydrogenase family
BB454ONE002311	4	PF00183.11	6.8e-35	120.1	HSP90	Hsp90 protein
BB454ONE002311	5	PF00183.11	5.2e-110	368	HSP90	Hsp90 protein
BB454ONE002312	2	PF01248.19	6.1e-29	99	Ribosomal_L7Ae	Ribosomal protein L7Ae/L30e/S12e/Gadd45 family
BB454ONE002313	6	PF00271.24	2.2e-09	36.7	Helicase_C	Helicase conserved C-terminal domain
BB454ONE002315	5	PF00753.20	9e-13	48	Lactamase_B	Metallo-beta-lactamase superfamily
BB454ONE002316	5	PF00135.21	2.6e-13	49.2	COesterase	Carboxylesterase
BB454ONE002317	5	PF01251.11	5.3e-82	273.5	Ribosomal_S7e	Ribosomal protein S7e
BB454ONE002318	2	PF04752.5	1.1e-53	181.4	ChaC	ChaC-like protein
BB454ONE002319	5	PF05705.7	1.6e-12	47.3	DUF829	Eukaryotic protein of unknown function (DUF829)
BB454ONE002320	3	PF04056.7	5.9e-10	38.5	Ssl1	Ssl1-like
BB454ONE002323	4	PF00227.19	1.7e-49	167.4	Proteasome	Proteasome subunit
BB454ONE002323	4	PF10584.2	2.9e-14	51.7	Proteasome_A_N	Proteasome subunit A N-terminal signature
BB454ONE002325	6	PF00310.14	4.2e-15	54.9	GATase_2	Glutamine amidotransferases class-II
BB454ONE002326	1	PF01576.12	2.5e-36	124.5	Myosin_tail_1	Myosin tail
BB454ONE002328	6	PF00083.17	2.1e-50	171.3	Sugar_tr	Sugar (and other) transporter
BB454ONE002328	6	PF07690.9	1.6e-28	99.1	MFS_1	Major Facilitator Superfamily
BB454ONE002332	5	PF11566.1	1.6e-27	95.4	Inhibitor_PI31	Proteasome Inhibitor PI31
BB454ONE002332	5	PF08577.4	4.7e-09	36.5	PI31_Prot_Reg	PI31 proteasome regulator
BB454ONE002333	6	PF00171.15	4e-34	117.4	Aldedh	Aldehyde dehydrogenase family
BB454ONE002334	1	PF03747.7	2.1e-24	86.4	ADP_ribosyl_GH	ADP-ribosylglycohydrolase
BB454ONE002335	3	PF00071.15	1.1e-39	135	Ras	Ras family
BB454ONE002335	3	PF08477.6	9.3e-17	61.3	Miro	Miro-like protein
BB454ONE002335	3	PF00025.14	1.1e-09	37.4	Arf	ADP-ribosylation factor family
BB454ONE002336	3	PF03194.8	2.9e-83	278.9	LUC7	LUC7 N_terminus
BB454ONE002340	2	PF00444.11	3.3e-12	45.8	Ribosomal_L36	Ribosomal protein L36
BB454ONE002341	4	PF01687.10	1.4e-36	124.8	Flavokinase	Riboflavin kinase
BB454ONE002345	4	PF05485.5	7.3e-10	38.5	THAP	THAP domain
BB454ONE002346	2	PF05348.4	5.3e-31	106.9	UMP1	Proteasome maturation factor UMP1
BB454ONE002348	4	PF01253.15	7.7e-28	95.8	SUI1	Translation initiation factor SUI1
BB454ONE002349	2	PF00106.18	3e-23	82.2	adh_short	short chain dehydrogenase
BB454ONE002349	2	PF08659.3	2.4e-07	30.2	KR	KR domain
BB454ONE002353	1	PF00487.17	2e-15	56.6	FA_desaturase	Fatty acid desaturase
BB454ONE002354	1	PF06212.5	5.8e-39	132.4	GRIM-19	GRIM-19 protein
BB454ONE002356	1	PF05434.4	7.3e-52	174.7	Tmemb_9	TMEM9
BB454ONE002357	2	PF03360.9	3.6e-10	39.4	Glyco_transf_43	Glycosyltransferase family 43
BB454ONE002357	3	PF03360.9	5.3e-44	149.9	Glyco_transf_43	Glycosyltransferase family 43
BB454ONE002358	6	PF00106.18	1.9e-34	118.6	adh_short	short chain dehydrogenase
BB454ONE002358	6	PF08659.3	5.6e-14	51.9	KR	KR domain
BB454ONE002359	5	PF04800.5	1.7e-35	120.5	ETC_C1_NDUFA4	ETC complex I subunit conserved region
BB454ONE002360	5	PF03694.6	3e-18	65.5	Erg28	Erg28 like protein
BB454ONE002363	4	PF00692.12	1.4e-43	147	dUTPase	dUTPase
BB454ONE002364	4	PF07074.5	4.1e-32	110.7	TRAP-gamma	Translocon-associated protein, gamma subunit (TRAP-gamma)
BB454ONE002364	6	PF07074.5	5.8e-48	162.3	TRAP-gamma	Translocon-associated protein, gamma subunit (TRAP-gamma)
BB454ONE002367	5	PF00642.17	1.4e-07	30.6	zf-CCCH	Zinc finger C-x8-C-x5-C-x3-H type (and similar)
BB454ONE002367	5	PF00076.15	2.9e-06	26.4	RRM_1	RNA recognition motif. (a.k.a. RRM, RBD, or RNP domain)
BB454ONE002369	4	PF04062.7	1.4e-73	246	P21-Arc	ARP2/3 complex ARPC3 (21 kDa) subunit
BB454ONE002370	1	PF00118.17	2.7e-43	148	Cpn60_TCP1	TCP-1/cpn60 chaperonin family
BB454ONE002370	2	PF00118.17	6.1e-37	127	Cpn60_TCP1	TCP-1/cpn60 chaperonin family
BB454ONE002370	3	PF00118.17	5.2e-11	41.5	Cpn60_TCP1	TCP-1/cpn60 chaperonin family
BB454ONE002372	5	PF00106.18	3.9e-06	26.5	adh_short	short chain dehydrogenase
BB454ONE002376	3	PF00155.14	5.5e-20	71.3	Aminotran_1_2	Aminotransferase class I and II
BB454ONE002378	2	PF00089.19	2.5e-15	56.3	Trypsin	Trypsin
BB454ONE002379	6	PF03966.9	1.1e-15	57.3	Trm112p	Trm112p-like protein
BB454ONE002380	5	PF01428.9	1.1e-11	44	zf-AN1	AN1-like Zinc finger
BB454ONE002380	5	PF01754.9	2.7e-11	42.4	zf-A20	A20-like zinc finger
BB454ONE002381	2	PF00583.17	1.9e-10	40.3	Acetyltransf_1	Acetyltransferase (GNAT) family
BB454ONE002382	1	PF05821.4	2.2e-44	150.9	NDUF_B8	NADH-ubiquinone oxidoreductase ASHI subunit (CI-ASHI or NDUFB8)
BB454ONE002383	3	PF00227.19	1e-44	151.8	Proteasome	Proteasome subunit
BB454ONE002385	4	PF00108.16	6.6e-25	87.2	Thiolase_N	Thiolase, N-terminal domain
BB454ONE002389	3	PF01266.17	1.1e-15	57	DAO	FAD dependent oxidoreductase
BB454ONE002390	6	PF00307.24	4.4e-18	64.9	CH	Calponin homology (CH) domain
BB454ONE002392	6	PF00155.14	7.2e-15	54.4	Aminotran_1_2	Aminotransferase class I and II
BB454ONE002396	4	PF00347.16	3.3e-17	62.4	Ribosomal_L6	Ribosomal protein L6
BB454ONE002397	6	PF03392.6	6e-24	83.5	OS-D	Insect pheromone-binding family, A10/OS-D
BB454ONE002399	2	PF04571.7	1.4e-44	149.9	Lipin_N	lipin, N-terminal conserved region
BB454ONE002403	3	PF01058.15	3.5e-23	81.3	Oxidored_q6	NADH ubiquinone oxidoreductase, 20 Kd subunit
BB454ONE002404	6	PF09457.3	3.8e-08	32.6	RBD-FIP	FIP domain
BB454ONE002405	6	PF00227.19	5.9e-57	191.7	Proteasome	Proteasome subunit
BB454ONE002405	6	PF10584.2	4.1e-14	51.2	Proteasome_A_N	Proteasome subunit A N-terminal signature
BB454ONE002406	1	PF00137.14	1.2e-16	60	ATP-synt_C	ATP synthase subunit C
BB454ONE002407	5	PF00261.13	1.7e-50	171	Tropomyosin	Tropomyosin
BB454ONE002408	5	PF00106.18	3e-08	33.4	adh_short	short chain dehydrogenase
BB454ONE002409	5	PF00293.21	9.8e-11	41.1	NUDIX	NUDIX domain
BB454ONE002411	6	PF00010.19	6.2e-07	28.7	HLH	Helix-loop-helix DNA-binding domain
BB454ONE002412	3	PF00071.15	6.9e-32	109.7	Ras	Ras family
BB454ONE002412	3	PF08477.6	5.4e-10	39.4	Miro	Miro-like protein
BB454ONE002412	3	PF00025.14	9.1e-09	34.4	Arf	ADP-ribosylation factor family
BB454ONE002413	4	PF02792.7	5.7e-80	265.7	Mago_nashi	Mago nashi protein
BB454ONE002415	4	PF00375.11	6.6e-70	235.5	SDF	Sodium:dicarboxylate symporter family
BB454ONE002416	1	PF04718.8	2.5e-24	85.5	ATP-synt_G	Mitochondrial ATP synthase g subunit
BB454ONE002417	6	PF04427.11	4.2e-28	98	Brix	Brix domain
BB454ONE002419	3	PF00215.17	2.1e-32	112	OMPdecase	Orotidine 5'-phosphate decarboxylase / HUMPS family
BB454ONE002420	2	PF05676.6	1.6e-25	87.9	NDUF_B7	NADH-ubiquinone oxidoreductase B18 subunit (NDUFB7)
BB454ONE002420	6	PF00107.19	2.2e-20	72.2	ADH_zinc_N	Zinc-binding dehydrogenase
BB454ONE002421	3	PF10276.2	9.8e-17	60.2	zf-CHCC	Zinc-finger domain
BB454ONE002422	5	PF01607.17	3.6e-10	39.3	CBM_14	Chitin binding Peritrophin-A domain
BB454ONE002422	5	PF01522.14	8.8e-10	37.9	Polysacc_deac_1	Polysaccharide deacetylase
BB454ONE002422	5	PF00057.11	3.4e-08	32.9	Ldl_recept_a	Low-density lipoprotein receptor domain class A
BB454ONE002426	6	PF10244.2	4.1e-29	100.1	MRP-L51	Mitochondrial ribosomal subunit
BB454ONE002427	6	PF00171.15	1.5e-35	122.1	Aldedh	Aldehyde dehydrogenase family
BB454ONE002429	2	PF04117.5	1.7e-20	72.1	Mpv17_PMP22	Mpv17 / PMP22 family
BB454ONE002430	5	PF00149.21	7.3e-15	54.5	Metallophos	Calcineurin-like phosphoesterase
BB454ONE002432	6	PF02996.10	1.5e-18	66.2	Prefoldin	Prefoldin subunit
BB454ONE002433	3	PF01048.13	2.4e-46	157.3	PNP_UDP_1	Phosphorylase superfamily
BB454ONE002435	2	PF00370.14	1.1e-32	113	FGGY_N	FGGY family of carbohydrate kinases, N-terminal domain
BB454ONE002435	2	PF02782.9	6.3e-10	38.7	FGGY_C	FGGY family of carbohydrate kinases, C-terminal domain
BB454ONE002437	5	PF00285.14	6.6e-10	37.9	Citrate_synt	Citrate synthase
BB454ONE002438	3	PF01209.11	1.9e-63	213.4	Ubie_methyltran	ubiE/COQ5 methyltransferase family
BB454ONE002438	3	PF08241.5	1.1e-14	54.3	Methyltransf_11	Methyltransferase domain
BB454ONE002439	1	PF09769.2	1.1e-15	57.3	ApoO	Apolipoprotein O
BB454ONE002440	2	PF11976.1	1.1e-07	31.1	Rad60-SLD	Ubiquitin-2 like Rad60 SUMO-like
BB454ONE002441	2	PF00009.20	5.9e-39	133.1	GTP_EFTU	Elongation factor Tu GTP binding domain
BB454ONE002443	2	PF05915.5	2e-23	82.1	DUF872	Eukaryotic protein of unknown function (DUF872)
BB454ONE002445	4	PF07942.5	6.1e-29	100.5	N2227	N2227-like protein
BB454ONE002445	6	PF07942.5	4.1e-58	196.1	N2227	N2227-like protein
BB454ONE002447	5	PF00005.20	6.5e-15	55.2	ABC_tran	ABC transporter
BB454ONE002448	4	PF04667.10	9.4e-13	47.6	Endosulfine	cAMP-regulated phosphoprotein/endosulfine conserved region
BB454ONE002449	1	PF02866.11	2.5e-19	69.3	Ldh_1_C	lactate/malate dehydrogenase, alpha/beta C-terminal domain
BB454ONE002449	3	PF00056.16	3.1e-37	127.1	Ldh_1_N	lactate/malate dehydrogenase, NAD binding domain
BB454ONE002450	3	PF01564.10	5.8e-22	77.5	Spermine_synth	Spermine/spermidine synthase
BB454ONE002450	5	PF00171.15	1.1e-77	260.9	Aldedh	Aldehyde dehydrogenase family
BB454ONE002451	6	PF05670.6	5.9e-23	80.2	DUF814	Domain of unknown function (DUF814)
BB454ONE002455	2	PF01496.12	5.8e-40	136.5	V_ATPase_I	V-type ATPase 116kDa subunit family
BB454ONE002457	4	PF00071.15	5.2e-18	64.6	Ras	Ras family
BB454ONE002457	4	PF08477.6	9.2e-11	41.9	Miro	Miro-like protein
BB454ONE002457	4	PF00025.14	1.9e-08	33.4	Arf	ADP-ribosylation factor family
BB454ONE002457	4	PF04670.5	3.5e-07	29.3	Gtr1_RagA	Gtr1/RagA G protein conserved region
BB454ONE002458	2	PF07993.5	6.4e-11	41.3	NAD_binding_4	Male sterility protein
BB454ONE002458	3	PF07993.5	6.1e-50	169.1	NAD_binding_4	Male sterility protein
BB454ONE002458	3	PF03015.12	1.2e-18	66.8	Sterile	Male sterility protein
BB454ONE002459	6	PF00240.16	8.3e-16	56.7	ubiquitin	Ubiquitin family
BB454ONE002459	6	PF11976.1	6e-08	31.9	Rad60-SLD	Ubiquitin-2 like Rad60 SUMO-like
BB454ONE002460	1	PF00026.16	4.1e-24	85.1	Asp	Eukaryotic aspartyl protease
BB454ONE002465	4	PF00188.19	1.9e-23	82.9	CAP	Cysteine-rich secretory protein family
BB454ONE002466	5	PF00307.24	3.7e-13	49.1	CH	Calponin homology (CH) domain
BB454ONE002466	5	PF00402.11	1.7e-07	30.1	Calponin	Calponin family repeat
BB454ONE002467	4	PF00335.13	5.1e-41	140	Tetraspannin	Tetraspanin family
BB454ONE002468	5	PF07890.5	6.8e-24	84	Rrp15p	Rrp15p
BB454ONE002469	1	PF00089.19	8.4e-10	38.3	Trypsin	Trypsin
BB454ONE002469	2	PF00089.19	1.4e-21	76.8	Trypsin	Trypsin
BB454ONE002470	6	PF10660.2	1.1e-23	82.5	MitoNEET_N	Iron-containing outer mitochondrial membrane protein N-terminus
BB454ONE002470	6	PF09360.3	4.5e-11	42	zf-CDGSH	Iron-binding zinc finger CDGSH type
BB454ONE002472	3	PF00241.13	1.1e-13	50.8	Cofilin_ADF	Cofilin/tropomyosin-type actin-binding protein
BB454ONE002473	1	PF04750.7	2.5e-50	170.1	Far-17a_AIG1	FAR-17a/AIG1-like protein
BB454ONE002474	2	PF02958.13	1.2e-16	60.3	DUF227	Domain of unknown function (DUF227)
BB454ONE002475	5	PF04201.8	1.2e-28	99.5	TPD52	Tumour protein D52 family
BB454ONE002477	5	PF01227.15	7.1e-38	127.8	GTP_cyclohydroI	GTP cyclohydrolase I
BB454ONE002479	4	PF00701.15	1.1e-46	158.5	DHDPS	Dihydrodipicolinate synthetase family
BB454ONE002480	1	PF01158.11	3.2e-39	132.5	Ribosomal_L36e	Ribosomal protein L36e
BB454ONE002481	4	PF00241.13	3.2e-13	49.3	Cofilin_ADF	Cofilin/tropomyosin-type actin-binding protein
BB454ONE002483	3	PF00578.14	3.9e-15	55.3	AhpC-TSA	AhpC/TSA family
BB454ONE002485	6	PF00071.15	8.2e-54	181	Ras	Ras family
BB454ONE002485	6	PF08477.6	1.5e-15	57.4	Miro	Miro-like protein
BB454ONE002485	6	PF00025.14	7.5e-09	34.7	Arf	ADP-ribosylation factor family
BB454ONE002487	6	PF00079.13	9.1e-40	136.7	Serpin	Serpin (serine protease inhibitor)
BB454ONE002488	3	PF03914.10	2e-34	118	CBF	CBF/Mak21 family
BB454ONE002490	5	PF01395.15	3.9e-15	55.2	PBP_GOBP	PBP/GOBP family
BB454ONE002491	6	PF01592.9	2.3e-54	182.3	NifU_N	NifU-like N terminal domain
BB454ONE002492	4	PF00271.24	9.6e-30	101.9	Helicase_C	Helicase conserved C-terminal domain
BB454ONE002493	1	PF07946.7	9.3e-48	162.4	DUF1682	Protein of unknown function (DUF1682)
BB454ONE002495	5	PF00206.13	2.5e-22	79.1	Lyase_1	Lyase
BB454ONE002495	5	PF10397.2	5.1e-15	54.9	ADSL_C	Adenylosuccinate lyase C-terminus
BB454ONE002498	3	PF02990.9	2.3e-25	88.7	EMP70	Endomembrane protein 70
BB454ONE002499	3	PF01912.11	8.7e-84	279.2	eIF-6	eIF-6 family
BB454ONE002500	3	PF00651.24	7.6e-22	77.1	BTB	BTB/POZ domain
BB454ONE002503	3	PF00010.19	5.9e-06	25.5	HLH	Helix-loop-helix DNA-binding domain
BB454ONE002505	2	PF05154.9	2.3e-08	33.8	TM2	TM2 domain
BB454ONE002506	2	PF02036.10	2.6e-23	81.9	SCP2	SCP-2 sterol transfer family
BB454ONE002506	2	PF02803.11	1.3e-09	37.1	Thiolase_C	Thiolase, C-terminal domain
BB454ONE002507	3	PF03946.7	2.2e-16	58.7	Ribosomal_L11_N	Ribosomal protein L11, N-terminal domain
BB454ONE002507	3	PF00298.12	3.2e-10	39.6	Ribosomal_L11	Ribosomal protein L11, RNA binding domain
BB454ONE002510	4	PF06229.5	8.3e-46	155.6	FRG1	FRG1-like family
BB454ONE002511	6	PF02958.13	4.4e-20	71.7	DUF227	Domain of unknown function (DUF227)
BB454ONE002511	6	PF07914.4	8.9e-14	50.5	DUF1679	Protein of unknown function (DUF1679)
BB454ONE002511	6	PF01636.16	4.3e-09	36.1	APH	Phosphotransferase enzyme family
BB454ONE002512	5	PF09358.3	1.2e-48	164.1	UBA_e1_C	Ubiquitin-activating enzyme e1 C-terminal domain
BB454ONE002512	5	PF02134.14	1.2e-27	94.9	UBACT	Repeat in ubiquitin-activating (UBA) protein
BB454ONE002513	2	PF03820.10	2.3e-10	39.2	Mtc	Tricarboxylate carrier
BB454ONE002516	5	PF09801.2	2.5e-46	156.9	SYS1	Integral membrane protein S linking to the trans Golgi network
BB454ONE002517	2	PF04628.6	1.8e-31	108.3	Sedlin_N	Sedlin, N-terminal conserved region
BB454ONE002517	2	PF04099.5	2.4e-11	43.2	Sybindin	Sybindin-like family
BB454ONE002518	4	PF08390.4	1.7e-19	68.7	TRAM1	TRAM1-like protein
BB454ONE002518	4	PF03798.9	6.4e-06	25.5	TRAM_LAG1_CLN8	TLC domain
BB454ONE002519	3	PF00036.25	3e-06	25.8	efhand	EF hand
BB454ONE002521	3	PF07851.6	9.2e-91	304	TMPIT	TMPIT-like protein
BB454ONE002523	4	PF00857.13	2.2e-14	53.4	Isochorismatase	Isochorismatase family
BB454ONE002524	5	PF00266.12	5.1e-55	186.3	Aminotran_5	Aminotransferase class-V
BB454ONE002525	2	PF00071.15	2.1e-54	182.9	Ras	Ras family
BB454ONE002525	2	PF08477.6	1.1e-19	70.8	Miro	Miro-like protein
BB454ONE002525	2	PF00025.14	3.9e-10	38.9	Arf	ADP-ribosylation factor family
BB454ONE002527	2	PF07464.4	4.7e-16	58.6	ApoLp-III	Apolipophorin-III precursor (apoLp-III)
BB454ONE002529	6	PF07850.7	2.3e-23	82	Renin_r	Renin receptor-like protein
BB454ONE002531	1	PF04379.7	6.5e-09	35.3	DUF525	Protein of unknown function (DUF525)
BB454ONE002531	3	PF04379.7	4.3e-12	45.5	DUF525	Protein of unknown function (DUF525)
BB454ONE002533	5	PF00578.14	2.4e-30	104.4	AhpC-TSA	AhpC/TSA family
BB454ONE002533	5	PF08534.3	5e-14	51.7	Redoxin	Redoxin
BB454ONE002533	5	PF10417.2	4.4e-11	41.9	1-cysPrx_C	C-terminal domain of 1-Cys peroxiredoxin
BB454ONE002534	6	PF10200.2	4.4e-08	32.6	Ndufs5	NADH:ubiquinone oxidoreductase, NDUFS5-15kDa
BB454ONE002535	4	PF02629.12	1.4e-08	34.8	CoA_binding	CoA binding domain
BB454ONE002535	6	PF00549.12	6.6e-22	77.4	Ligase_CoA	CoA-ligase
BB454ONE002535	6	PF02629.12	2.4e-13	50	CoA_binding	CoA binding domain
BB454ONE002538	4	PF03022.9	6.7e-07	28.4	MRJP	Major royal jelly protein
BB454ONE002540	4	PF00344.13	1.7e-30	105.8	SecY	eubacterial secY protein
BB454ONE002541	6	PF00828.12	2.7e-06	27.4	Ribosomal_L18e	Ribosomal protein L18e/L15
BB454ONE002542	1	PF01694.15	9.1e-08	31.9	Rhomboid	Rhomboid family
BB454ONE002542	2	PF01694.15	2.5e-06	27.2	Rhomboid	Rhomboid family
BB454ONE002543	5	PF05680.5	9.5e-14	50.7	ATP-synt_E	ATP synthase E chain
BB454ONE002547	5	PF08704.3	5e-42	143.7	GCD14	tRNA methyltransferase complex GCD14 subunit
BB454ONE002548	6	PF06624.5	7.2e-35	117.9	RAMP4	Ribosome associated membrane protein RAMP4
BB454ONE002551	2	PF06374.4	6.5e-15	54.8	NDUF_C2	NADH-ubiquinone oxidoreductase subunit b14.5b (NDUFC2)
BB454ONE002552	6	PF01191.12	8.8e-34	114.6	RNA_pol_Rpb5_C	RNA polymerase Rpb5, C-terminal domain
BB454ONE002552	6	PF03871.7	1.2e-31	108.6	RNA_pol_Rpb5_N	RNA polymerase Rpb5, N-terminal domain
BB454ONE002553	5	PF00310.14	7.1e-14	50.9	GATase_2	Glutamine amidotransferases class-II
BB454ONE002553	6	PF00310.14	3e-06	25.8	GATase_2	Glutamine amidotransferases class-II
BB454ONE002555	3	PF00071.15	4e-37	126.8	Ras	Ras family
BB454ONE002555	3	PF08477.6	2.5e-06	27.6	Miro	Miro-like protein
BB454ONE002556	4	PF00151.12	1.9e-44	151.9	Lipase	Lipase
BB454ONE002557	1	PF00009.20	3.9e-55	185.9	GTP_EFTU	Elongation factor Tu GTP binding domain
BB454ONE002557	1	PF03143.10	4.4e-34	116.5	GTP_EFTU_D3	Elongation factor Tu C-terminal domain
BB454ONE002557	1	PF03144.18	6.6e-17	61	GTP_EFTU_D2	Elongation factor Tu domain 2
BB454ONE002558	6	PF07679.9	8.9e-18	63.6	I-set	Immunoglobulin I-set domain
BB454ONE002558	6	PF00047.18	3.3e-06	26.8	ig	Immunoglobulin domain
BB454ONE002559	6	PF00887.12	1.1e-28	98.3	ACBP	Acyl CoA binding protein
BB454ONE002561	4	PF10185.2	6.1e-68	227.1	Mesd	Chaperone for wingless signalling and trafficking of LDL receptor
BB454ONE002564	5	PF00271.24	2.4e-20	71.8	Helicase_C	Helicase conserved C-terminal domain
BB454ONE002567	2	PF00397.19	6.2e-07	28.8	WW	WW domain
BB454ONE002568	4	PF06585.4	9.3e-61	204.4	JHBP	Haemolymph juvenile hormone binding protein (JHBP)
BB454ONE002569	4	PF01163.15	4.9e-58	195.2	RIO1	RIO1 family
BB454ONE002570	1	PF09731.2	1.3e-11	43.6	Mitofilin	Mitochondrial inner membrane protein
BB454ONE002570	3	PF09731.2	5.6e-07	28.3	Mitofilin	Mitochondrial inner membrane protein
BB454ONE002572	5	PF00023.23	7.9e-06	25.1	Ank	Ankyrin repeat
BB454ONE002573	4	PF00412.15	3.1e-13	49.2	LIM	LIM domain
BB454ONE002574	1	PF00067.15	5.3e-67	226	p450	Cytochrome P450
BB454ONE002576	6	PF00226.24	2.1e-29	100.7	DnaJ	DnaJ domain
BB454ONE002578	5	PF00085.13	4.6e-31	106.2	Thioredoxin	Thioredoxin
BB454ONE002579	5	PF03650.6	3.6e-37	126.6	UPF0041	Uncharacterised protein family (UPF0041)
BB454ONE002583	1	PF04117.5	7.3e-22	76.4	Mpv17_PMP22	Mpv17 / PMP22 family
BB454ONE002584	4	PF00004.22	3.6e-11	43.1	AAA	ATPase family associated with various cellular activities (AAA)
BB454ONE002585	4	PF00071.15	3.6e-27	94.4	Ras	Ras family
BB454ONE002586	1	PF08231.5	2.3e-23	82.7	SYF2	SYF2 splicing factor
BB454ONE002588	4	PF00412.15	2e-11	43.4	LIM	LIM domain
BB454ONE002589	5	PF00459.18	6e-09	35.2	Inositol_P	Inositol monophosphatase family
BB454ONE002589	6	PF00459.18	1.2e-30	106.3	Inositol_P	Inositol monophosphatase family
BB454ONE002590	4	PF10163.2	1.8e-18	65.9	EnY2	Transcription factor e(y)2
BB454ONE002591	3	PF11581.1	2.8e-45	153.1	Argos	Antagonist of EGFR signalling, Argos
BB454ONE002593	4	PF02291.8	3.9e-48	162.1	TFIID-31kDa	Transcription initiation factor IID, 31kD subunit
BB454ONE002594	2	PF00883.14	4.6e-35	120.6	Peptidase_M17	Cytosol aminopeptidase family, catalytic domain
BB454ONE002595	4	PF03311.7	7.3e-47	158.3	Cornichon	Cornichon protein
BB454ONE002596	5	PF01199.11	1.6e-37	127.2	Ribosomal_L34e	Ribosomal protein L34e
BB454ONE002597	5	PF04652.9	4.5e-55	187.2	DUF605	Vta1 like
BB454ONE002598	5	PF00443.22	6e-38	130.1	UCH	Ubiquitin carboxyl-terminal hydrolase
BB454ONE002602	1	PF00578.14	1.7e-35	121	AhpC-TSA	AhpC/TSA family
BB454ONE002602	1	PF08534.3	6e-13	48.2	Redoxin	Redoxin
BB454ONE002602	1	PF10417.2	7.4e-11	41.2	1-cysPrx_C	C-terminal domain of 1-Cys peroxiredoxin
BB454ONE002604	1	PF00085.13	2.7e-27	94.1	Thioredoxin	Thioredoxin
BB454ONE002606	2	PF11027.1	2.5e-31	107.3	DUF2615	Protein of unknown function (DUF2615)
BB454ONE002607	5	PF10695.2	3.6e-10	39.3	Cw-hydrolase	Cell wall-associated hydrolase
BB454ONE002608	3	PF10075.2	4.8e-26	90.9	PCI_Csn8	COP9 signalosome, subunit CSN8
BB454ONE002608	3	PF03399.9	1.5e-20	73.2	SAC3_GANP	SAC3/GANP/Nin1/mts3/eIF-3 p25 family
BB454ONE002609	3	PF09809.2	4.7e-30	103.1	MRP-L27	Mitochondrial ribosomal protein L27
BB454ONE002610	4	PF09542.3	3.9e-18	64.8	FFD_TFG	FFD and TFG box motifs
BB454ONE002611	4	PF00112.16	1.3e-67	227.5	Peptidase_C1	Papain family cysteine protease
BB454ONE002611	4	PF08246.5	3.8e-11	42.7	Inhibitor_I29	Cathepsin propeptide inhibitor domain (I29)
BB454ONE002611	6	PF00112.16	1.1e-15	57.8	Peptidase_C1	Papain family cysteine protease
BB454ONE002612	5	PF03392.6	4.2e-13	48.7	OS-D	Insect pheromone-binding family, A10/OS-D
BB454ONE002613	2	PF03931.8	7.8e-21	73.5	Skp1_POZ	Skp1 family, tetramerisation domain
BB454ONE002615	4	PF07304.4	9.2e-18	64.1	SRA1	Steroid receptor RNA activator (SRA1)
BB454ONE002616	5	PF00160.14	1.8e-44	151.3	Pro_isomerase	Cyclophilin type peptidyl-prolyl cis-trans isomerase/CLD
BB454ONE002618	3	PF08547.5	3.6e-07	29.8	CIA30	Complex I intermediate-associated protein 30 (CIA30)
BB454ONE002619	5	PF11705.1	1.9e-13	50.5	RNA_pol_3_Rpc31	DNA-directed RNA polymerase III subunit Rpc31
BB454ONE002622	6	PF00106.18	1.8e-06	27.6	adh_short	short chain dehydrogenase
BB454ONE002623	3	PF00097.18	6.7e-08	31.9	zf-C3HC4	Zinc finger, C3HC4 type (RING finger)
BB454ONE002625	1	PF00316.13	4.8e-127	422.9	FBPase	Fructose-1-6-bisphosphatase
BB454ONE002627	1	PF00112.16	2.8e-47	161.1	Peptidase_C1	Papain family cysteine protease
BB454ONE002628	2	PF00160.14	4.1e-50	169.6	Pro_isomerase	Cyclophilin type peptidyl-prolyl cis-trans isomerase/CLD
BB454ONE002629	4	PF03392.6	1.4e-21	75.9	OS-D	Insect pheromone-binding family, A10/OS-D
BB454ONE002630	5	PF00137.14	3.1e-14	52.3	ATP-synt_C	ATP synthase subunit C
BB454ONE002631	1	PF00071.15	1.1e-57	193.6	Ras	Ras family
BB454ONE002631	1	PF08477.6	4.6e-16	59	Miro	Miro-like protein
BB454ONE002631	1	PF00025.14	3.8e-09	35.7	Arf	ADP-ribosylation factor family
BB454ONE002632	3	PF00085.13	5.7e-07	28.8	Thioredoxin	Thioredoxin
BB454ONE002634	1	PF02779.17	1e-42	145.3	Transket_pyr	Transketolase, pyrimidine binding domain
BB454ONE002636	1	PF07347.5	7.2e-30	102.3	CI-B14_5a	NADH:ubiquinone oxidoreductase subunit B14.5a (Complex I-B14.5a)
BB454ONE002639	1	PF01088.14	3.6e-69	231.9	Peptidase_C12	Ubiquitin carboxyl-terminal hydrolase, family 1
BB454ONE002640	2	PF03949.8	2.8e-32	111.9	Malic_M	Malic enzyme, NAD binding domain
BB454ONE002641	2	PF00782.13	3.4e-14	52.2	DSPc	Dual specificity phosphatase, catalytic domain
BB454ONE002643	5	PF01221.11	6.8e-44	147.4	Dynein_light	Dynein light chain type 1
BB454ONE002644	2	PF00549.12	4.3e-25	87.7	Ligase_CoA	CoA-ligase
BB454ONE002645	6	PF01607.17	6.1e-12	44.9	CBM_14	Chitin binding Peritrophin-A domain
BB454ONE002647	3	PF11901.1	1.3e-42	143.9	DUF3421	Protein of unknown function (DUF3421)
BB454ONE002648	2	PF04969.9	1.3e-15	57.4	CS	CS domain
BB454ONE002649	5	PF03193.9	2.8e-07	29.5	DUF258	Protein of unknown function, DUF258
BB454ONE002651	1	PF06093.6	1.3e-30	104.7	Spt4	Spt4/RpoE2 zinc finger
BB454ONE002652	6	PF07714.10	1.7e-58	197.4	Pkinase_Tyr	Protein tyrosine kinase
BB454ONE002652	6	PF00069.18	1.1e-26	93.3	Pkinase	Protein kinase domain
BB454ONE002653	2	PF03345.7	2.8e-51	173.9	DDOST_48kD	Oligosaccharyltransferase 48 kDa subunit beta
BB454ONE002655	2	PF00474.10	3.4e-38	131	SSF	Sodium:solute symporter family
BB454ONE002659	3	PF04935.5	8.1e-36	123	SURF6	Surfeit locus protein 6
BB454ONE002659	5	PF07258.7	5.5e-11	42	HCaRG	HCaRG protein
BB454ONE002661	4	PF08519.5	3.1e-20	72.1	RFC1	Replication factor RFC1 C terminal domain
BB454ONE002668	4	PF02747.8	8.1e-64	212.9	PCNA_C	Proliferating cell nuclear antigen, C-terminal domain
BB454ONE002668	4	PF00705.11	1.1e-57	192.7	PCNA_N	Proliferating cell nuclear antigen, N-terminal domain
BB454ONE002668	4	PF04139.6	6.6e-07	28.3	Rad9	Rad9
BB454ONE002670	6	PF01728.12	1.1e-60	204.4	FtsJ	FtsJ-like methyltransferase
BB454ONE002672	4	PF04668.5	1.9e-49	166.9	Tsg	Twisted gastrulation (Tsg) protein conserved region
BB454ONE002673	1	PF04064.6	7.7e-20	69.9	DUF384	Domain of unknown function (DUF384)
BB454ONE002673	1	PF04063.7	2.9e-18	65.7	DUF383	Domain of unknown function (DUF383)
BB454ONE002674	6	PF01398.14	1.3e-20	72.9	Mov34	Mov34/MPN/PAD-1 family
BB454ONE002676	2	PF10601.2	2.4e-07	30.1	zf-LITAF-like	LITAF-like zinc ribbon domain
BB454ONE002676	3	PF10601.2	1.4e-08	34.1	zf-LITAF-like	LITAF-like zinc ribbon domain
BB454ONE002677	5	PF07830.6	1.4e-25	88.9	PP2C_C	Protein serine/threonine phosphatase 2C, C-terminal domain
BB454ONE002677	5	PF00481.14	2e-11	43.4	PP2C	Protein phosphatase 2C
BB454ONE002679	3	PF00534.13	1.7e-28	98.8	Glycos_transf_1	Glycosyl transferases group 1
BB454ONE002680	6	PF05964.7	7.3e-10	37.8	FYRN	F/Y-rich N-terminus
BB454ONE002681	6	PF05007.6	4.1e-39	134.4	Mannosyl_trans	Mannosyltransferase (PIG-M)
BB454ONE002682	4	PF00227.19	1.8e-07	30.3	Proteasome	Proteasome subunit
BB454ONE002682	5	PF00227.19	6.1e-18	64.4	Proteasome	Proteasome subunit
BB454ONE002684	2	PF00100.16	7e-06	25.4	Zona_pellucida	Zona pellucida-like domain
BB454ONE002685	1	PF00179.19	5.2e-45	151.9	UQ_con	Ubiquitin-conjugating enzyme
BB454ONE002686	2	PF00786.21	1.9e-09	37.5	PBD	P21-Rho-binding domain
BB454ONE002687	3	PF00149.21	8.7e-12	44.5	Metallophos	Calcineurin-like phosphoesterase
BB454ONE002688	6	PF00097.18	9.2e-06	25.1	zf-C3HC4	Zinc finger, C3HC4 type (RING finger)
BB454ONE002689	4	PF00245.13	3.6e-57	193.6	Alk_phosphatase	Alkaline phosphatase
BB454ONE002689	6	PF00245.13	2.5e-48	164.5	Alk_phosphatase	Alkaline phosphatase
BB454ONE002692	5	PF00071.15	6.3e-46	155.4	Ras	Ras family
BB454ONE002692	5	PF08477.6	1.1e-10	41.6	Miro	Miro-like protein
BB454ONE002694	4	PF00009.20	1.5e-37	128.5	GTP_EFTU	Elongation factor Tu GTP binding domain
BB454ONE002694	4	PF03143.10	2.3e-23	82.1	GTP_EFTU_D3	Elongation factor Tu C-terminal domain
BB454ONE002694	4	PF03144.18	2e-17	62.7	GTP_EFTU_D2	Elongation factor Tu domain 2
BB454ONE002696	4	PF04193.7	1.1e-12	46.9	PQ-loop	PQ loop repeat
BB454ONE002697	4	PF00085.13	1.3e-28	98.4	Thioredoxin	Thioredoxin
BB454ONE002700	2	PF04034.6	5.3e-55	184.1	DUF367	Domain of unknown function (DUF367)
BB454ONE002700	2	PF04068.8	1.3e-10	40.3	RLI	Possible metal-binding domain in RNase L inhibitor, RLI
BB454ONE002701	6	PF00248.14	2.7e-56	190.1	Aldo_ket_red	Aldo/keto reductase family
BB454ONE002702	2	PF00227.19	2.2e-61	206.1	Proteasome	Proteasome subunit
BB454ONE002702	2	PF10584.2	9.4e-14	50.1	Proteasome_A_N	Proteasome subunit A N-terminal signature
BB454ONE002703	6	PF07686.10	4.6e-12	45.5	V-set	Immunoglobulin V-set domain
BB454ONE002703	6	PF07679.9	4.3e-10	39	I-set	Immunoglobulin I-set domain
BB454ONE002704	3	PF00756.13	1.3e-58	198	Esterase	Putative esterase
BB454ONE002705	1	PF00227.19	6.1e-52	175.3	Proteasome	Proteasome subunit
BB454ONE002705	1	PF10584.2	1.4e-12	46.3	Proteasome_A_N	Proteasome subunit A N-terminal signature
BB454ONE002706	4	PF00635.19	3.1e-28	97.3	Motile_Sperm	MSP (Major sperm protein) domain
BB454ONE002707	2	PF09781.2	1.9e-64	216	NDUF_B5	NADH:ubiquinone oxidoreductase, NDUFB5/SGDH subunit
BB454ONE002708	1	PF00743.12	1.2e-13	49.8	FMO-like	Flavin-binding monooxygenase-like
BB454ONE002708	2	PF00743.12	3.5e-43	147.2	FMO-like	Flavin-binding monooxygenase-like
BB454ONE002708	2	PF07992.7	2.4e-09	36.7	Pyr_redox_2	Pyridine nucleotide-disulphide oxidoreductase
BB454ONE002709	3	PF01138.14	7.1e-13	48.7	RNase_PH	3' exoribonuclease family, domain 1
BB454ONE002710	2	PF00078.20	4.9e-06	25.7	RVT_1	Reverse transcriptase (RNA-dependent DNA polymerase)
BB454ONE002711	6	PF00227.19	2.2e-43	147.4	Proteasome	Proteasome subunit
BB454ONE002712	4	PF02866.11	2e-49	167.3	Ldh_1_C	lactate/malate dehydrogenase, alpha/beta C-terminal domain
BB454ONE002712	4	PF00056.16	2.8e-47	159.7	Ldh_1_N	lactate/malate dehydrogenase, NAD binding domain
BB454ONE002713	5	PF02469.15	1.7e-16	60.2	Fasciclin	Fasciclin domain
BB454ONE002715	6	PF00069.18	2.8e-59	200	Pkinase	Protein kinase domain
BB454ONE002715	6	PF07714.10	1.7e-28	99.1	Pkinase_Tyr	Protein tyrosine kinase
BB454ONE002716	6	PF00091.18	2.5e-62	210.2	Tubulin	Tubulin/FtsZ family, GTPase domain
BB454ONE002716	6	PF10644.2	8.4e-07	28.5	Misat_Myo_SegII	Misato Segment II myosin-like domain
BB454ONE002717	5	PF02862.10	6.1e-24	84.7	DDHD	DDHD domain
BB454ONE002719	5	PF11605.1	2.5e-18	65.3	Vps36_ESCRT-II	Vacuolar protein sorting protein 36 Vps36
BB454ONE002720	5	PF02535.15	1.3e-31	109.4	Zip	ZIP Zinc transporter
BB454ONE002721	6	PF00153.20	2.7e-19	68.3	Mito_carr	Mitochondrial carrier protein
BB454ONE002722	2	PF00069.18	1.1e-63	214.5	Pkinase	Protein kinase domain
BB454ONE002722	2	PF07714.10	5.4e-28	97.5	Pkinase_Tyr	Protein tyrosine kinase
BB454ONE002723	4	PF04893.10	5.4e-09	35.4	Yip1	Yip1 domain
BB454ONE002725	2	PF00621.13	5.8e-29	100.9	RhoGEF	RhoGEF domain
BB454ONE002726	1	PF01395.15	1.2e-09	37.5	PBP_GOBP	PBP/GOBP family
BB454ONE002728	6	PF01284.16	9.8e-09	34.8	MARVEL	Membrane-associating domain
BB454ONE002729	3	PF02852.15	8.3e-14	51.2	Pyr_redox_dim	Pyridine nucleotide-disulphide oxidoreductase, dimerisation domain
BB454ONE002730	1	PF01398.14	8.6e-18	63.8	Mov34	Mov34/MPN/PAD-1 family
BB454ONE002731	4	PF01012.14	1.7e-39	134.8	ETF	Electron transfer flavoprotein domain
BB454ONE002733	1	PF02114.9	6.9e-42	142.6	Phosducin	Phosducin
BB454ONE002733	1	PF00085.13	5.5e-07	28.9	Thioredoxin	Thioredoxin
BB454ONE002734	1	PF00191.13	1.3e-23	82.3	Annexin	Annexin
BB454ONE002735	6	PF02847.10	3.5e-22	77.9	MA3	MA3 domain
BB454ONE002737	4	PF00719.12	3e-32	110.8	Pyrophosphatase	Inorganic pyrophosphatase
BB454ONE002738	4	PF04614.5	2.2e-18	66.4	Pex19	Pex19 protein family
BB454ONE002739	2	PF00026.16	8.6e-27	93.9	Asp	Eukaryotic aspartyl protease
BB454ONE002740	5	PF02221.8	3.5e-29	101.3	E1_DerP2_DerF2	ML domain
BB454ONE002741	1	PF00313.15	1.8e-07	30.4	CSD	'Cold-shock' DNA-binding domain
BB454ONE002742	1	PF02230.9	6.3e-34	117	Abhydrolase_2	Phospholipase/Carboxylesterase
BB454ONE002745	3	PF00685.20	2.9e-08	33.1	Sulfotransfer_1	Sulfotransferase domain
BB454ONE002745	5	PF01926.16	4.4e-15	55	MMR_HSR1	GTPase of unknown function
BB454ONE002745	5	PF08477.6	1.2e-09	38.3	Miro	Miro-like protein
BB454ONE002745	5	PF00350.16	5e-06	26	Dynamin_N	Dynamin family
BB454ONE002745	5	PF00009.20	9.5e-06	24.8	GTP_EFTU	Elongation factor Tu GTP binding domain
BB454ONE002745	5	PF02421.11	1.4e-07	30.6	FeoB_N	Ferrous iron transport protein B
BB454ONE002746	3	PF00089.19	6.5e-53	179.2	Trypsin	Trypsin
BB454ONE002747	2	PF00076.15	1.9e-14	52.7	RRM_1	RNA recognition motif. (a.k.a. RRM, RBD, or RNP domain)
BB454ONE002748	4	PF00179.19	4.6e-15	54.9	UQ_con	Ubiquitin-conjugating enzyme
BB454ONE002749	5	PF00675.13	8.3e-57	190.8	Peptidase_M16	Insulinase (Peptidase family M16)
BB454ONE002749	5	PF05193.14	1.4e-36	125.5	Peptidase_M16_C	Peptidase M16 inactive domain
BB454ONE002750	4	PF00406.15	4.4e-42	143.1	ADK	Adenylate kinase
BB454ONE002750	4	PF06414.5	3.8e-08	32.3	Zeta_toxin	Zeta toxin
BB454ONE002752	5	PF01699.17	7.2e-20	70.7	Na_Ca_ex	Sodium/calcium exchanger protein
BB454ONE002753	4	PF07479.7	4e-14	52.2	NAD_Gly3P_dh_C	NAD-dependent glycerol-3-phosphate dehydrogenase C-terminus
BB454ONE002754	6	PF00120.17	3.2e-63	212.9	Gln-synt_C	Glutamine synthetase, catalytic domain
BB454ONE002754	6	PF03951.12	3.5e-17	61.4	Gln-synt_N	Glutamine synthetase, beta-Grasp domain
BB454ONE002755	6	PF00379.16	5e-10	39.1	Chitin_bind_4	Insect cuticle protein
BB454ONE002756	3	PF03099.12	9.4e-17	60.8	BPL_LplA_LipB	Biotin/lipoate A/B protein ligase family
BB454ONE002757	4	PF00782.13	1.7e-19	69.3	DSPc	Dual specificity phosphatase, catalytic domain
BB454ONE002758	3	PF06325.6	1.2e-08	34.1	PrmA	Ribosomal protein L11 methyltransferase (PrmA)
BB454ONE002758	3	PF08241.5	2.5e-06	27.5	Methyltransf_11	Methyltransferase domain
BB454ONE002760	6	PF00567.17	4.2e-25	87.6	TUDOR	Tudor domain
BB454ONE002761	4	PF05827.5	5.4e-15	55.1	ATP-synt_S1	Vacuolar ATP synthase subunit S1 (ATP6S1)
BB454ONE002762	6	PF01399.20	2.9e-09	36.8	PCI	PCI domain
BB454ONE002763	3	PF10271.2	2.2e-45	154.7	Tmp39	Putative transmembrane protein
BB454ONE002766	3	PF03129.13	2e-22	78.6	HGTP_anticodon	Anticodon binding domain
BB454ONE002768	6	PF00743.12	9.7e-47	159	FMO-like	Flavin-binding monooxygenase-like
BB454ONE002768	6	PF07992.7	1.4e-07	30.9	Pyr_redox_2	Pyridine nucleotide-disulphide oxidoreductase
BB454ONE002769	6	PF01048.13	6.5e-08	31.5	PNP_UDP_1	Phosphorylase superfamily
BB454ONE002770	5	PF07679.9	2.8e-13	49.2	I-set	Immunoglobulin I-set domain
BB454ONE002771	4	PF01412.11	9.7e-33	112.1	ArfGap	Putative GTPase activating protein for Arf
BB454ONE002772	4	PF02936.7	2.8e-44	149.9	COX4	Cytochrome c oxidase subunit IV
BB454ONE002774	5	PF11788.1	9.5e-09	35.6	MRP-L46	39S mitochondrial ribosomal protein L46
BB454ONE002775	4	PF01619.11	1.6e-91	306.4	Pro_dh	Proline dehydrogenase
BB454ONE002776	5	PF00025.14	1.1e-62	210	Arf	ADP-ribosylation factor family
BB454ONE002776	5	PF00503.13	3.1e-06	26.1	G-alpha	G-protein alpha subunit
BB454ONE002776	5	PF09439.3	9.6e-07	27.8	SRPRB	Signal recognition particle receptor beta subunit
BB454ONE002776	5	PF08477.6	6.2e-06	26.3	Miro	Miro-like protein
BB454ONE002777	1	PF00067.15	3.2e-33	114.6	p450	Cytochrome P450
BB454ONE002778	3	PF07086.5	1.7e-50	170.9	DUF1352	Protein of unknown function (DUF1352)
BB454ONE002779	6	PF00472.13	6.4e-18	64.3	RF-1	RF-1 domain
BB454ONE002780	6	PF09412.3	3.3e-38	130.7	XendoU	Endoribonuclease XendoU
BB454ONE002781	4	PF00443.22	1.8e-76	256.5	UCH	Ubiquitin carboxyl-terminal hydrolase
BB454ONE002782	3	PF01990.10	9.1e-30	102.6	ATP-synt_F	ATP synthase (F/14-kDa) subunit
BB454ONE002783	3	PF00379.16	3.4e-15	55.7	Chitin_bind_4	Insect cuticle protein
BB454ONE002784	6	PF01569.14	3.1e-24	84.7	PAP2	PAP2 superfamily
BB454ONE002785	3	PF05404.5	6.8e-62	207.5	TRAP-delta	Translocon-associated protein, delta subunit precursor (TRAP-delta)
BB454ONE002786	5	PF01436.14	9.9e-06	24.9	NHL	NHL repeat
BB454ONE002787	4	PF08510.5	1.3e-16	60	PIG-P	PIG-P
BB454ONE002787	6	PF09341.3	3.8e-22	77.7	Pcc1	Transcription factor Pcc1
BB454ONE002788	1	PF00199.12	1.3e-54	185	Catalase	Catalase
BB454ONE002788	1	PF06628.5	1.1e-19	69.7	Catalase-rel	Catalase-related immune-responsive
BB454ONE002788	3	PF00199.12	5.5e-12	44.7	Catalase	Catalase
BB454ONE002789	5	PF01066.14	2.3e-17	62.8	CDP-OH_P_transf	CDP-alcohol phosphatidyltransferase
BB454ONE002790	2	PF06441.5	1.5e-33	114.7	EHN	Epoxide hydrolase N terminus
BB454ONE002790	2	PF00561.13	5.8e-06	25.6	Abhydrolase_1	alpha/beta hydrolase fold
BB454ONE002791	2	PF06585.4	6e-68	228	JHBP	Haemolymph juvenile hormone binding protein (JHBP)
BB454ONE002792	6	PF00241.13	4.9e-43	145.7	Cofilin_ADF	Cofilin/tropomyosin-type actin-binding protein
BB454ONE002794	2	PF00067.15	7e-17	60.7	p450	Cytochrome P450
BB454ONE002794	3	PF00067.15	1.3e-26	92.8	p450	Cytochrome P450
BB454ONE002795	5	PF00011.14	8.9e-18	63.7	HSP20	Hsp20/alpha crystallin family
BB454ONE002796	3	PF00125.17	6.8e-22	77.1	Histone	Core histone H2A/H2B/H3/H4
BB454ONE002798	3	PF01926.16	1.5e-10	40.4	MMR_HSR1	GTPase of unknown function
BB454ONE002799	5	PF00026.16	1.9e-99	332.6	Asp	Eukaryotic aspartyl protease
BB454ONE002800	6	PF01217.13	2.5e-61	205.2	Clat_adaptor_s	Clathrin adaptor complex small chain
BB454ONE002801	5	PF00091.18	2.7e-70	236.2	Tubulin	Tubulin/FtsZ family, GTPase domain
BB454ONE002801	5	PF03953.10	4.2e-51	171.9	Tubulin_C	Tubulin C-terminal domain
BB454ONE002802	5	PF00098.16	6e-08	31.9	zf-CCHC	Zinc knuckle
BB454ONE002804	4	PF00001.14	1.3e-53	181.4	7tm_1	7 transmembrane receptor (rhodopsin family)
BB454ONE002804	4	PF10320.2	1.1e-08	34.2	7TM_GPCR_Srsx	Serpentine type 7TM GPCR chemoreceptor Srsx
BB454ONE002805	3	PF00009.20	3.2e-61	205.7	GTP_EFTU	Elongation factor Tu GTP binding domain
BB454ONE002805	3	PF03764.11	2.4e-35	120.3	EFG_IV	Elongation factor G, domain IV
BB454ONE002805	3	PF00679.17	1.8e-21	75.4	EFG_C	Elongation factor G C-terminus
BB454ONE002805	3	PF03144.18	2.2e-09	36.9	GTP_EFTU_D2	Elongation factor Tu domain 2
BB454ONE002805	3	PF01926.16	5.1e-06	25.8	MMR_HSR1	GTPase of unknown function
BB454ONE002806	4	PF05694.4	5.8e-126	420.3	SBP56	56kDa selenium binding protein (SBP56)
BB454ONE002808	4	PF04857.13	9.8e-08	31.3	CAF1	CAF1 family ribonuclease
BB454ONE002808	5	PF04857.13	7.1e-10	38.3	CAF1	CAF1 family ribonuclease
BB454ONE002809	3	PF00091.18	4.8e-71	238.7	Tubulin	Tubulin/FtsZ family, GTPase domain
BB454ONE002809	3	PF03953.10	6.1e-09	35.7	Tubulin_C	Tubulin C-terminal domain
BB454ONE002810	4	PF00170.14	8.4e-09	34.9	bZIP_1	bZIP transcription factor
BB454ONE002810	4	PF07716.8	1.1e-08	34.4	bZIP_2	Basic region leucine zipper
BB454ONE002811	2	PF03723.7	8e-77	257.4	Hemocyanin_C	Hemocyanin, ig-like domain
BB454ONE002811	2	PF00372.12	8.3e-52	175.8	Hemocyanin_M	Hemocyanin, copper containing domain
BB454ONE002811	2	PF03722.7	6.8e-32	109.9	Hemocyanin_N	Hemocyanin, all-alpha domain
BB454ONE002812	5	PF00282.12	2.3e-163	542.6	Pyridoxal_deC	Pyridoxal-dependent decarboxylase conserved domain
BB454ONE002813	5	PF00226.24	1.4e-28	98.1	DnaJ	DnaJ domain
BB454ONE002814	6	PF00036.25	1.5e-06	26.7	efhand	EF hand
BB454ONE002815	6	PF00026.16	1.4e-91	306.7	Asp	Eukaryotic aspartyl protease
BB454ONE002816	2	PF00135.21	1.1e-129	433.2	COesterase	Carboxylesterase
BB454ONE002816	2	PF07859.6	3.9e-07	29.5	Abhydrolase_3	alpha/beta hydrolase fold
BB454ONE002818	5	PF01607.17	1.9e-08	33.8	CBM_14	Chitin binding Peritrophin-A domain
BB454ONE002819	6	PF02146.10	2e-15	56.6	SIR2	Sir2 family
BB454ONE002820	6	PF03645.6	6.4e-35	118.7	Tctex-1	Tctex-1 family
BB454ONE002821	5	PF06585.4	4e-68	228.5	JHBP	Haemolymph juvenile hormone binding protein (JHBP)
BB454ONE002822	6	PF00188.19	2.9e-21	75.9	CAP	Cysteine-rich secretory protein family
BB454ONE002823	6	PF01557.11	7.1e-49	165.8	FAA_hydrolase	Fumarylacetoacetate (FAA) hydrolase family
BB454ONE002823	6	PF09298.4	1.3e-31	108.4	DUF1969	Domain of unknown function (DUF1969)
BB454ONE002824	5	PF00071.15	3e-28	97.9	Ras	Ras family
BB454ONE002824	5	PF08477.6	1.8e-12	47.4	Miro	Miro-like protein
BB454ONE002825	4	PF06585.4	1.5e-56	190.7	JHBP	Haemolymph juvenile hormone binding protein (JHBP)
BB454ONE002826	4	PF00089.19	7.4e-61	205.2	Trypsin	Trypsin
BB454ONE002827	6	PF02902.12	6.8e-11	41.8	Peptidase_C48	Ulp1 protease family, C-terminal catalytic domain
BB454ONE002828	3	PF00573.15	1.7e-43	147.9	Ribosomal_L4	Ribosomal protein L4/L1 family
BB454ONE002830	5	PF09430.3	1.3e-33	115	DUF2012	Protein of unknown function (DUF2012)
BB454ONE002831	5	PF01105.17	5.6e-46	156.2	EMP24_GP25L	emp24/gp25L/p24 family/GOLD
BB454ONE002832	1	PF00076.15	1.8e-18	65.5	RRM_1	RNA recognition motif. (a.k.a. RRM, RBD, or RNP domain)
BB454ONE002832	1	PF00098.16	8.7e-06	25	zf-CCHC	Zinc knuckle
BB454ONE002833	5	PF01151.11	2.8e-55	187	ELO	GNS1/SUR4 family
BB454ONE002834	5	PF07690.9	8.9e-13	47.3	MFS_1	Major Facilitator Superfamily
BB454ONE002836	1	PF04117.5	9.3e-22	76.1	Mpv17_PMP22	Mpv17 / PMP22 family
BB454ONE002838	3	PF01491.9	3e-31	107.1	Frataxin_Cyay	Frataxin-like domain
BB454ONE002839	2	PF01105.17	5.8e-53	179	EMP24_GP25L	emp24/gp25L/p24 family/GOLD
BB454ONE002840	4	PF00300.15	3e-38	131	PGAM	Phosphoglycerate mutase family
BB454ONE002841	6	PF00631.15	6.4e-18	63.9	G-gamma	GGL domain
BB454ONE002842	2	PF10172.2	3.4e-19	68.1	DDA1	Det1 complexing ubiquitin ligase
BB454ONE002843	4	PF00254.21	7.2e-30	102.5	FKBP_C	FKBP-type peptidyl-prolyl cis-trans isomerase
BB454ONE002844	1	PF00287.11	9.4e-63	211.3	Na_K-ATPase	Sodium / potassium ATPase beta chain
BB454ONE002846	5	PF00640.16	9.5e-21	73.9	PID	Phosphotyrosine interaction domain (PTB/PID)
BB454ONE002847	6	PF00005.20	1.8e-17	63.5	ABC_tran	ABC transporter
BB454ONE002850	5	PF01133.10	7.5e-49	163.4	ER	Enhancer of rudimentary
BB454ONE002853	4	PF00379.16	1.3e-08	34.7	Chitin_bind_4	Insect cuticle protein
BB454ONE002854	6	PF00329.12	6.1e-34	116	Complex1_30kDa	Respiratory-chain NADH dehydrogenase, 30 Kd subunit
BB454ONE002856	1	PF09754.2	1.2e-10	41.3	PAC2	PAC2 family
BB454ONE002856	3	PF09754.2	1.2e-07	31.4	PAC2	PAC2 family
BB454ONE002857	3	PF12589.1	2.8e-18	65.8	WBS_methylT	Methyltransferase involved in Williams-Beuren syndrome
BB454ONE002859	5	PF02089.8	4.7e-64	215.7	Palm_thioest	Palmitoyl protein thioesterase
BB454ONE002860	6	PF05873.5	2.9e-50	169.7	Mt_ATP-synt_D	ATP synthase D chain, mitochondrial (ATP5H)
BB454ONE002862	4	PF00083.17	4.9e-27	94.2	Sugar_tr	Sugar (and other) transporter
BB454ONE002862	4	PF07690.9	4.5e-21	74.7	MFS_1	Major Facilitator Superfamily
BB454ONE002862	5	PF00083.17	2.1e-25	88.9	Sugar_tr	Sugar (and other) transporter
BB454ONE002862	5	PF07690.9	1e-06	27.4	MFS_1	Major Facilitator Superfamily
BB454ONE002863	5	PF00287.11	7.6e-26	90.2	Na_K-ATPase	Sodium / potassium ATPase beta chain
BB454ONE002864	5	PF00005.20	1.1e-17	64.1	ABC_tran	ABC transporter
BB454ONE002865	4	PF01956.9	2.1e-40	137.6	DUF106	Integral membrane protein DUF106
BB454ONE002866	2	PF07707.8	9.4e-35	118.2	BACK	BTB And C-terminal Kelch
BB454ONE002867	4	PF00106.18	1.1e-24	86.9	adh_short	short chain dehydrogenase
BB454ONE002867	4	PF08659.3	8.2e-11	41.5	KR	KR domain
BB454ONE002868	6	PF02373.15	3.9e-14	52.5	JmjC	JmjC domain
BB454ONE002869	1	PF00067.15	2.5e-62	210.6	p450	Cytochrome P450
BB454ONE002871	4	PF05719.4	1.4e-53	181.7	GPP34	Golgi phosphoprotein 3 (GPP34)
BB454ONE002872	2	PF00026.16	6.3e-94	314.4	Asp	Eukaryotic aspartyl protease
BB454ONE002873	3	PF00022.12	2.9e-59	200.1	Actin	Actin
BB454ONE002874	4	PF04722.6	6.3e-81	270	Ssu72	Ssu72-like protein
BB454ONE002875	6	PF01423.15	1.7e-20	71.9	LSM	LSM domain
BB454ONE002876	1	PF02823.9	1.8e-21	75.3	ATP-synt_DE_N	ATP synthase, Delta/Epsilon chain, beta-sandwich domain
BB454ONE002877	6	PF00379.16	1.5e-15	56.8	Chitin_bind_4	Insect cuticle protein
BB454ONE002878	5	PF05197.6	2.6e-82	274.7	TRIC	TRIC channel
BB454ONE002879	1	PF00089.19	3.7e-58	196.3	Trypsin	Trypsin
BB454ONE002880	5	PF00400.25	2.4e-06	26.9	WD40	WD domain, G-beta repeat
BB454ONE002880	6	PF00400.25	8.7e-06	25.1	WD40	WD domain, G-beta repeat
BB454ONE002883	2	PF00071.15	3.2e-60	201.8	Ras	Ras family
BB454ONE002883	2	PF08477.6	4.5e-19	68.7	Miro	Miro-like protein
BB454ONE002883	2	PF00025.14	1.4e-12	46.9	Arf	ADP-ribosylation factor family
BB454ONE002885	1	PF00274.12	1e-174	579.5	Glycolytic	Fructose-bisphosphate aldolase class-I
BB454ONE002886	6	PF00248.14	4.1e-67	225.7	Aldo_ket_red	Aldo/keto reductase family
BB454ONE002887	5	PF00227.19	3.4e-48	163.1	Proteasome	Proteasome subunit
BB454ONE002887	5	PF12465.1	2.5e-13	48.7	Pr_beta_C	Proteasome beta subunits C terminal
BB454ONE002892	6	PF01042.14	1.6e-41	140.5	Ribonuc_L-PSP	Endoribonuclease L-PSP
BB454ONE002893	5	PF05175.7	3.5e-08	32.7	MTS	Methyltransferase small domain
BB454ONE002893	5	PF08241.5	4.3e-08	33.1	Methyltransf_11	Methyltransferase domain
BB454ONE002893	5	PF03848.7	4.9e-06	25.5	TehB	Tellurite resistance protein TehB
BB454ONE002894	2	PF03009.10	3.3e-18	65.8	GDPD	Glycerophosphoryl diester phosphodiesterase family
BB454ONE002896	1	PF00135.21	1.8e-24	86	COesterase	Carboxylesterase
BB454ONE002898	4	PF00166.14	1.7e-30	104.4	Cpn10	Chaperonin 10 Kd subunit
BB454ONE002901	4	PF02146.10	2.2e-37	128.1	SIR2	Sir2 family
BB454ONE002903	3	PF00300.15	2.7e-32	111.6	PGAM	Phosphoglycerate mutase family
BB454ONE002903	3	PF01591.11	7e-25	87.1	6PF2K	6-phosphofructo-2-kinase
BB454ONE002905	1	PF01342.14	7.4e-25	86.1	SAND	SAND domain
BB454ONE002906	1	PF09280.4	6.9e-28	95.5	XPC-binding	XPC-binding domain
BB454ONE002906	1	PF00627.24	9e-13	47.3	UBA	UBA/TS-N domain
BB454ONE002907	5	PF00685.20	1.2e-32	113	Sulfotransfer_1	Sulfotransferase domain
BB454ONE002908	2	PF00254.21	3.6e-37	126	FKBP_C	FKBP-type peptidyl-prolyl cis-trans isomerase
BB454ONE002909	2	PF00300.15	9e-20	71	PGAM	Phosphoglycerate mutase family
BB454ONE002910	6	PF05328.5	1.6e-25	88.9	CybS	CybS
BB454ONE002911	5	PF00036.25	7.4e-06	24.6	efhand	EF hand
BB454ONE002912	3	PF00079.13	2.7e-29	102.2	Serpin	Serpin (serine protease inhibitor)
BB454ONE002913	5	PF00335.13	7.1e-06	25.1	Tetraspannin	Tetraspanin family
BB454ONE002914	2	PF02921.7	1.8e-26	91.8	UCR_TM	Ubiquinol cytochrome reductase transmembrane region
BB454ONE002914	2	PF00355.19	3.1e-15	55.1	Rieske	Rieske [2Fe-2S] domain
BB454ONE002915	6	PF00050.14	1.2e-09	37.6	Kazal_1	Kazal-type serine protease inhibitor domain
BB454ONE002915	6	PF07648.8	8e-09	34.9	Kazal_2	Kazal-type serine protease inhibitor domain
BB454ONE002916	1	PF03807.10	1.5e-16	60.2	F420_oxidored	NADP oxidoreductase coenzyme F420-dependent
BB454ONE002917	5	PF01625.14	6.8e-49	165.4	PMSR	Peptide methionine sulfoxide reductase
BB454ONE002920	6	PF02798.13	2.4e-16	59.3	GST_N	Glutathione S-transferase, N-terminal domain
BB454ONE002920	6	PF00043.18	4.2e-06	26.3	GST_C	Glutathione S-transferase, C-terminal domain
BB454ONE002921	3	PF01201.15	4.8e-52	175.2	Ribosomal_S8e	Ribosomal protein S8e
BB454ONE002923	2	PF00168.23	6e-09	35.3	C2	C2 domain
BB454ONE002924	4	PF04587.8	4.5e-12	44.6	ADP_PFK_GK	ADP-specific Phosphofructokinase/Glucokinase conserved region
BB454ONE002926	2	PF01991.11	7.6e-63	211	vATP-synt_E	ATP synthase (E/31 kDa) subunit
BB454ONE002927	5	PF00156.20	1.8e-06	27.3	Pribosyltran	Phosphoribosyl transferase domain
BB454ONE002928	1	PF08534.3	6.9e-35	119.4	Redoxin	Redoxin
BB454ONE002928	1	PF00578.14	7.2e-17	60.9	AhpC-TSA	AhpC/TSA family
BB454ONE002929	5	PF01775.10	3.9e-55	184.7	Ribosomal_L18ae	Ribosomal L18ae/LX protein domain
BB454ONE002930	4	PF00226.24	9.8e-20	69.7	DnaJ	DnaJ domain
BB454ONE002933	2	PF00180.13	1.3e-41	142.3	Iso_dh	Isocitrate/isopropylmalate dehydrogenase
BB454ONE002934	6	PF00043.18	1.5e-08	34.2	GST_C	Glutathione S-transferase, C-terminal domain
BB454ONE002934	6	PF02798.13	1.9e-08	34	GST_N	Glutathione S-transferase, N-terminal domain
BB454ONE002936	3	PF00650.13	2.8e-11	42.8	CRAL_TRIO	CRAL/TRIO domain
BB454ONE002937	2	PF04815.8	9.1e-22	76.1	Sec23_helical	Sec23/Sec24 helical domain
BB454ONE002938	3	PF00071.15	2.4e-48	163.2	Ras	Ras family
BB454ONE002938	3	PF08477.6	7.7e-16	58.3	Miro	Miro-like protein
BB454ONE002938	3	PF00025.14	3.4e-10	39.1	Arf	ADP-ribosylation factor family
BB454ONE002939	4	PF00004.22	4.8e-08	33	AAA	ATPase family associated with various cellular activities (AAA)
BB454ONE002940	4	PF00080.13	1.2e-46	158.1	Sod_Cu	Copper/zinc superoxide dismutase (SODC)
BB454ONE002941	6	PF01650.11	2.6e-94	314.9	Peptidase_C13	Peptidase C13 family
BB454ONE002942	3	PF03665.6	1.2e-40	138.7	UPF0172	Uncharacterised protein family (UPF0172)
BB454ONE002943	4	PF00069.18	5.7e-18	64.7	Pkinase	Protein kinase domain
BB454ONE002943	4	PF07714.10	1.6e-11	43.5	Pkinase_Tyr	Protein tyrosine kinase
BB454ONE002946	3	PF00083.17	3.2e-11	42.1	Sugar_tr	Sugar (and other) transporter
BB454ONE002949	2	PF01223.16	9.8e-29	100.1	Endonuclease_NS	DNA/RNA non-specific endonuclease
BB454ONE002951	3	PF02114.9	2.9e-08	32.4	Phosducin	Phosducin
BB454ONE002952	5	PF00026.16	6e-35	120.6	Asp	Eukaryotic aspartyl protease
BB454ONE002953	1	PF00400.25	5.3e-09	35.3	WD40	WD domain, G-beta repeat
BB454ONE002955	2	PF06553.5	4.7e-18	65	BNIP3	BNIP3
BB454ONE002956	1	PF02466.12	5.4e-08	32.4	Tim17	Tim17/Tim22/Tim23 family
BB454ONE002957	1	PF00206.13	3.9e-37	127.8	Lyase_1	Lyase
BB454ONE002957	1	PF10415.2	3.8e-27	93.8	FumaraseC_C	Fumarase C C-terminus
BB454ONE002958	5	PF01470.10	5.1e-19	68.6	Peptidase_C15	Pyroglutamyl peptidase
BB454ONE002960	2	PF00118.17	2.5e-62	210.7	Cpn60_TCP1	TCP-1/cpn60 chaperonin family
BB454ONE002961	5	PF03137.13	6e-60	202.5	OATP	Organic Anion Transporter Polypeptide (OATP) family
BB454ONE002962	3	PF03464.8	2e-46	157.3	eRF1_2	eRF1 domain 2
BB454ONE002962	3	PF03465.8	2.1e-38	130.7	eRF1_3	eRF1 domain 3
BB454ONE002962	3	PF03463.8	6.1e-27	93.4	eRF1_1	eRF1 domain 1
BB454ONE002963	1	PF01722.11	1.1e-28	98.5	BolA	BolA-like protein
BB454ONE002965	6	PF00180.13	1.6e-16	59.9	Iso_dh	Isocitrate/isopropylmalate dehydrogenase
BB454ONE002967	4	PF04774.8	4.6e-18	65.3	HABP4_PAI-RBP1	Hyaluronan / mRNA binding family
BB454ONE002968	4	PF00067.15	3e-81	272.9	p450	Cytochrome P450
BB454ONE002969	3	PF01157.11	2.9e-42	142.1	Ribosomal_L21e	Ribosomal protein L21e
BB454ONE002971	5	PF06003.5	1.5e-19	69.8	SMN	Survival motor neuron protein (SMN)
BB454ONE002974	2	PF10262.2	2.5e-19	68.7	Rdx	Rdx family
[truncated: 5,403 more rows]
