# Supplementary material for: Transcriptomics of the Bed Bug (Cimex lectularius)
Source: PLoS One. 2011 Jan 19;6(1):e16336. doi: 10.1371/journal.pone.0016336 (PMC3023805; doi:10.1371/journal.pone.0016336)
Supplement: Table S5 — Putative SNPs in C. lectularius sequences. (XLSX) [file pone.0016336.s005.xlsx]

## Sheet: SNPs
Sequence ID	Position	Consensus	Variant	Read depth	Variant percentage
BB454ONE000031	602	C	T	63	0.48
BB454ONE000073	8	G	A	33	0.39
BB454ONE000073	11	A	G	33	0.39
BB454ONE000073	26	G	T	110	0.27
BB454ONE000073	29	A	G	110	0.27
BB454ONE000073	31	C	T	110	0.27
BB454ONE000073	38	A	T	117	0.18
BB454ONE000073	38	A	T	116	0.18
BB454ONE000073	44	T	A	116	0.18
BB454ONE000073	47	T	A	119	0.11
BB454ONE000073	52	T	C	121	0.18
BB454ONE000073	59	T	G	120	0.11
BB454ONE000073	61	C	T	120	0.11
BB454ONE000073	68	T	G	123	0.11
BB454ONE000073	74	G	A	121	0.26
BB454ONE000073	80	T	A	123	0.12
BB454ONE000073	89	G	A	125	0.24
BB454ONE000073	101	G	A	127	0.2
BB454ONE000073	155	A	G	127	0.08
BB454ONE000073	233	A	G	92	0.1
BB454ONE000073	359	G	A	40	0.15
BB454ONE000073	407	T	C	27	0.26
BB454ONE000073	409	G	A	27	0.26
BB454ONE000083	36	G	T	29	0.28
BB454ONE000083	57	C	T	33	0.27
BB454ONE000083	64	G	T	36	0.33
BB454ONE000083	115	C	A	42	0.36
BB454ONE000083	167	A	T	41	0.37
BB454ONE000083	184	C	G	41	0.39
BB454ONE000083	196	C	G	42	0.38
BB454ONE000083	223	A	G	42	0.36
BB454ONE000083	225	A	C	42	0.36
BB454ONE000083	230	G	A	42	0.38
BB454ONE000083	239	C	T	42	0.38
BB454ONE000083	242	C	A	42	0.38
BB454ONE000083	261	G	A	42	0.38
BB454ONE000083	264	T	C	42	0.38
BB454ONE000083	288	A	G	38	0.42
BB454ONE000083	289	A	G	38	0.42
BB454ONE000083	296	G	A	29	0.45
BB454ONE000083	300	G	T	29	0.45
BB454ONE000084	157	G	A	40	0.12
BB454ONE000084	169	C	T	42	0.17
BB454ONE000084	171	A	G	42	0.17
BB454ONE000084	186	G	A	47	0.23
BB454ONE000084	195	C	G	48	0.25
BB454ONE000084	199	G	T	48	0.25
BB454ONE000084	232	T	G	51	0.24
BB454ONE000084	254	T	C	53	0.28
BB454ONE000084	261	T	A	53	0.28
BB454ONE000084	263	G	A	53	0.28
BB454ONE000084	312	A	T	53	0.25
BB454ONE000084	345	G	C	51	0.25
BB454ONE000084	375	C	T	44	0.3
BB454ONE000084	392	C	T	42	0.29
BB454ONE000084	398	G	T	42	0.29
BB454ONE000084	406	C	G	31	0.16
BB454ONE000084	408	G	T	31	0.16
BB454ONE000084	409	C	T	31	0.16
BB454ONE000084	412	A	G	31	0.16
BB454ONE000084	415	G	A	31	0.16
BB454ONE000084	418	A	G	31	0.16
BB454ONE000084	419	T	G	31	0.16
BB454ONE000085	231	T	C	112	0.48
BB454ONE000085	231	T	C	112	0.48
BB454ONE000085	249	A	C	116	0.25
BB454ONE000085	258	T	C	121	0.25
BB454ONE000085	363	G	A	135	0.27
BB454ONE000098	373	A	T	62	0.44
BB454ONE000098	590	A	G	21	0.43
BB454ONE000227	386	A	G	24	0.5
BB454ONE000227	395	T	C	23	0.48
BB454ONE000260	351	C	G	28	0.46
BB454ONE000260	507	C	T	22	0.32
BB454ONE000260	660	C	T	14	0.43
BB454ONE000261	341	C	T	10	0.4
BB454ONE000261	382	A	T	13	0.38
BB454ONE000279	536	T	G	10	0.4
BB454ONE000319	215	G	A	29	0.48
BB454ONE000319	464	A	G	39	0.41
BB454ONE000405	673	G	A	17	0.29
BB454ONE000434	774	C	A	18	0.28
BB454ONE000434	980	C	T	21	0.38
BB454ONE000434	1073	T	C	19	0.32
BB454ONE000434	1094	A	G	19	0.32
BB454ONE000434	1130	G	A	19	0.32
BB454ONE000434	1166	C	T	21	0.29
BB454ONE000434	1550	C	T	22	0.41
BB454ONE000437	694	G	A	33	0.18
BB454ONE000437	719	A	T	33	0.18
BB454ONE000483	144	G	A	24	0.5
BB454ONE000509	125	G	A	21	0.43
BB454ONE000509	194	G	A	24	0.46
BB454ONE000509	275	G	C	21	0.48
BB454ONE000509	292	T	C	22	0.5
BB454ONE000509	377	T	A	18	0.33
BB454ONE000540	319	C	T	183	0.34
BB454ONE000540	340	G	T	168	0.21
BB454ONE000540	520	C	T	78	0.27
BB454ONE000572	91	G	C	22	0.23
BB454ONE000572	214	C	T	33	0.39
BB454ONE000572	244	C	T	34	0.41
BB454ONE000585	193	C	T	19	0.37
BB454ONE000592	407	T	C	35	0.34
BB454ONE000593	256	C	T	10	0.5
BB454ONE000593	458	T	C	19	0.42
BB454ONE000628	1244	T	A	63	0.13
BB454ONE000630	71	T	A	24	0.29
BB454ONE000630	76	C	A	24	0.29
BB454ONE000630	128	A	G	28	0.32
BB454ONE000630	447	C	G	18	0.39
BB454ONE000751	902	T	A	27	0.26
BB454ONE000822	155	T	C	10	0.4
BB454ONE000822	158	G	A	10	0.4
BB454ONE000822	179	T	C	15	0.33
BB454ONE000822	230	A	G	14	0.36
BB454ONE000822	242	A	C	13	0.46
BB454ONE000823	218	G	T	14	0.5
BB454ONE000840	580	C	T	42	0.33
BB454ONE000841	400	C	T	95	0.26
BB454ONE000844	2161	C	T	8	0.5
BB454ONE000864	1339	T	A	14	0.36
BB454ONE000864	1537	T	G	10	0.4
BB454ONE000883	1062	A	G	22	0.36
BB454ONE000900	861	C	T	11	0.45
BB454ONE000900	1062	C	T	8	0.5
BB454ONE000915	183	T	G	15	0.4
BB454ONE000917	168	T	C	17	0.29
BB454ONE000960	244	A	G	10	0.4
BB454ONE000965	415	G	A	42	0.26
BB454ONE001018	156	A	G	19	0.42
BB454ONE001018	401	T	C	21	0.33
BB454ONE001018	860	C	T	8	0.5
BB454ONE001029	236	C	T	32	0.22
BB454ONE001033	271	G	A	30	0.3
BB454ONE001033	280	C	T	30	0.3
BB454ONE001033	364	C	T	32	0.28
BB454ONE001056	441	A	T	21	0.29
BB454ONE001101	348	C	T	38	0.34
BB454ONE001101	399	C	T	35	0.37
BB454ONE001104	143	G	C	31	0.45
BB454ONE001104	236	T	C	40	0.45
BB454ONE001104	377	C	T	36	0.42
BB454ONE001114	385	A	C	24	0.42
BB454ONE001122	134	T	C	8	0.5
BB454ONE001158	333	C	T	26	0.5
BB454ONE001293	345	G	C	12	0.42
BB454ONE001328	1022	G	A	8	0.5
BB454ONE001499	269	C	T	70	0.34
BB454ONE001499	416	A	G	60	0.32
BB454ONE001531	263	C	T	19	0.37
BB454ONE001531	362	A	G	23	0.35
BB454ONE001531	653	A	G	12	0.42
BB454ONE001575	443	G	T	16	0.44
BB454ONE001575	959	A	G	8	0.5
BB454ONE001614	276	T	C	13	0.31
BB454ONE001614	315	C	T	13	0.31
BB454ONE001638	86	C	T	12	0.42
BB454ONE001638	97	C	G	14	0.5
BB454ONE001735	372	T	C	8	0.5
BB454ONE001743	389	A	G	15	0.33
BB454ONE001743	395	G	A	15	0.33
BB454ONE001743	533	G	A	13	0.46
BB454ONE001743	563	G	A	13	0.46
BB454ONE001744	78	A	G	43	0.28
BB454ONE001744	224	T	C	70	0.21
BB454ONE001744	348	A	G	75	0.19
BB454ONE001746	48	A	T	24	0.21
BB454ONE001746	248	T	C	52	0.48
BB454ONE001748	495	G	A	17	0.35
BB454ONE001753	303	G	A	78	0.22
BB454ONE001765	78	C	T	30	0.3
BB454ONE001765	132	C	A	37	0.32
BB454ONE001887	411	C	T	31	0.23
BB454ONE001978	384	A	T	23	0.48
BB454ONE001978	405	G	A	28	0.39
BB454ONE001978	660	A	G	16	0.31
BB454ONE001992	545	A	G	19	0.47
BB454ONE001992	569	G	T	17	0.47
BB454ONE001992	694	C	G	19	0.47
BB454ONE001992	956	G	A	23	0.48
BB454ONE001992	1172	T	C	17	0.41
BB454ONE001992	1304	T	C	12	0.42
BB454ONE002015	1218	T	C	13	0.31
BB454ONE002018	315	T	G	17	0.29
BB454ONE002039	185	C	T	40	0.47
BB454ONE002045	61	G	A	32	0.22
BB454ONE002045	126	C	T	43	0.4
BB454ONE002045	183	G	A	46	0.22
BB454ONE002045	231	T	C	46	0.46
BB454ONE002045	252	A	G	46	0.17
BB454ONE002045	359	A	T	46	0.2
BB454ONE002045	417	A	G	38	0.13
BB454ONE002045	456	C	A	31	0.42
BB454ONE002054	316	G	A	38	0.16
BB454ONE002122	155	G	A	15	0.27
BB454ONE002122	344	A	G	23	0.35
BB454ONE002148	418	T	C	13	0.38
BB454ONE002190	167	A	C	11	0.45
BB454ONE002190	173	T	C	11	0.45
BB454ONE002190	182	A	G	12	0.42
BB454ONE002190	239	G	C	17	0.24
BB454ONE002190	338	T	C	19	0.42
BB454ONE002191	259	G	A	10	0.4
BB454ONE002241	204	C	T	15	0.33
BB454ONE002241	439	C	T	20	0.2
BB454ONE002354	210	A	T	10	0.4
BB454ONE002354	525	C	A	8	0.5
BB454ONE002433	683	C	T	11	0.45
BB454ONE002433	868	G	A	10	0.5
BB454ONE002461	297	G	A	36	0.28
BB454ONE002469	1219	A	C	10	0.4
BB454ONE002477	509	T	A	17	0.47
BB454ONE002477	767	A	T	19	0.42
BB454ONE002543	176	T	A	27	0.33
BB454ONE002543	429	T	A	26	0.31
BB454ONE002557	825	G	A	63	0.33
BB454ONE002697	904	C	T	8	0.5
BB454ONE002711	348	T	C	16	0.25
BB454ONE002714	431	C	T	26	0.31
BB454ONE002731	820	T	C	17	0.24
BB454ONE002734	420	T	C	10	0.5
BB454ONE002776	1253	C	T	16	0.5
BB454ONE002776	1466	C	T	13	0.38
BB454ONE002799	380	C	A	13	0.38
BB454ONE002805	1031	A	G	14	0.36
BB454ONE002805	2777	G	A	29	0.31
BB454ONE002805	2967	T	C	18	0.33
BB454ONE002805	3113	C	A	10	0.4
BB454ONE002805	3179	A	T	15	0.27
BB454ONE002812	130	T	C	18	0.44
BB454ONE002812	758	T	C	14	0.36
BB454ONE002814	549	A	G	18	0.39
BB454ONE002825	384	A	C	13	0.46
BB454ONE002828	329	A	T	17	0.29
BB454ONE002828	425	T	A	19	0.47
BB454ONE002836	414	C	T	10	0.4
BB454ONE002862	341	C	A	23	0.22
BB454ONE002862	341	C	A	23	0.22
BB454ONE002862	925	T	G	15	0.27
BB454ONE002886	168	C	A	10	0.4
BB454ONE002929	98	C	T	15	0.47
BB454ONE002929	434	A	G	25	0.4
BB454ONE002940	130	T	G	11	0.45
BB454ONE002940	193	G	A	17	0.24
BB454ONE002947	488	T	G	26	0.27
BB454ONE002949	541	G	C	11	0.45
BB454ONE002953	1161	T	A	11	0.45
BB454ONE002969	39	A	G	11	0.45
BB454ONE002969	42	G	A	11	0.45
BB454ONE002969	356	C	T	24	0.37
BB454ONE002978	805	A	G	13	0.38
BB454ONE003004	604	C	T	13	0.46
BB454ONE003004	757	C	T	13	0.46
BB454ONE003004	758	C	T	13	0.46
BB454ONE003004	757	C	T	13	0.31
BB454ONE003004	758	C	T	13	0.31
BB454ONE003005	363	T	C	10	0.5
BB454ONE003029	552	T	C	18	0.28
BB454ONE003029	561	C	T	18	0.28
BB454ONE003030	307	G	A	13	0.46
BB454ONE003030	334	A	G	12	0.42
BB454ONE003039	197	C	T	24	0.17
BB454ONE003039	287	T	C	28	0.18
BB454ONE003039	341	G	A	29	0.14
BB454ONE003050	699	A	G	22	0.32
BB454ONE003050	774	C	T	17	0.35
BB454ONE003062	456	T	C	8	0.5
BB454ONE003078	100	C	T	12	0.42
BB454ONE003078	128	G	T	15	0.47
BB454ONE003119	263	G	A	10	0.4
BB454ONE003119	296	G	A	10	0.4
BB454ONE003144	334	T	C	34	0.32
BB454ONE003144	788	A	G	40	0.22
BB454ONE003144	968	G	A	46	0.28
BB454ONE003144	1169	T	G	39	0.36
BB454ONE003183	248	T	G	86	0.17
BB454ONE003221	245	T	G	44	0.11
BB454ONE003241	1654	A	G	10	0.5
BB454ONE003312	207	T	C	8	0.5
BB454ONE003357	729	T	A	15	0.47
BB454ONE003536	359	T	C	10	0.4
BB454ONE003615	18	T	G	8	0.5
BB454ONE003634	433	G	C	10	0.5
BB454ONE003692	695	T	C	22	0.27
BB454ONE003694	231	A	C	10	0.4
BB454ONE003703	1044	G	T	23	0.39
BB454ONE003740	257	T	C	12	0.42
BB454ONE003740	263	G	A	13	0.46
BB454ONE003796	409	T	C	19	0.26
BB454ONE003796	475	A	G	15	0.33
BB454ONE003796	483	C	T	15	0.33
BB454ONE003836	462	A	T	16	0.25
BB454ONE003889	397	C	T	11	0.45
BB454ONE003889	405	C	A	11	0.45
BB454ONE003889	459	T	C	13	0.46
