# Supplementary material for: Transcriptomics of the Bed Bug (Cimex lectularius)
Source: PLoS One. 2011 Jan 19;6(1):e16336. doi: 10.1371/journal.pone.0016336 (PMC3023805; doi:10.1371/journal.pone.0016336)
Supplement: Table S6 — Putative microsatellite loci in C. lectularius sequences. (XLSX) [file pone.0016336.s006.xlsx]

## Sheet: Table_S1_microsat_repeats_summa
genome	genome_length	start	stop	motif_units	footprint	repeat_units
BB454ONE000055	872	674	688	(aat)5	15	5
BB454ONE000056	804	606	620	(aat)5	15	5
BB454ONE000077	2957	1305	1320	(ta)8	16	8
BB454ONE000078	2957	1305	1320	(ta)8	16	8
BB454ONE000079	2915	1263	1278	(ta)8	16	8
BB454ONE000080	2915	1263	1278	(ta)8	16	8
BB454ONE000081	2835	1183	1198	(ta)8	16	8
BB454ONE000082	2835	1183	1198	(ta)8	16	8
BB454ONE000136	1337	473	487	(att)5	15	5
BB454ONE000137	1206	342	356	(att)5	15	5
BB454ONE000138	926	62	76	(att)5	15	5
BB454ONE000149	1044	582	602	(cag)7	21	7
BB454ONE000149	1044	604	633	(aca)10	30	10
BB454ONE000150	1093	631	651	(cag)7	21	7
BB454ONE000150	1093	653	682	(aca)10	30	10
BB454ONE000151	959	503	517	(cag)5	15	5
BB454ONE000151	959	519	548	(aca)10	30	10
BB454ONE000159	876	442	467	(ct)13	26	13
BB454ONE000160	881	442	467	(ct)13	26	13
BB454ONE000250	927	876	895	(ttat)5	20	5
BB454ONE000251	928	877	896	(ttat)5	20	5
BB454ONE000326	2686	1152	1166	(gaa)5	15	5
BB454ONE000327	1753	219	233	(gaa)5	15	5
BB454ONE000346	712	258	277	(ac)10	20	10
BB454ONE000499	2160	648	665	(aca)6	18	6
BB454ONE000500	2114	602	619	(aca)6	18	6
BB454ONE000554	1064	37	54	(aat)6	18	6
BB454ONE000588	1980	1593	1607	(tct)5	15	5
BB454ONE000589	500	113	127	(tct)5	15	5
BB454ONE000610	310	224	238	(tcc)5	15	5
BB454ONE000610	310	239	253	(tca)5	15	5
BB454ONE000828	614	509	523	(gaa)5	15	5
BB454ONE000829	349	244	258	(gaa)5	15	5
BB454ONE000883	1347	64	81	(at)9	18	9
BB454ONE000910	507	214	234	(att)7	21	7
BB454ONE000969	1687	981	995	(tta)5	15	5
BB454ONE001137	1194	1020	1034	(tat)5	15	5
BB454ONE001151	623	7	24	(att)6	18	6
BB454ONE001161	475	4	35	(ct)16	32	16
BB454ONE001206	489	375	395	(att)7	21	7
BB454ONE001215	466	130	147	(aat)6	18	6
BB454ONE001258	479	395	409	(ctt)5	15	5
BB454ONE001334	837	799	818	(ataa)5	20	5
BB454ONE001339	933	275	289	(aat)5	15	5
BB454ONE001342	1005	830	847	(att)6	18	6
BB454ONE001401	482	457	474	(tta)6	18	6
BB454ONE001444	510	105	119	(tta)5	15	5
BB454ONE001456	1431	284	298	(ttc)5	15	5
BB454ONE001468	668	596	610	(taa)5	15	5
BB454ONE001521	560	200	214	(ctt)5	15	5
BB454ONE001539	366	335	358	(ta)12	24	12
BB454ONE001560	540	2	17	(ct)8	16	8
BB454ONE001575	1197	817	831	(cac)5	15	5
BB454ONE001590	459	438	452	(tta)5	15	5
BB454ONE001606	1169	304	318	(aat)5	15	5
BB454ONE001672	1039	915	929	(ctt)5	15	5
BB454ONE001722	480	454	468	(aat)5	15	5
BB454ONE001778	450	200	214	(att)5	15	5
BB454ONE001853	526	23	37	(taa)5	15	5
BB454ONE001981	987	906	947	(tta)14	42	14
BB454ONE001982	596	419	433	(atc)5	15	5
BB454ONE001986	1608	696	710	(tgc)5	15	5
BB454ONE002057	978	573	593	(att)7	21	7
BB454ONE002070	611	321	335	(tta)5	15	5
BB454ONE002094	544	449	466	(taa)6	18	6
BB454ONE002130	554	461	484	(gat)8	24	8
BB454ONE002198	466	395	415	(gtt)7	21	7
BB454ONE002268	894	17	32	(tc)8	16	8
BB454ONE002320	1294	1023	1037	(gaa)5	15	5
BB454ONE002401	616	92	109	(tat)6	18	6
BB454ONE002452	976	327	341	(aca)5	15	5
BB454ONE002462	874	452	466	(ttc)5	15	5
BB454ONE002629	1002	530	544	(aca)5	15	5
BB454ONE002658	1293	414	431	(gga)6	18	6
BB454ONE002729	488	410	427	(ac)9	18	9
BB454ONE002792	1541	327	341	(aat)5	15	5
BB454ONE002804	1784	543	557	(tgc)5	15	5
BB454ONE002893	804	679	693	(ctt)5	15	5
BB454ONE003018	593	470	484	(ctg)5	15	5
BB454ONE003029	863	643	657	(gga)5	15	5
BB454ONE003116	733	686	709	(taa)8	24	8
BB454ONE003192	2170	1843	1860	(tta)6	18	6
BB454ONE003217	485	407	424	(aat)6	18	6
BB454ONE003232	1336	1158	1172	(tgg)5	15	5
BB454ONE003474	813	606	620	(tta)5	15	5
BB454ONE003530	622	79	93	(aat)5	15	5
BB454ONE003585	499	319	333	(gac)5	15	5
BB454ONE003640	936	52	67	(at)8	16	8
BB454ONE003720	804	167	181	(gaa)5	15	5
BB454ONE003779	750	4	18	(ata)5	15	5
BB454ONE003808	929	333	350	(tca)6	18	6
BB454ONE003939	215	49	68	(attt)5	20	5
BB454ONE004024	465	161	178	(tga)6	18	6
BB454ONE004088	350	329	344	(ta)8	16	8
BB454ONE004111	181	158	175	(ta)9	18	9
BB454ONE004285	465	104	121	(ttc)6	18	6
BB454ONE004405	54	1	15	(aag)5	15	5
BB454ONE004677	255	136	159	(tta)8	24	8
BB454ONE004703	373	52	69	(ata)6	18	6
BB454ONE005129	256	68	87	(ta)10	20	10
BB454ONE005476	473	331	345	(ttg)5	15	5
BB454ONE005510	356	220	235	(at)8	16	8
BB454ONE005607	508	480	497	(ata)6	18	6
BB454ONE005757	453	364	384	(tca)7	21	7
BB454ONE005871	409	188	202	(tat)5	15	5
BB454ONE005940	478	99	113	(gga)5	15	5
BB454ONE006156	484	408	423	(ga)8	16	8
BB454ONE006162	422	317	331	(gat)5	15	5
BB454ONE006224	245	120	139	(tg)10	20	10
BB454ONE006253	282	258	281	(ta)12	24	12
BB454ONE006288	482	354	368	(cac)5	15	5
BB454ONE006315	89	26	43	(att)6	18	6
BB454ONE006354	442	26	40	(ttc)5	15	5
BB454ONE006354	442	58	75	(ttc)6	18	6
BB454ONE006415	420	357	371	(caa)5	15	5
BB454ONE006564	166	127	146	(at)10	20	10
BB454ONE007006	491	63	77	(tca)5	15	5
BB454ONE007278	477	329	343	(tga)5	15	5
BB454ONE007294	400	139	154	(ta)8	16	8
BB454ONE007342	443	135	152	(agg)6	18	6
BB454ONE007700	357	285	300	(at)8	16	8
BB454ONE007931	427	399	414	(ta)8	16	8
BB454ONE008100	489	422	436	(gat)5	15	5
BB454ONE008124	362	10	24	(tct)5	15	5
BB454ONE008500	421	240	260	(att)7	21	7
BB454ONE008504	350	326	343	(aat)6	18	6
BB454ONE008571	352	61	76	(ca)8	16	8
BB454ONE008707	424	130	144	(ttc)5	15	5
BB454ONE008886	493	448	465	(tgt)6	18	6
BB454ONE008944	70	48	69	(tc)11	22	11
BB454ONE009023	440	259	273	(aag)5	15	5
BB454ONE009081	395	271	285	(taa)5	15	5
BB454ONE009122	413	309	326	(gcg)6	18	6
BB454ONE009308	581	475	489	(tga)5	15	5
BB454ONE009451	517	396	423	(gagt)7	28	7
BB454ONE009455	424	409	424	(ct)8	16	8
BB454ONE009611	437	344	358	(aat)5	15	5
BB454ONE009616	450	119	136	(tct)6	18	6
BB454ONE009718	451	374	388	(ata)5	15	5
BB454ONE009774	505	348	371	(ctca)6	24	6
BB454ONE009948	467	379	393	(tta)5	15	5
BB454ONE010074	531	509	524	(tg)8	16	8
BB454ONE010361	112	25	94	(tg)35	70	35
BB454ONE010361	112	95	112	(ag)9	18	9
BB454ONE010429	403	347	361	(att)5	15	5
BB454ONE010480	491	164	178	(tca)5	15	5
BB454ONE010502	409	171	185	(taa)5	15	5
BB454ONE010584	306	259	276	(acg)6	18	6
BB454ONE010753	381	215	234	(attt)5	20	5
BB454ONE010994	186	121	164	(ca)22	44	22
BB454ONE011056	403	323	343	(tta)7	21	7
BB454ONE011141	369	220	243	(tat)8	24	8
BB454ONE011141	369	249	263	(ttg)5	15	5
BB454ONE011278	478	415	430	(ca)8	16	8
BB454ONE011492	383	84	98	(atg)5	15	5
BB454ONE011719	234	218	232	(caa)5	15	5
BB454ONE011784	284	88	103	(ga)8	16	8
BB454ONE011839	431	131	145	(tta)5	15	5
BB454ONE011989	453	11	26	(ta)8	16	8
BB454ONE012198	437	135	149	(tta)5	15	5
BB454ONE012200	498	418	432	(taa)5	15	5
BB454ONE012305	197	176	190	(tta)5	15	5
BB454ONE012360	417	46	63	(cag)6	18	6
BB454ONE012360	417	64	78	(caa)5	15	5
BB454ONE012642	470	194	208	(gac)5	15	5
BB454ONE012686	433	275	292	(ct)9	18	9
BB454ONE012876	220	184	215	(ac)16	32	16
BB454ONE012944	475	396	410	(gcc)5	15	5
BB454ONE012944	475	411	428	(gca)6	18	6
BB454ONE013059	520	153	172	(tatt)5	20	5
BB454ONE013166	99	72	87	(ga)8	16	8
BB454ONE013186	346	204	230	(atc)9	27	9
BB454ONE013437	353	291	308	(tca)6	18	6
BB454ONE013469	130	49	66	(tc)9	18	9
BB454ONE013469	130	112	129	(tc)9	18	9
BB454ONE013587	508	19	33	(ttc)5	15	5
BB454ONE013651	339	1	18	(gaa)6	18	6
BB454ONE013799	215	197	211	(gtg)5	15	5
BB454ONE013861	447	429	443	(ctt)5	15	5
BB454ONE014016	274	259	274	(ct)8	16	8
BB454ONE014023	78	51	66	(at)8	16	8
BB454ONE014025	388	225	239	(aat)5	15	5
BB454ONE014029	261	32	49	(tat)6	18	6
BB454ONE014070	252	153	170	(tat)6	18	6
BB454ONE014400	426	238	253	(tg)8	16	8
BB454ONE014441	427	213	227	(aat)5	15	5
BB454ONE014628	413	264	278	(gat)5	15	5
BB454ONE014638	286	140	155	(at)8	16	8
BB454ONE014756	370	225	242	(ta)9	18	9
BB454ONE014769	386	248	268	(tga)7	21	7
BB454ONE014789	441	332	347	(at)8	16	8
BB454ONE014830	421	343	363	(att)7	21	7
BB454ONE015061	429	400	415	(at)8	16	8
BB454ONE015143	420	378	392	(ttc)5	15	5
BB454ONE015523	432	145	159	(cag)5	15	5
BB454ONE015543	439	202	219	(tct)6	18	6
BB454ONE015543	439	261	275	(aga)5	15	5
BB454ONE015543	439	397	417	(tcc)7	21	7
BB454ONE016067	440	276	302	(ata)9	27	9
BB454ONE016231	382	361	375	(att)5	15	5
BB454ONE016244	428	356	376	(tca)7	21	7
BB454ONE016404	365	42	57	(ca)8	16	8
BB454ONE016408	57	5	19	(tat)5	15	5
BB454ONE016680	102	33	68	(taa)12	36	12
BB454ONE016698	263	65	82	(tat)6	18	6
BB454ONE016698	263	128	145	(tc)9	18	9
BB454ONE016698	263	146	167	(ac)11	22	11
BB454ONE016799	428	233	250	(tca)6	18	6
BB454ONE016953	248	206	223	(at)9	18	9
BB454ONE016987	476	45	59	(ata)5	15	5
BB454ONE017018	425	33	47	(ttc)5	15	5
BB454ONE017107	475	386	403	(aag)6	18	6
BB454ONE017158	490	385	399	(aac)5	15	5
BB454ONE017253	488	41	55	(taa)5	15	5
BB454ONE017267	379	174	191	(aat)6	18	6
BB454ONE017327	427	295	309	(att)5	15	5
BB454ONE017413	352	337	351	(att)5	15	5
BB454ONE017618	110	26	67	(taa)14	42	14
BB454ONE017627	443	306	320	(att)5	15	5
BB454ONE017678	426	217	232	(ga)8	16	8
BB454ONE017797	444	422	436	(ttc)5	15	5
BB454ONE017808	242	3	22	(tatt)5	20	5
BB454ONE017836	378	150	164	(taa)5	15	5
BB454ONE017913	451	163	177	(aat)5	15	5
BB454ONE018046	473	65	84	(aaat)5	20	5
BB454ONE018338	242	209	242	(ta)17	34	17
BB454ONE018531	485	103	117	(ggt)5	15	5
BB454ONE018533	351	292	309	(ct)9	18	9
BB454ONE018786	338	151	168	(caa)6	18	6
BB454ONE018819	437	334	348	(cca)5	15	5
BB454ONE019061	374	39	53	(tat)5	15	5
BB454ONE019432	492	471	491	(tat)7	21	7
BB454ONE019451	361	116	130	(ata)5	15	5
BB454ONE019489	424	212	231	(tctt)5	20	5
BB454ONE019716	342	212	226	(att)5	15	5
BB454ONE019778	275	31	46	(ta)8	16	8
BB454ONE019801	435	170	184	(caa)5	15	5
BB454ONE019991	150	114	129	(ta)8	16	8
BB454ONE020061	464	300	317	(gtc)6	18	6
BB454ONE020075	455	162	176	(atg)5	15	5
BB454ONE020400	163	70	111	(taa)14	42	14
BB454ONE020426	413	171	185	(tta)5	15	5
BB454ONE020527	468	453	467	(cct)5	15	5
BB454ONE020694	283	143	158	(ta)8	16	8
BB454ONE020706	426	407	422	(gt)8	16	8
BB454ONE020971	307	125	142	(taa)6	18	6
BB454ONE021224	303	102	116	(tta)5	15	5
BB454ONE021248	435	53	67	(tta)5	15	5
BB454ONE021260	396	236	253	(tat)6	18	6
BB454ONE021776	274	164	184	(tat)7	21	7
BB454ONE021776	274	190	204	(ttg)5	15	5
BB454ONE021787	462	181	195	(att)5	15	5
BB454ONE021922	60	4	18	(tat)5	15	5
BB454ONE022130	409	68	85	(aac)6	18	6
BB454ONE022195	421	335	350	(at)8	16	8
BB454ONE022206	379	74	88	(cta)5	15	5
BB454ONE022229	796	332	351	(ttaa)5	20	5
BB454ONE022229	796	772	791	(tacg)5	20	5
BB454ONE022320	209	177	206	(ag)15	30	15
BB454ONE022646	467	373	390	(tat)6	18	6
BB454ONE022819	415	289	312	(tat)8	24	8
BB454ONE022866	431	308	325	(ta)9	18	9
BB454ONE023075	391	334	348	(att)5	15	5
BB454ONE023233	93	43	74	(at)16	32	16
BB454ONE023335	399	290	307	(aat)6	18	6
BB454ONE023440	405	350	370	(cag)7	21	7
BB454ONE023532	474	317	331	(tat)5	15	5
BB454ONE023973	377	131	163	(tat)11	33	11
BB454ONE023973	377	177	200	(tta)8	24	8
BB454ONE023991	212	167	211	(tat)15	45	15
BB454ONE024039	230	192	211	(tc)10	20	10
BB454ONE024110	504	169	183	(gta)5	15	5
BB454ONE024136	333	275	292	(at)9	18	9
BB454ONE024302	424	76	90	(cta)5	15	5
BB454ONE024302	424	375	404	(ac)15	30	15
BB454ONE024302	424	406	423	(ac)9	18	9
BB454ONE024359	454	117	131	(tct)5	15	5
BB454ONE024497	445	395	409	(att)5	15	5
BB454ONE024505	302	276	293	(at)9	18	9
BB454ONE024741	347	328	342	(taa)5	15	5
BB454ONE024845	472	37	54	(taa)6	18	6
BB454ONE024994	360	120	137	(tct)6	18	6
BB454ONE025099	68	1	15	(att)5	15	5
BB454ONE025114	314	57	74	(cag)6	18	6
BB454ONE025145	340	40	60	(tat)7	21	7
BB454ONE025172	329	196	213	(tac)6	18	6
BB454ONE025218	227	209	226	(ct)9	18	9
BB454ONE025375	88	1	18	(taa)6	18	6
BB454ONE025417	299	133	153	(att)7	21	7
BB454ONE025568	387	270	284	(aag)5	15	5
BB454ONE025590	89	14	61	(taa)16	48	16
BB454ONE025706	275	237	251	(aga)5	15	5
BB454ONE025889	138	35	58	(ata)8	24	8
BB454ONE025890	59	36	57	(ct)11	22	11
BB454ONE025917	420	230	256	(att)9	27	9
BB454ONE025985	65	1	15	(att)5	15	5
BB454ONE026342	375	253	270	(ga)9	18	9
BB454ONE026352	314	270	284	(tta)5	15	5
BB454ONE026555	180	136	155	(at)10	20	10
BB454ONE026749	354	224	238	(taa)5	15	5
BB454ONE026758	414	360	380	(tca)7	21	7
BB454ONE026788	400	282	302	(taa)7	21	7
BB454ONE026965	154	114	153	(ga)20	40	20
BB454ONE026972	420	362	379	(ctc)6	18	6
BB454ONE027007	128	56	73	(ta)9	18	9
BB454ONE027342	197	38	55	(gt)9	18	9
BB454ONE027620	369	10	24	(tct)5	15	5
BB454ONE027745	417	299	313	(tca)5	15	5
BB454ONE027866	394	154	168	(att)5	15	5
BB454ONE027953	396	360	374	(tcg)5	15	5
BB454ONE027962	281	254	279	(ga)13	26	13
BB454ONE028099	281	259	280	(ta)11	22	11
BB454ONE028130	273	239	254	(ct)8	16	8
BB454ONE028144	436	43	57	(agg)5	15	5
BB454ONE028176	434	253	276	(att)8	24	8
BB454ONE028220	406	288	305	(ctc)6	18	6
BB454ONE028273	425	264	281	(aat)6	18	6
BB454ONE028579	229	137	151	(aga)5	15	5
BB454ONE028730	421	356	377	(ga)11	22	11
BB454ONE028730	421	382	399	(ga)9	18	9
BB454ONE028772	504	360	375	(at)8	16	8
BB454ONE028993	56	3	17	(att)5	15	5
BB454ONE029462	251	62	76	(ata)5	15	5
BB454ONE029516	435	179	193	(taa)5	15	5
BB454ONE029720	336	244	261	(tat)6	18	6
BB454ONE029953	423	389	403	(tat)5	15	5
BB454ONE030001	507	268	282	(ttc)5	15	5
BB454ONE030155	311	163	180	(ta)9	18	9
BB454ONE030177	306	236	263	(atag)7	28	7
BB454ONE030177	306	264	305	(ag)21	42	21
BB454ONE030424	474	235	252	(att)6	18	6
BB454ONE030436	366	213	230	(att)6	18	6
BB454ONE030510	353	224	244	(tat)7	21	7
BB454ONE030626	204	56	73	(tat)6	18	6
BB454ONE030626	204	119	136	(tc)9	18	9
BB454ONE030626	204	137	158	(ac)11	22	11
BB454ONE030688	432	399	418	(aagt)5	20	5
BB454ONE030697	308	289	306	(ctc)6	18	6
BB454ONE031005	392	49	63	(taa)5	15	5
BB454ONE031005	392	327	341	(taa)5	15	5
BB454ONE031066	406	367	386	(ct)10	20	10
BB454ONE031072	436	233	250	(tat)6	18	6
BB454ONE031182	61	43	60	(at)9	18	9
BB454ONE031433	291	155	170	(ga)8	16	8
BB454ONE031479	322	60	79	(ac)10	20	10
BB454ONE031479	322	114	131	(ca)9	18	9
BB454ONE031508	60	1	18	(ga)9	18	9
BB454ONE031603	213	196	210	(gtg)5	15	5
BB454ONE031629	149	103	135	(taa)11	33	11
BB454ONE031926	100	22	55	(gt)17	34	17
BB454ONE032053	474	355	369	(taa)5	15	5
BB454ONE032155	374	302	317	(at)8	16	8
BB454ONE032170	290	258	281	(aca)8	24	8
BB454ONE032174	173	84	98	(tat)5	15	5
BB454ONE032577	60	1	15	(att)5	15	5
BB454ONE033027	205	43	66	(ata)8	24	8
BB454ONE033683	462	103	120	(gtt)6	18	6
BB454ONE033921	296	277	296	(ga)10	20	10
BB454ONE034086	293	30	47	(ac)9	18	9
BB454ONE034354	164	47	62	(at)8	16	8
BB454ONE034430	218	33	47	(atg)5	15	5
BB454ONE034496	227	130	144	(tta)5	15	5
BB454ONE034668	387	347	361	(gcg)5	15	5
BB454ONE034725	341	315	341	(gat)9	27	9
BB454ONE034900	167	133	166	(tg)17	34	17
BB454ONE034912	73	31	45	(ttc)5	15	5
BB454ONE035044	241	124	138	(taa)5	15	5
BB454ONE035407	388	60	75	(ca)8	16	8
BB454ONE035442	367	24	38	(gat)5	15	5
BB454ONE035516	185	125	144	(ct)10	20	10
